# Supplementary material for: Discovery of Small-Molecule Allosteric Inhibitors of PfATC as Antimalarials
Source: PubMed Central journal article supplement (PMC9585585; doi:10.1021/jacs.2c08128), 2022-10-04
Supplement: ja2c08128_si_001.pdf [file ja2c08128_si_001.pdf]

342 Supporting information for  
343 **Discovery of Small Molecule Allosteric Inhibitors of *Pf*ATC as**  
344 **Antimalarials**  
345 Chao Wang,<sup>&†</sup> Bidong Zhang,<sup>&†</sup> Arne Krüger,<sup>‡</sup> Xiaochen Du,<sup>†</sup> Lidia Visser,<sup>§</sup> Alexander S S  
346 Dömling,<sup>†</sup> Carsten Wrenger,<sup>‡</sup> and Matthew R Groves<sup>\*,†</sup>

347 <sup>†</sup>XB2o Department of Drug Design, Groningen Research Institute of Pharmacy, University of Groningen,  
348 Antonius Deusinglaan 1, 9700 AD, Groningen, The Netherlands

349 <sup>‡</sup>Unit for Drug Discovery, Department of Parasitology, Institute of Biomedical Sciences, University of São  
350 Paulo, Avenida Professor Lineu Prestes 1374, 05508-000 São Paulo-SP, Brazil

351 <sup>§</sup>Department of Pathology and Medical Biology, University of Groningen, University Medical Center, [9700](#)  
352 [RB](#), Groningen. The Netherlands

353

354 **This PDF file includes:**

355

356 Materials and Methods

357 Synthetic Procedures

358 <sup>1</sup>H NMR and <sup>13</sup>C NMR Spectra

359 Supporting information Figures 1 to 10

360 Supporting information Tables 1 to 5

361 References

362

363

364

365

366

367

368

369

370 **METHODS**

371 ***Pf*ATC cloning, expression and purification of ATCs.** Wild type *Pf*ATC-Met3 was cloned,  
372 expressed and purified to homogeneity according to Lunev et al <sup>14</sup>.

373 ***Hs*ATC cloning, expression and purification of ATCs.** The full-length human CAD gene  
374 (carbamoyl-phosphate synthetase 2, aspartate transcarbamylase, and dihydroorotase [Homo  
375 sapiens (human)] Gene ID: 790) was purchased from Eurofins and was amplified by PCR using  
376 Phusion High-Fidelity PCR Master Mix (New England Biolabs), using the forward primer  
377 (*hs*ATC\_fwd; 5'-agggcgccATGCTGCACTCATTAGTGG-3') and reverse primer (*hs*ATC\_rev;  
378 5'-cgaattcgCTAGAAACGGCCCAGCAC-3'). The pETM-41 vector was obtained from European  
379 Molecular Biology Laboratory (EMBL) and the PCR reaction was performed using Phusion High-  
380 Fidelity PCR Master Mix(New England Biolabs), the forward primer sequence (pETM-41\_fwd 5'-  
381 ccgtttctagCGAATTCGAGCTCCGTCG-3') and the reverse primer sequence (pETM-41\_rev 5'-  
382 gcagcatGGCGCCCTGAAAATAAAG-3'). The final expression plasmid pETM-41-*hs*ATC-full  
383 was obtained by Gibson Assembly reaction using E2611 Gibson Assembly Master Mix purchasing  
384 from New England Biolabs, and it encoded the *hu*ATC with N-terminal His<sub>6</sub>-tagged maltose-  
385 binding protein.

386 His-tagged maltose-binding protein *Hs*ATC was recombinantly expressed using *E. coli* BL21  
387 star competent cells transformed with a plasmid containing an MBP and His<sub>6</sub> tagged human ATC  
388 construct (pETM-41-*hs*ATC, Supplementary Table 2). The culture was propagated in 1L of  
389 selective TB media supplemented with 50 µg ml<sup>-1</sup> kanamycin, 35 µg ml<sup>-1</sup> chloramphenicol at 310  
390 K, followed by induction with 0.1 M of IPTG for 18h at 291 K. Bacterial cells were harvested by  
391 centrifugation and resuspended in 35 ml lysis buffer [20 mM Tris-HCl pH 8.0, 0.5 M NaCl, 5%  
392 (v/v) glycerol, 2 mM β-mercaptoethanol (BME)]. Cell lysis was performed by sonication on ice.

393 The lysate was clarified by centrifugation at 45,000g (SS-34 rotor, Thermo Scientific) for 50 min.  
394 The supernatant was filtered using 0.45 µm filter membrane (Whatman) and applied onto a 5 ml  
395 Ni<sup>2+</sup> HisTrap HP column (GE Healthcare, USA). Following washing with Lysis buffer  
396 supplemented with 40 mM imidazole, the *HsATC* protein was eluted by increasing the  
397 concentration of imidazole to 300 mM. Excess imidazole was removed and the His-tag was cleaved  
398 off by overnight dialysis against dialysis buffer [20 mM Tris-HCl pH 7.0, 75 mM NaCl, 5% (v/v)  
399 glycerol, 2 mM β-mercaptoethanol (BME)], with inclusion of TEV protease within dialysis bag.  
400 Then, the sample was loaded onto a 5 ml HiTrap SP HP column (GE Healthcare, USA) and  
401 equilibrated in dialysis buffer. The elate was pooled and concentrated at 277 K to 2 mg ml<sup>-1</sup> using  
402 Vivaspin Turbo 4 concentration column with a 10 kDa cutoff (Sartorius Stedim Biotech, Germany).

403 The concentrated sample was further purified by size-exclusion chromatography (SEC), the  
404 protein was concentrated to a volume of 1 ml and purified via SEC using a HiLoad 16/60 Superdex  
405 75 column (GE Healthcare) pre-equilibrated with SEC buffer [20 mM Tris-HCl pH 7.0, 100 mM  
406 NaCl, 2% (v/v) glycerol, 0.2 mM tris(2-carboxyethyl)phosphine(TCEP)], using NGC liquid  
407 chromatography system (BioRad). The purified protein as a single peak and was pooled and  
408 concentrated to 2 mg ml<sup>-1</sup> at 277 K. the final concentration was determined based on the protein  
409 theoretical absorbance at 280 nm [ABS 0.1% (1mg ml<sup>-1</sup>) = 0.354].

410 ***PfATC* activity assay.** Enzymatic reactions were performed in a total volume of 150 µL in 50 mM  
411 Tris-Acetate buffer at pH 8.0 and the final concentration of *PfATC* is 50 nM. L-Aspartate (Asp)  
412 and carbamoyl-phosphate (CP) saturation curves of the enzymes were assayed using a fixed  
413 concentration of CP (2 mM) and L-aspartate (1mM). Small-molecule dose-response curves were  
414 measured using assay buffer supplemented with 2% (v/v) DMSO, 2 mM CP and 1mM aspartate.  
415 *PfATC* was pre-incubated with Asp and compounds for 10 min by putting the plate in a shaker at  
416 room temperature. The reactions were initiated by adding CP and quenched after 10 min with

417 100 $\mu$ L of stop mix (two volumes of Antipyrine (26.5 mM 2,3-Dimethyl-1-phenyl-3-pyrazolin-5-  
418 one in 50% (v/v) sulfuric acid) and one volume of 2,3-Butanedione monoxime (80 mM 2,3-  
419 Butanedione monoxime in 5% (v/v) acetic acid). After plates were sealed with transparent sealing  
420 tape to prevent evaporation and incubated overnight in the dark place at room temperature. After  
421 incubation, the plates were heated at 95°C for 15 min in dark place, and kept for 30 min before  
422 measuring at 466 nm using a Synergy H1 Hybrid Reader (BioTek). Analyses were performed using  
423 Microsoft Excel and Graph Pad Prism.

424 ***Hs*ATC activity assay.** The enzymatic assay was performed as described herein above for  
425 enzymatic assay of *Pf*ATC with minor modifications. Briefly, the reaction was carried out at room  
426 temperature in a total volume of 150  $\mu$ l of 10 mM L-aspartate and 5 mM carbamoyl phosphate  
427 saturated substrate solution in 50 mM Tris-Acetate buffer pH 8.3. *hs*ATC was pre-incubated with  
428 inhibitor and L-Asp for 10 min at room temperature on a shaker. The reaction was initiated by  
429 adding CP and stopped after 5 min with 10 ml color mix. Then the plate was covered by sealing  
430 tape and kept in dark place at room temperature and then heated to 95°C for 15min in dark and kept  
431 the plate in the dark for another 30 min before measuring the absorbance at 466 nm using a Synergy  
432 H1 Hybrid Reader (BioTek). Analyses were performed using Microsoft Excel and Graph Pad  
433 Prism.

434 **Human cell line experiments.** The cell lines A375 (melanoma), H1299 (lungca), MCF7  
435 (breastca), REC-1 (mantel cell lymphoma, SUDHL2 (diffuse large B-cell lymphoma) and normal  
436 lymphocytes (obtained from tonsils) were cultured in RPMI 1640 (Lonza BioWhittaker,  
437 Walkersville, MD, USA) with 10% fetal bovine serum (FBS; HyClone Thermo Scientific,  
438 Waltham, MA, USA). Cells were plated in 96-wells plates and incubated with increasing  
439 concentrations of compounds for 72 hours as indicated. All experiments were performed in

440 triplicate. AlamarBlue (Thermo Fisher Scientific, Waltham, MA USA) was added eight hours prior  
441 to read-out (extinction 560nm, emission 590nm).

442 **Crystallization of *Pf*ATC in complex with Fragment A/B/C/D.** A freshly prepared protein  
443 solution at a concentration of 10 mg ml<sup>-1</sup> and immediately used in crystallization trials. The  
444 screening for crystallization conditions for *Pf*ATC was performed using a high-through  
445 crystallization robot (Gryphon, Art Robbins) against commercially available sparse-matrix  
446 screening kits (JCSG *plus* and PACT *premier*; Molecular Dimensions Ltd.). All experiments were  
447 performed at 293 K using the sitting drop vapor diffusion technique in 96 well MRC2 plates  
448 (Molecular Dimensions Ltd.). Equal volumes (0.2 µL) of protein solution and crystallization  
449 reagent were equilibrated against 50 µL of reservoir solution. Medium size single crystals appeared  
450 overnight in various conditions containing PEG3350/4000. The apo-crystals were soaked for 10  
451 min using crystallization-liquor supplemented with 10 mM fragment A/B/C/D and transferred to  
452 the solution plus 20% glycerol, flash-cooled and stored in liquid nitrogen. The flashed cooled  
453 crystals was shipped to Petra III, Deutsches Elektronen-Synchrotron DESY Beamline P11.  
454 Crystallization conditions parameters are summarized in **Table S4**.

455 **Crystallization of *Pf*ATC in complex with Compound 1/BDA-04/BDA-14.** The purified *Pf*ATC  
456 protein at a concentration of 10 mg ml<sup>-1</sup> was incubate with compound 1/BDA-04/BDA-14 (10 mM  
457 stocks in 100% DMSO) at a molar ratio of 1:5. The mixture was incubated at 20 °C for 40 minutes,  
458 then centrifugation was performed to remove the precipitate. The supernatant was immediately  
459 used in crystallization trials. The crystallization reagent were the same as apo crystallization  
460 condition plus 5% DMSO (v/v) compound 1/BDA-04/BDA-14 (1 mM). The crystals were flash-  
461 cooled and stored in liquid nitrogen, and was shipped to Petra III, Deutsches Elektronen-  
462 Synchrotron DESY Beamline P11. Crystallization conditions parameters are summarized in **Table**  
463 **S4**.

464 **Data collection, processing and refinement.** All the diffraction data sets were collected using  
465 synchrotron radiation wavelength 1.033200 Å at DESY beamline P11. The data collected for  
466 *PfATC* crystals grown in presence of fragments and compounds were processed using XDSAPP<sup>25</sup>  
467 and Aimless<sup>26</sup>, and the structures were solved and initially refined using the DIMPLE pipeline  
468 within CCP4 suite<sup>26</sup> with coordinates of the unliganded *PfATC* (5ILQ) as a starting model. The  
469 final refinement included manual rebuilding in coot<sup>27</sup> and Refmac5<sup>28</sup>. The resulting crystal  
470 structures were deposited in PDB<sup>29</sup>. Data collection and processing statistics are show in **Table**  
471 **S5**.

472 **Differential Scanning Fluorimetry (DSF).** The purified *PfATC* was incubate with 5000 × Sypro  
473 Orange (Invitrogen) and dilution it to 1:400 stock of dye in assay buffer (50 mM Tris-HCl pH=8.0  
474 and 300 mM NaCl). Each reaction consisted of 2 µL compound (10 mM stock in 100% DMSO), 5  
475 µL *PfATC*-Sypro orange mixture and 43 µL assay buffer. Final protein assay concentration was  
476 5µM, final DMSO concentration war 2% (v/v). After incubation for 20 min at 20 °C, the samples  
477 were hated from 25°C to 95°C at a rate of 0.5 °C min<sup>-1</sup>. The inflection points of the melting curves  
478 were determined using BioRad CSV 96 control software and processed & plotted by GraphPad.

479 **Microscale Thermophoresis (MST).** MST measurements were performed on a Nanotemper  
480 Monolith NT.115 instrument (Nanotemper Technologies GmbH). Purified *PfATC* was labeled  
481 using the RED-NHS Monolith Protein Labelling Kit according to manufacturer's protocol. The  
482 MST measurements were performed in MST buffer (50 mM Tris-base pH= 8.0, 300 mM NaCl)  
483 supplemented with 0.05% (v/v) Tween 20 in standard capillaries (Nanotemper Technologies  
484 GmbH). Labeled *PfATC* was used at a final concentration of 20nM. The compounds were titrated  
485 in a 1:1 dilution following the manufacturer's protocol. All binding reaction were incubated for 10  
486 min followed by centrifugation at 20000g prior to loading. All measurements were performed in  
487 triplicate at 20% LED and 40% MST power.

488 **Cell culture and growth-inhibition assay of *P. falciparum*.** *P. falciparum* 3D7 parasites  
489 (Wellcome Trust Dundee) were maintained in continuous culture at 37 °C and an atmosphere  
490 consisting of 90% N<sub>2</sub>, 5% O<sub>2</sub>, and 5% CO<sub>2</sub> as described previously<sup>30</sup> with modifications.<sup>31</sup>  
491 Parasites were maintained in 25 mM 4-(2-hydroxyethyl)-1-piperazineethanesulfonic acid (HEPES)  
492 and 11.9 mM sodium bicarbonate buffered RPMI 1640 medium supplemented with D-glucose  
493 (11 mM), hypoxanthine, AlbuMAX-I (0.5% w/v), and 10 µg/mL gentamicin. 0+ blood was  
494 provided by “Hospital Novo Atibaia” (Brazil) in agreement with the ethics committee at ICB-USP.  
495 Compounds were tested for their inhibitory effect against *P. falciparum* 3D7 conducting SYBR  
496 Green I (Invitrogen) drug assays as reported.<sup>32,33</sup> Briefly, two-fold serial dilutions of compounds  
497 were prepared in 96-well plates starting from 100 and 20 µM in technical triplicate and incubated  
498 for 96 h under normal growth conditions using an initial parasitemia of 0.5% and a hematocrit of  
499 2% in a volume of 100 µL per well. Parasite proliferation was measured by quantifying DNA via  
500 SYBR Green I emitted fluorescence in the wells after addition of 100 µL lysis buffer supplemented  
501 with SYBR Green I (0.02% v/v) and incubation for 1 h at room temperature in the dark.  
502 Fluorescence was quantified using a CLARIOstar plate reader (BMG Labtech, Germany) at  
503 excitation and emission wavelength bands of 485 (± 9) and 530 (± 12) nm, respectively. Focal and  
504 gain adjustment was performed using the negative controls (highest expected fluorescence signal).  
505 Data was acquired via the CLARIOstar (V5.20) and MARS software, manually normalized, and  
506 plotted using the nonlinear regression curve fit implemented in GraphPad Prism as described below  
507 in more detail. Non-treated parasites, highest solvent concentration on parasites, and highest drug  
508 concentration in medium were used as controls for maximal growth, solvent control, and native  
509 drug fluorescence, respectively.

510

511 **Nonlinear regression fit and analysis of dose-response drug assays.** Nonlinear regression as  
512 implemented in GraphPad Prism 8.4.3 (log(inhibitor) vs. response – Variable slope (four  
513 parameters)) was used to fit the measured data to interpolate the IC<sub>50</sub> value from the curve. No  
514 specific model was applied. Data was pre-processed by min-max-scaling according to the  
515 following formula

$$516 \quad y_{normalized} = \frac{y - y_{minimum}}{y_{maximum} - y_{minimum}}$$

517 where  $y$  is the fluorescence signal in each well,  $y_{minimum}$  the background fluorescence, and  $y_{maximum}$   
518 the highest measured fluorescence signal in the untreated wells. Drug concentrations (in  $\mu\text{M}$ ) were  
519 transformed to the  $\log(10)$  of the values. Means of each independent experiment were plotted as  
520 individual values, and the SD of the mean from the means shown as error bars. The test for  
521 *homoscedasticity* was performed to confirm if no weighting of values was appropriate.

522

523

524

525

526

527

528

529

530

531

532

533



534 **BDA series syntheses**

535

536 **General methods**

537 All chemicals were purchased from commercial suppliers and used without any purification  
538 unless otherwise noted. <sup>1</sup>H NMR (500 MHz) and <sup>13</sup>C NMR (126 MHz) were recorded on a Bruker  
539 Avance 500 spectrometer. <sup>1</sup>H and <sup>13</sup>C NMR spectra were reported in parts per million (ppm)  
540 referenced to deuterated solvents, for example, CDCl<sub>3</sub>: δ = 7.26 ppm (<sup>1</sup>H) and 77.05 ppm (<sup>13</sup>C) or  
541 DMSO-d<sub>6</sub>: δ = 2.50 ppm (<sup>1</sup>H) and 39.52 ppm (<sup>13</sup>C). Chemical shifts for <sup>1</sup>H NMR were reported as  
542 δ values and coupling constants were in hertz (Hz). The following abbreviations were used for spin  
543 multiplicity: s = singlet, bs = broad singlet, d = doublet, t = triplet, q = quartet, quin = quintet, dd  
544 = double of doublets, ddd = double of doublet of doublets, m = multiplet. Chemical shifts for <sup>13</sup>C  
545 NMR reported in ppm relative to the solvent peak. Thin layer chromatography was performed on  
546 silica gel plates (0.20 mm thick, particle size 25 μm). Flash chromatography was performed using  
547 RediSep Rf Normal-phase Silica Flash Columns (Silica Gel 60 Å, 230-400 mesh). High resolution  
548 mass spectra were recorded using a LTQOrbitrap- XL (Thermo) at a resolution of 60000@m/z400.  
549

550 **Scheme 1. Syntheses of compounds BDA-01-31, BDA-34, BDA-37, BDA-38, BDA-39, BDA-46, BDA-**  
551 **49, BDA-50, BDA-55, BDA-57, BDA-58, BDA-59, BDA-60, BDA-61, BDA-62, BDA-63, BDA-70.<sup>a</sup>**

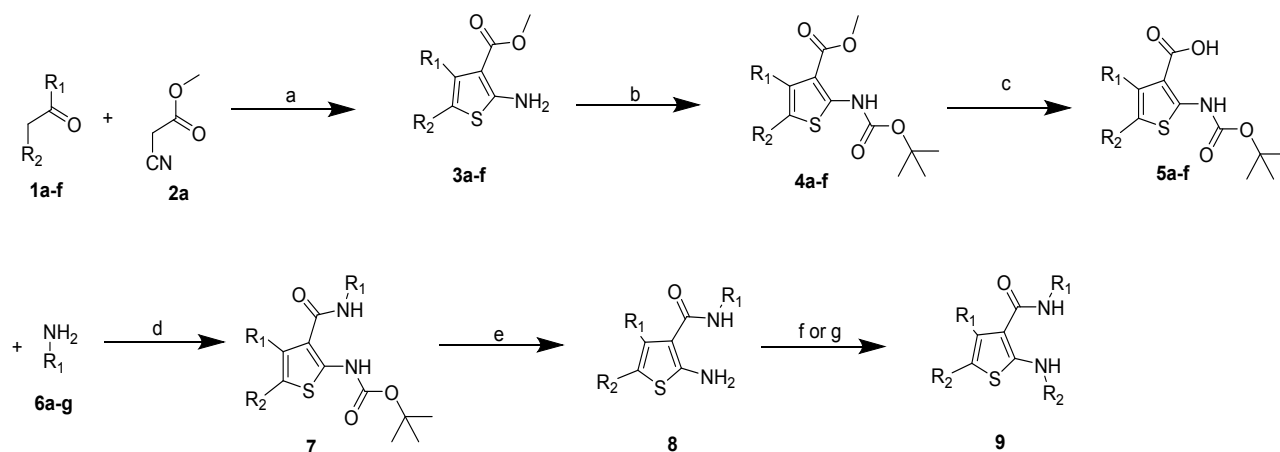

552 <sup>a</sup>Reagents and conditions: (a) S, Et<sub>3</sub>N, EtOH, 50 °C, 16 h; (b) Boc<sub>2</sub>O, DMAP, Dioxane, 60 °C, 4 h; (c)  
553 NaOH, MeOH : H<sub>2</sub>O : THF = 2 : 2 : 1, 80 °C, 6 h; (d) HATU, DCM, rt, 12 h; (e) TFA, DCM, rt, 1 h; (f)  
554 NaBH(OAc)<sub>3</sub>, DCM, AcOH, rt, 18 h; (g) HATU, DCM, rt, 12 h.  
555  
556  
557

558 **General Procedure for Preparing the products Using Method A**

559 **As Described in Scheme 1:**

560 **Step1:**

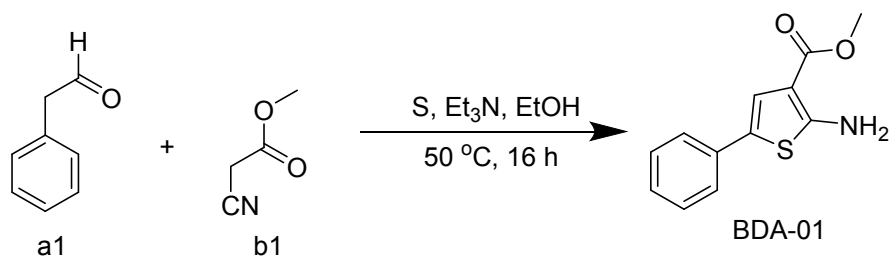

561  
 562 A 100 mL round bottom flask was charged with 2-phenylacetaldehyde (**a1**, 6 mL (6 g), 50 mmol,  
 563 1.0 eq), methyl 2-cyanoacetate (**b1**, 5 mL (5.1 g), 55 mmol, 1.1 eq), sulfur (1.6 g, 60 mmol, 1.2  
 564 eq), and triethylamine (7 mL (5.05 g), 50 mmol, 1.0 eq) in ethanol (70 mL). The reaction is heated  
 565 50 °C in an oil bath for 16 h. Then, the reaction was cooled down to room temperature. A batch of  
 566 120 mL ice water was poured into the mixture to yield a precipitate which was filtered and washed  
 567 with cold ethanol to obtain 8.1 g (68%) of the title compound **BDA-01** as light yellow powder.

568  
 569 **Step2:**

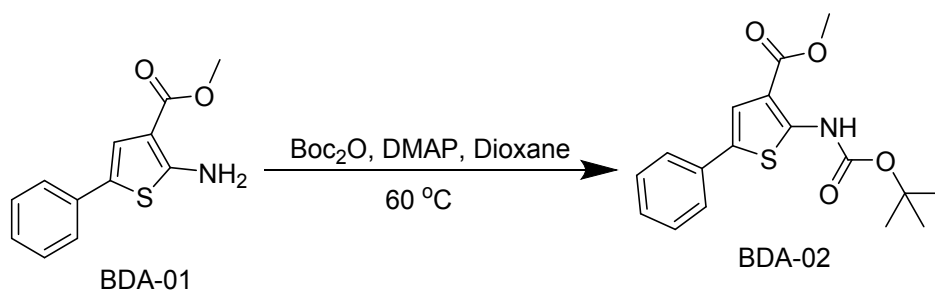

570  
 571 To a 50 mL round bottom flask were added dioxane (30 mL), compound **BDA-01** (1.16 g, 5 mmol,  
 572 1.0 eq),  $\text{Boc}_2\text{O}$  (2.18 g, 10 mmol, 2.0 eq) and DMAP (61 mg, 0.5mmol, 0.1 eq) and the reaction  
 573 mixture was stirred at 60 °C for 4 h. Then  $\text{N}_2\text{H}_4 \cdot \text{H}_2\text{O}$  (0.75g, 15mmol, 3.0 eq) was added and the  
 574 mixture was stirred at 40 °C for an additional 1.5 h. After cooling to room temperature the solvent  
 575 was removed under reduced pressure, and the residue was purified by column chromatography on  
 576 silica gel (EtOAc–heptane 5  $\rightarrow$  50%) to yield the methyl ester of **BDA-02** (1.35 g, 81%).

577 **Step 3:**

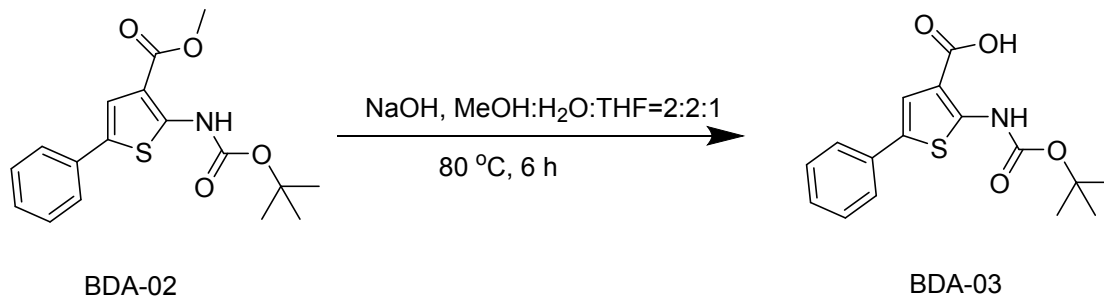

578

579 The ester **BDA-02** (1.67 g, 5 mmol, 1.0 eq) was subsequently subjected to a base hydrolysis at  
580 80 °C for 6 h with a solution of NaOH (2.7 g, 13.5 eq) in 100 mL of a solvent mixture (MeOH–  
581 H<sub>2</sub>O–THF = 2:2:1). The reaction was cooled to room temperature and the organic solvents were  
582 removed in vacuo. The aqueous layer was acidified with 5% HCl to give a precipitate, which was  
583 triturated with methanol to afford compound **BDA-03** (1.2 g, 70%) as yellow solid.

584 **Step 4:**

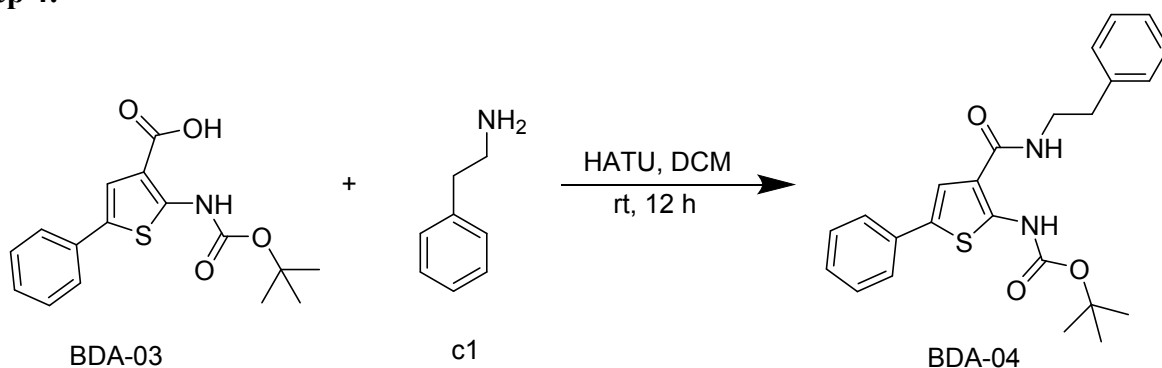

To a solution of compound **BDA-03** (110 mg, 0.34 mmol, 1.0 eq) and DIPEA (180 μL, 1.02 mmol, 3.0 eq) in DCM (10 mL) was added HATU (155 mg, 0.408 mmol, 1.2 eq) and amine **c1** (50 mg, 0.408 mmol, 1.2 eq). The reaction mixture was stirred at room temperature for 12 h. The mixture was washed with water and extracted with EtOAc. The organic layer was separated, dried over MgSO<sub>4</sub>, filtered and concentrated under reduced pressure. The residue was purified by column chromatography on silica gel using EtOAc–PE (5% → 50%) as an eluent to give **BDA-04** (106 mg, 74%) purple solid.

593 **Step 5:**

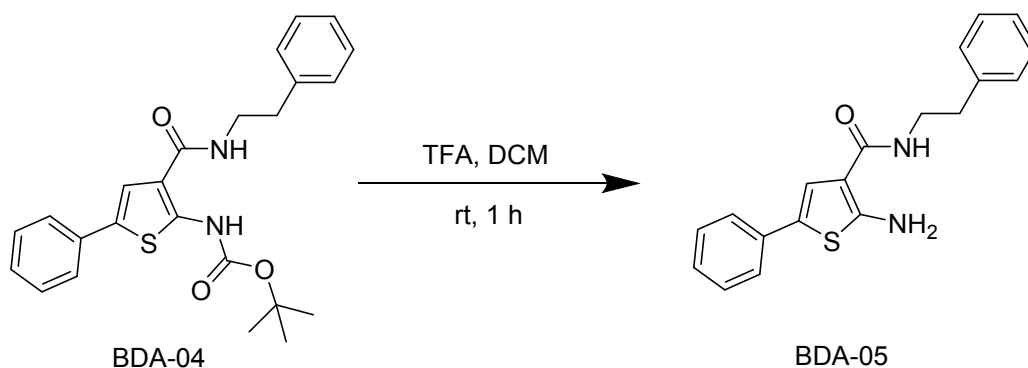

To a solution of compound **BDA-04** (60 mg, 0.142 mmol, 1.0 eq) in DCM (5 mL) was added TFA (2 mL) in DCM (2 mL) at room temperature for 1 h. The solvent was evaporated by high vacuum to give the final product **BDA-05** (45 mg, 98%).

598  
599 **Step 6:**

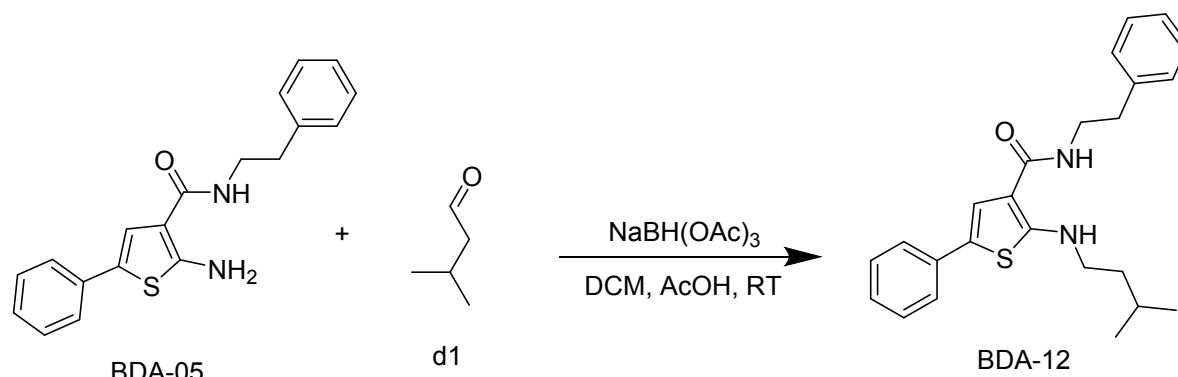

600  
 601 To a solution of **BDA-05** (333 mg, 1.0 mmol, 1.0 eq) in dichloromethane (10 mL) and acetic acid  
 602 (0.05 mL) were added 3-methylbutanal **d1** (87 mg, 1.0 mmol, 1.0 eq) and sodium  
 603 triacetoxyborohydride (255 mg, 1.2 mmol, 1.0 eq). The reaction mixture was stirred for 18 h at  
 604 room temperature and concentrated. The residue was dissolved in ethyl acetate, washed with  
 605 aqueous sodium bicarbonate solution and with water, dried over anhydrous  $\text{MgSO}_4$  and  
 606 concentrated. The residual oil was purified on a silica gel flash chromatography column eluted with  
 607 EtOAc–PE (5%  $\rightarrow$  50%) to afford the desire compound **BDA-12** as a slightly yellow oil (294 mg,  
 608 75% yield).

609  
 610 **Step 7:**

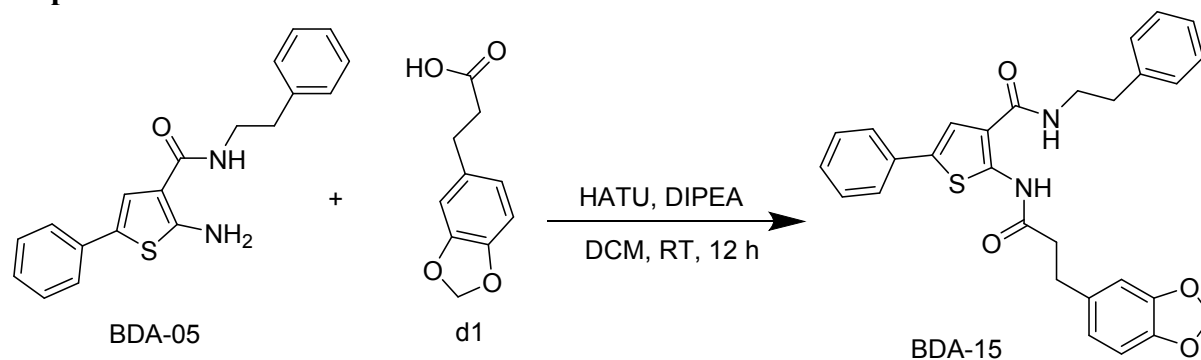

611  
 612  
 613 To a solution of compound **BDA-05** (333 mg, 1.0 mmol, 1.0 eq) and DIPEA (540  $\mu\text{L}$ , 3.0 mmol,  
 614 3.0 eq) in DCM (10 mL) was added HATU (420 mg, 1.1 mmol, 1.1eq) and acid **d1** (195 mg, 1.0  
 615 mmol, 1.0 eq). The reaction mixture was stirred at room temperature for 12 h. The mixture was  
 616 washed with water and extracted with EtOAc. The organic layer was separated, dried over  $\text{MgSO}_4$ ,  
 617 filtered and concentrated under reduced pressure. The residue was purified by column  
 618 chromatography on silica gel using EtOAc–PE (5%  $\rightarrow$  50%) as an eluent to give **BDA-15** (318  
 619 mg, 64%) yellow solid.

620

621 **BDA-01: methyl 2-amino-5-phenylthiophene-3-carboxylate**

622 The product was synthesized according to procedure **step 1** and purified by column  
623 chromatography and afforded as yellow solid (8.1 g, 68% yield), M.P.= 178 - 182 °C; <sup>1</sup>H NMR  
624 (500 MHz, CDCl<sub>3</sub>) δ 7.46 (dd, *J* = 8.4, 1.2 Hz, 2H), 7.35 (t, *J* = 7.8 Hz, 2H), 7.26 (s, 1H), 7.23 (s,  
625 1H), 6.05 (s, 2H), 3.86 (s, 3H). <sup>13</sup>C NMR (126 MHz, CDCl<sub>3</sub>) δ 165.80, 162.22, 133.94, 128.85,  
626 126.65, 126.61, 124.70, 121.10, 107.61, 51.15. HRMS (ESI) *m/z* calculated for C<sub>12</sub>H<sub>11</sub>NO<sub>2</sub>S  
627 [M+H]<sup>+</sup>: 234.0524; found [M+H]<sup>+</sup>: 234.0521.

628

629 **BDA-02: methyl 2-((tert-butoxycarbonyl)amino)-5-phenylthiophene-3-carboxylate**

630 The product was synthesized according to procedure **step 2** and purified by column  
631 chromatography and afforded as yellow solid (1.3 g, 81% yield), M.P.= 176 - 181 °C; <sup>1</sup>H NMR  
632 (500 MHz, CDCl<sub>3</sub>) δ 7.63 – 7.61 (m, 1H), 7.60 (s, 2H), 7.42 (t, *J* = 7.6 Hz, 2H), 7.35 (t, *J* = 7.3 Hz,  
633 1H), 3.87 (s, 3H), 1.46 (s, 9H). <sup>13</sup>C NMR (126 MHz, CDCl<sub>3</sub>) δ 165.74, 152.12, 150.50, 133.76,  
634 128.93, 127.26, 127.22, 125.17, 119.41, 111.77, 82.50, 51.68, 28.22. HRMS (ESI) *m/z* calculated  
635 for C<sub>17</sub>H<sub>19</sub>NO<sub>4</sub>S [M+H]<sup>+</sup>: 334.1015; found [M+H]<sup>+</sup>: 334.1013.

636

637 **BDA-03: 2-((tert-butoxycarbonyl)amino)-5-phenylthiophene-3-carboxylic acid**

638 The product was synthesized according to procedure **step 3** and purified by column  
639 chromatography and afforded as white solid (1.2 g, 70% yield), M.P.= 196 - 201 °C;  
640 <sup>1</sup>H NMR (500 MHz, DMSO- *d*<sub>6</sub>) δ 12.58 (s, 1H), 7.54 (d, *J* = 8.2 Hz, 2H), 7.42 (s, 1H), 7.36 (t, *J*  
641 = 7.8 Hz, 2H), 7.21 (t, *J* = 7.3 Hz, 1H), 1.50 (s, 9H). <sup>13</sup>C NMR (126 MHz, DMSO- *d*<sub>6</sub>) δ 168.99,  
642 152.14, 144.23, 134.99, 129.49, 129.01, 126.79, 124.65, 123.51, 122.97, 80.82, 28.42. HRMS (ESI)  
643 *m/z* calculated for C<sub>16</sub>H<sub>17</sub>NO<sub>4</sub>S [M+H]<sup>+</sup>: 320.0937; found [M+H]<sup>+</sup>: 320.0931.

644

645 **BDA-04: tert-butyl (3-(phenethylcarbamoyl)-5-phenylthiophen-2-yl)carbamate**

646 The product was synthesized according to procedure **step 4** and purified by column  
647 chromatography and afforded as yellow solid (106 mg, 74% yield), M.P.= 168 - 173 °C; <sup>1</sup>H NMR  
648 (500 MHz, CDCl<sub>3</sub>) δ 10.97 (s, 1H), 7.53 (d, *J* = 8.2 Hz, 2H), 7.37 (t, *J* = 7.5 Hz, 4H), 7.29 (s, 1H),  
649 7.27 (d, *J* = 7.1 Hz, 3H), 6.96 (s, 1H), 5.98 (s, 1H), 3.70 (q, *J* = 6.9 Hz, 2H), 2.96 (t, *J* = 7.0 Hz,  
650 2H), 1.57 (s, 9H). <sup>13</sup>C NMR (126 MHz, CDCl<sub>3</sub>) δ 165.23, 152.46, 148.56, 138.77, 133.76, 132.83,

651 128.97, 128.85, 128.80, 127.31, 126.73, 125.17, 116.09, 113.67, 81.99, 40.71, 35.90, 28.26. HRMS  
652 (ESI) m/z calculated for C<sub>24</sub>H<sub>26</sub>N<sub>2</sub>O<sub>3</sub>S [M+H]<sup>+</sup>: 423.1738; found [M+H]<sup>+</sup>: 423.1733.

653  
654 **BDA-05: 2-amino-N-phenethyl-5-phenylthiophene-3-carboxamide**  
655 The product was synthesized according to procedure **step 5** and afforded as yellow solid (45 mg,  
656 98% yield), M.P.= 198 - 202 °C; <sup>1</sup>H NMR (500 MHz, CDCl<sub>3</sub>) δ 7.41 (d, *J* = 7.7 Hz, 2H), 7.35 (q,  
657 *J* = 8.0 Hz, 4H), 7.31 – 7.19 (m, 5H), 6.88 (s, 1H), 5.92 (s, 2H), 3.67 (d, *J* = 6.3 Hz, 2H), 2.94 (d,  
658 *J* = 6.8 Hz, 2H). <sup>13</sup>C NMR (126 MHz, CDCl<sub>3</sub>) δ 165.98, 160.54, 139.18, 134.05, 128.92, 128.71,  
659 126.62, 126.55, 125.17, 124.64, 118.31, 109.71, 40.64, 36.13. HRMS (ESI) m/z calculated for  
660 C<sub>19</sub>H<sub>18</sub>N<sub>2</sub>OS [M+H]<sup>+</sup>: 323.1147; found [M+H]<sup>+</sup>: 323.1141.

661  
662 **BDA-06: tert-butyl (5-phenyl-3-((4-sulfamoylphenethyl)carbamoyl)**  
663 **thiophen-2-yl)carbamate**

664 The product was synthesized according to procedure **step 4** and purified by column  
665 chromatography and afforded as yellow solid (333 mg, 85% yield), M.P.= 198 - 203 °C;  
666 <sup>1</sup>H NMR (500 MHz, DMSO- *d*<sub>6</sub>) δ 11.29 (s, 1H), 7.82 (s, 1H), 7.77 (d, *J* = 8.4 Hz, 1H), 7.55 (d, *J*  
667 = 7.1 Hz, 2H), 7.48 – 7.40 (m, 4H), 7.31 (s, 2H), 5.77 (s, 2H), 3.52 (q, *J* = 7.9, 7.3 Hz, 2H), 2.94  
668 (t, *J* = 7.3 Hz, 2H), 1.51 (s, 9H). <sup>13</sup>C NMR (126 MHz, DMSO- *d*<sub>6</sub>) δ 165.22, 151.84, 147.14, 144.02,  
669 142.59, 133.92, 131.49, 129.70, 129.61, 127.76, 126.35, 126.14, 125.06, 124.91, 119.38, 114.99,  
670 82.15, 55.40, 35.22, 28.18. HRMS (ESI) m/z calculated for C<sub>24</sub>H<sub>27</sub>N<sub>3</sub>O<sub>5</sub>S<sub>2</sub> [M+H]<sup>+</sup>: 502.1427;  
671 found [M+H]<sup>+</sup>: 502.1424.

672  
673 **BDA-07: 2-amino-5-phenyl-N-(4-sulfamoylphenethyl)thiophene-3-carboxamide**

674 The product was synthesized according to procedure **step 5** and afforded as red solid (89 mg, 98%  
675 yield), M.P.= 228 - 233 °C; <sup>1</sup>H NMR (500 MHz, DMSO- *d*<sub>6</sub>) δ 7.93 (t, *J* = 5.7 Hz, 1H), 7.77 (d, *J*  
676 = 8.2 Hz, 2H), 7.59 (s, 1H), 7.49 (s, 2H), 7.45 (d, *J* = 8.4 Hz, 2H), 7.40 (d, *J* = 6.8 Hz, 2H), 7.36  
677 (t, *J* = 7.7 Hz, 2H), 7.32 (s, 2H), 7.18 (t, *J* = 7.1 Hz, 1H), 3.49 – 3.43 (m, 2H), 2.91 (t, *J* = 7.3 Hz,  
678 2H). <sup>13</sup>C NMR (126 MHz, DMSO- *d*<sub>6</sub>) δ 165.80, 165.78, 161.34, 161.24, 144.43, 142.17, 142.14,  
679 134.59, 129.30, 128.86, 126.18, 126.12, 126.05, 123.96, 123.01, 122.98, 119.72, 108.93, 40.15,  
680 35.68. HRMS (ESI) m/z calculated for C<sub>19</sub>H<sub>19</sub>N<sub>3</sub>O<sub>3</sub>S<sub>2</sub> [M+H]<sup>+</sup>: 402.0917; found [M+H]<sup>+</sup>: 402.0914.

681

682 **BDA-08: 2-(2-(1H-indol-3-yl)acetamido)-N-phenethyl-5-phenylthiophene-3-carboxamide**

683 The product was synthesized according to procedure **step 7** and purified by column  
684 chromatography and afforded as brown solid (157 mg, 78% yield), M.P.= 201 - 203 °C;

685 <sup>1</sup>H NMR (500 MHz, DMSO- *d*<sub>6</sub>) δ 12.06 (s, 1H), 11.12 (s, 1H), 8.44 (t, *J* = 5.7 Hz, 1H), 7.81 (s,  
686 1H), 7.54 (t, *J* = 8.8 Hz, 3H), 7.46 – 7.38 (m, 4H), 7.30 (q, *J* = 9.0, 8.4 Hz, 3H), 7.22 (dd, *J* = 11.4,  
687 7.2 Hz, 3H), 7.10 (t, *J* = 7.6 Hz, 1H), 7.00 (t, *J* = 6.9 Hz, 1H), 3.97 (s, 2H), 3.42 (q, *J* = 8.4, 7.3 Hz,  
688 2H), 2.80 (t, *J* = 7.6 Hz, 2H). <sup>13</sup>C NMR (126 MHz, DMSO- *d*<sub>6</sub>) δ 169.31, 164.79, 145.09, 139.79,  
689 136.78, 134.03, 132.16, 129.72, 129.12, 128.87, 127.77, 127.47, 126.65, 125.35, 125.23, 125.06,  
690 121.75, 119.20, 118.87, 116.48, 112.05, 107.21, 40.87, 35.43, 33.56. HRMS (ESI) *m/z* calculated  
691 for C<sub>29</sub>H<sub>25</sub>N<sub>3</sub>O<sub>2</sub>S [M+H]<sup>+</sup>: 480.1743; found [M+H]<sup>+</sup>: 480.1740.

692  
693 **BDA-09: tert-butyl (3-(4-(((tert-butoxycarbonyl)amino)methyl)piperidine-1-carbonyl)-5-**  
694 **phenylthiophen-2-yl)carbamate**

695 The product was synthesized according to procedure **step 4** and purified by column  
696 chromatography and afforded as yellow solid (264 mg, 80% yield), M.P.= 170 - 173 °C;

697 <sup>1</sup>H NMR (500 MHz, CDCl<sub>3</sub>) δ 10.95 (s, 1H), 7.58 (d, *J* = 7.1 Hz, 2H), 7.38 (t, *J* = 7.7 Hz, 2H),  
698 7.29 (d, *J* = 2.2 Hz, 1H), 7.09 (s, 1H), 5.85 (d, *J* = 7.9 Hz, 1H), 4.10 (dtd, *J* = 11.3, 7.4, 3.9 Hz,  
699 3H), 2.92 (s, 2H), 2.03 (d, *J* = 15.0 Hz, 2H), 1.63 (s, 2H), 1.56 (s, 9H), 1.49 (s, 9H), 1.48 – 1.39  
700 (m, 2H). <sup>13</sup>C NMR (126 MHz, CDCl<sub>3</sub>) δ 164.67, 154.74, 152.39, 148.81, 133.73, 132.93, 128.97,  
701 127.36, 125.21, 116.12, 113.47, 82.00, 79.82, 47.02, 32.24, 28.45, 28.24. HRMS (ESI) *m/z*  
702 calculated for C<sub>27</sub>H<sub>37</sub>N<sub>3</sub>O<sub>5</sub>S [M+H]<sup>+</sup>: 516.2517; found [M+H]<sup>+</sup>: 516.2514.

703 **BDA-10: tert-butyl (3-(4-(4-fluorophenyl)piperazine-1-carbonyl)-5-phenylthiophen-2-**  
704 **yl)carbamate**

705 The product was synthesized according to procedure **step 4** and purified by column  
706 chromatography and afforded as yellow solid (159 mg, 83% yield), M.P.= 178 - 182 °C;

707 <sup>1</sup>H NMR (500 MHz, CDCl<sub>3</sub>) δ 9.60 (s, 1H), 7.57 (d, *J* = 7.1 Hz, 2H), 7.39 (t, *J* = 7.7 Hz, 2H), 7.31  
708 – 7.28 (m, 2H), 7.07 (s, 1H), 7.04 – 6.99 (m, 2H), 6.96 – 6.91 (m, 2H), 3.94 – 3.88 (m, 4H), 3.22  
709 – 3.15 (m, 4H), 1.56 (s, 9H). <sup>13</sup>C NMR (126 MHz, CDCl<sub>3</sub>) δ 166.57, 158.66, 156.75, 152.26, 147.75,  
710 147.54, 133.83, 132.71, 128.99, 127.33, 125.24, 118.96, 118.64, 118.57, 115.86, 115.68, 114.68,  
711 82.11, 50.77, 28.25. HRMS (ESI) *m/z* calculated for C<sub>26</sub>H<sub>28</sub>FN<sub>3</sub>O<sub>3</sub>S [M+H]<sup>+</sup>: 482.1836; found  
712 [M+H]<sup>+</sup>: 482.1832.

713

714 **BDA-11: tert-butyl (3-((4-hydroxyphenethyl)carbamoyl)-5-phenylthiophen-2-yl)carbamate**

715 The product was synthesized according to procedure **step 4** and purified by column  
716 chromatography and afforded as yellow solid (195 mg, 91% yield), M.P.= 174 - 176 °C;

717 <sup>1</sup>H NMR (500 MHz, CDCl<sub>3</sub>) δ 10.94 (s, 1H), 7.51 (dd, *J* = 8.3, 1.3 Hz, 2H), 7.36 (t, *J* = 7.7 Hz,  
718 2H), 7.27 (t, *J* = 7.4 Hz, 1H), 7.11 (d, *J* = 8.5 Hz, 2H), 6.95 (s, 1H), 6.84 (d, *J* = 8.5 Hz, 2H), 6.02  
719 (t, *J* = 6.0 Hz, 1H), 5.47 (s, 1H), 3.64 (q, *J* = 7.0 Hz, 2H), 2.87 (t, *J* = 6.9 Hz, 2H), 1.56 (s, 9H). <sup>13</sup>C  
720 NMR (126 MHz, CDCl<sub>3</sub>) δ 165.30, 154.57, 152.45, 148.51, 133.71, 132.88, 130.63, 129.94, 128.96,  
721 127.32, 125.17, 116.11, 115.68, 113.70, 82.06, 40.92, 34.93, 28.25. HRMS (ESI) *m/z* calculated  
722 for C<sub>24</sub>H<sub>26</sub>N<sub>2</sub>O<sub>4</sub>S [M+H]<sup>+</sup>: 439.1655; found [M+H]<sup>+</sup>: 439.1651.

723

724 **BDA-12: 2-(isopentylamino)-N-phenethyl-5-phenylthiophene-3-carboxamide**

725 The product was synthesized according to procedure **step 6** and purified by column  
726 chromatography and afforded as yellow solid (231 mg, 75% yield), M.P.= 172 - 175 °C;

727 <sup>1</sup>H NMR (500 MHz, CDCl<sub>3</sub>) δ 8.18 (t, *J* = 5.6 Hz, 1H), 7.43 (d, *J* = 8.2 Hz, 2H), 7.35 (dt, *J* = 11.7,  
728 8.0 Hz, 4H), 7.28 (d, *J* = 2.8 Hz, 3H), 7.20 (t, *J* = 7.4 Hz, 1H), 6.91 (s, 1H), 5.69 (t, *J* = 6.0 Hz,  
729 1H), 3.67 (d, *J* = 6.0 Hz, 2H), 3.39 – 3.17 (m, 2H), 2.93 (t, *J* = 6.9 Hz, 2H), 1.79 (dt, *J* = 13.4, 6.7  
730 Hz, 1H), 1.64 (q, *J* = 7.0 Hz, 2H), 0.99 (d, *J* = 6.6 Hz, 6H). <sup>13</sup>C NMR (126 MHz, CDCl<sub>3</sub>) δ 167.77,  
731 166.19, 139.20, 128.89, 128.68, 126.53, 124.13, 118.56, 45.94, 40.46, 38.08, 36.22, 25.74, 22.46,  
732 0.01. HRMS (ESI) *m/z* calculated for C<sub>24</sub>H<sub>28</sub>N<sub>2</sub>OS [M+H]<sup>+</sup>: 393.1967; found [M+H]<sup>+</sup>: 393.1963.

733

734 **BDA-13: 2-(((1H-imidazol-2-yl)methyl)amino)-N-phenethyl-5-phenylthiophene-3-  
735 carboxamide**

736 The product was synthesized according to procedure **step 6** and purified by column  
737 chromatography and afforded as yellow solid (131 mg, 75% yield), M.P.= 185 - 189 °C;

738 <sup>1</sup>H NMR (500 MHz, CDCl<sub>3</sub>) δ 9.05 (s, 1H), 8.33 (d, *J* = 8.8 Hz, 2H), 7.83 (s, 1H), 7.65 – 7.55 (m,  
739 2H), 7.42 – 7.31 (m, 8H), 7.29 (s, 2H), 7.02 (s, 1H), 3.83 (q, *J* = 6.1 Hz, 2H), 2.97 (t, *J* = 6.1 Hz,  
740 2H). <sup>13</sup>C NMR (126 MHz, CDCl<sub>3</sub>) δ 162.54, 151.01, 146.86, 143.71, 140.09, 138.45, 133.10,  
741 131.97, 129.21, 129.05, 128.88, 128.72, 128.47, 126.60, 125.72, 125.09, 124.65, 39.95, 35.65.  
742 HRMS (ESI) *m/z* calculated for C<sub>23</sub>H<sub>22</sub>N<sub>4</sub>OS [M+H]<sup>+</sup>: 403.1529; found [M+H]<sup>+</sup>: 403.1525.

743



744 **BDA-14: tert-butyl (3-((2-hydroxyethyl)carbamoyl)-5-phenylthiophen-2-yl)carbamate**

745 The product was synthesized according to procedure **step 4** and purified by column  
746 chromatography and afforded as brown solid (165 mg, 61% yield), M.P.= 166 - 171 °C;

747 <sup>1</sup>H NMR (500 MHz, CDCl<sub>3</sub>) δ 10.88 (s, 1H), 9.95 (s, 1H), 7.58 (dd, *J* = 14.0, 7.3 Hz, 2H), 7.45 (s,  
748 1H), 7.38 (q, *J* = 7.8 Hz, 2H), 7.29 (s, 1H), 7.14 (s, 1H), 6.49 (t, *J* = 5.6 Hz, 1H), 3.89 (t, *J* = 5.0  
749 Hz, 2H), 3.64 (q, *J* = 5.6 Hz, 2H), 1.57 (s, 9H). <sup>13</sup>C NMR (126 MHz, CDCl<sub>3</sub>) δ 166.18, 148.84,  
750 133.72, 133.61, 132.96, 128.97, 127.39, 127.35, 125.25, 125.17, 119.77, 116.31, 113.35, 82.09,  
751 62.43, 42.24, 28.25, 28.22. HRMS (ESI) *m/z* calculated for C<sub>18</sub>H<sub>22</sub>N<sub>2</sub>O<sub>4</sub>S [M+H]<sup>+</sup>: 363.1379;  
752 found [M+H]<sup>+</sup>: 363.1373.

753  
754 **BDA-15: 2-(3-(benzo[d][1,3]dioxol-5-yl)propanamido)-N-phenethyl-5-phenylthiophene-3-**  
755 **carboxamide**

756 The product was synthesized according to procedure **step 7** and purified by column  
757 chromatography and afforded as yellow solid (318 mg, 64% yield), M.P.= 188 - 190 °C;

758 <sup>1</sup>H NMR (500 MHz, CDCl<sub>3</sub>) δ 11.97 (s, 1H), 7.57 – 7.53 (m, 2H), 7.38 (q, *J* = 7.5 Hz, 4H), 7.31  
759 (d, *J* = 7.6 Hz, 2H), 7.28 – 7.26 (m, 2H), 6.97 (s, 1H), 6.76 (d, *J* = 7.6 Hz, 2H), 6.72 (dd, *J* = 7.9,  
760 1.7 Hz, 1H), 6.05 (t, *J* = 6.0 Hz, 1H), 5.94 (s, 2H), 3.71 (q, *J* = 6.9 Hz, 2H), 3.04 (t, *J* = 7.7 Hz,  
761 2H), 2.96 (t, *J* = 6.9 Hz, 2H), 2.80 (t, *J* = 7.8 Hz, 2H). <sup>13</sup>C NMR (126 MHz, CDCl<sub>3</sub>) δ 169.22,  
762 165.29, 147.71, 146.19, 146.03, 138.63, 134.29, 134.07, 133.68, 129.01, 128.83, 127.54, 126.79,  
763 125.47, 121.22, 115.60, 115.08, 108.88, 108.35, 100.86, 40.71, 38.64, 35.81, 30.92. HRMS (ESI)  
764 *m/z* calculated for C<sub>29</sub>H<sub>26</sub>N<sub>2</sub>O<sub>4</sub>S [M+H]<sup>+</sup>: 499.1667; found [M+H]<sup>+</sup>: 499.1662.

765  
766 **BDA-16: tert-butyl (3-((2-hydroxy-2-phenylethyl)carbamoyl)-5-phenylthiophen-2-**  
767 **yl)carbamate**

768 The product was synthesized according to procedure **step 4** and purified by column  
769 chromatography and afforded as brown solid (235 mg, 71% yield), M.P.= 191 - 194 °C;

770 <sup>1</sup>H NMR (500 MHz, DMSO- *d*<sub>6</sub>) δ 11.32 (s, 1H), 8.57 (s, 1H), 7.95 (s, 1H), 7.57 (d, *J* = 7.1 Hz,  
771 2H), 7.44 (t, *J* = 7.8 Hz, 2H), 7.40 (d, *J* = 6.8 Hz, 2H), 7.36 (t, *J* = 7.6 Hz, 2H), 7.29 (dt, *J* = 12.3,  
772 7.3 Hz, 2H), 5.60 (d, *J* = 4.4 Hz, 1H), 4.83 – 4.73 (m, 1H), 3.56 – 3.48 (m, 1H), 3.26 (ddd, *J* =  
773 13.6, 8.5, 5.4 Hz, 1H), 1.52 (s, 9H). <sup>13</sup>C NMR (126 MHz, DMSO- *d*<sub>6</sub>) δ 165.34, 151.86, 147.08,  
774 144.16, 134.02, 131.35, 129.71, 128.60, 127.69, 127.60, 126.43, 125.02, 124.83, 119.91, 119.75,

775 115.16, 82.11, 71.59, 47.72, 28.19. HRMS (ESI)  $m/z$  calculated for  $C_{24}H_{26}N_2O_4S$   $[M+H]^+$ :  
776 439.1637; found  $[M+H]^+$ : 439.1634.

777  
778 **BDA-17: tert-butyl (2-((3-((4-hydroxyphenethyl)carbamoyl)-5-phenylthiophen-2-yl)amino)-**  
779 **2-oxoethyl)carbamate**

780 The product was synthesized according to procedure **step 4** and purified by column  
781 chromatography and afforded as brown solid (215 mg, 86% yield), M.P.= 181 - 184 °C;

782  $^1H$  NMR (500 MHz,  $CDCl_3$ )  $\delta$  7.41 (d,  $J$  = 6.9 Hz, 2H), 7.33 (t,  $J$  = 7.8 Hz, 2H), 7.25 – 7.18 (m,  
783 3H), 7.06 (d,  $J$  = 8.5 Hz, 2H), 6.91 (s, 1H), 6.25 (s, 2H), 5.98 (t,  $J$  = 6.1 Hz, 1H), 5.16 (t,  $J$  = 5.9  
784 Hz, 1H), 4.19 (d,  $J$  = 5.8 Hz, 2H), 3.63 (q,  $J$  = 6.9 Hz, 2H), 2.90 (t,  $J$  = 6.9 Hz, 2H), 1.50 (s, 9H).

785  $^{13}C$  NMR (126 MHz,  $CDCl_3$ )  $\delta$  169.34, 165.88, 160.41, 155.78, 148.88, 137.17, 133.92, 129.94,  
786 128.88, 126.64, 125.29, 124.65, 121.49, 118.09, 115.60, 109.64, 80.33, 42.63, 40.53, 35.48, 28.34.

787 HRMS (ESI)  $m/z$  calculated for  $C_{26}H_{29}N_3O_5S$   $[M+H]^+$ : 496.1816; found  $[M+H]^+$ : 496.1813.

788  
789 **BDA-18: tert-butyl (3-((2-methoxyphenethyl)carbamoyl)-5-phenylthiophen-2-yl)carbamate**

790 The product was synthesized according to procedure **step 4** and purified by column  
791 chromatography and afforded as yellow solid (157 mg, 87% yield), M.P.= 179 - 182 °C;

792  $^1H$  NMR (500 MHz,  $CDCl_3$ )  $\delta$  11.01 (s, 1H), 7.55 (dd,  $J$  = 8.4, 1.3 Hz, 2H), 7.38 (t,  $J$  = 7.7 Hz,  
793 2H), 7.30 – 7.29 (m, 1H), 7.28 – 7.26 (m, 1H), 7.21 (dd,  $J$  = 7.3, 1.8 Hz, 1H), 7.01 – 6.90 (m, 3H),  
794 6.39 (s, 1H), 3.92 (s, 3H), 3.70 – 3.59 (m, 2H), 2.98 (t,  $J$  = 6.5 Hz, 2H), 1.56 (s, 9H).  $^{13}C$  NMR

795 (126 MHz,  $CDCl_3$ )  $\delta$  165.29, 157.37, 152.49, 148.21, 133.93, 132.62, 130.83, 129.00, 128.16,  
796 127.49, 127.24, 125.09, 121.12, 116.31, 113.98, 110.66, 81.88, 55.59, 40.44, 30.00, 28.26. HRMS

797 (ESI)  $m/z$  calculated for  $C_{25}H_{28}N_2O_4S$   $[M+H]^+$ : 453.1829; found  $[M+H]^+$ : 453.1826.

798  
799 **BDA-19: N-(4-hydroxyphenethyl)-2-(isopentylamino)-5-phenylthiophene-3-carboxamide**

800 The product was synthesized according to procedure **step 6** and purified by column  
801 chromatography and afforded as yellow solid (146 mg, 75% yield), M.P.= 188 - 190 °C;

802  $^1H$  NMR (500 MHz,  $CDCl_3$ )  $\delta$  9.07 (s, 1H), 7.70 (s, 1H), 7.61 – 7.52 (m, 2H), 7.37 (hept,  $J$  = 7.8  
803 Hz, 3H), 7.29 (s, 1H), 7.15 – 7.06 (m, 2H), 6.86 (dd,  $J$  = 14.8, 8.5 Hz, 2H), 5.53 (s, 1H), 3.76 –  
804 3.66 (m, 2H), 3.04 – 2.61 (m, 4H), 1.53 – 1.44 (m, 1H), 1.38 – 1.15 (m, 2H), 0.87 (d,  $J$  = 6.6 Hz,

805 6H).  $^{13}C$  NMR (126 MHz,  $CDCl_3$ )  $\delta$  163.26, 157.62, 154.71, 133.95, 131.10, 129.94, 129.70,

806 129.17, 128.88, 127.66, 125.43, 122.25, 115.56, 57.71, 40.19, 35.79, 34.56, 26.42, 22.60. HRMS  
807 (ESI) m/z calculated for C<sub>24</sub>H<sub>28</sub>N<sub>2</sub>O<sub>2</sub>S [M+H]<sup>+</sup>: 409.1954; found [M+H]<sup>+</sup>: 409.1951.

808  
809 **BDA-20: tert-butyl (3-((2-(cyclohex-1-en-1-yl)ethyl)carbamoyl)-5-phenylthiophen-2-  
810 yl)carbamate**

811 The product was synthesized according to procedure **step 4** and purified by column  
812 chromatography and afforded as yellow solid (152 mg, 62% yield), M.P.= 174 - 176 °C;

813 <sup>1</sup>H NMR (500 MHz, CDCl<sub>3</sub>) δ 10.99 (s, 1H), 7.55 (d, *J* = 7.1 Hz, 2H), 7.38 (t, *J* = 7.8 Hz, 2H),  
814 7.28 (t, *J* = 7.4 Hz, 1H), 7.04 (s, 1H), 6.01 (t, *J* = 5.5 Hz, 1H), 5.58 (s, 1H), 3.55 – 3.45 (m, 2H),  
815 2.27 (t, *J* = 7.5 Hz, 2H), 2.02 (d, *J* = 29.3 Hz, 4H), 1.70 – 1.65 (m, 2H), 1.63 – 1.58 (m, 2H), 1.55  
816 (s, 9H). <sup>13</sup>C NMR (126 MHz, CDCl<sub>3</sub>) δ 165.13, 152.47, 148.30, 134.72, 133.82, 132.77, 128.99,  
817 127.30, 125.15, 123.96, 116.13, 113.87, 81.92, 37.63, 37.09, 28.25, 27.93, 25.33, 22.83, 22.37.  
818 HRMS (ESI) m/z calculated for C<sub>24</sub>H<sub>30</sub>N<sub>2</sub>O<sub>4</sub>S [M+H]<sup>+</sup>: 427.2079; found [M+H]<sup>+</sup>: 427.2074.

819  
820 **BDA-21: tert-butyl (5-phenyl-3-((4-(trifluoromethyl)phenethyl)carbamoyl)  
821 thiophen-2-yl)carbamate**

822 The product was synthesized according to procedure **step 4** and purified by column  
823 chromatography and afforded as yellow solid (169 mg, 89% yield), M.P.= 180 - 183 °C;

824 <sup>1</sup>H NMR (500 MHz, CDCl<sub>3</sub>) δ 10.94 (s, 1H), 7.61 (d, *J* = 8.2 Hz, 2H), 7.53 (d, *J* = 7.4 Hz, 2H),  
825 7.37 (t, *J* = 6.7 Hz, 4H), 7.31 – 7.27 (m, 1H), 6.99 (s, 1H), 6.06 (t, *J* = 6.1 Hz, 1H), 3.70 (q, *J* = 6.9  
826 Hz, 2H), 3.02 (t, *J* = 7.1 Hz, 2H), 1.57 (s, 9H). <sup>13</sup>C NMR (126 MHz, CDCl<sub>3</sub>) δ 165.34, 152.44,  
827 148.74, 142.93, 133.65, 132.96, 129.18, 129.00, 127.40, 125.72, 125.69, 125.66, 125.63, 125.16,  
828 116.01, 113.45, 82.12, 40.56, 35.83, 28.25. HRMS (ESI) m/z calculated for C<sub>25</sub>H<sub>25</sub>F<sub>3</sub>N<sub>2</sub>O<sub>3</sub>S  
829 [M+H]<sup>+</sup>: 491.1538; found [M+H]<sup>+</sup>: 491.1532.

830  
831 **BDA-22: tert-butyl (3-((4-bromophenethyl)carbamoyl)-5-phenylthiophen-2-yl)carbamate**

832 The product was synthesized according to procedure **step 4** and purified by column  
833 chromatography and afforded as yellow solid (181 mg, 92% yield), M.P.= 190 - 192 °C;

834 <sup>1</sup>H NMR (500 MHz, CDCl<sub>3</sub>) δ 10.95 (s, 1H), 7.53 (d, *J* = 8.0 Hz, 2H), 7.47 (d, *J* = 8.4 Hz, 2H),  
835 7.37 (t, *J* = 7.7 Hz, 2H), 7.28 (t, *J* = 7.4 Hz, 1H), 7.13 (d, *J* = 8.4 Hz, 2H), 6.98 (s, 1H), 6.03 (t, *J* =  
836 6.0 Hz, 1H), 3.66 (q, *J* = 7.1 Hz, 2H), 2.91 (t, *J* = 7.0 Hz, 2H), 1.57 (s, 9H). <sup>13</sup>C NMR (126 MHz,

837 CDCl<sub>3</sub>) δ 165.29, 152.44, 148.67, 137.75, 133.68, 132.91, 131.84, 130.57, 129.00, 127.37, 125.18,  
838 120.56, 116.05, 113.52, 82.07, 40.61, 35.38, 28.26. HRMS (ESI) m/z calculated for  
839 C<sub>24</sub>H<sub>25</sub>BrN<sub>2</sub>O<sub>3</sub>S [M+H]<sup>+</sup>: 501.0878; found [M+H]<sup>+</sup>: 501.0875.

840

841 **BDA-23: tert-butyl (3-((4-methylphenethyl)carbamoyl)-5-phenylthiophen-2-yl)carbamate**

842 The product was synthesized according to procedure **step 4** and purified by column  
843 chromatography and afforded as yellow solid (248 mg, 88% yield), M.P.= 170 - 173 °C;

844 <sup>1</sup>H NMR (500 MHz, CDCl<sub>3</sub>) δ 10.98 (s, 1H), 7.54 (d, *J* = 7.1 Hz, 2H), 7.38 (t, *J* = 7.7 Hz, 2H),  
845 7.30 – 7.26 (m, 1H), 7.20 – 7.14 (m, 4H), 6.96 (s, 1H), 5.97 (s, 1H), 3.68 (d, *J* = 5.8 Hz, 2H), 2.92  
846 (t, *J* = 6.9 Hz, 2H), 2.37 (s, 3H), 1.57 (s, 9H). <sup>13</sup>C NMR (126 MHz, CDCl<sub>3</sub>) δ 165.21, 152.47,  
847 148.52, 136.30, 135.63, 133.77, 132.77, 129.49, 128.97, 128.73, 127.30, 125.16, 116.13, 113.70,  
848 81.98, 40.79, 35.42, 28.27, 21.09. HRMS (ESI) m/z calculated for C<sub>25</sub>H<sub>28</sub>N<sub>2</sub>O<sub>3</sub>S [M+H]<sup>+</sup>: 437.1869;  
849 found [M+H]<sup>+</sup>: 437.1863.

850

851 **BDA-24: tert-butyl (3-((3-methoxyphenethyl)carbamoyl)-5-phenylthiophen-2-yl)carbamate**

852 The product was synthesized according to procedure **step 4** and purified by column  
853 chromatography and afforded as yellow solid (261 mg, 90% yield), M.P.= 175 - 177 °C;

854 <sup>1</sup>H NMR (500 MHz, CDCl<sub>3</sub>) δ 10.99 (s, 1H), 7.52 (d, *J* = 7.7 Hz, 2H), 7.36 (t, *J* = 7.7 Hz, 2H),  
855 7.29 (d, *J* = 7.9 Hz, 1H), 7.27 (d, *J* = 2.4 Hz, 1H), 7.00 (s, 1H), 6.87 – 6.79 (m, 3H), 6.11 (t, *J* = 6.0  
856 Hz, 1H), 3.81 (s, 3H), 3.69 (q, *J* = 6.9 Hz, 2H), 2.92 (t, *J* = 7.0 Hz, 2H), 1.56 (s, 9H). <sup>13</sup>C NMR  
857 (126 MHz, CDCl<sub>3</sub>) δ 165.25, 159.91, 152.46, 148.48, 140.36, 133.74, 132.80, 129.83, 128.97,  
858 127.31, 125.12, 121.14, 116.22, 114.51, 113.75, 112.05, 82.01, 55.20, 40.59, 35.92, 28.26. HRMS  
859 (ESI) m/z calculated for C<sub>25</sub>H<sub>28</sub>N<sub>2</sub>O<sub>4</sub>S [M+H]<sup>+</sup>: 453.1836; found [M+H]<sup>+</sup>: 453.1831.

860

861 **BDA-25: tert-butyl (3-((3,4-dihydroxyphenethyl)carbamoyl)-5-phenylthiophen-2-yl)carbamate**

863 The product was synthesized according to procedure **step 4** and purified by column  
864 chromatography and afforded as yellow solid (161 mg, 63% yield), M.P.= 197 - 201 °C;

865 <sup>1</sup>H NMR (500 MHz, CDCl<sub>3</sub>) δ 10.86 (s, 1H), 7.50 (d, *J* = 7.6 Hz, 2H), 7.35 (t, *J* = 7.7 Hz, 2H),  
866 7.26 (t, *J* = 7.3 Hz, 1H), 6.95 (s, 1H), 6.85 (d, *J* = 7.9 Hz, 1H), 6.77 (d, *J* = 2.2 Hz, 1H), 6.65 (d, *J*  
867 = 8.0 Hz, 1H), 6.07 (t, *J* = 5.9 Hz, 1H), 3.60 (q, *J* = 6.9 Hz, 2H), 2.79 (t, *J* = 6.9 Hz, 2H), 1.55 (s,

868 9H). <sup>13</sup>C NMR (126 MHz, CDCl<sub>3</sub>) δ 165.37, 152.44, 148.44, 144.00, 142.57, 133.59, 132.95,  
869 131.36, 128.97, 127.37, 125.13, 121.10, 116.13, 115.67, 115.57, 113.65, 82.21, 40.85, 35.08, 28.25.  
870 HRMS (ESI) m/z calculated for C<sub>24</sub>H<sub>26</sub>N<sub>2</sub>O<sub>5</sub>S [M+H]<sup>+</sup>: 455.1646; found [M+H]<sup>+</sup>: 455.1641.

871

872 **BDA-26: tert-butyl (5-phenyl-3-((3-phenylpropyl)carbamoyl)thiophen-2-yl)carbamate**

873 The product was synthesized according to procedure **step 4** and purified by column  
874 chromatography and afforded as yellow solid (238 mg, 83% yield), M.P.= 176 - 179 °C;

875 <sup>1</sup>H NMR (500 MHz, CDCl<sub>3</sub>) δ 10.99 (s, 1H), 7.55 (d, *J* = 7.1 Hz, 2H), 7.39 (t, *J* = 7.7 Hz, 2H),  
876 7.34 (t, *J* = 7.6 Hz, 2H), 7.29 (d, *J* = 6.8 Hz, 1H), 7.24 (dd, *J* = 11.7, 7.1 Hz, 3H), 6.85 (s, 1H), 5.86  
877 (t, *J* = 5.8 Hz, 1H), 3.56 – 3.45 (m, 2H), 2.77 (t, *J* = 7.4 Hz, 2H), 2.01 (p, *J* = 7.0 Hz, 2H), 1.55 (s,  
878 9H). <sup>13</sup>C NMR (126 MHz, CDCl<sub>3</sub>) δ 165.18, 152.46, 148.37, 141.42, 133.78, 132.69, 128.95,  
879 128.68, 128.47, 127.29, 126.25, 125.17, 116.17, 113.65, 81.94, 39.42, 33.77, 31.06, 28.26. HRMS  
880 (ESI) m/z calculated for C<sub>25</sub>H<sub>28</sub>N<sub>2</sub>O<sub>5</sub>S [M+H]<sup>+</sup>: 437.1867; found [M+H]<sup>+</sup>: 437.1862.

881

882 **BDA-27: tert-butyl (3-((2-oxo-2-phenylethyl)carbamoyl)-5-phenylthiophen-2-yl)carbamate**

883 The product was synthesized according to procedure **step 4** and purified by column  
884 chromatography and afforded as yellow solid (188 mg, 74% yield), M.P.= 184 - 187 °C;

885 <sup>1</sup>H NMR (500 MHz, CDCl<sub>3</sub>) δ 10.89 (s, 1H), 8.06 (d, *J* = 8.0 Hz, 2H), 7.73 – 7.66 (m, 1H), 7.63  
886 (d, *J* = 7.3 Hz, 2H), 7.57 (t, *J* = 7.8 Hz, 2H), 7.41 (t, *J* = 7.8 Hz, 2H), 7.31 (d, *J* = 10.1 Hz, 2H),  
887 7.08 (t, *J* = 4.3 Hz, 1H), 4.95 (d, *J* = 4.3 Hz, 2H), 1.57 (s, 9H). <sup>13</sup>C NMR (126 MHz, CDCl<sub>3</sub>) δ  
888 193.99, 165.19, 152.39, 148.96, 134.43, 134.25, 133.72, 133.04, 129.09, 129.01, 128.01, 127.38,  
889 125.27, 116.49, 113.33, 82.05, 46.24, 28.26. HRMS (ESI) m/z calculated for C<sub>24</sub>H<sub>24</sub>N<sub>2</sub>O<sub>4</sub>S [M+H]<sup>+</sup>:  
890 437.1545; found [M+H]<sup>+</sup>: 437.1540.

891

892 **BDA-28: tert-butyl (3-((4-fluorophenethyl)carbamoyl)-5-phenylthiophen-2-yl)carbamate**

893 The product was synthesized according to procedure **step 4** and purified by column  
894 chromatography and afforded as yellow solid (164 mg, 90% yield), M.P.= 181 - 184 °C;

895 <sup>1</sup>H NMR (500 MHz, CDCl<sub>3</sub>) δ 10.96 (s, 1H), 7.53 (d, *J* = 7.1 Hz, 2H), 7.37 (t, *J* = 7.7 Hz, 2H),  
896 7.28 (t, *J* = 7.4 Hz, 1H), 7.21 (dd, *J* = 8.7, 5.4 Hz, 2H), 7.04 (t, *J* = 8.7 Hz, 2H), 6.99 (s, 1H), 6.05  
897 (t, *J* = 6.1 Hz, 1H), 3.70 – 3.62 (m, 2H), 2.92 (t, *J* = 7.1 Hz, 2H), 1.56 (s, 9H). <sup>13</sup>C NMR (126 MHz,  
898 CDCl<sub>3</sub>) δ 165.28, 162.71, 160.77, 152.45, 148.61, 134.42, 134.40, 133.70, 132.88, 130.27, 130.21,

899 129.00, 127.36, 125.16, 116.07, 115.67, 115.50, 113.59, 82.05, 40.85, 35.14, 28.26. HRMS (ESI)  
900 m/z calculated for C<sub>24</sub>H<sub>25</sub>N<sub>2</sub>O<sub>3</sub>S [M+H]<sup>+</sup>: 441.1667; found [M+H]<sup>+</sup>: 441.1662.

901  
902 **BDA-29: tert-butyl (3-((4-methoxyphenethyl)carbamoyl)-5-phenylthiophen-2-yl)carbamate**  
903 The product was synthesized according to procedure **step 4** and purified by column  
904 chromatography and afforded as yellow solid (178 mg, 87% yield), M.P.= 178 - 181 °C;  
905 <sup>1</sup>H NMR (500 MHz, CDCl<sub>3</sub>) δ 10.97 (s, 1H), 7.54 (d, *J* = 8.0 Hz, 2H), 7.37 (t, *J* = 7.7 Hz, 2H),  
906 7.28 (d, *J* = 4.1 Hz, 1H), 7.19 (d, *J* = 8.7 Hz, 2H), 6.95 (s, 1H), 6.91 (d, *J* = 8.7 Hz, 2H), 5.94 (s,  
907 1H), 3.83 (s, 3H), 3.70 – 3.61 (m, 2H), 2.90 (t, *J* = 6.9 Hz, 2H), 1.57 (s, 9H). <sup>13</sup>C NMR (126 MHz,  
908 CDCl<sub>3</sub>) δ 165.20, 158.44, 148.55, 133.78, 132.82, 130.70, 129.79, 128.96, 127.31, 125.18, 116.08,  
909 114.21, 113.70, 81.97, 55.31, 40.86, 34.96, 28.26. HRMS (ESI) m/z calculated for C<sub>25</sub>H<sub>28</sub>N<sub>2</sub>O<sub>4</sub>S  
910 [M+H]<sup>+</sup>: 453.1864; found [M+H]<sup>+</sup>: 453.1863.

911  
912 **BDA-30: tert-butyl (3-((4-hydroxybenzyl)carbamoyl)-5-phenylthiophen-2-yl)carbamate**  
913 The product was synthesized according to procedure **step 4** and purified by column  
914 chromatography and afforded as yellow solid (185 mg, 86% yield), M.P.= 175 - 177 °C;  
915 <sup>1</sup>H NMR (500 MHz, CDCl<sub>3</sub>) δ 10.97 (s, 1H), 7.55 (d, *J* = 7.1 Hz, 2H), 7.36 (t, *J* = 7.7 Hz, 2H),  
916 7.29 (s, 1H), 7.26 (d, *J* = 8.5 Hz, 2H), 7.07 (s, 1H), 6.86 (d, *J* = 8.7 Hz, 2H), 6.15 (d, *J* = 5.8 Hz,  
917 1H), 4.94 (s, 1H), 4.56 (d, *J* = 5.7 Hz, 2H), 1.57 (s, 9H). <sup>13</sup>C NMR (126 MHz, CDCl<sub>3</sub>) δ 165.05,  
918 155.22, 148.78, 133.71, 130.15, 129.41, 128.96, 127.33, 125.18, 116.14, 115.69, 113.44, 82.04,  
919 42.99, 28.26. HRMS (ESI) m/z calculated for C<sub>23</sub>H<sub>24</sub>N<sub>2</sub>O<sub>4</sub>S [M+H]<sup>+</sup>: 425.18548; found [M+H]<sup>+</sup>:  
920 425.18545.

921  
922 **BDA-31: tert-butyl (5-phenyl-3-(phenylcarbamoyl)thiophen-2-yl)carbamate**  
923 The product was synthesized according to procedure **step 4** and purified by column  
924 chromatography and afforded as yellow solid (126 mg, 64%), M.P.= 169 - 175 °C; <sup>1</sup>H NMR (500  
925 MHz, CDCl<sub>3</sub>) δ 10.88 (s, 1H), 7.65 (s, 1H), 7.62 – 7.58 (m, 4H), 7.40 (td, *J* = 7.8, 6.0 Hz, 4H), 7.31  
926 (dt, *J* = 8.0, 1.7 Hz, 1H), 7.24 (s, 1H), 7.20 (tt, *J* = 7.4, 1.3 Hz, 1H), 1.57 (s, 9H). <sup>13</sup>C NMR (126  
927 MHz, CDCl<sub>3</sub>) δ 163.58, 152.41, 149.65, 137.24, 133.63, 133.15, 129.13, 129.02, 127.48, 125.28,  
928 124.87, 120.93, 116.05, 113.79, 82.24, 28.24. HRMS (ESI) m/z calculated for C<sub>22</sub>H<sub>22</sub>N<sub>2</sub>O<sub>3</sub>S  
929 [M+H]<sup>+</sup>: 395.1418; found [M+H]<sup>+</sup>: 395.1425.

930

931 **BDA-34: tert-butyl (3-(benzylcarbamoyl)-5-phenylthiophen-2-yl)carbamate**

932 The product was synthesized according to procedure **step 4** and purified by column  
933 chromatography and afforded as brown solid (135 mg, 66%), M.P.= 171 - 177 °C; <sup>1</sup>H NMR (500  
934 MHz, CDCl<sub>3</sub>) δ 10.98 (s, 1H), 7.55 (d, J = 7.1 Hz, 2H), 7.41 – 7.33 (m, 6H), 7.27 (t, J = 7.4 Hz,  
935 1H), 7.11 (s, 1H), 6.29 (t, J = 5.8 Hz, 1H), 4.64 (d, J = 5.8 Hz, 2H), 1.57 (s, 9H). <sup>13</sup>C NMR (126  
936 MHz, CDCl<sub>3</sub>) δ 165.14, 152.45, 148.83, 137.99, 133.73, 132.93, 128.96, 128.88, 127.79, 127.74,  
937 127.32, 125.18, 116.21, 113.45, 82.04, 43.50, 28.26. HRMS (ESI) m/z calculated for C<sub>23</sub>H<sub>24</sub>N<sub>2</sub>O<sub>3</sub>S  
938 [M+H]<sup>+</sup>: 409.1523; found [M+H]<sup>+</sup>: 409.1528.

939 **BDA-37: Tert-butyl (3-((3-fluoro-4-morpholinophenyl)carbamoyl)-5-phenylthiophen-2-  
940 yl)carbamate**

941 The product was synthesized according to procedure **step 4** and purified by column  
942 chromatography and afforded as brown solid (185 mg, 74%), M.P.= 173 - 178 °C; <sup>1</sup>H NMR (500  
943 MHz, CDCl<sub>3</sub>) δ 10.85 (s, 1H), 7.93 (s, 1H), 7.52 (dd, J = 8.4, 1.3 Hz, 2H), 7.47 (dd, J = 13.9, 2.5  
944 Hz, 1H), 7.34 (t, J = 7.7 Hz, 2H), 7.26 (d, J = 6.0 Hz, 2H), 7.17 (dd, J = 8.6, 2.3 Hz, 1H), 6.87 (t, J  
945 = 9.1 Hz, 1H), 3.90 – 3.84 (m, 4H), 3.09 – 3.00 (m, 4H), 1.55 (s, 9H). <sup>13</sup>C NMR (126 MHz, CDCl<sub>3</sub>)  
946 δ 163.62, 156.28, 154.33, 152.39, 149.44, 136.92, 136.85, 133.55, 132.94, 132.34, 132.26, 128.99,  
947 127.43, 125.12, 118.68, 118.64, 117.01, 116.99, 116.39, 113.78, 110.22, 110.02, 82.34, 66.98,  
948 51.00, 50.98, 28.22. HRMS (ESI) m/z calculated for C<sub>26</sub>H<sub>28</sub>FN<sub>3</sub>O<sub>4</sub>S [M+H]<sup>+</sup>: 498.1835; found  
949 [M+H]<sup>+</sup>: 498.1838.

950

951 **BDA-38: Tert-butyl (3-((1-benzylpiperidin-4-yl)carbamoyl)-5-phenylthiophen-2-yl)  
952 carbamate**

953 The product was synthesized according to procedure **step 4** and purified by column  
954 chromatography and afforded as brown solid (196 mg, 80%), M.P.= 172 - 176 °C; <sup>1</sup>H NMR (500  
955 MHz, CDCl<sub>3</sub>) δ 11.01 (s, 1H), 7.57 (d, J = 7.7 Hz, 2H), 7.41 – 7.32 (m, 6H), 7.32 – 7.24 (m, 2H),  
956 7.17 (s, 1H), 6.11 (d, J = 7.9 Hz, 1H), 4.07 – 3.93 (m, 1H), 3.59 (s, 2H), 2.95 (d, J = 12.1 Hz, 2H),  
957 2.21 (t, J = 11.7 Hz, 2H), 2.01 (d, J = 9.1 Hz, 2H), 1.74 – 1.62 (m, 2H), 1.55 (s, 9H). <sup>13</sup>C NMR  
958 (126 MHz, CDCl<sub>3</sub>) δ 164.76, 152.42, 148.53, 137.36, 133.79, 132.74, 129.34, 128.95, 128.35,

127.37, 127.28, 125.16, 116.51, 113.78, 81.93, 62.71, 52.19, 46.70, 31.96, 28.25. HRMS (ESI) m/z  
calculated for C<sub>28</sub>H<sub>33</sub>N<sub>3</sub>O<sub>3</sub>S [M+H]<sup>+</sup>: 492.2214; found [M+H]<sup>+</sup>: 492.2219.

**BDA-39: Tert-butyl (3-((2,2-diphenylethyl)carbamoyl)-5-phenylthiophen-2-yl) carbamate**

The product was synthesized according to procedure **step 4** and purified by column chromatography and afforded as yellow solid (202 mg, 81%), M.P.= 170 - 174 °C; <sup>1</sup>H NMR (500 MHz, CDCl<sub>3</sub>) δ 10.95 (s, 1H), 7.48 (dd, J = 8.4, 1.3 Hz, 2H), 7.40 – 7.33 (m, 6H), 7.33 – 7.29 (m, 5H), 7.29 – 7.25 (m, 2H), 6.79 (s, 1H), 5.94 (t, J = 5.9 Hz, 1H), 4.08 (dd, J = 7.9, 5.8 Hz, 2H), 1.57 (s, 9H). <sup>13</sup>C NMR (126 MHz, CDCl<sub>3</sub>) δ 165.19, 152.44, 148.59, 141.78, 133.71, 132.76, 128.95, 128.87, 128.10, 127.31, 127.03, 125.16, 116.09, 113.66, 82.02, 50.59, 43.79, 28.27. HRMS (ESI) m/z calculated for C<sub>30</sub>H<sub>30</sub>N<sub>2</sub>O<sub>3</sub>S [M+H]<sup>+</sup>: 499.2042; found [M+H]<sup>+</sup>: 499.2046.

**BDA-49: Tert-butyl (3-((4-hydroxyphenethyl)carbamoyl)-4-methyl-5phenylthiophen-2-yl)carbamate**

The product was synthesized according to procedure **step 4** and purified by column chromatography and afforded as yellow solid (192 mg, 85%), M.P.= 172 - 177 °C; <sup>1</sup>H NMR (500 MHz, CDCl<sub>3</sub>) δ 7.42 – 7.35 (m, 2H), 7.33 – 7.30 (m, 2H), 7.29 (t, J = 2.9 Hz, 1H), 7.27 (d, J = 2.2 Hz, 2H), 7.18 – 7.09 (m, 2H), 5.96 (s, 1H), 5.83 (t, J = 5.4 Hz, 1H), 3.71 (q, J = 6.9 Hz, 2H), 2.95 (t, J = 6.9 Hz, 2H), 2.13 (s, 3H), 1.58 (s, 9H). <sup>13</sup>C NMR (126 MHz, CDCl<sub>3</sub>) δ 166.66, 159.42, 151.96, 149.78, 136.60, 134.13, 129.76, 129.68, 128.48, 127.61, 126.97, 121.57, 120.96, 111.49, 83.60, 40.42, 35.00, 27.72, 15.96. HRMS (ESI) m/z calculated for C<sub>25</sub>H<sub>28</sub>N<sub>2</sub>O<sub>4</sub>S [M+H]<sup>+</sup>: 453.1835; found [M+H]<sup>+</sup>: 453.1839.

**BDA-57: Tert-butyl (3-((2-morpholinoethyl)carbamoyl)-5-phenylthiophen-2-yl) carbamate**

The product was synthesized according to procedure **step 4** and purified by column chromatography and afforded as yellow solid (166 mg, 86%), M.P.= 175 - 179 °C; <sup>1</sup>H NMR (500 MHz, CDCl<sub>3</sub>) δ 10.97 (s, 1H), 7.57 (d, J = 7.1 Hz, 2H), 7.39 (t, J = 7.8 Hz, 2H), 7.30 (d, J = 8.7 Hz, 1H), 7.11 (s, 1H), 6.68 (t, J = 5.0 Hz, 1H), 3.79 (t, J = 4.7 Hz, 4H), 3.55 (q, J = 5.4 Hz, 2H), 2.66 (t, J = 6.0 Hz, 2H), 2.57 (s, 4H), 1.56 (s, 9H). <sup>13</sup>C NMR (126 MHz, CDCl<sub>3</sub>) δ 165.29, 152.46, 148.46, 133.81, 132.79, 129.02, 127.35, 125.20, 116.35, 113.78, 81.96, 66.95, 56.87, 53.30, 35.37, 28.26. HRMS (ESI) m/z calculated for C<sub>22</sub>H<sub>29</sub>N<sub>3</sub>O<sub>4</sub>S [M+H]<sup>+</sup>: 432.1952; found [M+H]<sup>+</sup>: 432.1956.

**BDA-59: Tert-butyl (5-benzyl-3-((4-hydroxyphenethyl)carbamoyl)thiophen-2-yl) carbamate**



988 The product was synthesized according to procedure **step 4** and purified by column  
989 chromatography and afforded as yellow solid (188 mg, 83%), M.P.= 178 - 182 °C; <sup>1</sup>H NMR (500  
990 MHz, CDCl<sub>3</sub>) δ 7.34 (t, J = 7.3 Hz, 2H), 7.28 – 7.26 (m, 1H), 7.23 (dd, J = 8.9, 2.6 Hz, 4H), 7.15  
991 – 7.11 (m, 2H), 6.27 (s, 1H), 5.98 (s, 1H), 5.64 (t, J = 5.8 Hz, 1H), 3.92 (s, 2H), 3.59 (q, J = 7.0 Hz,  
992 2H), 2.88 (t, J = 6.9 Hz, 2H), 1.59 (s, 9H). <sup>13</sup>C NMR (126 MHz, CDCl<sub>3</sub>) δ 165.79, 160.02, 152.09,  
993 149.65, 139.74, 136.74, 129.76, 128.61, 128.57, 126.65, 125.92, 121.44, 119.83, 108.12, 83.60,  
994 40.40, 35.99, 35.49, 27.73. HRMS (ESI) m/z calculated for C<sub>25</sub>H<sub>28</sub>N<sub>2</sub>O<sub>4</sub>S [M+H]<sup>+</sup>: 453.1842;  
995 found [M+H]<sup>+</sup>: 453.1847.

996 **BDA-60: Tert-butyl (3-((4-hydroxyphenethyl)carbamoyl)-4,5-diphenylthiophen-2-yl)**  
997 **carbamate**

998 The product was synthesized according to procedure **step 4** and purified by column  
999 chromatography and afforded as yellow solid (195 mg, 76%), M.P.= 175 - 181 °C; <sup>1</sup>H NMR (500  
1000 MHz, CDCl<sub>3</sub>) δ 7.32 – 7.26 (m, 3H), 7.19 (d, J = 6.3 Hz, 2H), 7.11 (d, J = 7.4 Hz, 3H), 7.06 (d, J  
1001 = 8.5 Hz, 2H), 7.03 – 6.94 (m, 4H), 6.45 (s, 2H), 5.02 (s, 1H), 3.35 (q, J = 6.9 Hz, 2H), 2.52 (t, J =  
1002 7.0 Hz, 2H), 1.59 (s, 9H). <sup>13</sup>C NMR (126 MHz, CDCl<sub>3</sub>) δ 166.23, 160.74, 151.97, 149.56, 136.34,  
1003 136.32, 133.86, 133.82, 130.39, 129.41, 129.05, 128.65, 128.29, 128.15, 126.42, 121.24, 109.86,  
1004 83.49, 40.01, 34.57, 27.74. HRMS (ESI) m/z calculated for C<sub>30</sub>H<sub>30</sub>N<sub>2</sub>O<sub>4</sub>S [M+H]<sup>+</sup>: 515.1927;  
1005 found [M+H]<sup>+</sup>: 515.1929.

1006 **BDA-62: Tert-butyl (3-((4-hydroxyphenethyl)carbamoyl)-5-isopropylthiophen-2-yl)**  
1007 **carbamate**

1008 The product was synthesized according to procedure **step 4** and purified by column  
1009 chromatography and afforded as yellow solid (170 mg, 84%), M.P.= 172 - 178 °C; <sup>1</sup>H NMR (500  
1010 MHz, CDCl<sub>3</sub>) δ 7.27 – 7.22 (m, 2H), 7.16 – 7.12 (m, 2H), 6.26 (d, J = 1.1 Hz, 1H), 5.94 (s, 2H),  
1011 5.70 (t, J = 6.0 Hz, 1H), 3.65 – 3.53 (m, 2H), 2.93 (dd, J = 6.9, 1.2 Hz, 1H), 2.90 (t, J = 7.0 Hz,  
1012 2H), 1.58 (s, 9H), 1.25 (d, J = 6.9 Hz, 6H). <sup>13</sup>C NMR (126 MHz, CDCl<sub>3</sub>) 165.88, 158.69, 152.06,  
1013 149.67, 136.78, 135.07, 129.79, 121.44, 116.20, 108.00, 83.60, 40.42, 35.57, 29.58, 27.72, 24.22.  
1014 HRMS (ESI) m/z calculated for C<sub>21</sub>H<sub>28</sub>N<sub>2</sub>O<sub>4</sub>S [M+H]<sup>+</sup>: 405.1871; found [M+H]<sup>+</sup>: 405.1876.

1015 **BDA-63: Tert-butyl (3-(4-(4-hydroxyphenyl)piperazine-1-carbonyl)-5 phenylthiophen**  
1016 **-2-yl)carbamate**

1017 The product was synthesized according to procedure **step 4** and purified by column  
1018 chromatography and afforded as yellow solid (209 mg, 87%), M.P.= 175 - 181 °C; <sup>1</sup>H NMR (500  
1019 MHz, DMSO- *d*<sub>6</sub>) δ 10.00 (s, 1H), 8.89 (s, 1H), 8.33 (s, 1H), 7.63 (d, J = 8.2 Hz, 2H), 7.40 (t, J =  
1020 7.8 Hz, 2H), 7.32 (s, 1H), 7.29 (t, J = 7.4 Hz, 1H), 6.83 (d, J = 9.0 Hz, 2H), 6.68 (d, J = 8.8 Hz,  
1021 2H), 3.67 (t, J = 5.4 Hz, 4H), 3.03 (t, J = 5.2 Hz, 4H), 1.50 (s, 9H). <sup>13</sup>C NMR (126 MHz, DMSO-  
1022 *d*<sub>6</sub>) δ 164.86, 152.52, 151.81, 144.39, 142.04, 133.89, 129.55, 127.72, 125.36, 125.20, 121.07,  
1023 118.92, 116.02, 81.58, 50.73, 28.44, 28.31. HRMS (ESI) m/z calculated for C<sub>26</sub>H<sub>29</sub>N<sub>3</sub>O<sub>4</sub>S [M+H]<sup>+</sup>:  
1024 480.1915; found [M+H]<sup>+</sup>: 480.1919.

1025 **BDA-46: 2-amino-N-(4-fluorophenethyl)-5-phenylthiophene-3-carboxamide**

1026 The product was synthesized according to procedure **step 5** and afforded as red solid (53 mg, 98%),  
1027 M.P.= 195 - 201 °C; <sup>1</sup>H NMR (500 MHz, CDCl<sub>3</sub>) δ 7.41 (d, J = 8.0 Hz, 2H), 7.35 (t, J = 7.8 Hz,  
1028 2H), 7.26 – 7.20 (m, 3H), 7.07 – 7.01 (m, 2H), 6.85 (s, 1H), 6.23 (s, 2H), 5.79 (t, J = 6.0 Hz, 1H),  
1029 3.64 (q, J = 7.1 Hz, 2H), 2.91 (t, J = 7.1 Hz, 2H). <sup>13</sup>C NMR (126 MHz, CDCl<sub>3</sub>) δ 165.77, 162.67,  
1030 160.72, 160.38, 134.73, 134.70, 133.89, 130.29, 130.22, 128.90, 126.74, 125.43, 124.68, 117.82,  
1031 115.57, 115.40, 109.64, 40.61, 35.34. HRMS (ESI) m/z calculated for C<sub>19</sub>H<sub>17</sub>FN<sub>2</sub>OS [M+H]<sup>+</sup>:  
1032 341.1071; found [M+H]<sup>+</sup>: 341.1074.

1033 **BDA-50: 2-amino-N-(4-hydroxyphenethyl)-5-phenylthiophene-3-carboxamide**

1034 The product was synthesized according to procedure **step 5** and afforded yellow solid (167 mg,  
1035 99%), M.P.= 192 - 197 °C; <sup>1</sup>H NMR (500 MHz, DMSO- *d*<sub>6</sub>) δ 9.19 (s, 1H), 7.85 (t, J = 5.7 Hz,  
1036 1H), 7.60 (s, 1H), 7.46 (s, 2H), 7.40 (dd, J = 8.3, 1.5 Hz, 2H), 7.38 – 7.33 (m, 2H), 7.21 – 7.14 (m,  
1037 1H), 7.06 – 6.98 (m, 2H), 6.75 – 6.65 (m, 2H), 4.12 (d, J = 5.0 Hz, 2H), 2.70 (t, J = 7.6 Hz, 2H).  
1038 <sup>13</sup>C NMR (126 MHz, DMSO- *d*<sub>6</sub>) δ 165.71, 161.33, 156.08, 134.74, 130.15, 129.98, 129.94, 129.44,  
1039 126.31, 124.04, 121.85, 121.25, 121.06, 115.67, 115.52, 108.65, 41.06, 35.24. HRMS (ESI) m/z  
1040 calculated for C<sub>19</sub>H<sub>18</sub>N<sub>2</sub>O<sub>2</sub>S [M+H]<sup>+</sup>: 339.1125; found [M+H]<sup>+</sup>: 339.1128.

1041 **BDA-55: 2-amino-N-(4-hydroxyphenethyl)-4,5-diphenylthiophene-3-carboxamide**

1042 The product was synthesized according to procedure **step 5** and afforded yellow solid (201 mg,  
1043 97%), M.P.= 193 - 199 °C; <sup>1</sup>H NMR (500 MHz, DMSO- *d*<sub>6</sub>) δ 9.19 (s, 1H), 7.40 – 7.31 (m, 3H),  
1044 7.29 (s, 2H), 7.17 (dd, J = 7.6, 1.8 Hz, 2H), 7.15 – 7.11 (m, 2H), 7.11 – 7.06 (m, 1H), 6.99 – 6.91  
1045 (m, 2H), 6.78 (d, J = 8.5 Hz, 2H), 6.67 – 6.61 (m, 2H), 5.39 (t, J = 5.4 Hz, 1H), 3.16 – 3.04 (m,

1046 2H), 2.26 (t, J = 7.3 Hz, 2H). <sup>13</sup>C NMR (126 MHz, DMSO- *d*<sub>6</sub>) δ 165.58, 160.22, 156.11, 136.59,  
1047 134.66, 134.37, 130.49, 129.39, 129.28, 128.77, 128.50, 119.14, 115.69, 115.54, 109.94, 40.69,  
1048 34.39. HRMS (ESI) m/z calculated for C<sub>25</sub>H<sub>22</sub>N<sub>2</sub>O<sub>2</sub>S [M+H]<sup>+</sup>: 415.1451; found [M+H]<sup>+</sup>: 415.1453.  
1049

1050 **BDA-58: 2-amino-5-benzyl-N-(4-hydroxyphenethyl)thiophene-3-carboxamide**

1051 The product was synthesized according to procedure **step 5** and afforded yellow solid (169 mg,  
1052 96%), M.P.= 191 - 197 °C; <sup>1</sup>H NMR (500 MHz, CDCl<sub>3</sub>) δ 7.33 (t, J = 7.4 Hz, 2H), 7.27 (d, J = 13.6  
1053 Hz, 2H), 7.22 (d, J = 6.8 Hz, 2H), 7.00 (d, J = 8.5 Hz, 2H), 6.83 – 6.77 (m, 2H), 6.28 (s, 1H), 5.94  
1054 (s, 2H), 5.78 (t, J = 6.0 Hz, 1H), 3.89 (s, 2H), 3.53 (q, J = 7.1 Hz, 2H), 2.76 (t, J = 7.2 Hz, 2H). <sup>13</sup>C  
1055 NMR (126 MHz, CDCl<sub>3</sub>) δ 166.01, 160.06, 154.77, 139.66, 130.44, 129.86, 128.64, 128.58, 126.70,  
1056 126.19, 119.81, 115.64, 108.06, 40.79, 35.96, 35.08. HRMS (ESI) m/z calculated for C<sub>20</sub>H<sub>20</sub>N<sub>2</sub>O<sub>2</sub>S  
1057 [M+H]<sup>+</sup>: 353.1255; found [M+H]<sup>+</sup>: 353.1258.  
1058

1059 **BDA-61: 2-amino-N-(4-hydroxyphenethyl)-5-isopropylthiophene-3-carboxamide**

1060 The product was synthesized according to procedure **step 5** and afforded yellow solid (149 mg,  
1061 98%), M.P.= 190 - 195 °C; <sup>1</sup>H NMR (500 MHz, DMSO- *d*<sub>6</sub>) δ 9.18 (s, 1H), 7.68 (t, J = 5.8 Hz,  
1062 1H), 7.09 – 6.98 (m, 4H), 6.77 (d, J = 1.3 Hz, 1H), 6.69 (d, J = 8.5 Hz, 2H), 3.33 – 3.25 (m, 2H),  
1063 2.91 – 2.78 (m, 1H), 2.70 – 2.62 (m, 2H), 1.19 (d, J = 6.8 Hz, 6H). <sup>13</sup>C NMR (126 MHz, DMSO-  
1064 *d*<sub>6</sub>) δ 165.90, 159.63, 156.04, 131.64, 130.20, 129.92, 118.62, 118.49, 115.64, 115.50, 106.67,  
1065 40.96, 35.32, 29.32, 24.57, 24.49. HRMS (ESI) m/z calculated for C<sub>16</sub>H<sub>20</sub>N<sub>2</sub>O<sub>2</sub>S [M+H]<sup>+</sup>: 305.1225;  
1066 found [M+H]<sup>+</sup>: 305.1228.  
1067

1068 **BDA-70: 2-(1-cyanocyclopropane-1-carboxamido)-N-(4-hydroxyphenethyl)-5-phenylthiophene-3-carboxamide**

1070 The product was synthesized according to procedure **step 6** and purified by column  
1071 chromatography and afforded as yellow solid (293 mg, 68%), M.P.= 185 - 190 °C; <sup>1</sup>H NMR (500  
1072 MHz, CDCl<sub>3</sub>) δ 7.42 (d, J = 6.9 Hz, 2H), 7.34 (t, J = 7.8 Hz, 2H), 7.28 (d, J = 8.2 Hz, 2H), 7.23 (t,  
1073 J = 7.3 Hz, 1H), 7.14 – 7.10 (m, 2H), 6.87 (s, 1H), 6.23 (s, 2H), 5.85 (t, J = 5.9 Hz, 1H), 3.65 (q, J  
1074 = 7.0 Hz, 2H), 2.93 (t, J = 7.0 Hz, 2H), 1.89 – 1.85 (m, 2H), 1.84 – 1.80 (m, 2H). <sup>13</sup>C NMR (126  
1075 MHz, CDCl<sub>3</sub>) δ 166.76, 165.80, 160.39, 148.88, 137.61, 133.89, 129.99, 128.88, 126.70, 125.39,

1076 124.69, 121.30, 118.31, 117.92, 109.63, 40.48, 35.52, 19.97, 13.51. HRMS (ESI) m/z calculated  
1077 for C<sub>24</sub>H<sub>21</sub>N<sub>3</sub>O<sub>3</sub>S [M+H]<sup>+</sup>: 432.1372; found [M+H]<sup>+</sup>: 432.1378.

1078  
1079 **Scheme 2. Syntheses of compounds BDA-32, BDA-33, BDA-35, BDA-40, BDA-41, BDA-45,**  
1080 **BDA-47, BDA-48, BDA-51, BDA-52, BDA-53, BDA-54, BDA-56.** <sup>a</sup>

1081

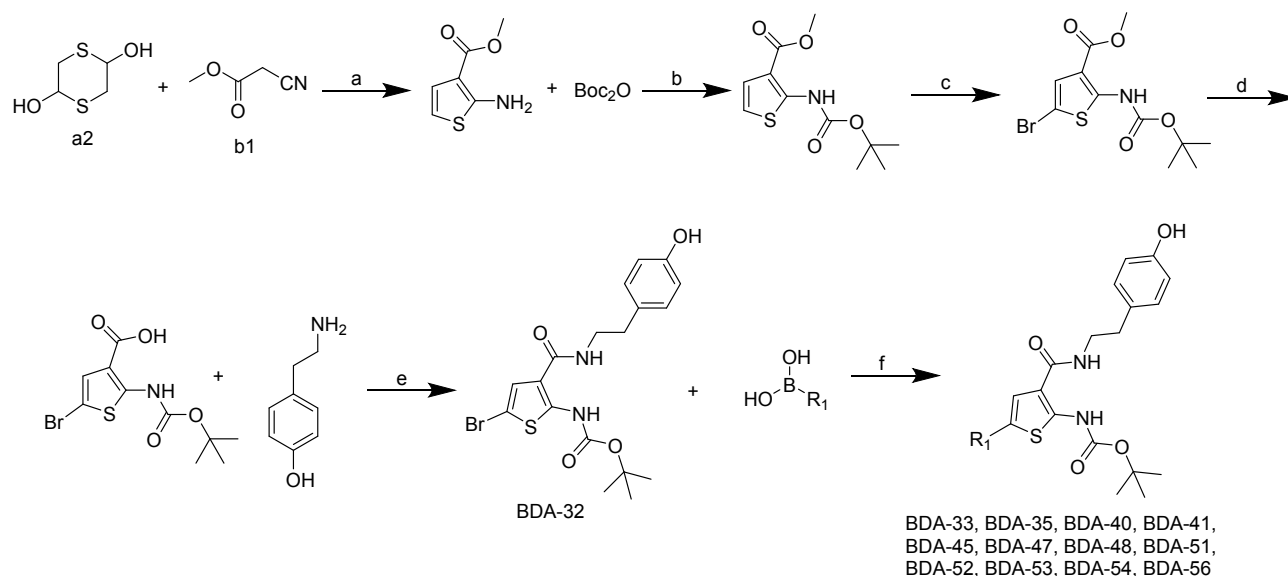

<sup>a</sup>Reagents and conditions: (a) S, Et<sub>3</sub>N, MeOH, 40 °C, 12 h; (b) Boc<sub>2</sub>O, DMAP, Dioxane, 60 °C, 12 h; (c) NBS, DCM, 0 °C- rt, 1.5 h; (d) NaOH, MeOH : H<sub>2</sub>O : THF = 2 : 2 : 1, 80 °C, 6 h; (e) HATU, EtOAc, rt, 12 h; (f) Pd(PPh<sub>3</sub>)<sub>4</sub>, K<sub>3</sub>PO<sub>4</sub>, DMF: H<sub>2</sub>O = 4 : 1, 80 °C, N<sub>2</sub>, 16 h.

### General Procedure for Preparing the products Using Method B

As Described in Scheme 2:

#### Step 1':

Methyl 2-cyanoacetate (4.0 g, 40.0 mmol, 1.0 eq), 1,4-dithiane-2,5-diol (3.04 g, 20.0 mmol, 0.5 eq), and triethylamine (1.7 mL, 12.0 mmol, 0.3 eq) in 100 mL methanol are added into a 250 mL round-bottomed flask. The reaction mixture was heated at 40 °C for 12 h. Then the reaction was cooled to room temperature and extracted with DCM (200 mL x 3). The organic layer was dry with MgSO<sub>4</sub>, filtered and concentrated under reduced pressure. The residue was purified by column chromatography on silica gel using EtOAc-PE (5% → 80%) as an eluent to give final compound (5.1 g, 80%) red solid. M.P.= 177 - 182 °C; <sup>1</sup>H NMR (500 MHz, CDCl<sub>3</sub>) δ 6.99 (d, J = 5.7 Hz, 1H), 6.21 (d, J = 5.8 Hz, 1H), 5.96 (s, 2H), 3.84 (s, 3H). <sup>13</sup>C NMR (126 MHz, CDCl<sub>3</sub>) δ 165.82, 162.76,

1098 125.81, 107.03, 106.93, 51.00. HRMS (ESI) m/z calculated for C<sub>6</sub>H<sub>7</sub>NO<sub>2</sub>S [M+H]<sup>+</sup>: 158.0247;  
1099 found [M+H]<sup>+</sup>: 158.0249.

1100  
1101 **Step 2’:**  
1102 To a 50 mL round bottom flask were added dioxane (40 mL), methyl 2-aminothiophene-3-  
1103 carboxylate (4.7 g, 30.0 mmol, 1.0 eq), Boc<sub>2</sub>O (7.2 g, 33.0 mmol, 1.1 eq) and DMAP (388 mg, 3.0  
1104 mmol, 0.1 eq) and the reaction mixture was stirred at 60 °C for 12 h. After cooling to room  
1105 temperature the solvent was removed under reduced pressure, and the residue was purified by  
1106 column chromatography on silica gel (EtOAc–heptane 5 → 50%) to yield methyl 2-((tert-  
1107 butoxycarbonyl)amino)thiophene-3-carboxylate (7.3 g, 95%), M.P.= 177 - 180 °C; <sup>1</sup>H NMR (500  
1108 MHz, CDCl<sub>3</sub>) δ 7.36 (d, J = 6.6 Hz, 1H), 7.16 (d, J = 5.8 Hz, 1H), 3.84 (s, 3H), 1.42 (s, 9H). <sup>13</sup>C  
1109 NMR (126 MHz, CDC<sub>13</sub>) δ 162.25, 150.37, 146.67, 127.45, 127.21, 122.73, 83.31, 51.74, 27.78.  
1110 HRMS (ESI) m/z calculated for C<sub>11</sub>H<sub>15</sub>NO<sub>4</sub>S [M+H]<sup>+</sup>: 258.0739; found [M+H]<sup>+</sup>: 258.0754.

1111  
1112 **Step 3’:**  
1113 To a solution of methyl 2-((tert-butoxycarbonyl)amino)thiophene-3-carboxylate (1.6 g, 6.22 mmol,  
1114 1.0 eq) in dichloromethane (10 mL) and acetic acid (10 mL) were added NBS (1.33 g, 7.46 mmol,  
1115 1.2 eq) at 0 °C for 0.5 h. The reaction mixture was stirred at room temperature for 1 h. Then the  
1116 reaction mixture was diluted with water and extracted with ethyl acetate (200 mL x 3). The organic  
1117 layer was washed with saturated NaHCO<sub>3</sub> and finally with brine, dried with MgSO<sub>4</sub>. The solvent  
1118 was removed on a rotary evaporator, and the residue was purified by column chromatography on  
1119 silica gel (EtOAc–heptane 10 → 50%) to yield the product (1.56 g, 75%) as red solid. M.P.= 177  
1120 - 180 °C; <sup>1</sup>H NMR (500 MHz, CDCl<sub>3</sub>) δ 10.04 (s, 1H), 7.15 (s, 1H), 3.87 (s, 3H), 1.55 (s, 9H). <sup>13</sup>C  
1121 NMR (126 MHz, CDC<sub>13</sub>) δ 164.74, 152.15, 151.50, 126.01, 110.71, 102.55, 82.81, 51.75, 28.15.  
1122 HRMS (ESI) m/z calculated for C<sub>11</sub>H<sub>14</sub>BrNO<sub>4</sub>S [M+H]<sup>+</sup>: 335.9871; found [M+H]<sup>+</sup>: 335.9883.

1123  
1124 **Step 4’:**  
1125 The methyl 5-bromo-2-((tert-butoxycarbonyl)amino)thiophene-3-carboxylate (740 mg, 2.2 mmol,  
1126 1.0 eq) was subsequently subjected to a base hydrolysis at 80 °C for 6 h with a solution of NaOH  
1127 (594 mg, 14.85 mmol, 6.75 eq) in 30 mL of a solvent mixture (MeOH–H<sub>2</sub>O–THF = 2:2:1). The  
1128 reaction was cooled to room temperature and the organic solvents were removed in vacuo. The

1129 aqueous layer was acidified with 5% HCl to give a precipitate, which was filtered to afford the  
1130 compound ( 465 mg, 65%) as red solid, M.P.= 198 - 203 °C; <sup>1</sup>H NMR (500 MHz, CDCl<sub>3</sub>) δ 9.85  
1131 (s, 1H), 7.21 (s, 1H), 1.58 (s, 9H). <sup>13</sup>C NMR (126 MHz, CDCl<sub>3</sub>) δ 168.05, 153.34, 148.42, 128.60,  
1132 126.25, 109.82, 84.02, 28.17. HRMS (ESI) m/z calculated for C<sub>10</sub>H<sub>12</sub>BrNO<sub>4</sub>S [M+H]<sup>+</sup>: 321.9731;  
1133 found [M+H]<sup>+</sup>: 321.9745.

1134

#### 1135 **Step 5':**

1136 To a solution of compound 5-bromo-2-((tert-butoxycarbonyl)amino)thiophene-3-carboxylic acid  
1137 (607 mg, 2.0 mmol, 1.0 eq) and DIPEA (1.2 mL, 6.0 mmol, 3.0 eq ) in ethyl acetate (20 mL) was  
1138 added HATU (420 mg, 1.1 mmol, 1.1eq) and 4-(2-aminoethyl)phenol (302 mg, 2.2 mmol, 1.2 eq).  
1139 The reaction mixture was stirred at room temperature for 12 h. The mixture was washed with water  
1140 and extracted with EtOAc. The organic layer was separated, washed with water and brine, dried  
1141 over MgSO<sub>4</sub>, filtered and concentrated under reduced pressure. The residue was purified by column  
1142 chromatography on silica gel using EtOAc–PE (10% → 75%) as an eluent to give the product  
1143 **BDA-32** (318 mg, 64%) as yellow solid, M.P.= 192 - 196 °C; <sup>1</sup>H NMR (500 MHz, CDCl<sub>3</sub>) δ 10.93  
1144 (s, 1H), 7.15 – 7.04 (m, 2H), 6.88 – 6.76 (m, 2H), 6.73 (s, 1H), 5.80 – 5.73 (m, 1H), 5.00 (s, 1H),  
1145 3.65 – 3.58 (m, 2H), 2.84 (t, J = 6.9 Hz, 2H), 1.54 (s, 9H). <sup>13</sup>C NMR (126 MHz, CDCl<sub>3</sub>) δ 164.18,  
1146 154.43, 152.50, 149.51, 130.61, 129.91, 122.82, 115.68, 112.65, 103.17, 82.30, 40.83, 34.84, 28.19.  
1147 HRMS (ESI) m/z calculated for C<sub>18</sub>H<sub>21</sub>BrN<sub>2</sub>O<sub>4</sub>S [M+H]<sup>+</sup>: 441.0427; found [M+H]<sup>+</sup>:441.0434.

1148

#### 1149 **Step 6':**

1150 The compound tert-butyl (5-bromo-3-((4-hydroxyphenethyl)carbamoyl)  
1151 thiophen-2-yl)carbamate (136 mg, 0.32 mmol, 1.0 eq), benzo[d][1,3]dioxol-5-ylboronic acid (64  
1152 mg, 0.38 mmol, 1.1 eq) and K<sub>3</sub>PO<sub>4</sub> (424 mg, 2.0 mmol, 6.25 eq) were dissolved in 4:1 DMF /H<sub>2</sub>O  
1153 under the atmosphere of N<sub>2</sub>. Then the Pd(PPh<sub>3</sub>)<sub>4</sub> (12 mg, 0.001 mmol, 0.03 eq) was added and the  
1154 reaction mixture was heated at 80 °C for 16 h. The solution was cooled and diluted with EtOAc  
1155 (30 mL), extracted with EtOAc(100 mL x 3), then washed with water and brine. The organic layer  
1156 was dried over MgSO<sub>4</sub>, filtered and concentrated under reduced pressure. The residue was purified  
1157 by column chromatography on silica gel using MeOH /DCM (1% → 10%) as an eluent to give the  
1158 final product **BDA-41** (105 mg, 68%) as yellow solid, M.P.= 198 - 202 °C; <sup>1</sup>H NMR (500 MHz,  
1159 DMSO- *d*<sub>6</sub>) δ 11.26 (s, 1H), 9.20 (s, 1H), 8.38 (t, J = 5.5 Hz, 1H), 7.68 (s, 1H), 7.10 (d, J = 1.9 Hz,

1160 1H), 7.06 – 7.00 (m, 3H), 6.97 (d, J = 8.2 Hz, 1H), 6.70 (d, J = 8.5 Hz, 2H), 6.07 (s, 2H), 3.44 –  
1161 3.37 (m, 2H), 2.73 (t, J = 7.6 Hz, 2H), 1.51 (s, 9H). <sup>13</sup>C NMR (126 MHz, DMSO- *d*<sub>6</sub>) δ 165.09,  
1162 156.17, 151.83, 148.56, 147.19, 146.30, 131.48, 129.97, 129.78, 128.25, 118.79, 115.71, 115.56,  
1163 114.92, 109.40, 105.52, 101.79, 82.04, 41.29, 34.82, 28.35, 28.18. HRMS (ESI) m/z calculated for  
1164 C<sub>25</sub>H<sub>26</sub>N<sub>2</sub>O<sub>6</sub>S [M+H]<sup>+</sup>: 483.1507; found [M+H]<sup>+</sup>: 483.1532.

1165 The compounds **BDA-33**, **BDA-35**, **BDA-40**, **BDA-45**, **BDA-47**, **BDA-48**, **BDA-51**, **BDA-52**,  
1166 **BDA-53**, **BDA-54**, **BDA-56** and **BDA-69** are synthesized according to general procedure 6'.

1167

1168 **BDA-33: Tert-butyl (5-(2,3-dihydrobenzo[b][1,4]dioxin-6-yl)-3-((4 hydroxyphenethyl)**  
1169 **carbamoyl) thiophen-2-yl)carbamate.**

1170 The compounds **BDA-33** was synthesized according to general procedure 6', and yielded final  
1171 compound (184 mg, 74%) brown solid, M.P.= 195 - 200 °C; <sup>1</sup>H NMR (500 MHz, CDCl<sub>3</sub>) δ 10.91  
1172 (s, 1H), 7.16 – 7.09 (m, 2H), 7.04 (d, J = 2.2 Hz, 1H), 7.00 (dd, J = 8.4, 2.2 Hz, 1H), 6.88 – 6.81  
1173 (m, 3H), 6.79 (s, 1H), 5.92 (t, J = 5.8 Hz, 1H), 5.18 (s, 1H), 4.29 (s, 4H), 3.64 (q, J = 6.9 Hz, 2H),  
1174 2.87 (t, J = 6.9 Hz, 2H), 1.56 (s, 9H). <sup>13</sup>C NMR (126 MHz, CDCl<sub>3</sub>) δ 187.40, 171.36, 165.22,  
1175 154.43, 143.79, 143.20, 130.78, 129.98, 123.59, 118.60, 117.74, 115.66, 115.22, 114.13, 113.54,  
1176 97.19, 64.44, 53.44, 40.80, 34.94, 28.26. HRMS (ESI) m/z calculated for C<sub>26</sub>H<sub>28</sub>N<sub>2</sub>O<sub>6</sub>S [M+H]<sup>+</sup>:  
1177 497.1712; found [M+H]<sup>+</sup>: 497.1715.

1178

1179 **BDA-35: Tert-butyl (5-(2-aminopyrimidin-5-yl)-3-((4-hydroxyphenethyl)carbamoyl)**  
1180 **thiophen-2-yl)carbamate.**

1181 The compounds **BDA-35** was synthesized according to general procedure 6', and yielded final  
1182 compound (148 mg, 65%) yellow solid, M.P.= 198 - 203 °C; <sup>1</sup>H NMR (500 MHz, DMSO- *d*<sub>6</sub>) δ  
1183 11.26 (s, 1H), 9.19 (s, 1H), 8.43 (s, 2H), 8.32 (s, 2H), 7.61 (s, 1H), 7.04 (d, J = 8.5 Hz, 2H), 6.88  
1184 (s, 1H), 6.70 (d, J = 8.5 Hz, 2H), 3.44 – 3.36 (m, 2H), 2.72 (t, J = 7.6 Hz, 2H), 1.51 (s, 9H). <sup>13</sup>C  
1185 NMR (126 MHz, DMSO- *d*<sub>6</sub>) δ 165.01, 163.09, 156.17, 154.86, 154.79, 151.85, 146.15, 129.96,  
1186 129.77, 126.55, 117.33, 115.63, 114.91, 79.68, 79.62, 41.29, 34.82, 28.32, 28.21. HRMS (ESI) m/z  
1187 calculated for C<sub>22</sub>H<sub>25</sub>N<sub>5</sub>O<sub>4</sub>S [M+H]<sup>+</sup>: 456.1622; found [M+H]<sup>+</sup>: 456.1625.

1188

1189 **BDA-40: Tert-butyl (5-(5-chloropyridin-3-yl)-3-((4-hydroxyphenethyl)carbamoyl)**  
1190 **thiophen-2-yl)carbamate.**

1191 The compounds **BDA-40** was synthesized according to general procedure 6', and yielded final  
1192 compound (201 mg, 85%) yellow solid, M.P.= 194 - 199 °C; <sup>1</sup>H NMR (500 MHz, CDCl<sub>3</sub>) δ 10.99  
1193 (s, 1H), 8.48 (s, 1H), 8.31 (s, 1H), 7.71 (t, J = 2.1 Hz, 1H), 7.11 (s, 1H), 7.08 (d, J = 8.5 Hz, 2H),  
1194 6.84 (d, J = 8.5 Hz, 2H), 6.52 (t, J = 5.9 Hz, 1H), 3.62 (q, J = 6.6 Hz, 2H), 2.85 (t, J = 6.7 Hz, 2H),  
1195 1.55 (s, 9H). <sup>13</sup>C NMR (126 MHz, CDCl<sub>3</sub>) δ 164.84, 155.20, 152.39, 149.85, 145.60, 142.81,  
1196 132.76, 132.19, 131.67, 130.21, 130.12, 126.37, 119.29, 115.76, 114.39, 82.63, 40.83, 34.74, 28.19.  
1197 HRMS (ESI) m/z calculated for C<sub>23</sub>H<sub>24</sub>ClN<sub>3</sub>O<sub>4</sub>S [M+H]<sup>+</sup>: 474.1223; found [M+H]<sup>+</sup>: 474.1226.

1198  
1199 **BDA-45: Tert-butyl (5-(4-formylphenyl)-3-((4-hydroxyphenethyl)carbamoyl) thiophen- 2-**  
1200 **yl)carbamate.**

1201 The compounds **BDA-45** was synthesized according to general procedure 6', and yielded final  
1202 compound (177 mg, 76%) yellow solid, M.P.= 192 - 197 °C; <sup>1</sup>H NMR (500 MHz, DMSO- *d*<sub>6</sub>) δ  
1203 11.38 (s, 1H), 9.98 (s, 1H), 9.20 (s, 1H), 8.52 (t, J = 5.7 Hz, 1H), 8.07 (s, 1H), 7.95 (d, J = 8.4 Hz,  
1204 2H), 7.75 (d, J = 8.4 Hz, 2H), 7.05 (d, J = 8.4 Hz, 2H), 6.70 (d, J = 8.5 Hz, 2H), 3.48 – 3.38 (m,  
1205 2H), 2.74 (t, J = 7.6 Hz, 2H), 1.52 (s, 9H). <sup>13</sup>C NMR (126 MHz, DMSO- *d*<sub>6</sub>) δ 192.55, 192.50,  
1206 164.91, 156.19, 151.83, 148.71, 139.72, 134.93, 131.05, 130.95, 130.00, 129.93, 129.82, 129.76,  
1207 125.12, 124.97, 122.22, 115.71, 115.60, 115.57, 82.39, 41.33, 34.79, 28.28. HRMS (ESI) m/z  
1208 calculated for C<sub>25</sub>H<sub>26</sub>N<sub>2</sub>O<sub>5</sub>S [M+H]<sup>+</sup>: 467.1633; found [M+H]<sup>+</sup>: 467.1637.

1209  
1210 **BDA-47: Tert-butyl (3-((4-hydroxyphenethyl)carbamoyl)-5-(3-morpholinophenyl) thiophen-**  
1211 **2-yl)carbamate.**

1212 The compounds **BDA-47** was synthesized according to general procedure 6', and yielded final  
1213 compound (160 mg, 61%) yellow solid, M.P.= 194 - 199 °C; <sup>1</sup>H NMR (500 MHz, DMSO- *d*<sub>6</sub>) δ  
1214 11.31 (s, 1H), 9.21 (s, 1H), 8.46 (t, J = 5.8 Hz, 1H), 7.79 (s, 1H), 7.28 (t, J = 8.0 Hz, 1H), 7.07 –  
1215 7.02 (m, 3H), 7.00 (d, J = 8.4 Hz, 1H), 6.90 (dd, J = 7.9, 2.4 Hz, 1H), 6.70 (d, J = 8.5 Hz, 2H), 3.80  
1216 – 3.75 (m, 4H), 3.41 (dd, J = 14.7, 5.4 Hz, 2H), 3.20 – 3.15 (m, 4H), 2.73 (t, J = 7.5 Hz, 2H), 1.51  
1217 (s, 9H). <sup>13</sup>C NMR (126 MHz, DMSO- *d*<sub>6</sub>) δ 165.12, 164.03, 156.18, 152.12, 146.80, 134.64, 132.09,  
1218 130.22, 130.02, 129.78, 119.07, 115.71, 115.57, 115.00, 82.07, 66.55, 48.77, 40.56, 28.34, 28.18.  
1219 HRMS (ESI) m/z calculated for C<sub>28</sub>H<sub>33</sub>N<sub>3</sub>O<sub>5</sub>S [M+H]<sup>+</sup>: 524.2113; found [M+H]<sup>+</sup>: 524.2115.

1220



1221 **BDA-48: Tert-butyl (5-(3-formylphenyl)-3-((4-hydroxyphenethyl)carbamoyl) thiophen-2-**  
1222 **yl)carbamate.**

1223 The compounds **BDA-48** was synthesized according to general procedure 6', and yielded final  
1224 compound (173 mg, 74%) yellow solid, M.P.= 191 - 197 °C; <sup>1</sup>H NMR (500 MHz, CDCl<sub>3</sub>) δ 10.89  
1225 (s, 1H), 10.05 (s, 1H), 8.07 (t, J = 1.8 Hz, 1H), 7.79 – 7.73 (m, 2H), 7.56 (t, J = 7.6 Hz, 1H), 7.15  
1226 (d, J = 8.5 Hz, 2H), 7.00 (s, 1H), 6.96 – 6.90 (m, 2H), 5.87 (t, J = 6.1 Hz, 1H), 3.65 (q, J = 6.8 Hz,  
1227 2H), 2.90 (t, J = 6.8 Hz, 2H), 1.57 (s, 9H). <sup>13</sup>C NMR (126 MHz, CDCl<sub>3</sub>) δ 192.63, 164.83, 154.97,  
1228 152.42, 148.91, 136.74, 134.87, 130.81, 130.74, 130.30, 130.18, 129.83, 129.41, 124.55, 117.66,  
1229 115.87, 114.06, 82.29, 40.45, 34.75, 28.23. HRMS (ESI) m/z calculated for C<sub>25</sub>H<sub>26</sub>N<sub>2</sub>O<sub>5</sub>S [M+H]<sup>+</sup>:  
1230 467.1632; found [M+H]<sup>+</sup>: 467.1635.

1231  
1232 **BDA-51: Tert-butyl (5-(3-aminophenyl)-3-((4-hydroxyphenethyl)carbamoyl)**  
1233 **thiophen-2-yl)carbamate.**

1234 The compounds **BDA-51** was synthesized according to general procedure 6', and yielded final  
1235 compound (154 mg, 68%) yellow solid, M.P.= 194 - 199 °C; <sup>1</sup>H NMR (500 MHz, DMSO- *d*<sub>6</sub>) δ  
1236 11.29 (s, 1H), 9.18 (s, 1H), 8.47 (t, J = 5.8 Hz, 1H), 8.32 (s, 1H), 7.68 (s, 1H), 7.08 – 7.05 (m, 1H),  
1237 7.04 (d, J = 8.5 Hz, 2H), 6.77 (t, J = 2.0 Hz, 1H), 6.70 (d, J = 8.4 Hz, 2H), 6.50 (dd, J = 8.0, 1.3 Hz,  
1238 1H), 5.21 (s, 2H), 3.46 – 3.36 (m, 2H), 2.73 (t, J = 7.6 Hz, 2H), 1.51 (s, 9H). <sup>13</sup>C NMR (126 MHz,  
1239 DMSO- *d*<sub>6</sub>) δ 165.18, 156.16, 151.85, 149.75, 149.54, 146.42, 134.43, 132.55, 129.98, 129.96,  
1240 129.83, 118.65, 115.69, 114.95, 112.64, 110.42, 79.69, 41.26, 34.79, 28.37. HRMS (ESI) m/z  
1241 calculated for C<sub>24</sub>H<sub>27</sub>N<sub>3</sub>O<sub>4</sub>S [M+H]<sup>+</sup>: 454.1724; found [M+H]<sup>+</sup>: 454.1728.

1242  
1243 **BDA-52: Tert-butyl (3-((4-hydroxyphenethyl)carbamoyl)-5-(p-tolyl)thiophen-2-**  
1244 **yl)carbamate**

1245 The compounds **BDA-52** was synthesized according to general procedure 6', and yielded final  
1246 compound (267 mg, 61%) yellow solid, M.P.= 191 - 197 °C; <sup>1</sup>H NMR (500 MHz, CDCl<sub>3</sub>) δ 10.94  
1247 (s, 1H), 7.43 (d, J = 8.2 Hz, 2H), 7.18 (d, J = 8.0 Hz, 2H), 7.15 – 7.09 (m, 2H), 6.89 (s, 1H), 6.86  
1248 – 6.80 (m, 2H), 5.94 (t, J = 5.8 Hz, 1H), 3.69 – 3.60 (m, 2H), 2.88 (t, J = 7.0 Hz, 2H), 2.37 (s, 3H),  
1249 1.56 (s, 9H). <sup>13</sup>C NMR (126 MHz, CDCl<sub>3</sub>) δ 165.26, 154.38, 148.14, 137.26, 130.91, 130.84,  
1250 129.99, 129.65, 125.11, 115.63, 115.43, 113.58, 81.94, 40.87, 34.97, 28.26, 21.16. HRMS (ESI)  
1251 m/z calculated for C<sub>25</sub>H<sub>29</sub>N<sub>2</sub>O<sub>4</sub>S [M+H]<sup>+</sup>: 453.1812; found [M+H]<sup>+</sup>: 453.1817.

1252 **BDA-53: Tert-butyl (5-(3-cyanophenyl)-3-((4-hydroxyphenethyl)carbamoyl)**  
1253 **thiophen-2-yl)carbamate.**

1254 The compounds **BDA-53** was synthesized according to general procedure 6', and yielded final  
1255 compound (155 mg, 67%) yellow solid, M.P.= 193 - 198 °C; <sup>1</sup>H NMR (500 MHz, DMSO- *d*<sub>6</sub>) δ  
1256 11.31 (s, 1H), 9.20 (s, 1H), 8.41 (t, J = 5.7 Hz, 1H), 7.99 (s, 1H), 7.95 (t, J = 1.8 Hz, 1H), 7.83 (dt,  
1257 J = 8.0, 1.5 Hz, 1H), 7.73 (dt, J = 7.7, 1.4 Hz, 1H), 7.62 (t, J = 7.8 Hz, 1H), 7.08 – 7.01 (m, 2H),  
1258 6.74 – 6.66 (m, 2H), 3.46 – 3.38 (m, 2H), 2.74 (t, J = 7.6 Hz, 2H), 1.52 (s, 9H). <sup>13</sup>C NMR (126  
1259 MHz, DMSO- *d*<sub>6</sub>) δ 164.90, 156.19, 151.83, 148.05, 135.28, 130.88, 130.67, 129.97, 129.74,  
1260 129.43, 129.25, 128.88, 128.07, 127.93, 121.58, 121.46, 118.92, 115.71, 115.59, 115.26, 112.81,  
1261 82.34, 41.32, 34.80, 28.31. HRMS (ESI) m/z calculated for C<sub>25</sub>H<sub>25</sub>N<sub>3</sub>O<sub>4</sub>S [M+H]<sup>+</sup>: 464.1641;  
1262 found [M+H]<sup>+</sup>: 464.1647.

1263  
1264 **BDA-54: Tert-butyl (5-(4-fluorophenyl)-3-((4-hydroxyphenethyl)carbamoyl)thiophen -2-**  
1265 **yl)carbamate.**

1266 The compounds **BDA-54** was synthesized according to general procedure 6', and yielded final  
1267 compound (171 mg, 75%) yellow solid, M.P.= 191 - 196 °C; <sup>1</sup>H NMR (500 MHz, CDCl<sub>3</sub>) δ 10.90  
1268 (s, 1H), 7.40 (dd, J = 8.8, 5.2 Hz, 2H), 7.05 (d, J = 8.5 Hz, 2H), 7.00 (t, J = 8.6 Hz, 2H), 6.92 (s,  
1269 1H), 6.83 (d, J = 8.4 Hz, 2H), 6.25 (t, J = 5.9 Hz, 1H), 3.61 (q, J = 6.9 Hz, 2H), 2.83 (t, J = 7.1 Hz,  
1270 2H), 1.53 (s, 9H). <sup>13</sup>C NMR (126 MHz, CDCl<sub>3</sub>) δ 165.39, 163.12, 161.15, 154.79, 152.47, 148.29,  
1271 131.85, 130.31, 129.90, 129.88, 126.83, 126.77, 116.32, 115.99, 115.82, 115.73, 113.75, 82.29,  
1272 41.06, 34.87, 28.21. HRMS (ESI) m/z calculated for C<sub>24</sub>H<sub>25</sub>FN<sub>2</sub>O<sub>4</sub>S [M+H]<sup>+</sup>: 457.1513; found  
1273 [M+H]<sup>+</sup>: 457.1517.

1274  
1275 **BDA-56: Tert-butyl (5-(3,4-dichlorophenyl)-3-((4-hydroxyphenethyl)carbamoyl)**  
1276 **thiophen-2-yl)carbamate.**

1277 The compounds **BDA-56** was synthesized according to general procedure 6', and yielded final  
1278 compound (181 mg, 71%) yellow solid, M.P.= 192 - 197 °C; <sup>1</sup>H NMR (500 MHz, CDCl<sub>3</sub>) δ 10.96  
1279 (s, 1H), 7.61 (d, J = 2.2 Hz, 1H), 7.42 (d, J = 8.4 Hz, 1H), 7.32 (dd, J = 8.4, 2.1 Hz, 1H), 7.13 (d, J  
1280 = 8.5 Hz, 2H), 6.95 (s, 1H), 6.84 (d, J = 8.5 Hz, 2H), 5.95 (t, J = 6.0 Hz, 1H), 3.71 – 3.55 (m, 2H),  
1281 2.88 (t, J = 6.9 Hz, 2H), 1.56 (s, 9H). <sup>13</sup>C NMR (126 MHz, CDCl<sub>3</sub>) δ 164.97, 154.46, 152.43,  
1282 149.19, 133.82, 133.11, 130.97, 130.83, 130.68, 129.97, 126.70, 124.19, 117.29, 115.66, 113.82,

1283 82.36, 40.94, 34.92, 28.23. HRMS (ESI)  $m/z$  calculated for  $C_{24}H_{24}Cl_2N_2O_4S$   $[M+H]^+$ : 507.0825;  
1284 found  $[M+H]^+$ : 507.0828.

1285  
1286 **BDA-69: Methyl 2-((tert-butoxycarbonyl)amino)-5-(2,3-dihydrobenzo[b][1,4]dioxin-6-yl)**  
1287 **thiophene-3-carboxylate**

1288 The compounds **BDA-69** was synthesized according to General procedure 6', and yielded final  
1289 compound (294 mg, 75%) yellow solid, M.P.= 187 - 192 °C;  $^1H$  NMR (500 MHz,  $CDCl_3$ )  $\delta$  10.04  
1290 (s, 1H), 7.24 (s, 1H), 7.09 (d,  $J = 2.4$  Hz, 1H), 7.05 (dd,  $J = 8.4, 2.3$  Hz, 1H), 6.86 (d,  $J = 8.4$  Hz,  
1291 1H), 4.28 (s, 4H), 3.90 (s, 3H), 1.57 (s, 9H).  $^{13}C$  NMR (126 MHz,  $CDCl_3$ )  $\delta$  165.74, 152.09, 149.96,  
1292 143.80, 143.16, 132.17, 127.45, 118.57, 118.49, 117.67, 114.18, 111.63, 82.39, 64.45, 64.40, 51.61,  
1293 28.22. HRMS (ESI)  $m/z$  calculated for  $C_{19}H_{22}NO_6S$   $[M+H]^+$ : 392.1125; found  $[M+H]^+$ : 392.1129.

1294

1295 **Scheme 3. Syntheses of compounds BDA-44.<sup>a</sup>**

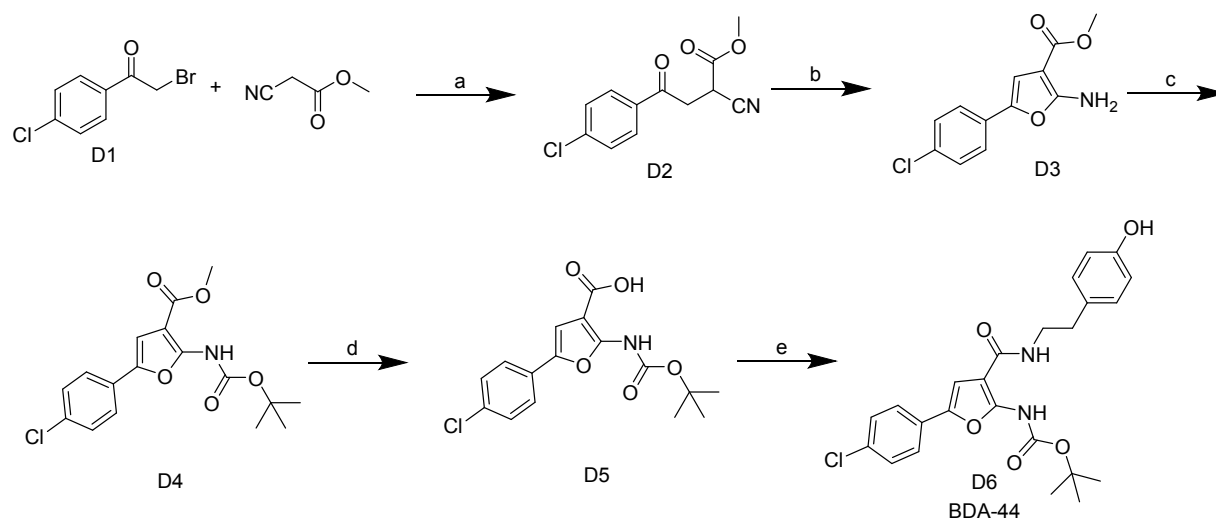

1296 <sup>a</sup>Reagents and conditions: (a)  $Et_2HN$ , DMF,  $N_2$ , 40 °C, 2 h; (b) TFA, DCM, rt, 16 h; (c)  $Boc_2O$ ,  
1297 DMAP, Dioxane, 60 °C, 4 h; (d) NaOH, MeOH :  $H_2O$  : THF = 2 : 2 : 1, 80 °C, 6 h; (e) HATU,  
1298 DCM, rt, 12 h.

1299

1300 **General Procedure for Preparing the products Using Method C**

1301 **As Described in Scheme 3.**

1302 **Step 1”:**

1303 To a solution of 2-bromo-1-(4-chlorophenyl) ethan-1-one (2.33 g, 10.0 mmol, 1.0 eq) and methyl  
1304 2-cyanoacetate (0.9 mL, 10.0 mmol, 1.0 eq) in dry DMF (20 mL) was added diethylamine (2.0 mL,  
1305 20.0 mmol, 2.0 eq). The reaction mixture was stirred at room temperature for 2 h under  $N_2$   
1306

1307 atmosphere. The mixture was then diluted with DCM (100 mL), poured into water and washed  
1308 with 2N HCl. The organic phase was extracted with DCM (100 mL x 3), then washed with water  
1309 and brine. The organic layer was dried over MgSO<sub>4</sub>, filtered and concentrated under reduced  
1310 pressure. The residue was purified by column chromatography on silica gel using EtOAc–PE (10%  
1311 → 75%) as an eluent to give the final product (1.7 g, 68%) as brown solid.

1312  
1313 **Step 2”:**  
1314 Trifluoroacetic acid (15 mL) was added in one portion to intermediate D2 (1.0 g, 4.0 mmol, 1.0 eq)  
1315 in DCM (15 mL) at room temperature. The reaction was stirred for 16 h and the solvents removed  
1316 under vacuum. The residue was extracted with EtOAc (100 mL x 3), then washed with water and  
1317 brine. The organic layer was dried over MgSO<sub>4</sub>, filtered and concentrated under reduced pressure.  
1318 The residue was purified by column chromatography on silica gel using EtOAc–PE (30% → 100%)  
1319 as an eluent to give the final product (0.8 g, 80%) as brown solid.

1320  
1321 **Step 3”:**  
1322 To a solution of intermediate D3 (0.75 g, 3.0 mmol, 1.0 eq) in dioxane (40 mL), Boc<sub>2</sub>O (0.72 g,  
1323 3.3 mmol, 1.1 eq) and DMAP (39 mg, 0.33 mmol, 0.1 eq) were added. The reaction mixture was  
1324 stirred at 60 °C for 4 h. After cooling to room temperature the solvent was removed under reduced  
1325 pressure, and the residue was purified by column chromatography on silica gel (EtOAc–heptane  
1326 15 → 65%) to yield product D4 (1.03 g, 98%).

1327  
1328 **Step 4”:**  
1329 The intermediate D4 (0.7 g, 2.0 mmol, 1.0 eq) was subsequently subjected to a base hydrolysis at  
1330 80 °C for 6 h with a solution of NaOH (480 mg, 12.0 mmol, 6.0 eq) in 20 mL of a solvent mixture  
1331 (MeOH–H<sub>2</sub>O–THF = 2:2:1). The reaction was cooled to room temperature and the organic solvents  
1332 were removed under vacuum. The aqueous layer was acidified with 5% HCl to give a precipitate,  
1333 which was filtered to afford the compound (540 mg, 80%) as red solid.

1334  
1335 **Step 5”:**  
1336 To a solution of intermediate D5 (337 mg, 1.0 mmol, 1.0 eq) and DIPEA (0.6 mL, 3.0 mmol, 3.0  
1337 eq) in DCM (10 mL) was added HATU (420 mg, 1.1 mmol, 1.1eq) and 4-(2-aminoethyl)phenol

1338 (165 mg, 1.2 mmol, 1.2 eq). The reaction mixture was stirred at room temperature for 12 h. The  
 1339 mixture was washed with water and extracted with EtOAc. The organic layer was separated,  
 1340 washed with water and brine, dried over MgSO<sub>4</sub>, filtered and concentrated under reduced pressure.  
 1341 The residue was purified by column chromatography on silica gel using EtOAc–PE (10% → 85%)  
 1342 as an eluent to give the product **BDA-44** (351 mg, 75%) as yellow solid, M.P.= 190 - 195 °C; <sup>1</sup>H  
 1343 NMR (500 MHz, DMSO- *d*<sub>6</sub>) δ 9.62 (s, 1H), 9.20 (s, 1H), 8.17 (t, J = 5.9 Hz, 1H), 7.59 (d, J = 8.7  
 1344 Hz, 2H), 7.52 (d, J = 8.7 Hz, 2H), 7.29 (s, 1H), 7.03 (d, J = 8.5 Hz, 2H), 6.69 (d, J = 8.5 Hz, 2H),  
 1345 3.36 (s, 2H), 2.70 (t, J = 7.5 Hz, 2H), 1.48 (s, 9H). <sup>13</sup>C NMR (126 MHz, DMSO- *d*<sub>6</sub>) δ 162.77,  
 1346 156.15, 151.32, 148.80, 145.72, 132.29, 129.95, 129.82, 128.76, 125.02, 115.58, 106.23, 105.55,  
 1347 81.31, 34.89, 28.37, 28.20. HRMS (ESI) *m/z* calculated for C<sub>24</sub>H<sub>25</sub>ClN<sub>2</sub>O<sub>5</sub> [M+H]<sup>+</sup>: 457.1525;  
 1348 found [M+H]<sup>+</sup>: 457.1528.

1349

1350 **Scheme 4. Syntheses of compounds BDA-36, BDA-64, BDA-68.**<sup>a</sup>

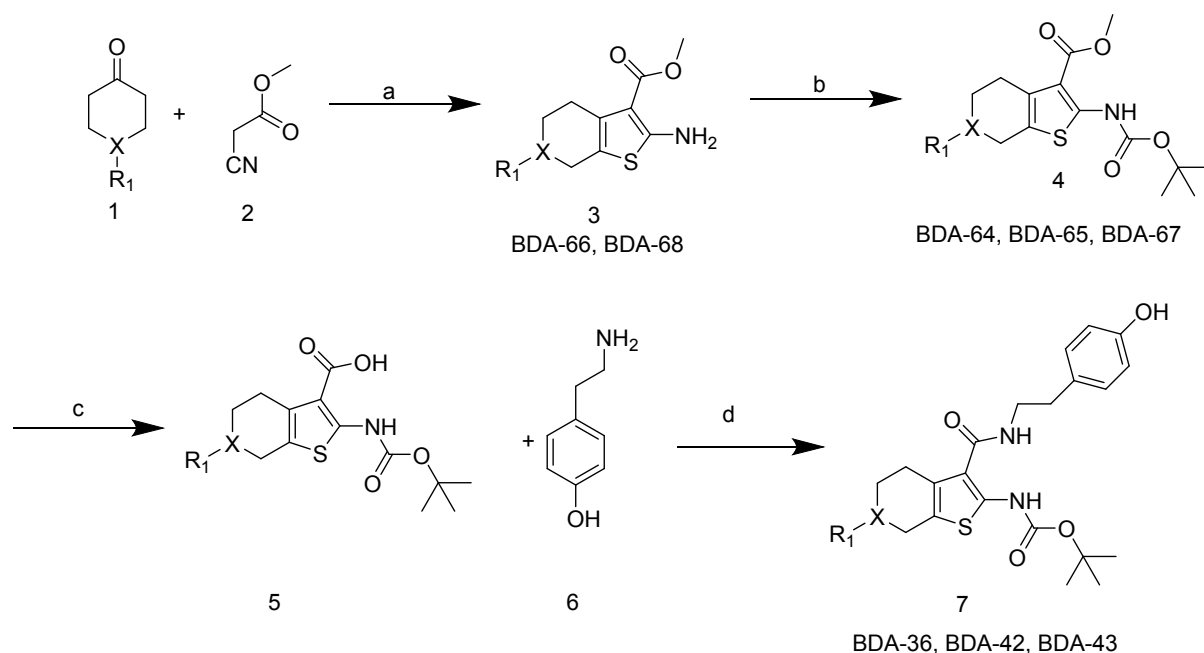

1351 <sup>a</sup>Reagents and conditions: (a) S, Et<sub>2</sub>HN, MeOH, 25 °C, 24 h; (b) Boc<sub>2</sub>O, DMAP, Dioxane, 60 °C,  
 1352 4 h; (c) NaOH, MeOH : H<sub>2</sub>O : THF = 2 : 2 : 1, 80 °C, 6 h; (d) HATU, DCM, rt, 12 h;

1354

1355 **General Procedure for Preparing the Products Using Method D**

1356 **As Described in Scheme 4.**

1357 **Step 1''':**

1358 A 100 mL round bottom flask was charged with 1-benzylpiperidin-4-one (**1c**, 1.89 g, 10 mmol, 1.0  
1359 eq), methyl 2-cyanoacetate (**2a**, 0.97 mL (1.09 g), 11 mmol, 1.1 eq), sulfur (385 mg, 12 mmol, 1.2  
1360 eq), and diethylamine (0.52 mL (366 mg), 5.0 mmol, 0.5 eq) in methanol (20 mL). The reaction is  
1361 heated 25 °C in an oil bath for 24 h. Then, the reaction was cooled down to room temperature. A  
1362 batch of 120 mL ice water was poured into the mixture to yield a precipitate which was filtered and  
1363 washed with cold ethanol to obtain 8.1 g (68%) of the title compound **3** as light yellow powder.

1364

1365 **BDA-66: Methyl 2-amino-6-phenyl-4,5,6,7-tetrahydrobenzo[b]thiophene-3 carboxylate.**

1366 The compounds **BDA-66** was synthesized according to step **1**, and yielded final compound (488  
1367 mg, 85%) yellow solid, M.P.= 187 - 192 °C; <sup>1</sup>H NMR (500 MHz, CDCl<sub>3</sub>) δ 7.39 – 7.31 (m, 2H),  
1368 7.30 – 7.23 (m, 3H), 5.99 (s, 2H), 3.83 (s, 3H), 3.08 – 2.94 (m, 2H), 2.86 – 2.64 (m, 3H), 2.18 –  
1369 2.07 (m, 1H), 2.00 – 1.84 (m, 1H). <sup>13</sup>C NMR (126 MHz, CDCl<sub>3</sub>) δ 166.46, 162.08, 146.08, 132.23,  
1370 128.48, 126.90, 126.32, 117.05, 105.47, 50.65, 40.88, 32.39, 30.08, 27.22. HRMS (ESI) m/z  
1371 calculated for C<sub>16</sub>H<sub>17</sub>NO<sub>2</sub>S [M+H]<sup>+</sup>: 288.1024; found [M+H]<sup>+</sup>: 288.1026.

1372

1373 **BDA-68: Methyl 2-amino-6-benzyl-4,5,6,7-tetrahydrothieno[2,3-c]pyridine-3-carboxylate.**

1374 The compounds **BDA-68** was synthesized according to step **1**, and yielded final compound (544  
1375 mg, 90%) yellow solid, M.P.= 189 - 195 °C; <sup>1</sup>H NMR (500 MHz, CDCl<sub>3</sub>) δ 7.42 – 7.38 (m, 2H),  
1376 7.37 – 7.33 (m, 2H), 7.31 – 7.29 (m, 1H), 5.95 (s, 2H), 3.81 (s, 3H), 3.71 (s, 2H), 3.44 (t, J = 2.0  
1377 Hz, 2H), 2.84 (td, J = 5.4, 2.6 Hz, 2H), 2.78 (t, J = 5.7 Hz, 2H). <sup>13</sup>C NMR (126 MHz, CDCl<sub>3</sub>) δ  
1378 166.32, 162.16, 138.24, 131.07, 129.12, 128.33, 127.19, 114.96, 61.98, 51.28, 50.64, 50.24, 27.18.  
1379 HRMS (ESI) m/z calculated for C<sub>16</sub>H<sub>18</sub>N<sub>2</sub>O<sub>2</sub>S [M+H]<sup>+</sup>: 303.1132; found [M+H]<sup>+</sup>: 303.1136.

1380

1381 **Step 2, Step 3, Step 4** according to the method **A**.

1382

1383 **BDA-64: Methyl 6-benzyl-2-((tert-butoxycarbonyl)amino)-4,5,6,7 tetrahydrothieno**  
1384 **[2,3-c]pyridine-3-carboxylate.**

1385 The compounds **BDA-64** was synthesized according to step **2**, and yielded final compound (765  
1386 mg, 95%) yellow solid, M.P.= 185 - 190 °C; <sup>1</sup>H NMR (500 MHz, CDCl<sub>3</sub>) δ 10.26 (s, 1H), 7.42 –  
1387 7.33 (m, 4H), 7.32 – 7.29 (m, 1H), 3.86 (s, 3H), 3.72 (s, 2H), 3.57 (s, 2H), 2.86 (d, J = 7.4 Hz, 2H),  
1388 2.78 (t, J = 6.0 Hz, 2H), 1.54 (s, 9H). <sup>13</sup>C NMR (126 MHz, CDCl<sub>3</sub>) δ 166.55, 150.53, 138.13,

1389 129.62, 129.12, 128.36, 128.10, 127.25, 122.69, 109.48, 82.03, 61.83, 51.32, 51.25, 49.96, 28.23,  
1390 26.69. HRMS (ESI) m/z calculated for C<sub>21</sub>H<sub>26</sub>N<sub>2</sub>O<sub>4</sub>S [M+H]<sup>+</sup>: 403.1621; found [M+H]<sup>+</sup>: 403.1624.  
1391

1392 **BDA-65: Methyl 2-((tert-butoxycarbonyl)amino)-6-phenyl-4,5,6,7-tetrahydrobenzo[b]**  
1393 **thiophene-3-carboxylate.**

1394 The compounds **BDA-65** was synthesized according to step **2**, and yielded final compound (743  
1395 mg, 96%) yellow solid, M.P.= 184 - 190 °C; <sup>1</sup>H NMR (500 MHz, CDCl<sub>3</sub>) δ 10.33 (s, 1H), 7.37 –  
1396 7.33 (m, 2H), 7.30 (d, J = 1.6 Hz, 2H), 7.28 – 7.23 (m, 1H), 3.88 (s, 3H), 3.10 – 2.97 (m, 2H), 2.93  
1397 (dd, J = 16.2, 5.3 Hz, 1H), 2.84 – 2.73 (m, 2H), 2.17 – 2.09 (m, 1H), 2.01 – 1.85 (m, 1H), 1.55 (s,  
1398 9H). <sup>13</sup>C NMR (126 MHz, CDCl<sub>3</sub>) δ 162.76, 150.98, 145.60, 143.81, 134.27, 133.70, 128.54,  
1399 126.87, 126.45, 126.33, 83.27, 51.39, 40.37, 32.72, 29.78, 27.88, 26.29. HRMS (ESI) m/z  
1400 calculated for C<sub>21</sub>H<sub>25</sub>NO<sub>4</sub>S [M+H]<sup>+</sup>: 388.1521; found [M+H]<sup>+</sup>: 388.1527.  
1401

1402 **BDA-67: Methyl 2-((tert-butoxycarbonyl)amino)-4,5,6,7-tetrahydrobenzo[b]**  
1403 **thiophene-3-carboxylate.**

1404 The compounds **BDA-67** was synthesized according to step **2**, and yielded final compound (610  
1405 mg, 98%) yellow solid, M.P.= 183 - 189 °C; <sup>1</sup>H NMR (500 MHz, CDCl<sub>3</sub>) δ 10.29 (s, 1H), 3.85 (s,  
1406 3H), 2.78 – 2.71 (m, 2H), 2.63 – 2.58 (m, 2H), 1.77 (t, J = 7.9 Hz, 4H), 1.53 (s, 9H). <sup>13</sup>C NMR  
1407 (126 MHz, CDCl<sub>3</sub>) δ 166.74, 166.34, 152.15, 150.00, 149.86, 131.01, 130.93, 125.08, 110.06,  
1408 109.88, 81.76, 60.18, 51.16, 28.21, 26.44, 26.35, 24.30, 24.28, 23.01, 22.86, 22.81, 14.31. HRMS  
1409 (ESI) m/z calculated for C<sub>21</sub>H<sub>25</sub>NO<sub>4</sub>S [M+H]<sup>+</sup>: 312.1215; found [M+H]<sup>+</sup>: 312.1218.  
1410

1411 **BDA-36: Tert-butyl (6-benzyl-3-((4-hydroxyphenethyl)carbamoyl)-4,5,6,7**  
1412 **tetrahydrothieno[2,3-c]pyridin-2-yl)carbamate.**

1413 The compounds **BDA-36** was synthesized according to step **4**, and yielded final compound (200  
1414 mg, 79%) yellow solid, M.P.= 189 - 195 °C; <sup>1</sup>H NMR (500 MHz, CDCl<sub>3</sub>) δ 11.00 (s, 1H), 7.38 (d,  
1415 J = 4.7 Hz, 4H), 7.35 – 7.31 (m, 1H), 7.10 – 7.05 (m, 2H), 6.79 – 6.75 (m, 2H), 5.71 (t, J = 5.4 Hz,  
1416 1H), 3.70 (s, 2H), 3.68 – 3.60 (m, 2H), 3.58 (s, 2H), 2.84 (t, J = 6.7 Hz, 2H), 2.74 – 2.66 (m, 2H),  
1417 2.46 – 2.37 (m, 2H), 1.52 (s, 9H). <sup>13</sup>C NMR (126 MHz, CDCl<sub>3</sub>) δ 165.97, 154.59, 147.96, 137.70,  
1418 130.49, 129.98, 129.23, 128.45, 127.43, 125.88, 123.35, 115.70, 111.96, 61.69, 51.41, 49.51, 40.57,

1419 34.40, 29.72, 28.27, 26.54. HRMS (ESI) m/z calculated for C<sub>28</sub>H<sub>33</sub>N<sub>3</sub>O<sub>4</sub>S [M+H]<sup>+</sup>: 508.2236;  
1420 found [M+H]<sup>+</sup>: 508.2237.

1421  
1422 **BDA-42: Tert-butyl (3-((4-hydroxyphenethyl)carbamoyl)-6-phenyl-4,5,6,7**  
1423 **tetrahydrobenzo[b]thiophen-2-yl)carbamate.**

1424 The compounds **BDA-42** was synthesized according to step 4, and yielded final compound (182  
1425 mg, 74%) yellow solid, M.P.= 185 - 190 °C; <sup>1</sup>H NMR (500 MHz, CDCl<sub>3</sub>) δ 11.07 (s, 1H), 10.28  
1426 (s, 1H), 7.37 (t, *J* = 7.6 Hz, 1H), 7.34 – 7.28 (m, 5H), 7.23 (dt, *J* = 24.4, 7.3 Hz, 2H), 7.16 – 7.13  
1427 (m, 1H), 5.85 (t, *J* = 5.8 Hz, 1H), 3.82 – 3.64 (m, 1H), 3.16 (d, *J* = 22.5 Hz, 1H), 3.08 – 2.86 (m,  
1428 5H), 2.86 – 2.75 (m, 1H), 2.52 (d, *J* = 15.4 Hz, 1H), 2.11 (d, *J* = 12.1 Hz, 1H), 1.94 (d, *J* = 8.0 Hz,  
1429 1H), 1.53 (d, *J* = 13.7 Hz, 9H). <sup>13</sup>C NMR (126 MHz, CDCl<sub>3</sub>) δ 166.23, 164.91, 152.55, 152.40,  
1430 149.05, 147.87, 145.72, 145.25, 136.59, 130.56, 129.88, 128.58, 128.56, 126.93, 126.82, 126.57,  
1431 126.47, 125.56, 125.13, 122.18, 112.20, 108.81, 82.24, 81.49, 40.63, 40.59, 40.08, 34.95, 32.21,  
1432 32.04, 32.02, 29.99, 28.29, 28.17, 26.88, 26.64. HRMS (ESI) m/z calculated for C<sub>28</sub>H<sub>32</sub>N<sub>2</sub>O<sub>4</sub>S  
1433 [M+H]<sup>+</sup>: 493.2103; found [M+H]<sup>+</sup>: 493.2108.

1434  
1435 **BDA-43: Tert-butyl (3-((4-hydroxyphenethyl) carbamoyl)-4,5,6,7-tetrahydrobenzo**  
1436 **[b]thiophen-2-yl) carbamate.**

1437 The compounds **BDA-43** was synthesized according to step 4, and yielded final compound (168  
1438 mg, 81%) yellow solid, M.P.= 182 - 188 °C; <sup>1</sup>H NMR (500 MHz, CDCl<sub>3</sub>) δ 11.05 (s, 1H), 10.27  
1439 (s, 1H), 7.33 – 7.29 (m, 2H), 7.16 – 7.11 (m, 2H), 5.85 (t, *J* = 5.8 Hz, 1H), 3.71 (q, *J* = 6.9 Hz, 2H),  
1440 2.97 (t, *J* = 6.9 Hz, 2H), 2.92 (d, <sup>13</sup>C NMR (126 MHz, CDCl<sub>3</sub>) δ 166.30, 165.00, 152.53, 152.05,  
1441 149.08, 147.46, 136.54, 130.78, 129.83, 127.15, 125.99, 125.61, 122.18, 112.41, 109.03, 82.04,  
1442 81.33, 40.60, 34.98, 28.28, 28.17, 26.54, 26.52, 24.36, 24.28, 22.99, 22.90, 22.82, 22.62. HRMS  
1443 (ESI) m/z calculated for C<sub>22</sub>H<sub>28</sub>N<sub>2</sub>O<sub>4</sub>S [M+H]<sup>+</sup>: 417.1833; found [M+H]<sup>+</sup>: 417.1837.

1444  
1445

1446

1447

1448

1449



1450  $^1\text{H}$  NMR spectrum of **BDA-01** (500 MHz,  $\text{CDCl}_3$ )

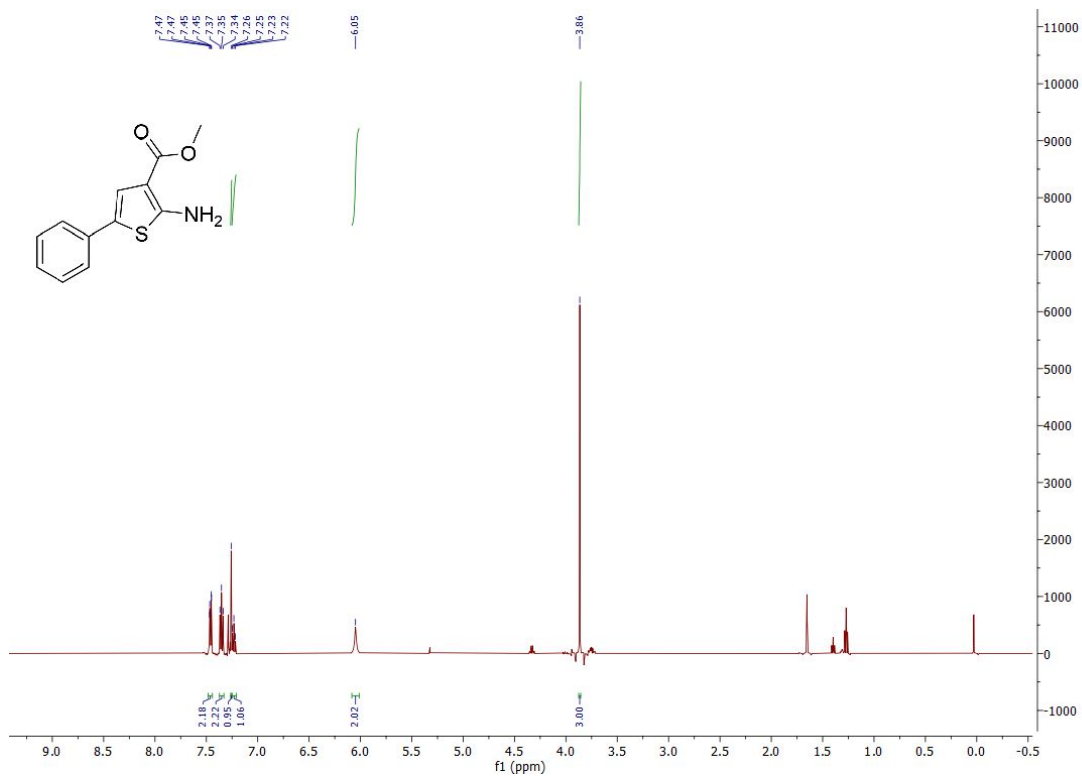

1451

1452  $^{13}\text{C}\{^1\text{H}\}$  NMR spectrum of **BDA-01** (126 MHz,  $\text{CDCl}_3$ )

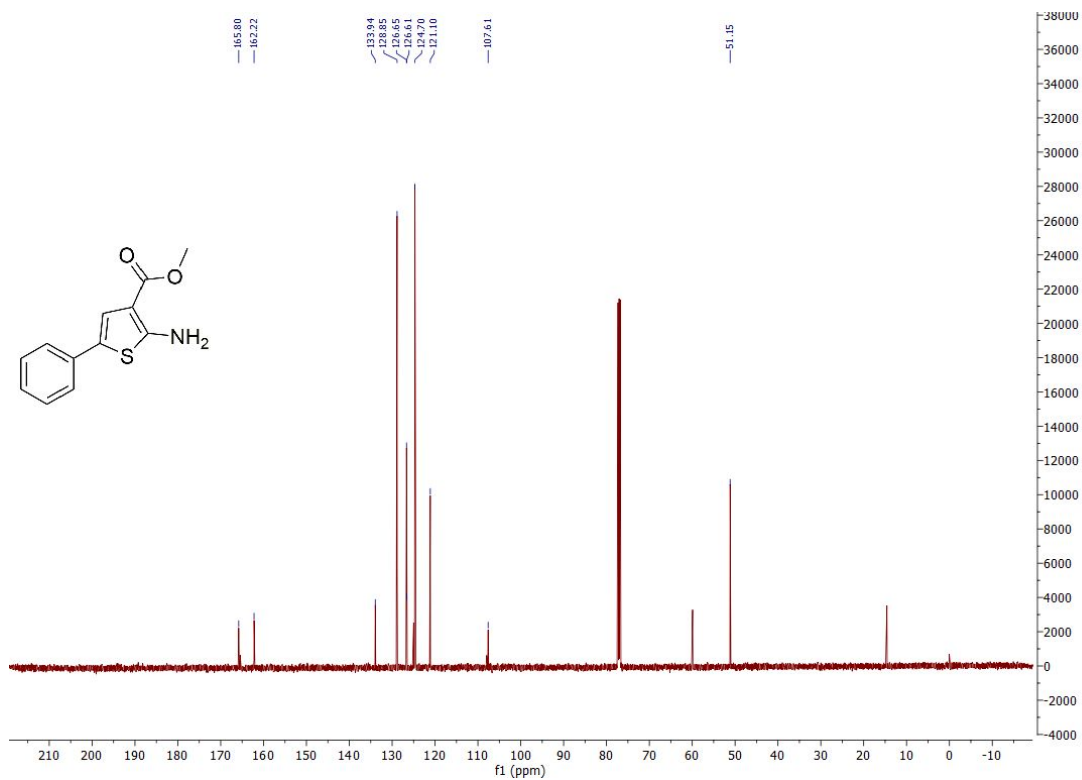

1453

1454

1455  $^1\text{H}$  NMR spectrum of **BDA-02** (500 MHz,  $\text{CDCl}_3$ )

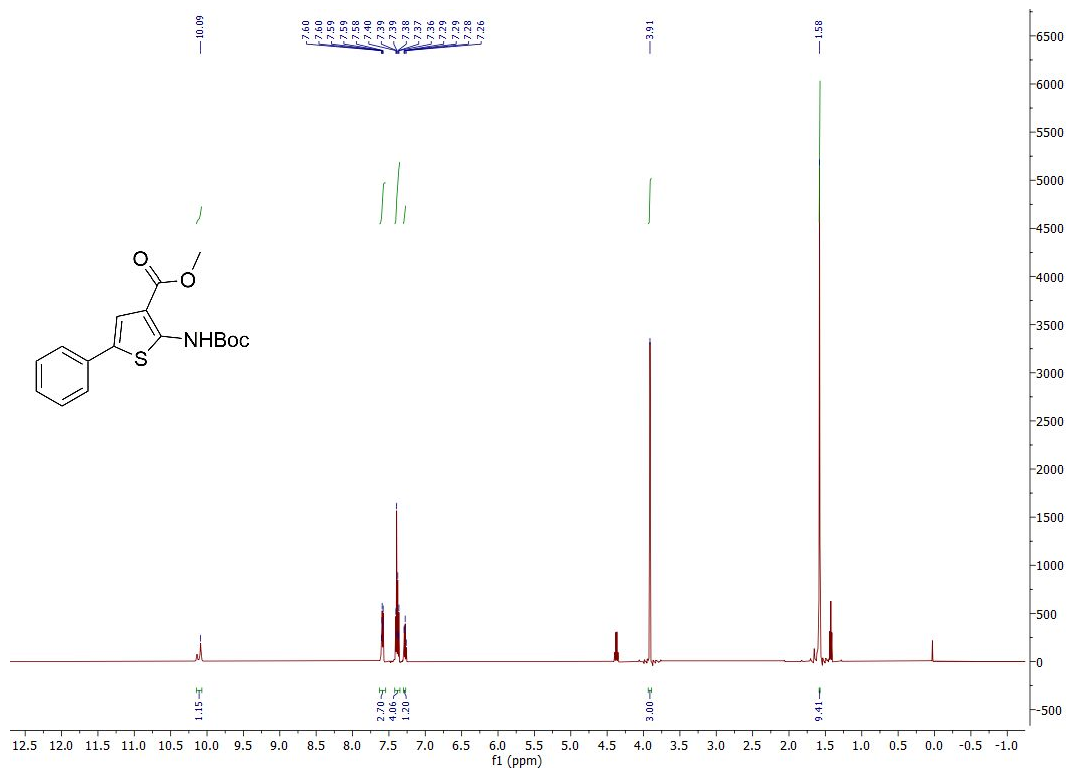

1456

1457  $^{13}\text{C}\{^1\text{H}\}$  NMR spectrum of **BDA-02** (126 MHz,  $\text{CDCl}_3$ )

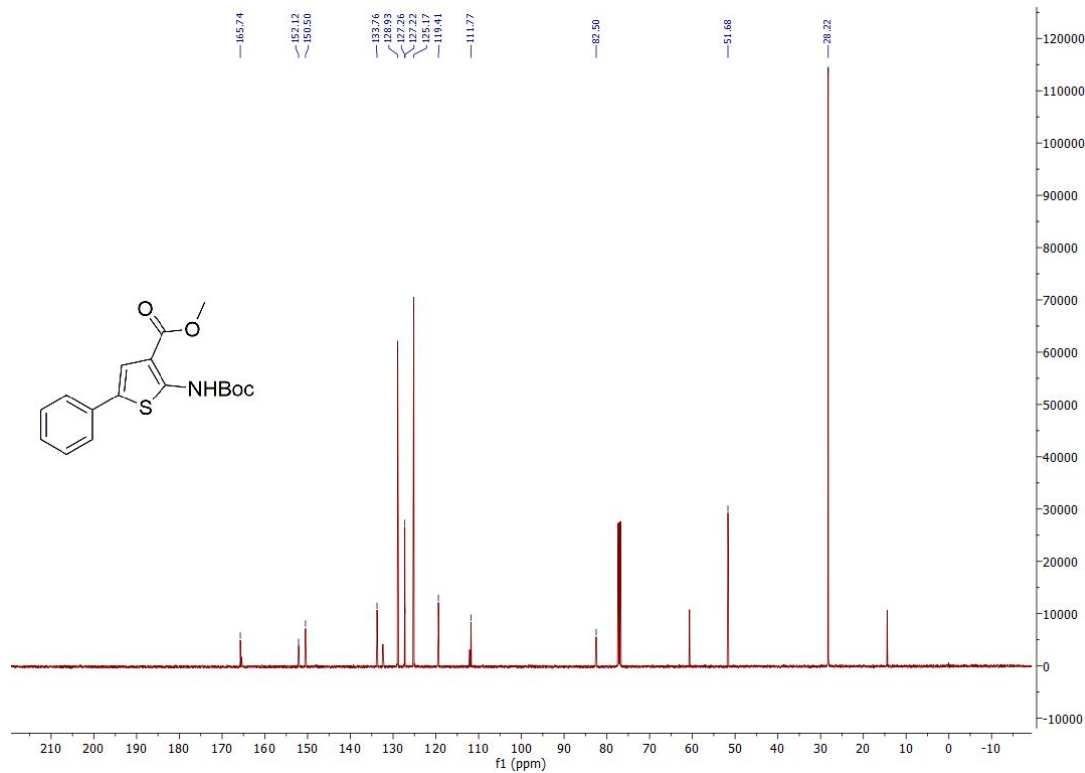

1458

1459

1460  $^1\text{H}$  NMR spectrum of **BDA-03** (500 MHz,  $\text{DMSO-d}_6$ )

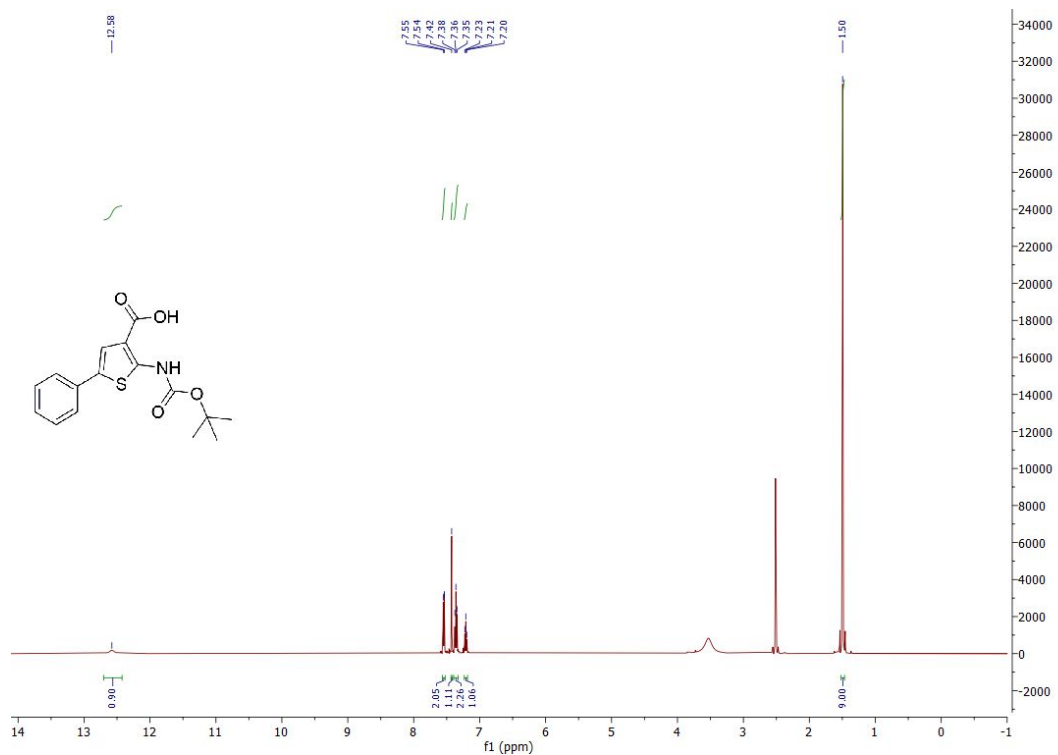

1461

1462  $^{13}\text{C}\{^1\text{H}\}$  NMR spectrum of **BDA-03** (126 MHz,  $\text{DMSO-d}_6$ )

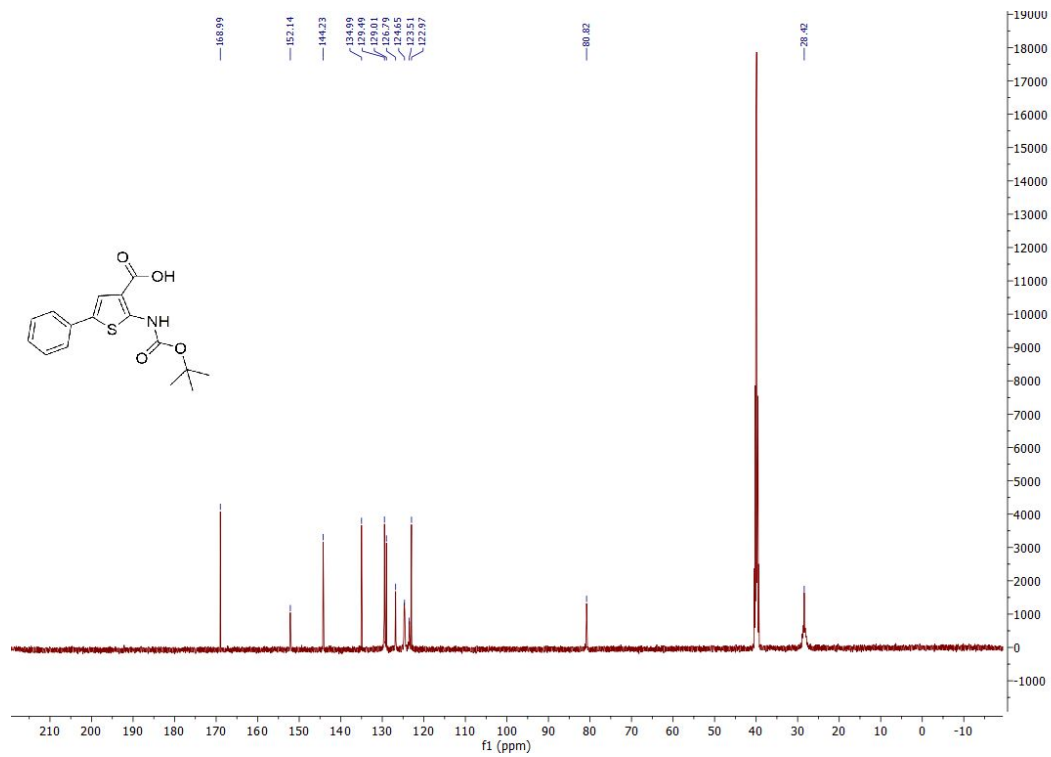

1463

1464

1465  $^1\text{H}$  NMR spectrum of **BDA-04** (500 MHz,  $\text{CDCl}_3$ )

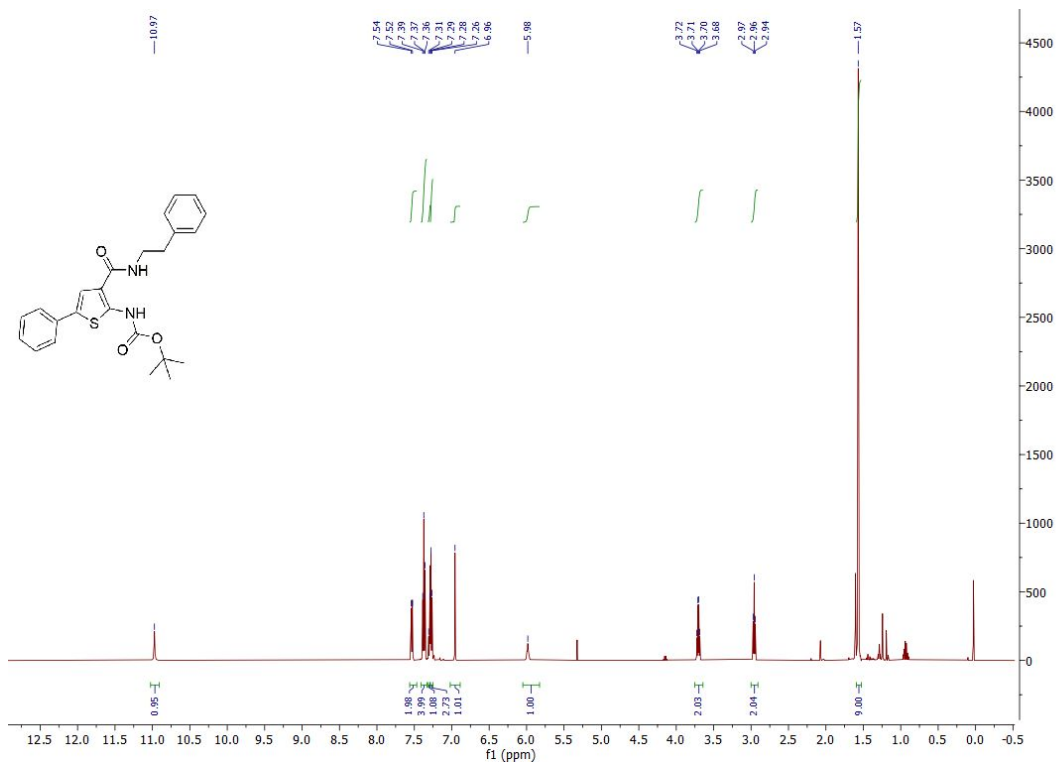

1466

1467  $^{13}\text{C}\{^1\text{H}\}$  NMR spectrum of **BDA-04** (126 MHz,  $\text{CDCl}_3$ )

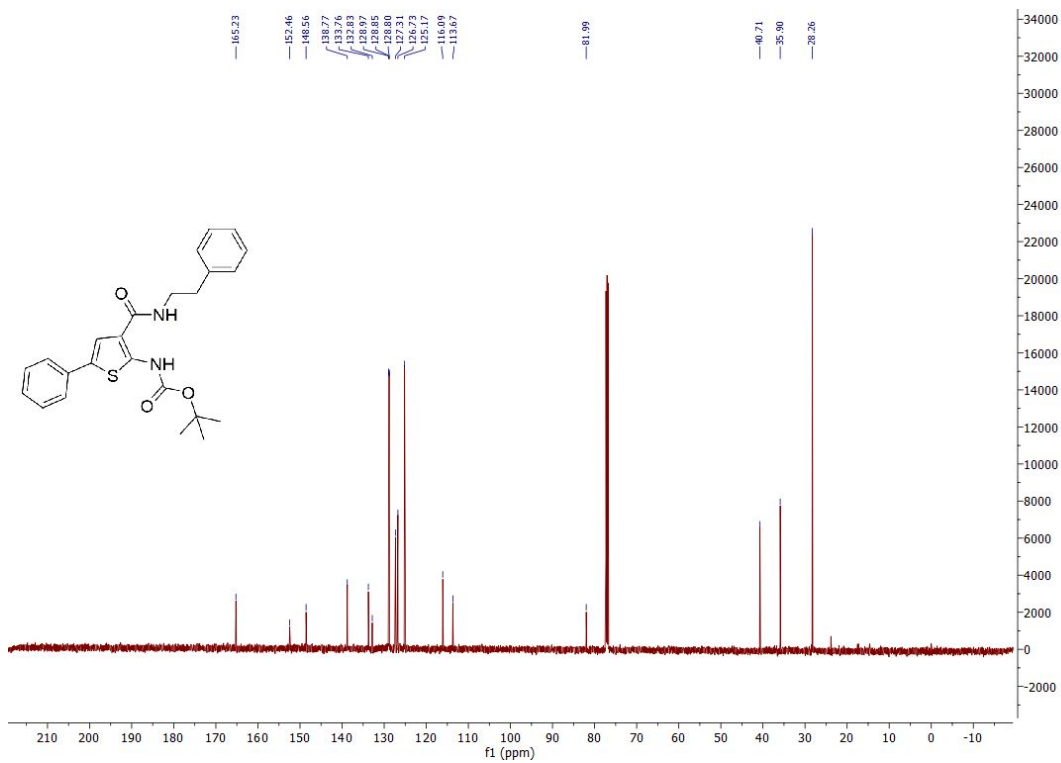

1468

1469

1470  $^1\text{H}$  NMR spectrum of **BDA-05** (500 MHz,  $\text{CDCl}_3$ )

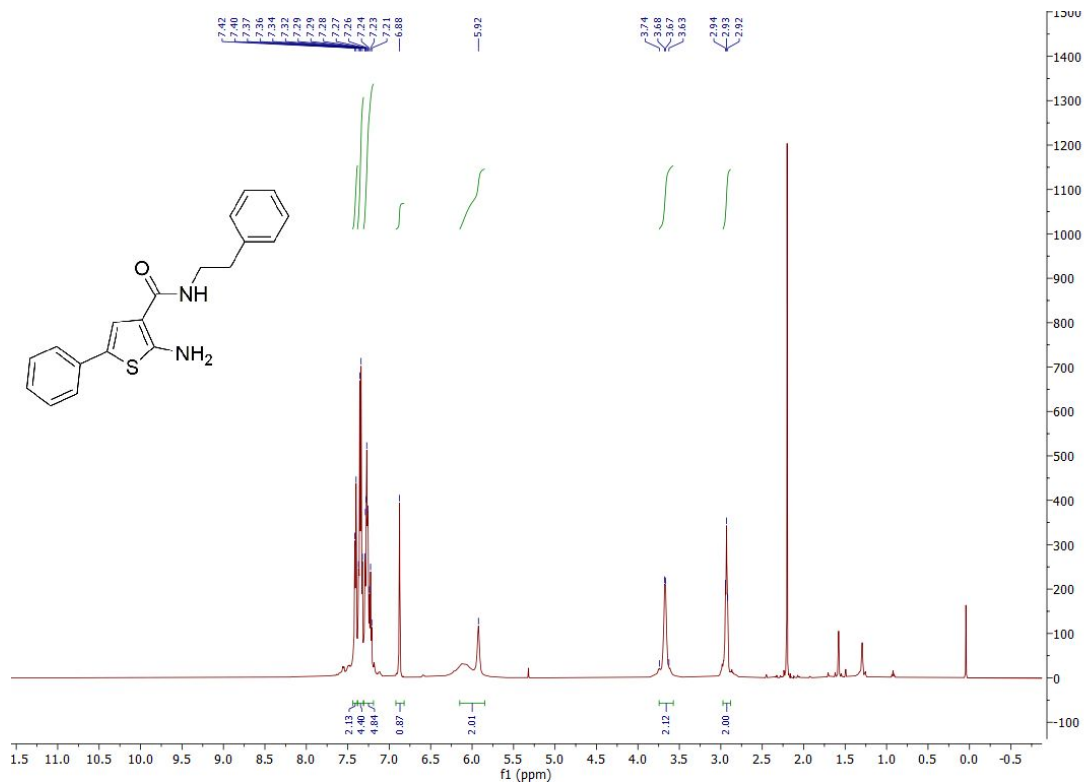

1471

1472  $^{13}\text{C}\{^1\text{H}\}$  NMR spectrum of **BDA-05** (126 MHz,  $\text{CDCl}_3$ )

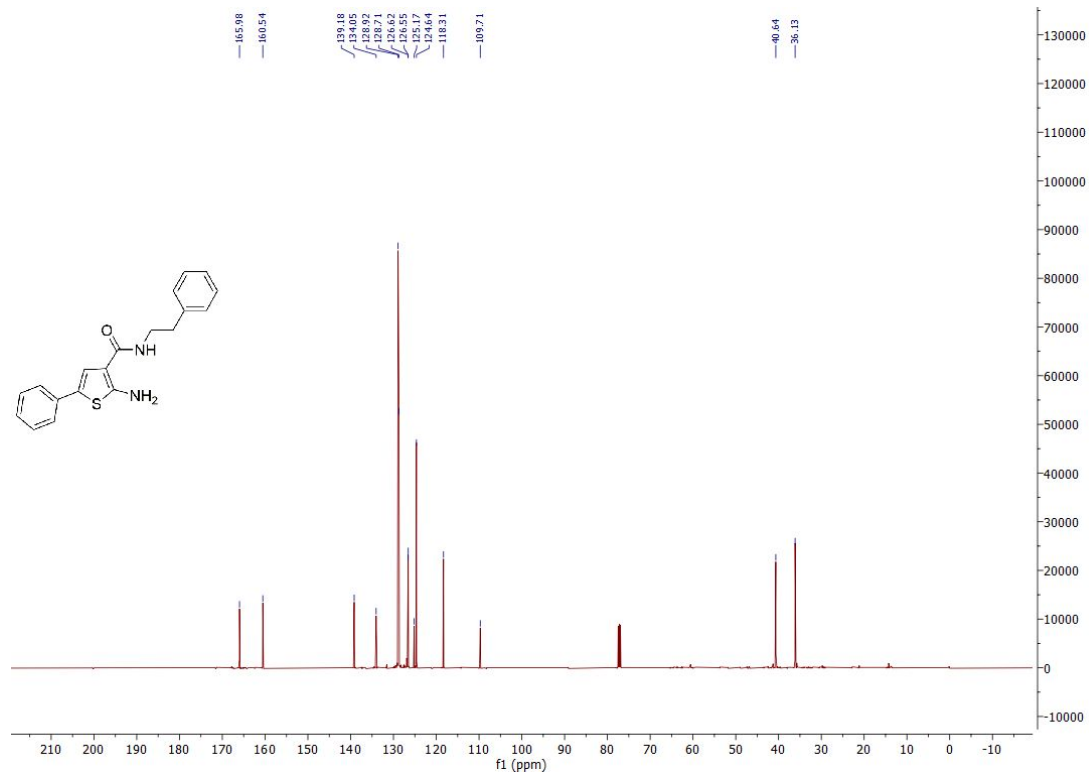

1473

1474

1475  $^1\text{H}$  NMR spectrum of **BDA-06** (500 MHz, DMSO- $d_6$ )

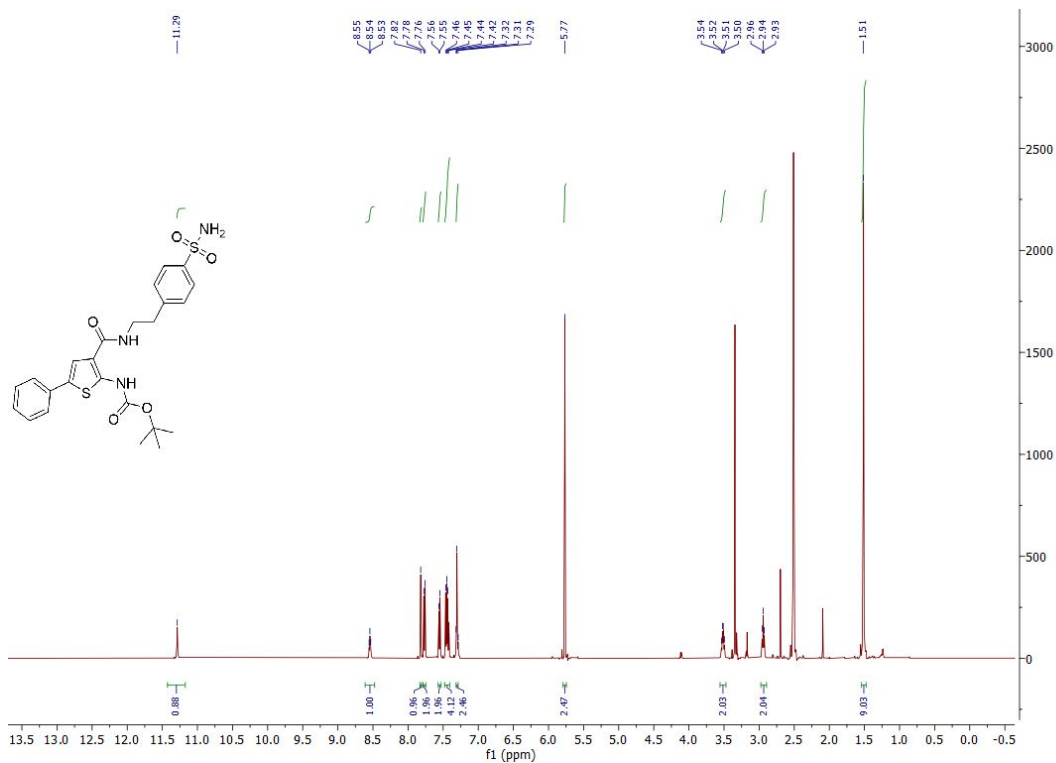

1476

1477  $^{13}\text{C}\{^1\text{H}\}$  NMR spectrum of **BDA-06** (126 MHz, DMSO- $d_6$ )

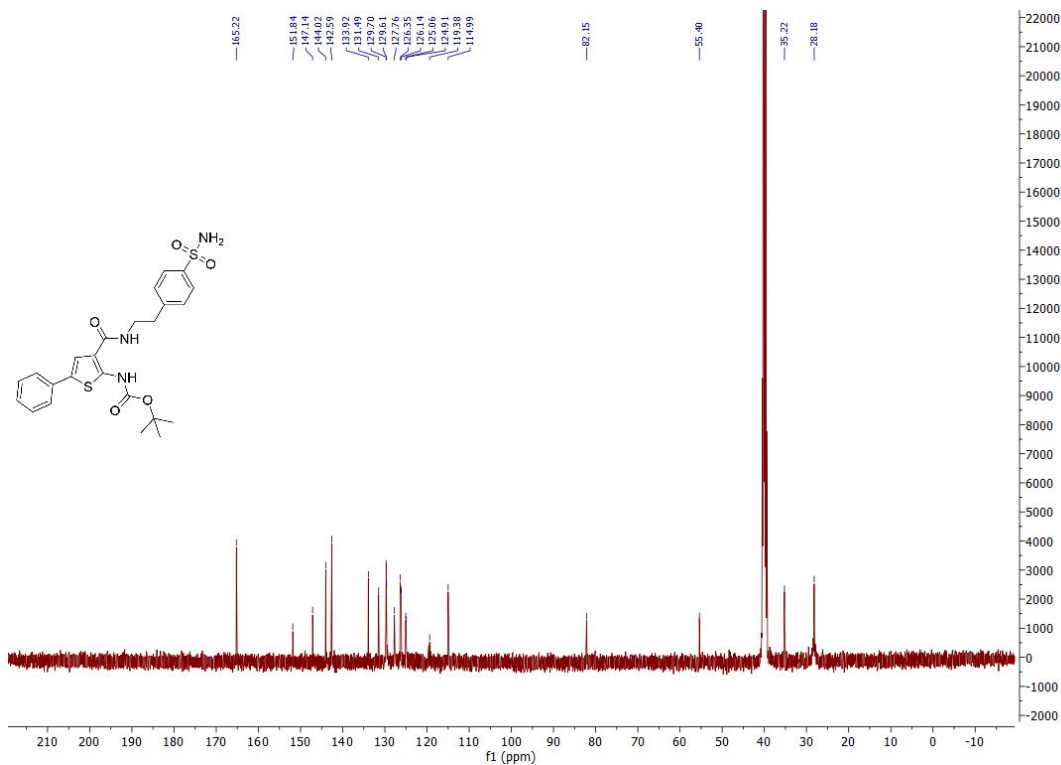

1478

1479

1480  $^1\text{H}$  NMR spectrum of **BDA-07** (500 MHz,  $\text{DMSO-d}_6$ )

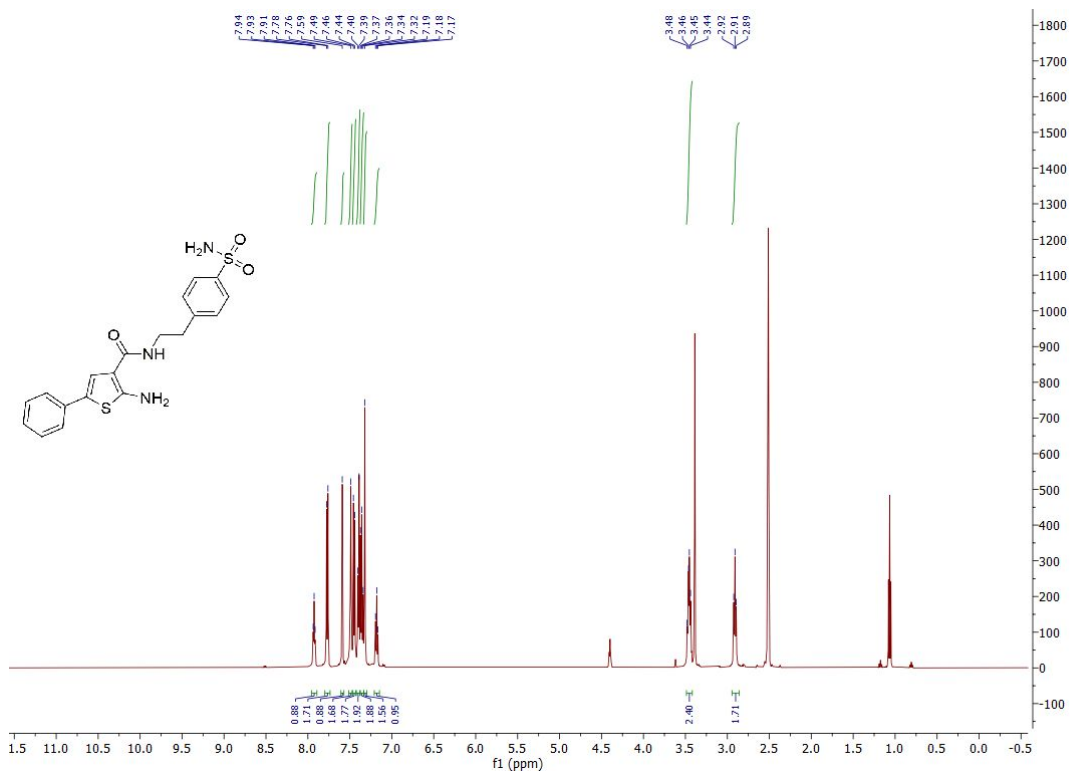

1481

1482  $^{13}\text{C}\{^1\text{H}\}$  NMR spectrum of **BDA-07** (126 MHz,  $\text{DMSO-d}_6$ )

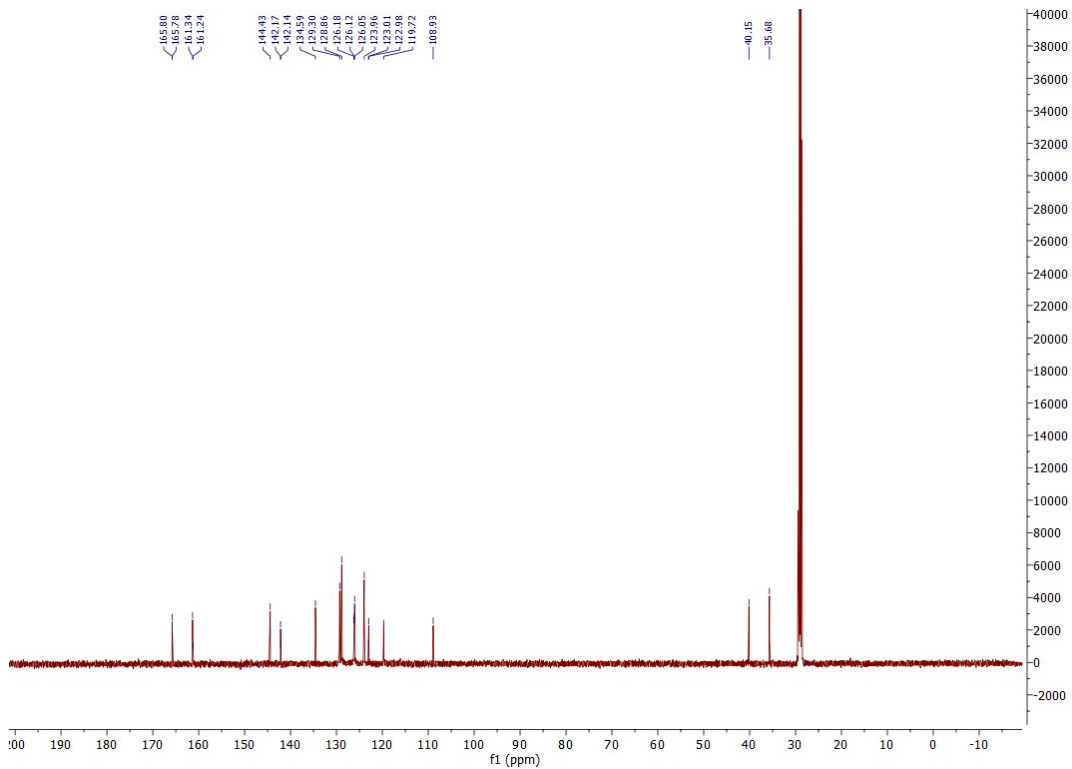

1483

1484

1485  $^1\text{H}$  NMR spectrum of **BDA-08** (500 MHz,  $\text{DMSO-d}_6$ )

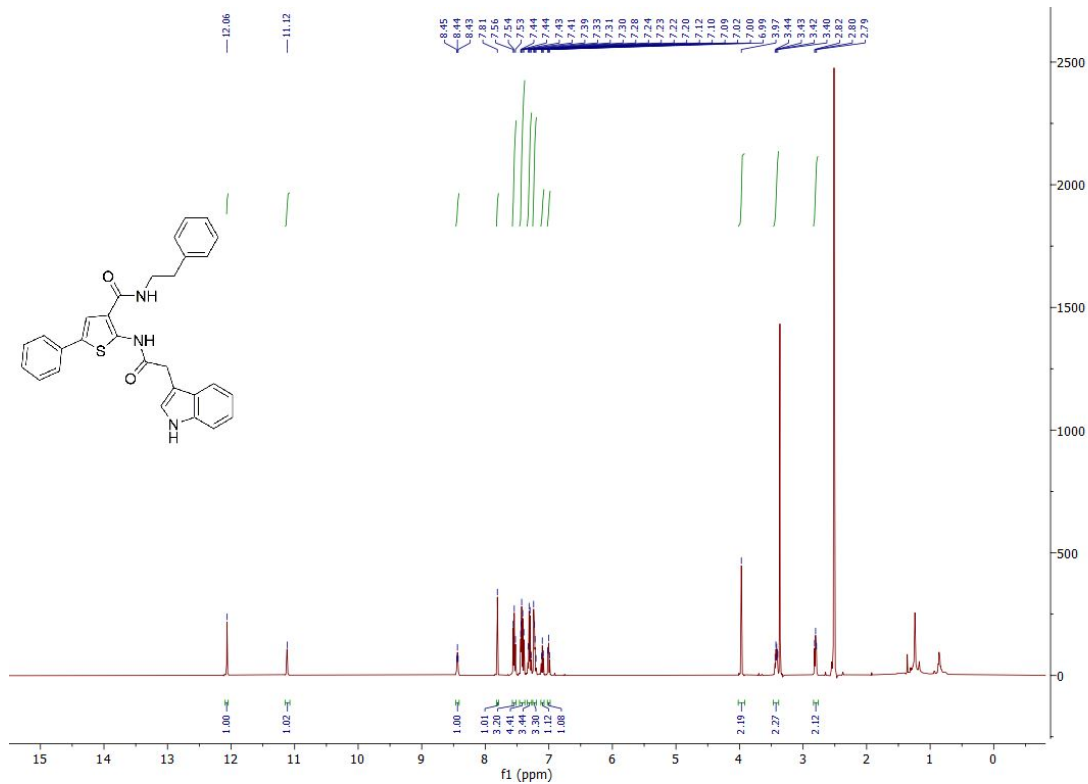

1486

1487  $^{13}\text{C}\{^1\text{H}\}$  NMR spectrum of **BDA-08** (126 MHz,  $\text{DMSO-d}_6$ )

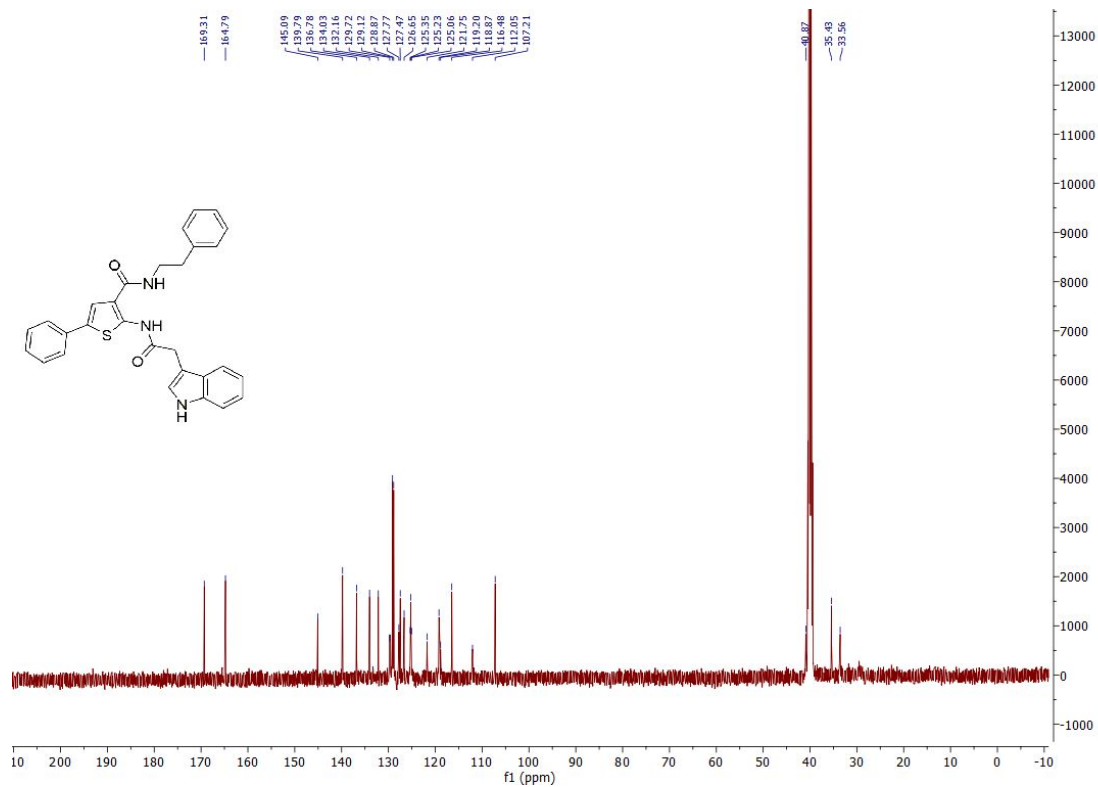

1488



1489  $^1\text{H}$  NMR spectrum of **BDA-09** (500 MHz,  $\text{CDCl}_3$ )

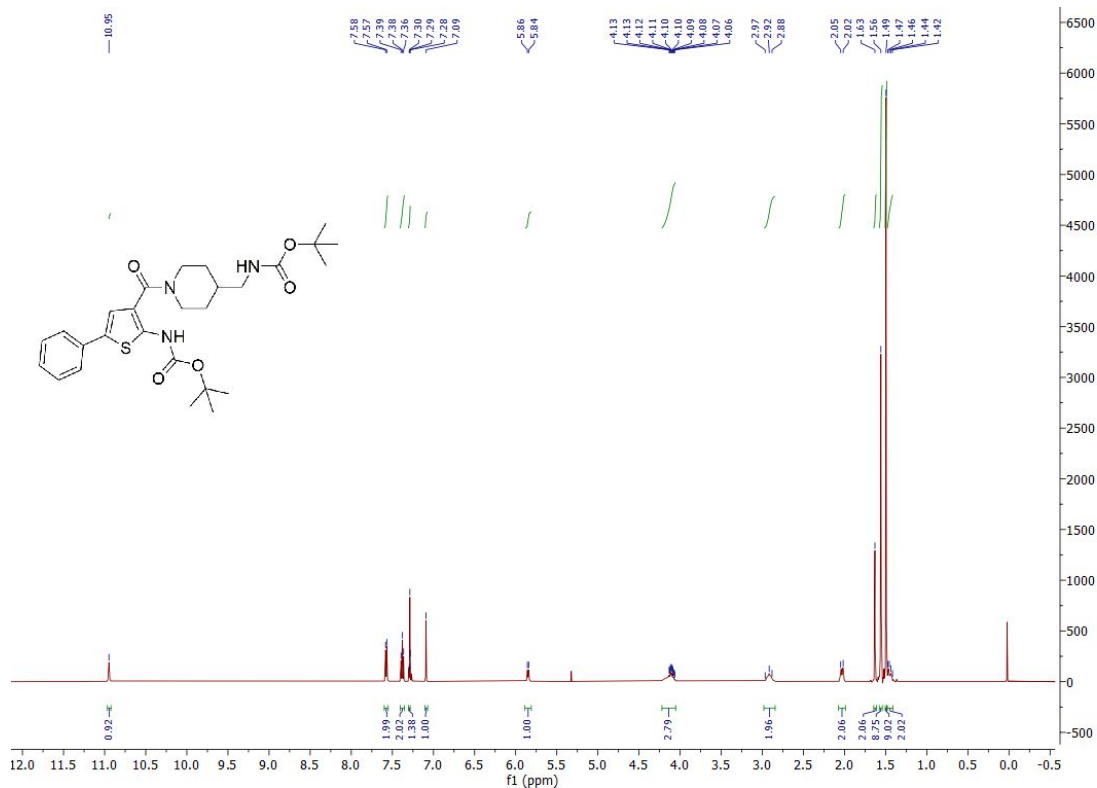

1490

1491  $^{13}\text{C}\{^1\text{H}\}$  NMR spectrum of **BDA-09** (126 MHz,  $\text{CDCl}_3$ )

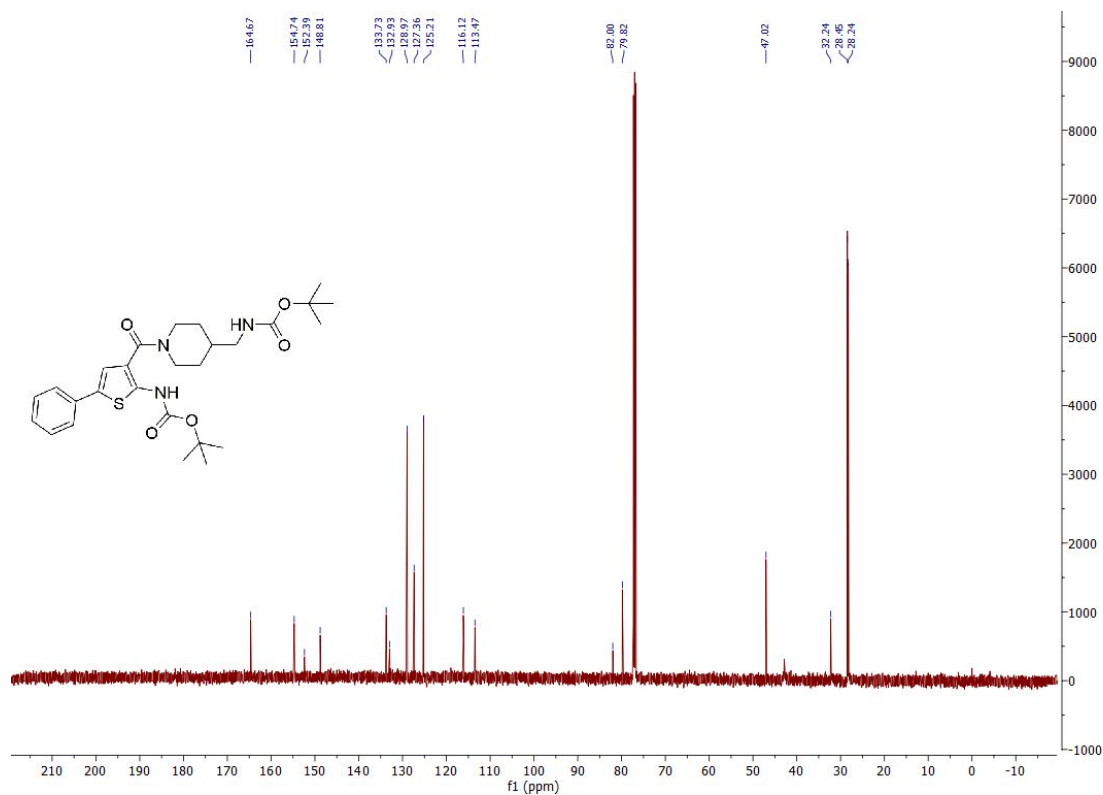

1492

1493  $^1\text{H}$  NMR spectrum of **BDA-10** (500 MHz,  $\text{CDCl}_3$ )

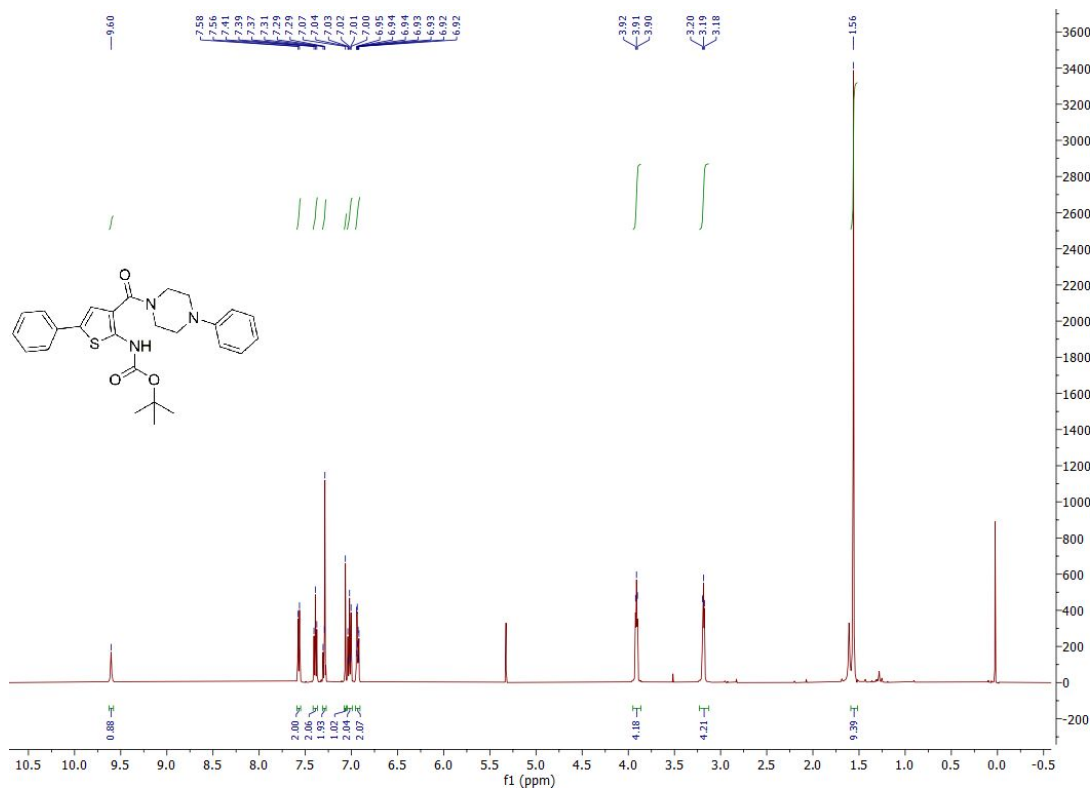

1494

1495  $^{13}\text{C}\{^1\text{H}\}$  NMR spectrum of **BDA-10** (126 MHz,  $\text{CDCl}_3$ )

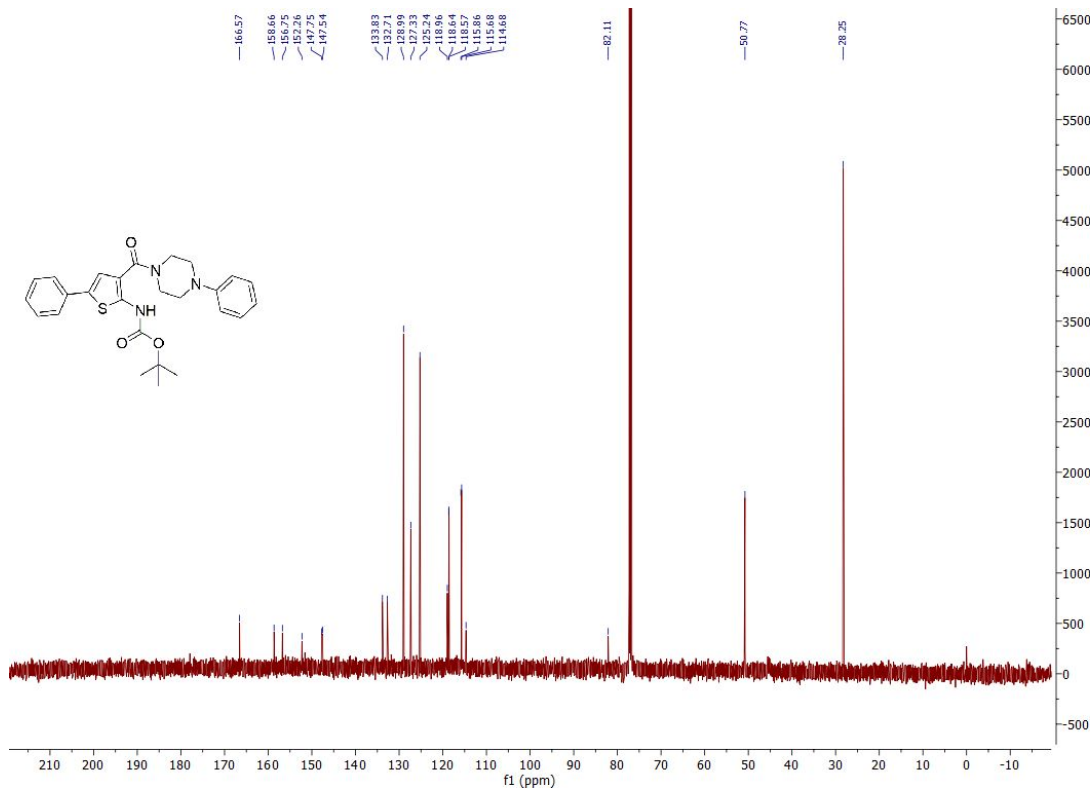

1496

1497  $^1\text{H}$  NMR spectrum of **BDA-11** (500 MHz,  $\text{CDCl}_3$ )

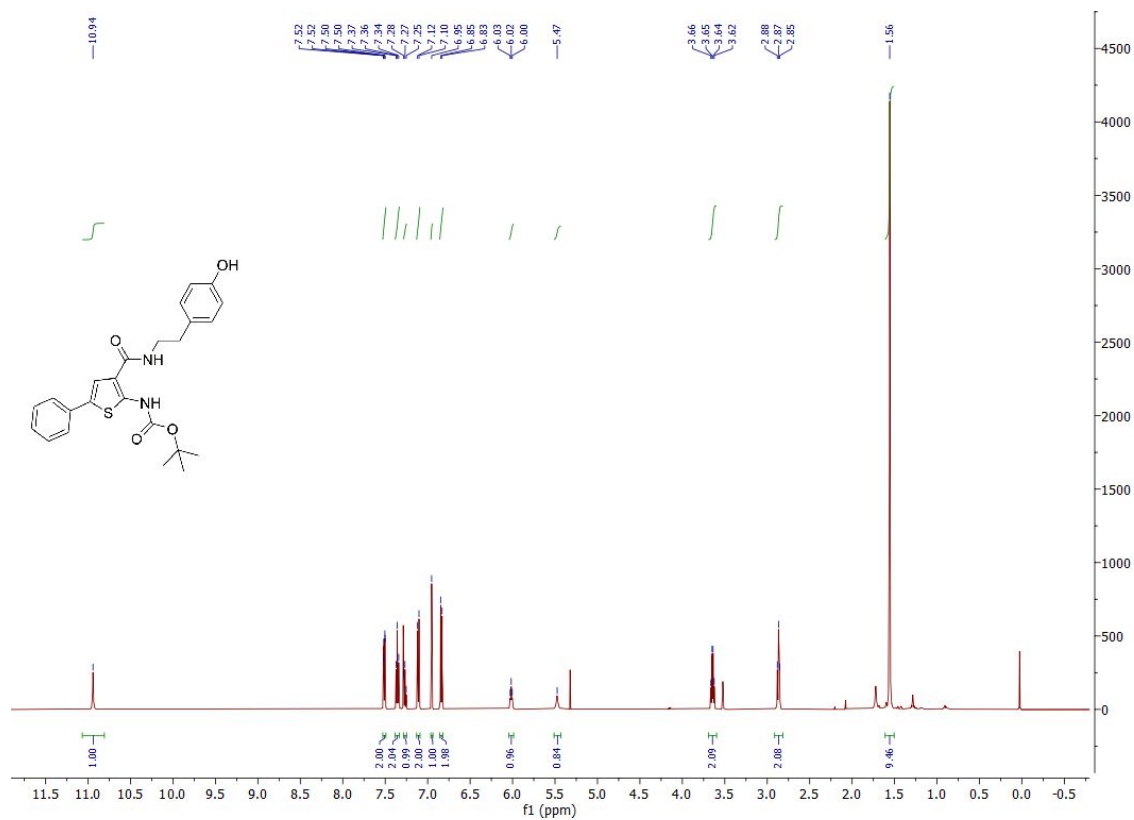

1498

1499  $^{13}\text{C}\{^1\text{H}\}$  NMR spectrum of **BDA-11** (126 MHz,  $\text{CDCl}_3$ )

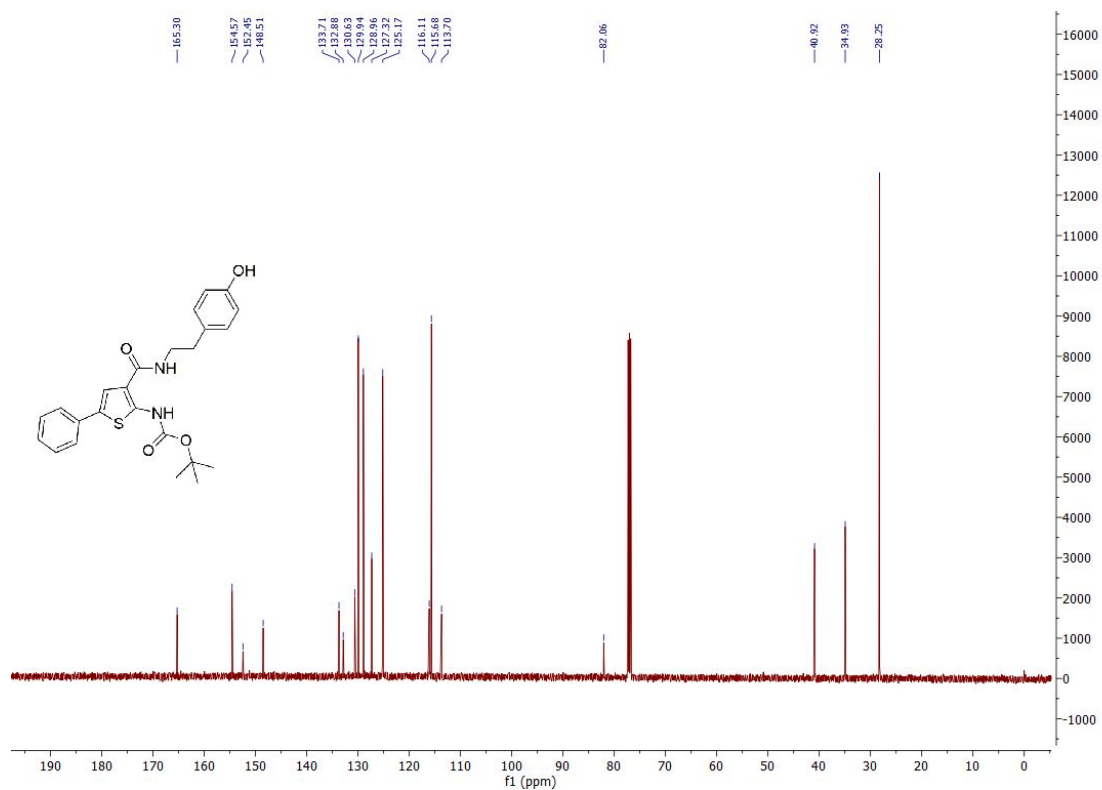

1500

1501  $^1\text{H}$  NMR spectrum of **BDA-12** (500 MHz,  $\text{CDCl}_3$ )

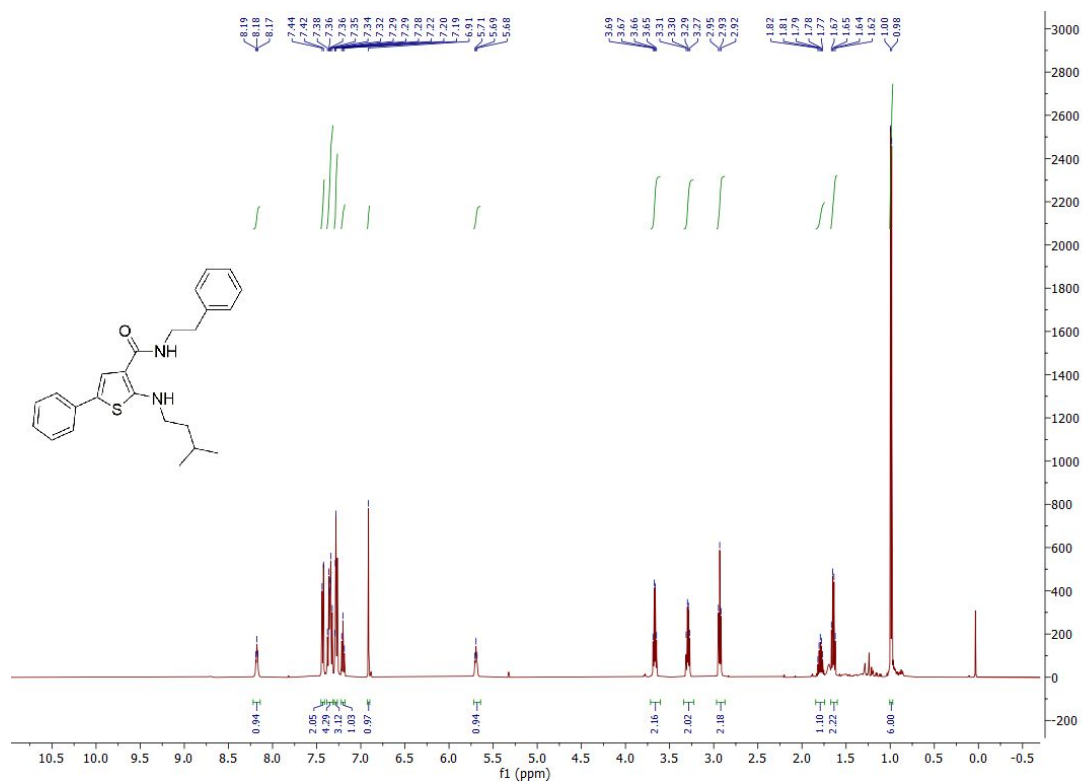

1502

1503  $^{13}\text{C}\{^1\text{H}\}$  NMR spectrum of **BDA-12** (126 MHz,  $\text{CDCl}_3$ )

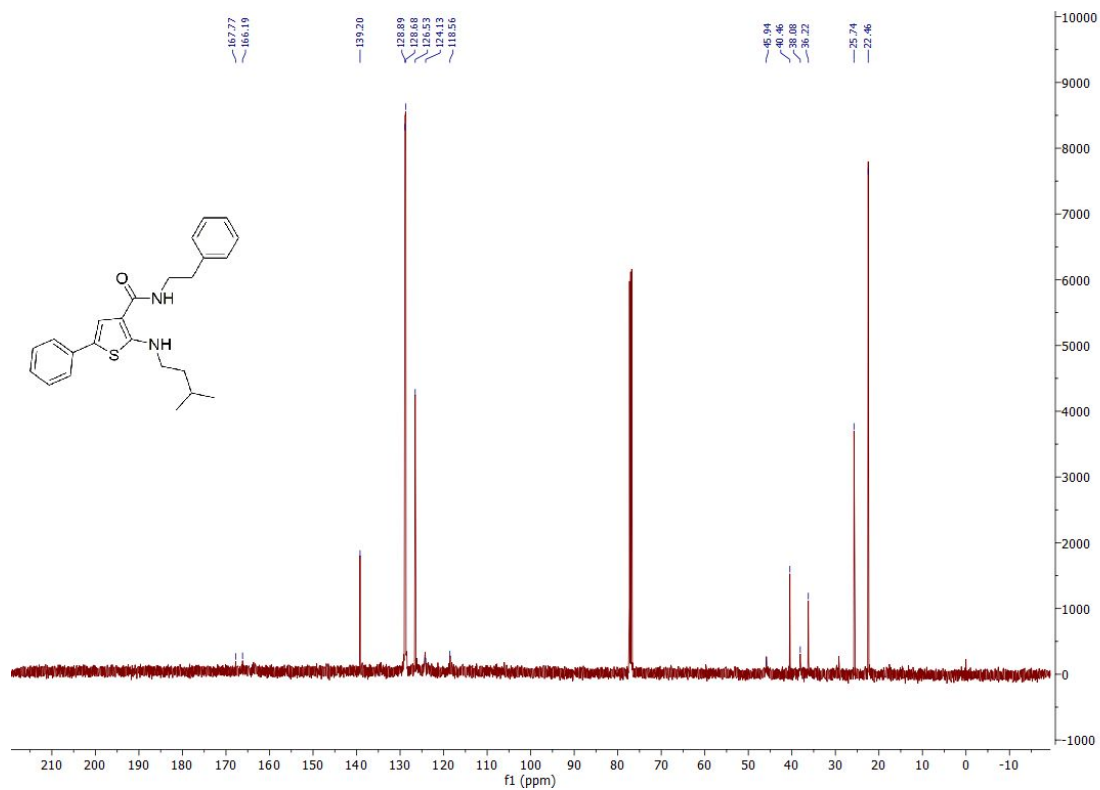

1504

1505  $^1\text{H}$  NMR spectrum of **BDA-13** (500 MHz,  $\text{CDCl}_3$ )

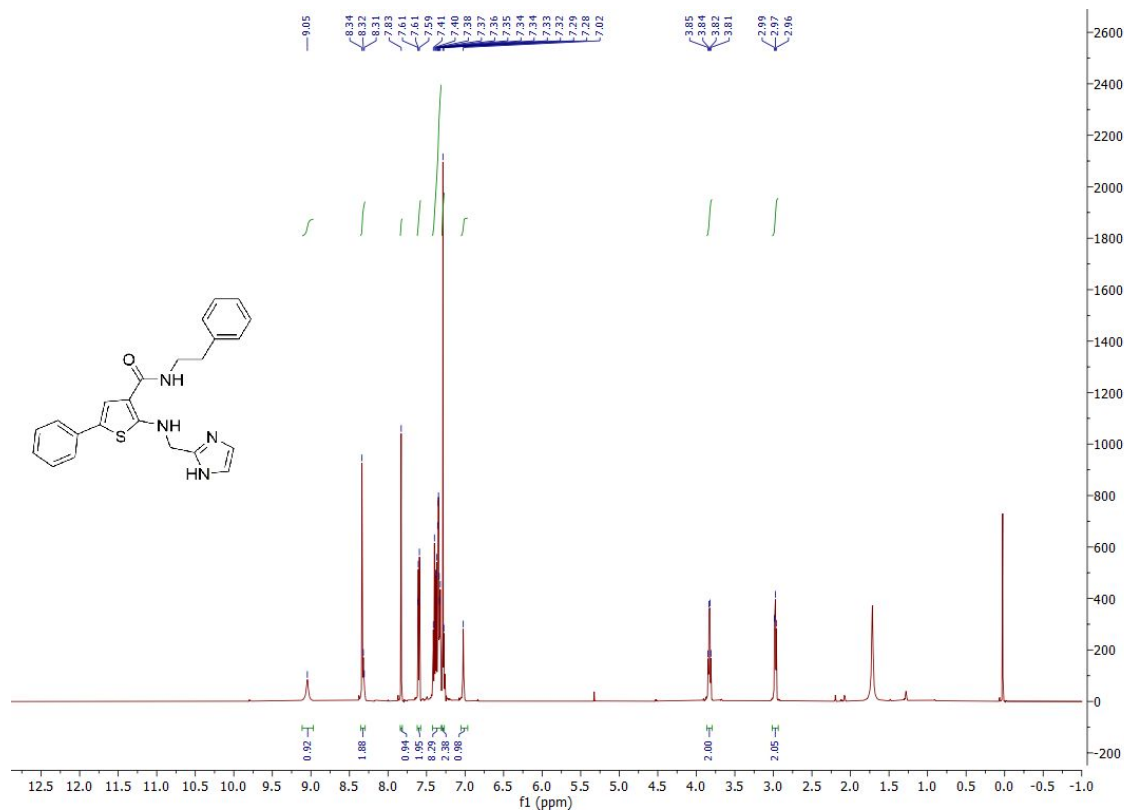

1506

1507  $^{13}\text{C}\{^1\text{H}\}$  NMR spectrum of **BDA-13** (126 MHz,  $\text{CDCl}_3$ )

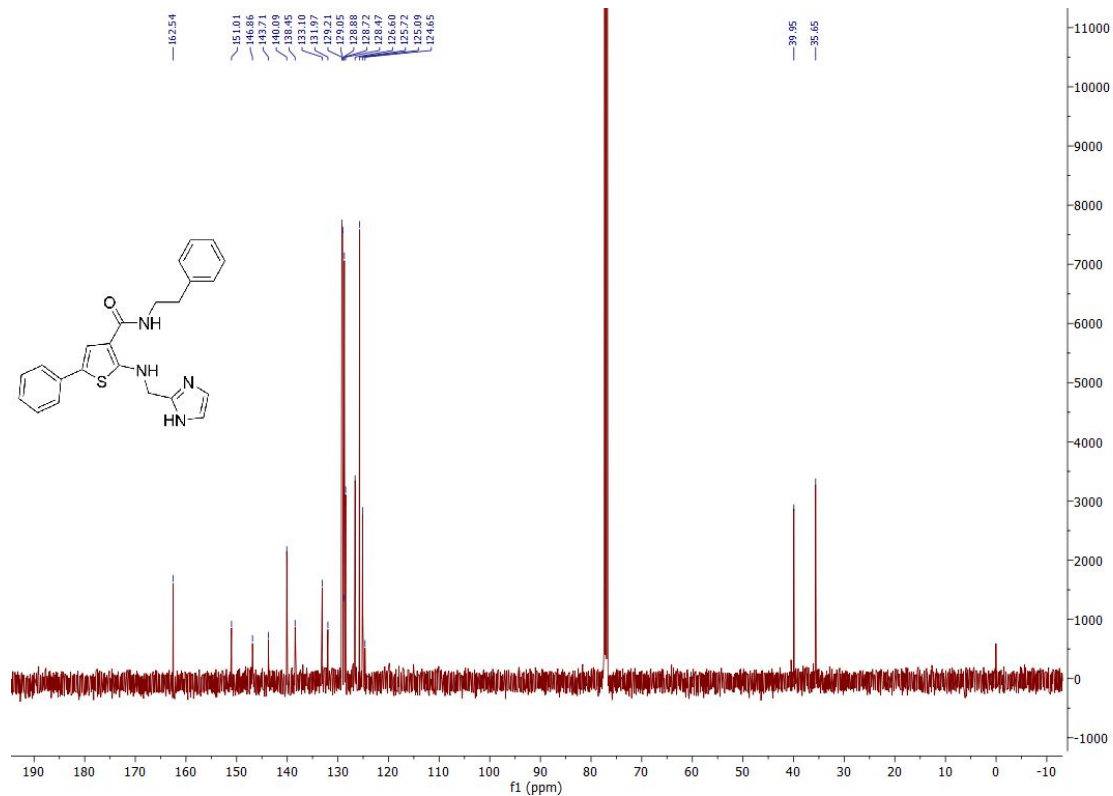

1508

1509  $^1\text{H}$  NMR spectrum of **BDA-14** (500 MHz,  $\text{CDCl}_3$ )

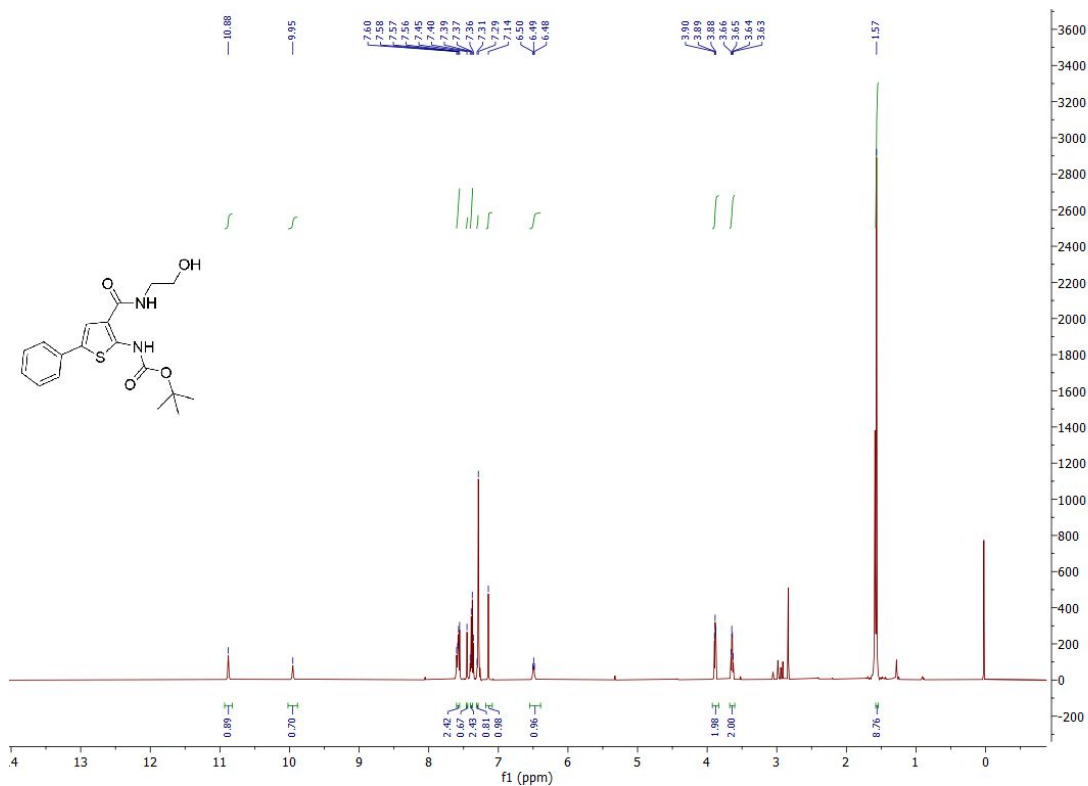

1510

1511  $^{13}\text{C}\{^1\text{H}\}$  NMR spectrum of **BDA-14** (126 MHz,  $\text{CDCl}_3$ )

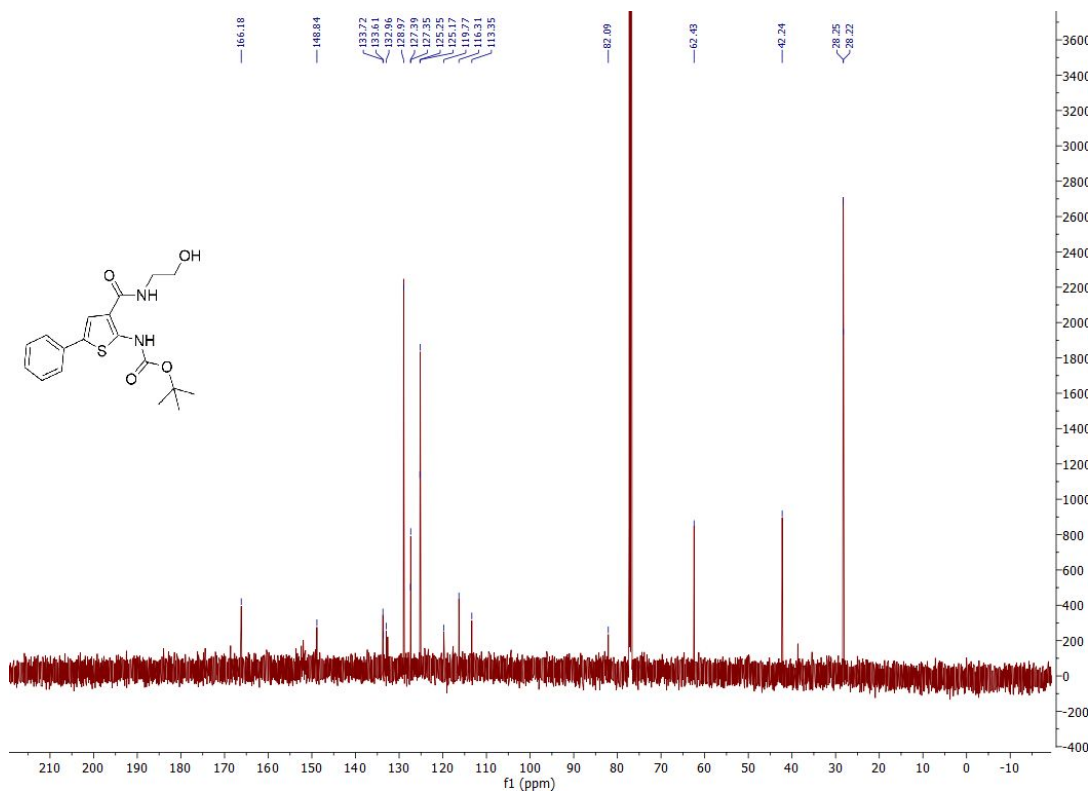

1512

1513  $^1\text{H}$  NMR spectrum of **BDA-15** (500 MHz,  $\text{CDCl}_3$ )

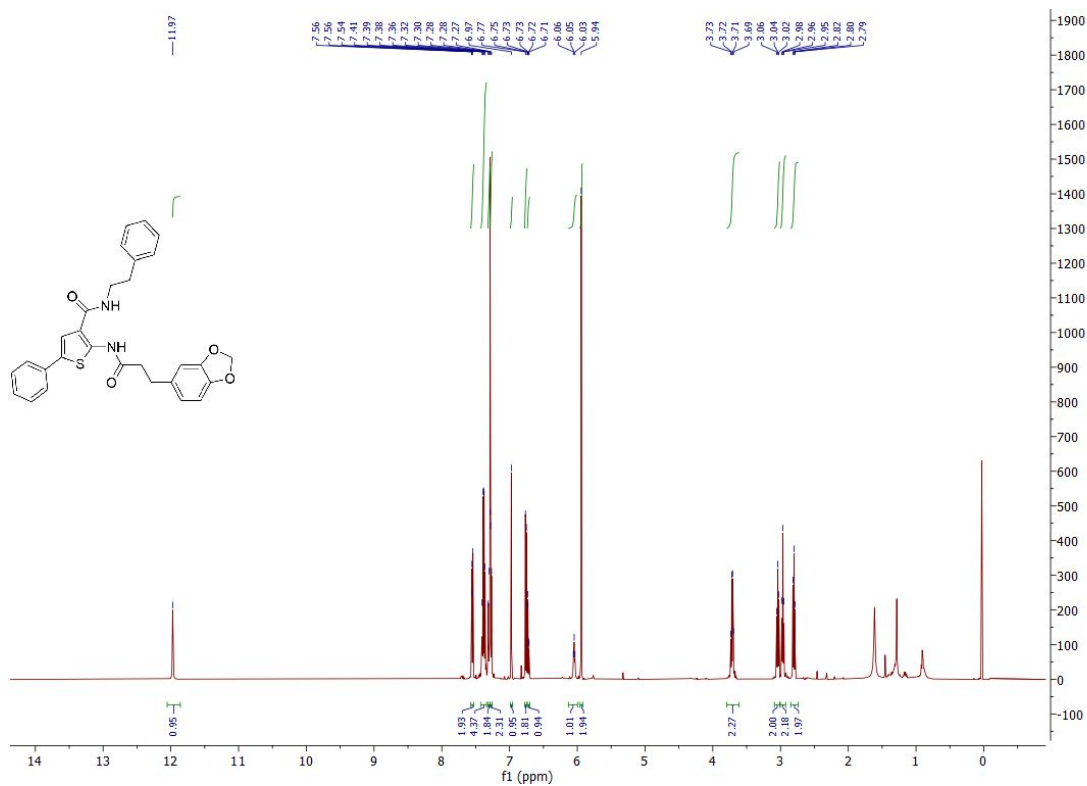

1514

1515  $^{13}\text{C}\{^1\text{H}\}$  NMR spectrum of **BDA-15** (126 MHz,  $\text{CDCl}_3$ )

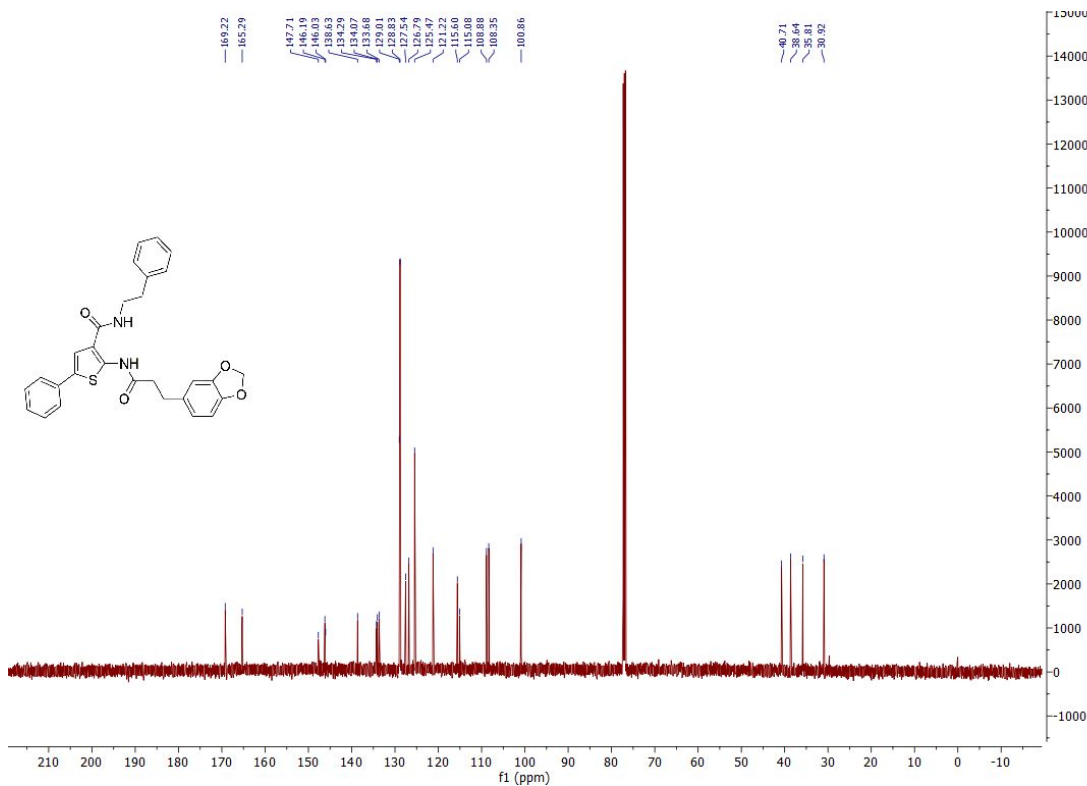

1516

1517  $^1\text{H}$  NMR spectrum of **BDA-16** (500 MHz,  $\text{DMSO-d}_6$ )

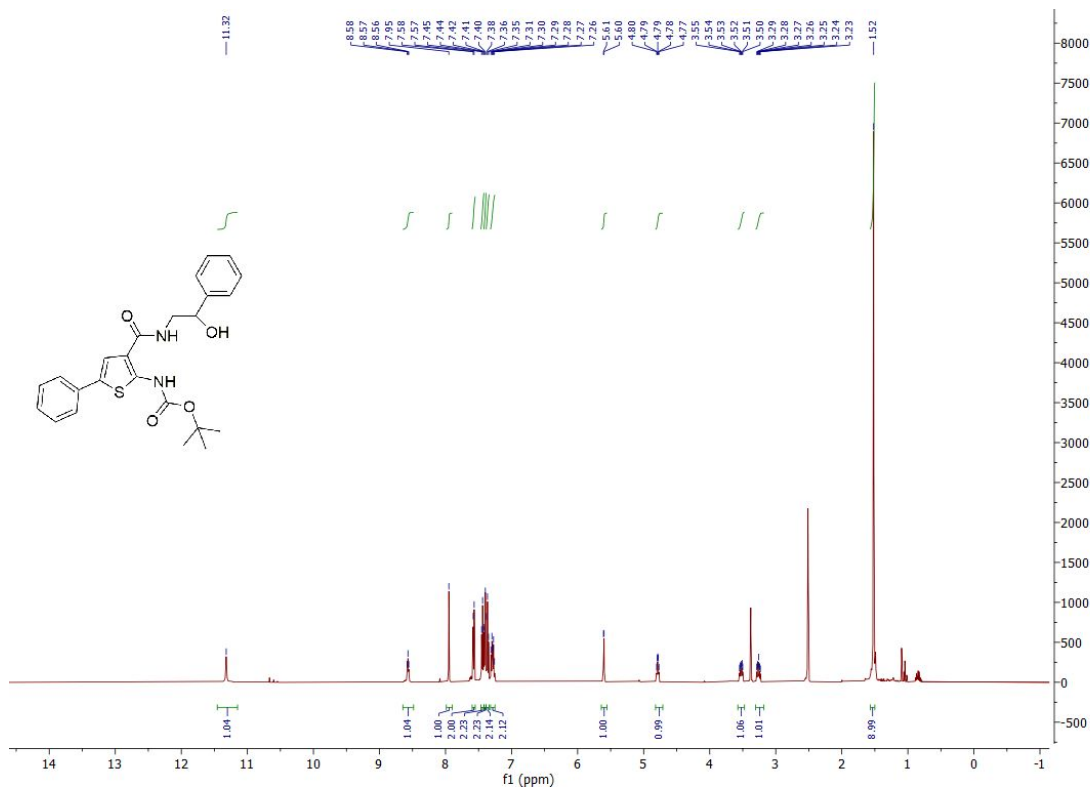

1518

1519  $^{13}\text{C}\{^1\text{H}\}$  NMR spectrum of **BDA-16** (126 MHz,  $\text{DMSO-d}_6$ )

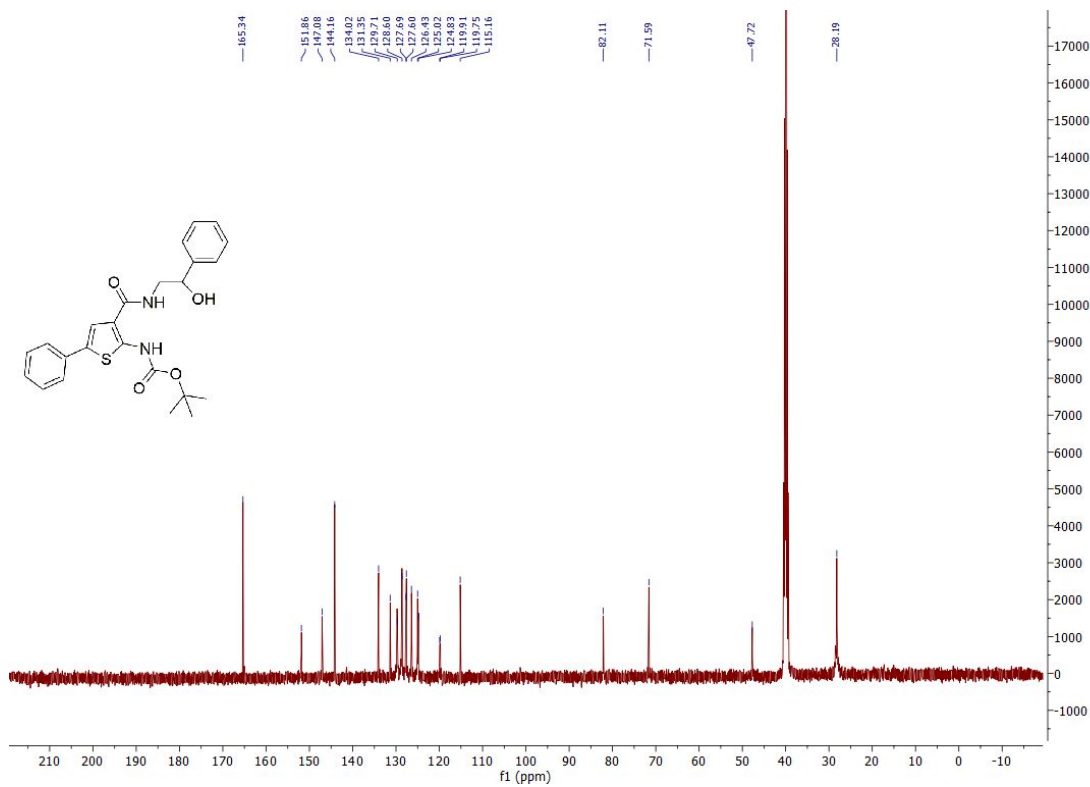

1520



1521  $^1\text{H}$  NMR spectrum of **BDA-17** (500 MHz,  $\text{CDCl}_3$ )

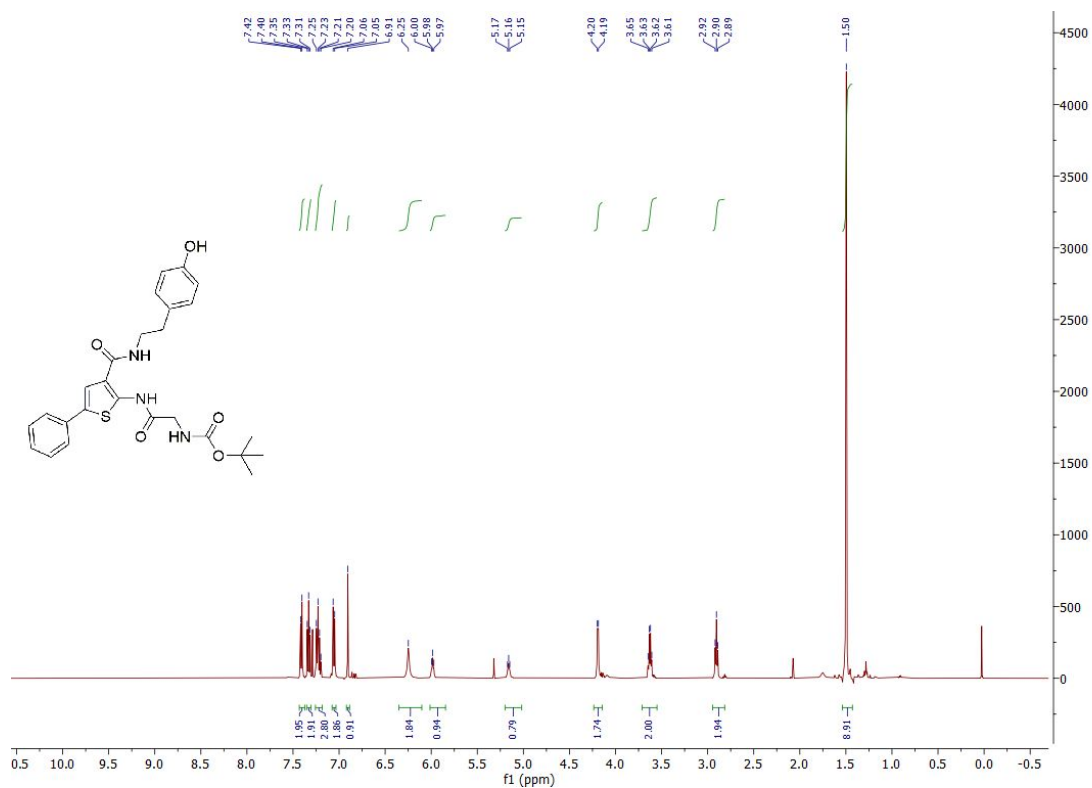

1522

1523  $^{13}\text{C}\{^1\text{H}\}$  NMR spectrum of **BDA-17** (126 MHz,  $\text{CDCl}_3$ )

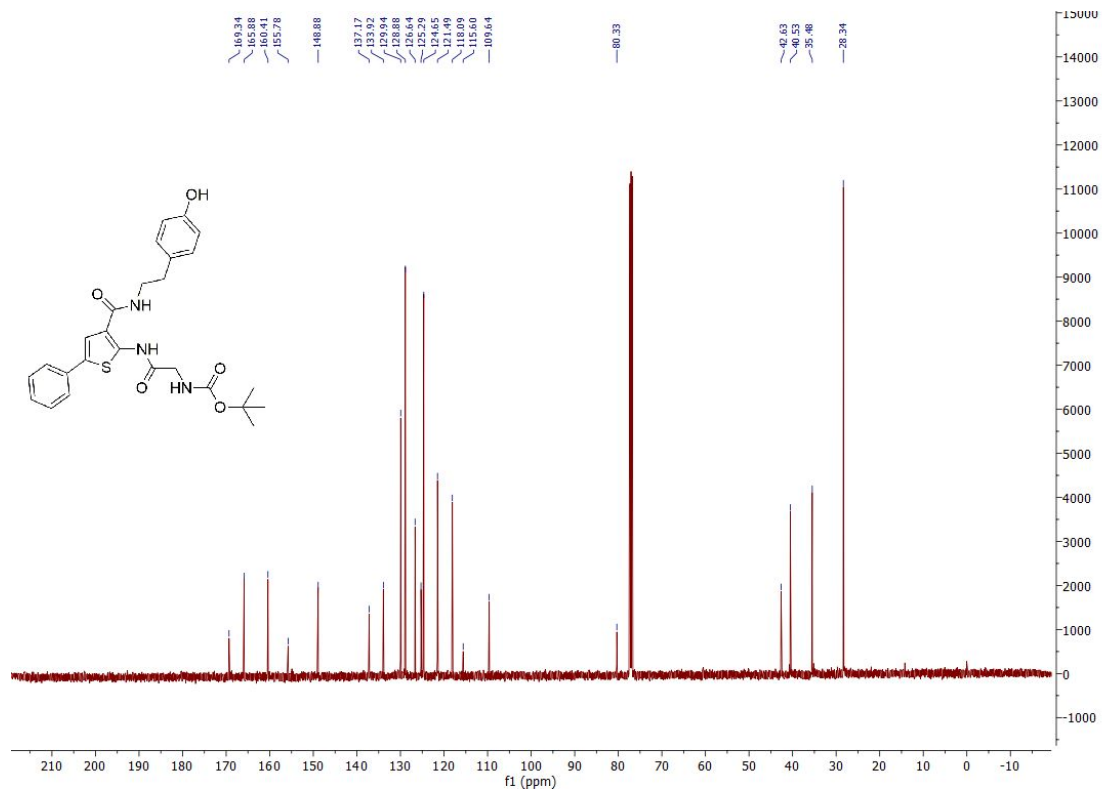

1524

1525  $^1\text{H}$  NMR spectrum of **BDA-18** (500 MHz,  $\text{CDCl}_3$ )

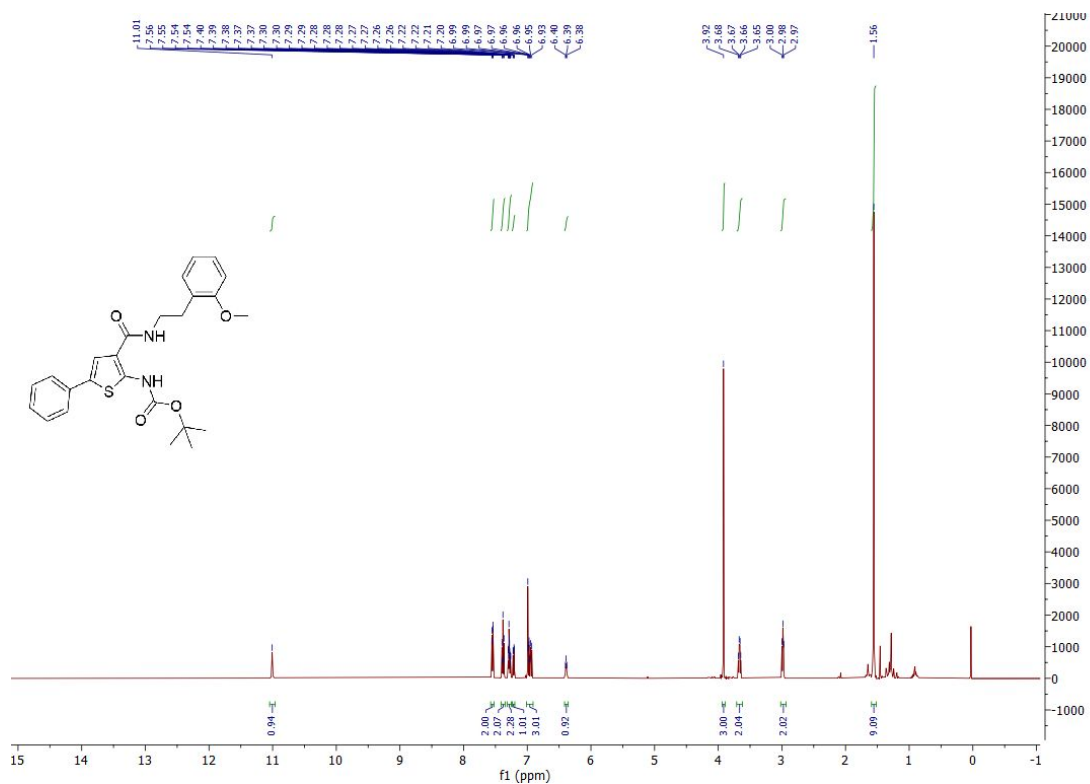

1526

1527  $^{13}\text{C}\{^1\text{H}\}$  NMR spectrum of **BDA-18** (126 MHz,  $\text{CDCl}_3$ )

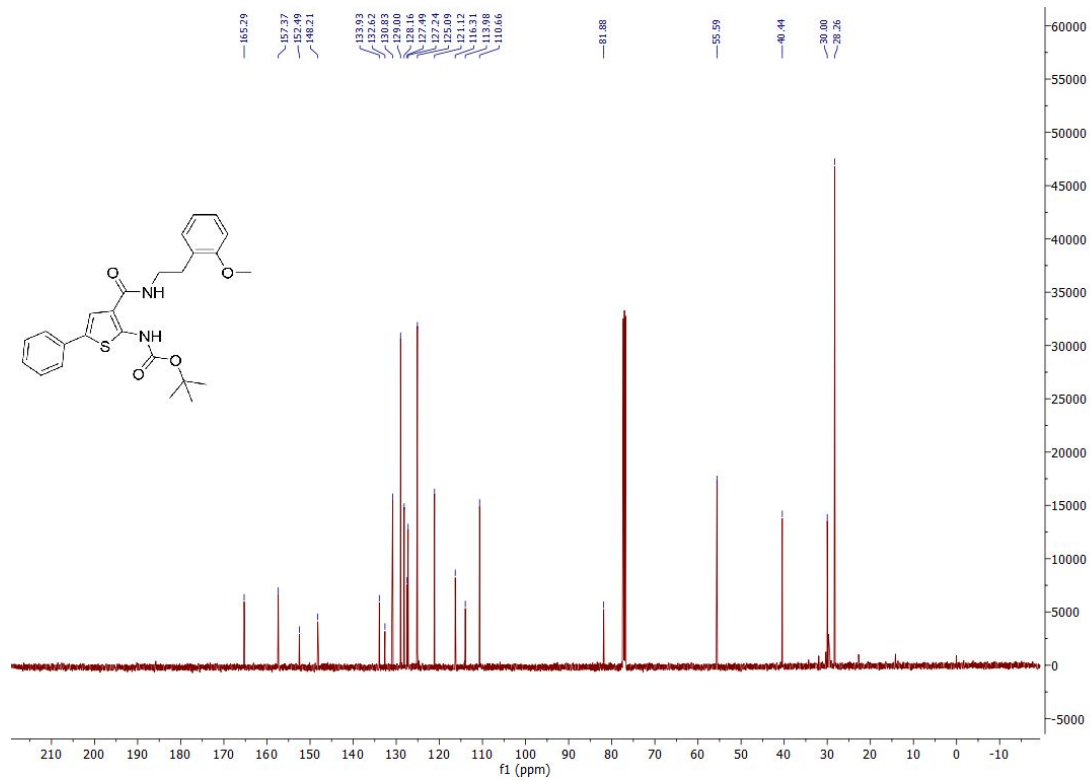

1528

1529  $^1\text{H}$  NMR spectrum of **BDA-19** (500 MHz,  $\text{CDCl}_3$ )

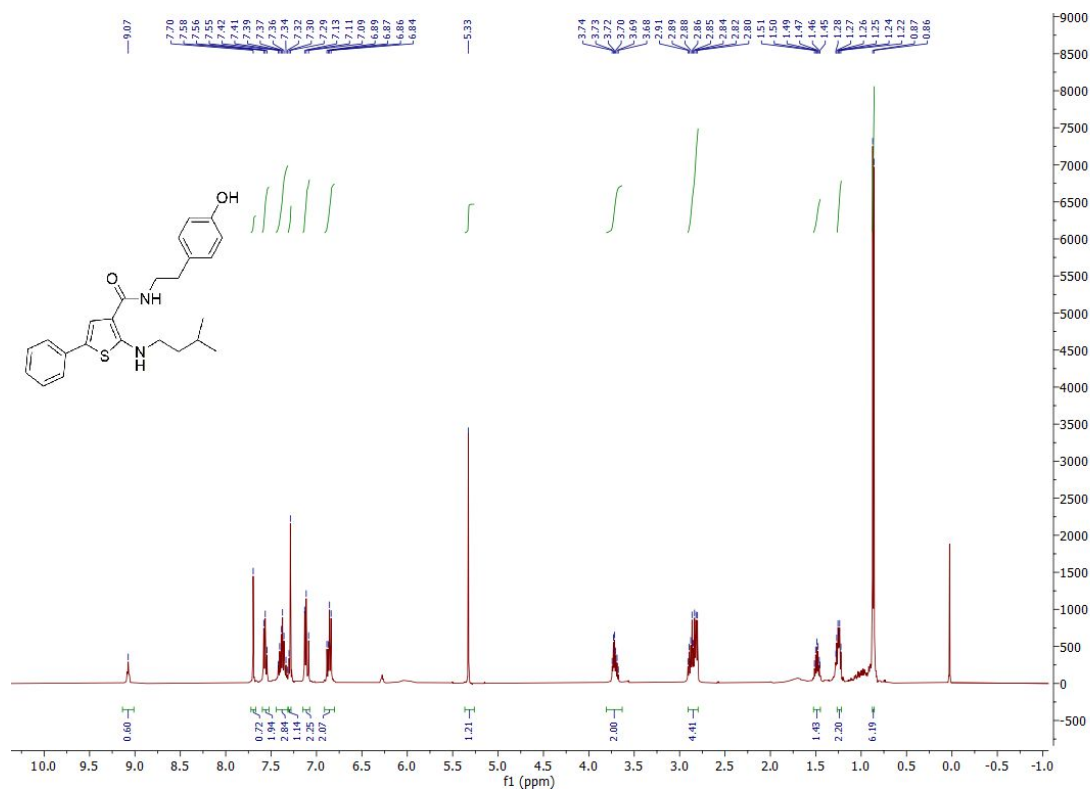

1530

1531  $^{13}\text{C}\{^1\text{H}\}$  NMR spectrum of **BDA-19** (126 MHz,  $\text{CDCl}_3$ )

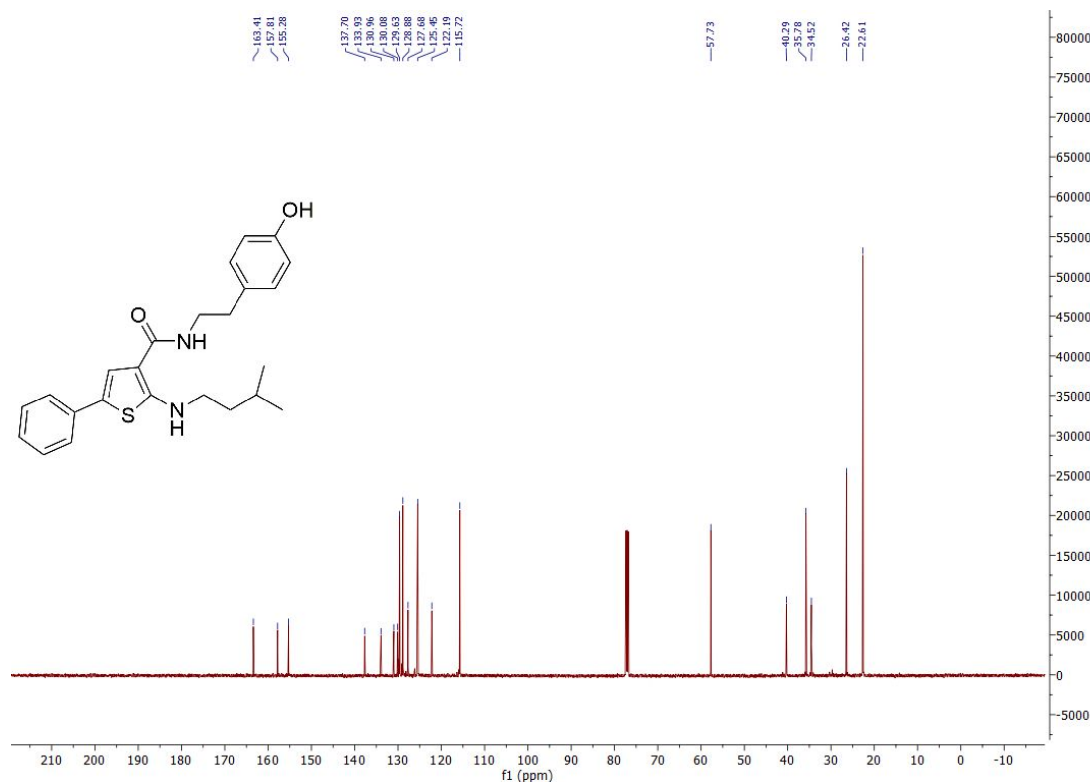

1532

1533  $^1\text{H}$  NMR spectrum of **BDA-20** (500 MHz,  $\text{CDCl}_3$ )

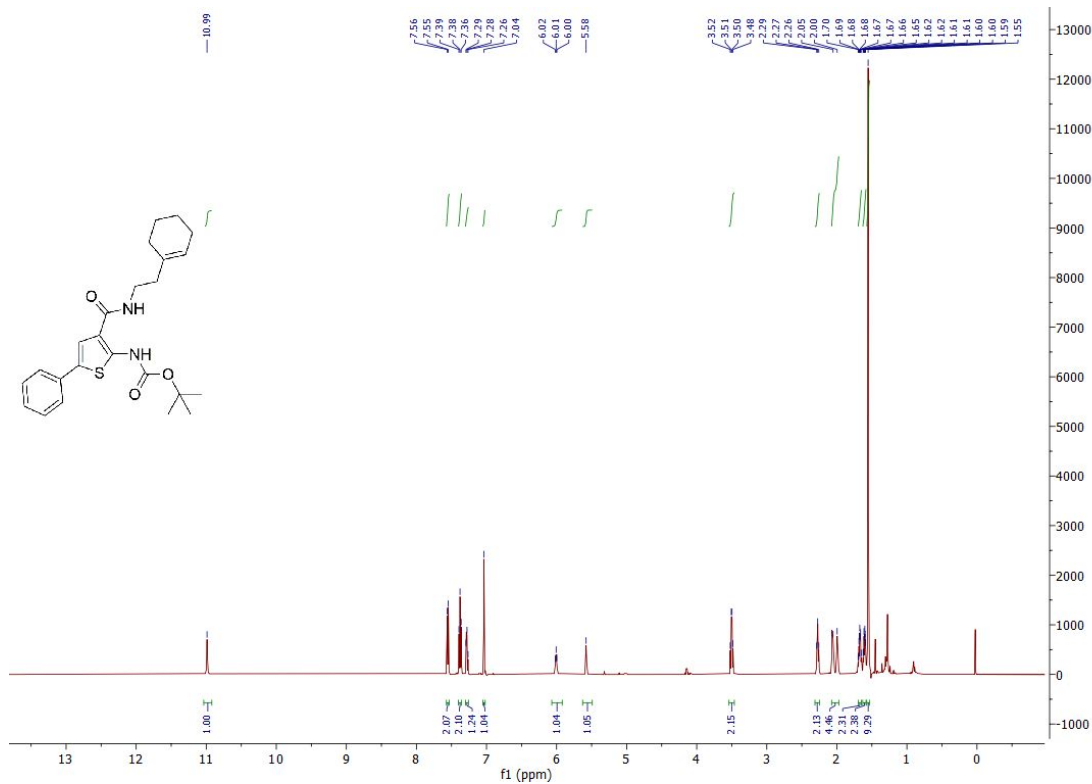

1534

1535  $^{13}\text{C}\{^1\text{H}\}$  NMR spectrum of **BDA-20** (126 MHz,  $\text{CDCl}_3$ )

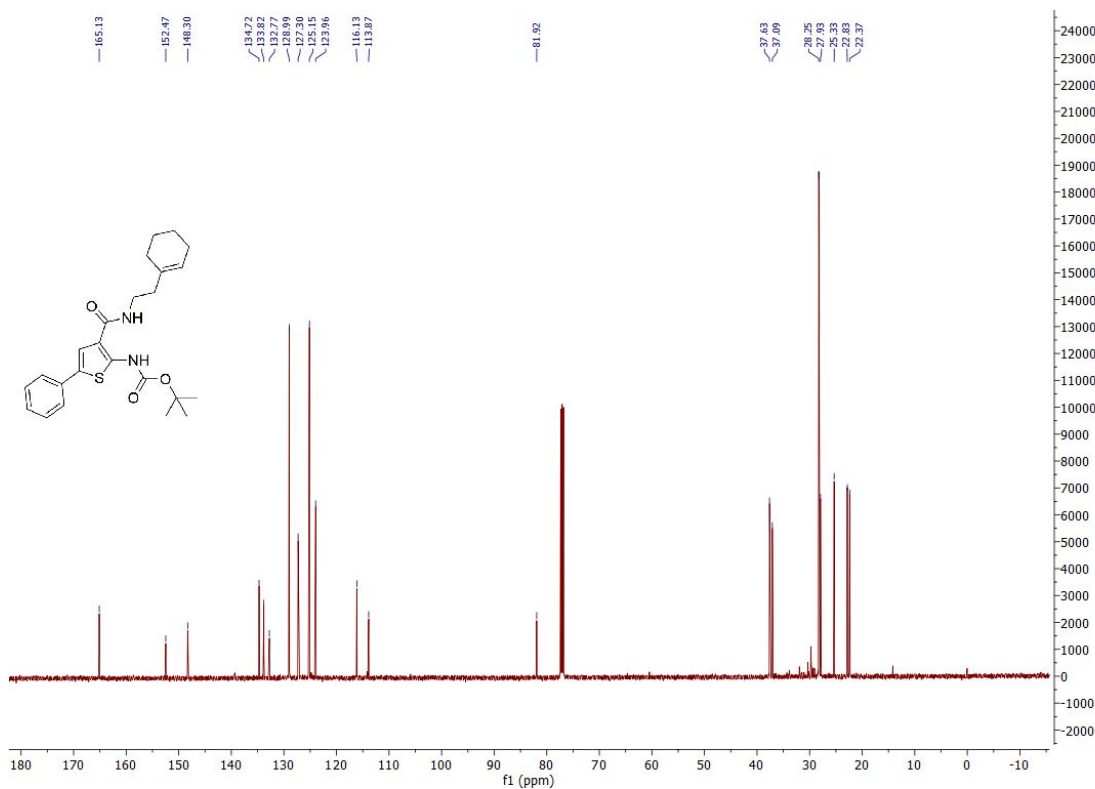

1536

1537  $^1\text{H}$  NMR spectrum of **BDA-21** (500 MHz,  $\text{CDCl}_3$ )

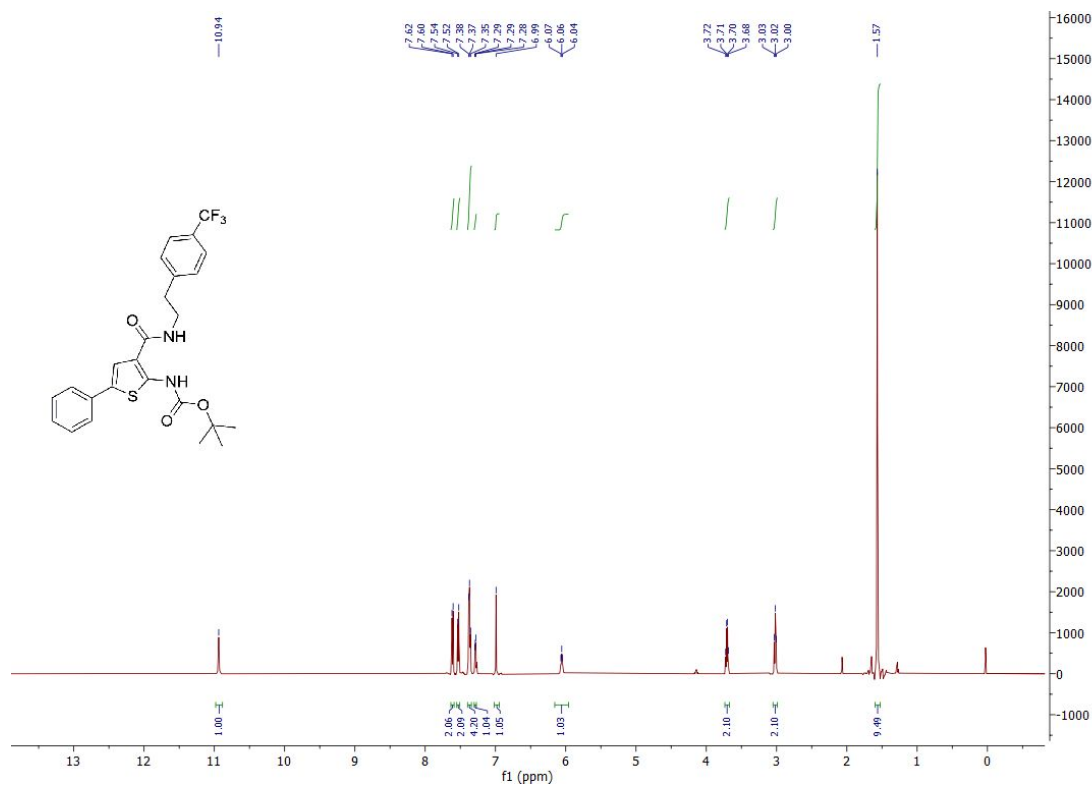

1538

1539  $^{13}\text{C}\{^1\text{H}\}$  NMR spectrum of **BDA-21** (126 MHz,  $\text{CDCl}_3$ )

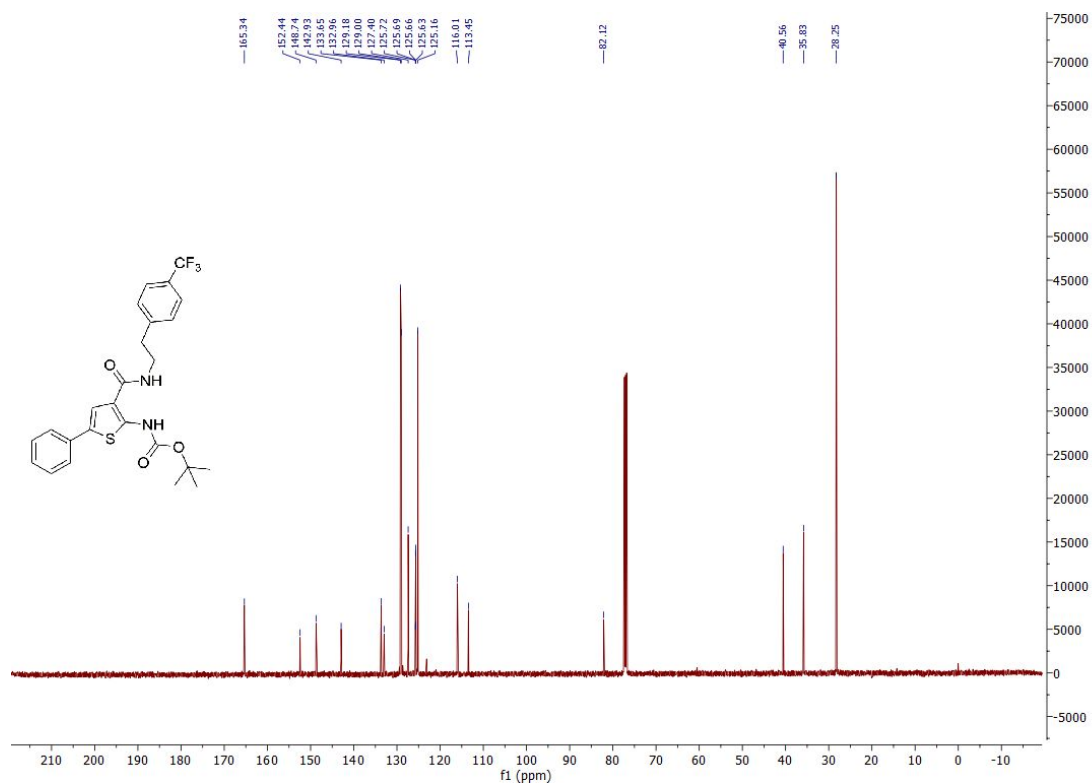

1540

1541  $^1\text{H}$  NMR spectrum of **BDA-22** (500 MHz,  $\text{CDCl}_3$ )

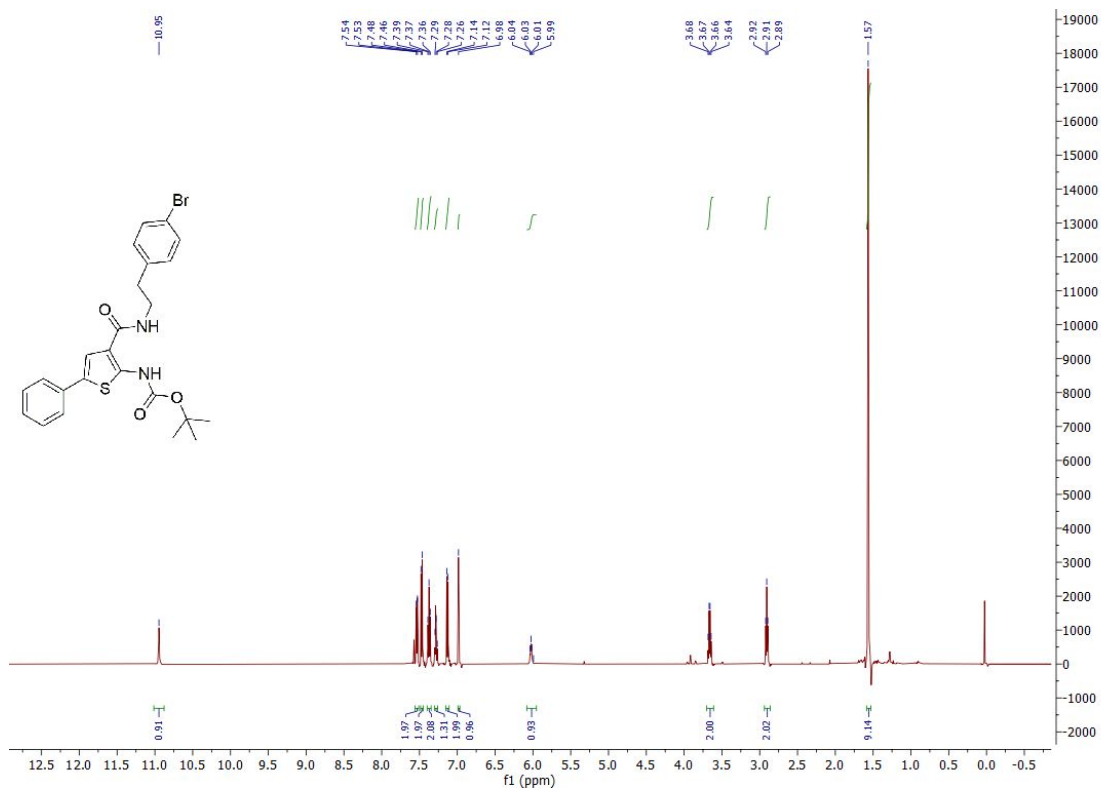

1542

1543  $^{13}\text{C}\{^1\text{H}\}$  NMR spectrum of **BDA-22** (126 MHz,  $\text{CDCl}_3$ )

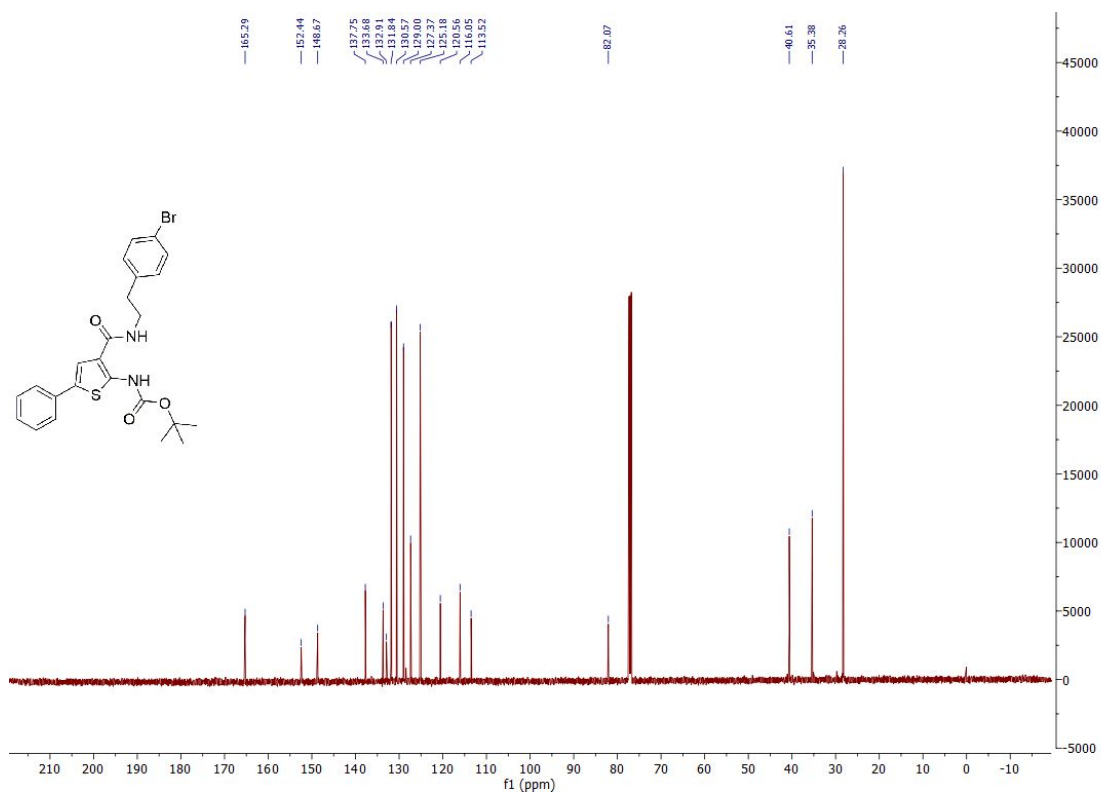

1544

1545  $^1\text{H}$  NMR spectrum of **BDA-23** (500 MHz,  $\text{CDCl}_3$ )

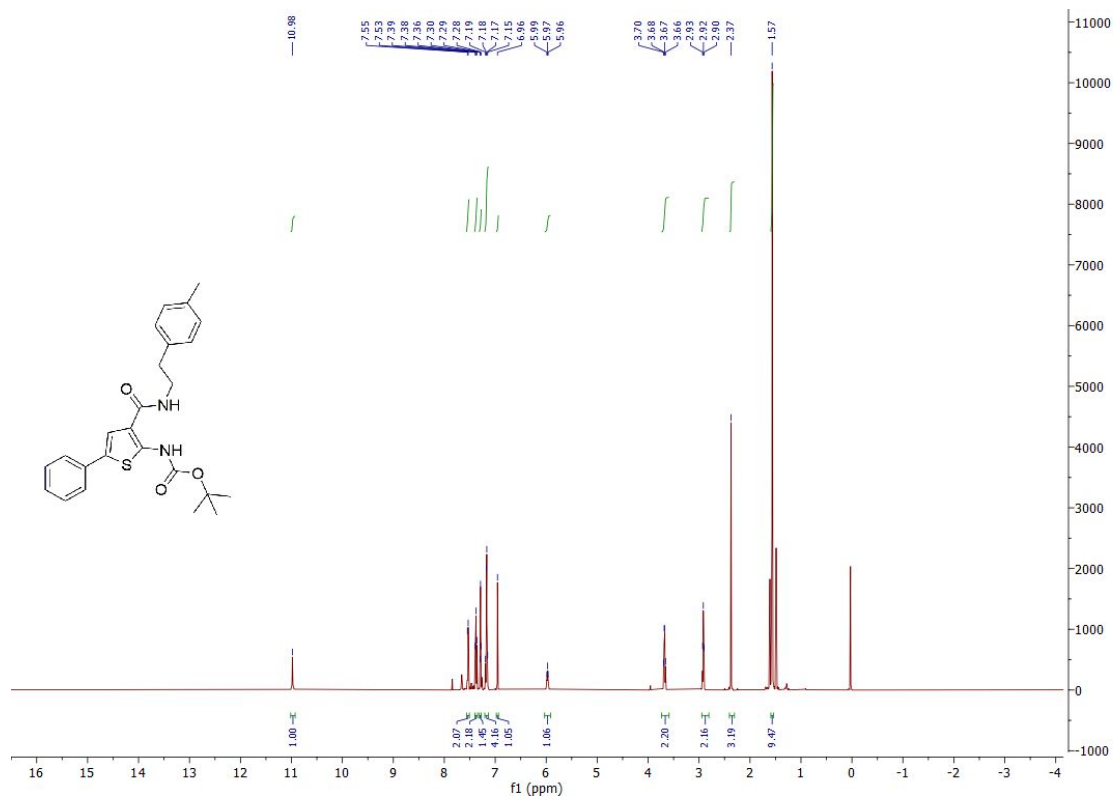

1546

1547  $^{13}\text{C}\{^1\text{H}\}$  NMR spectrum of **BDA-23** (126 MHz,  $\text{CDCl}_3$ )

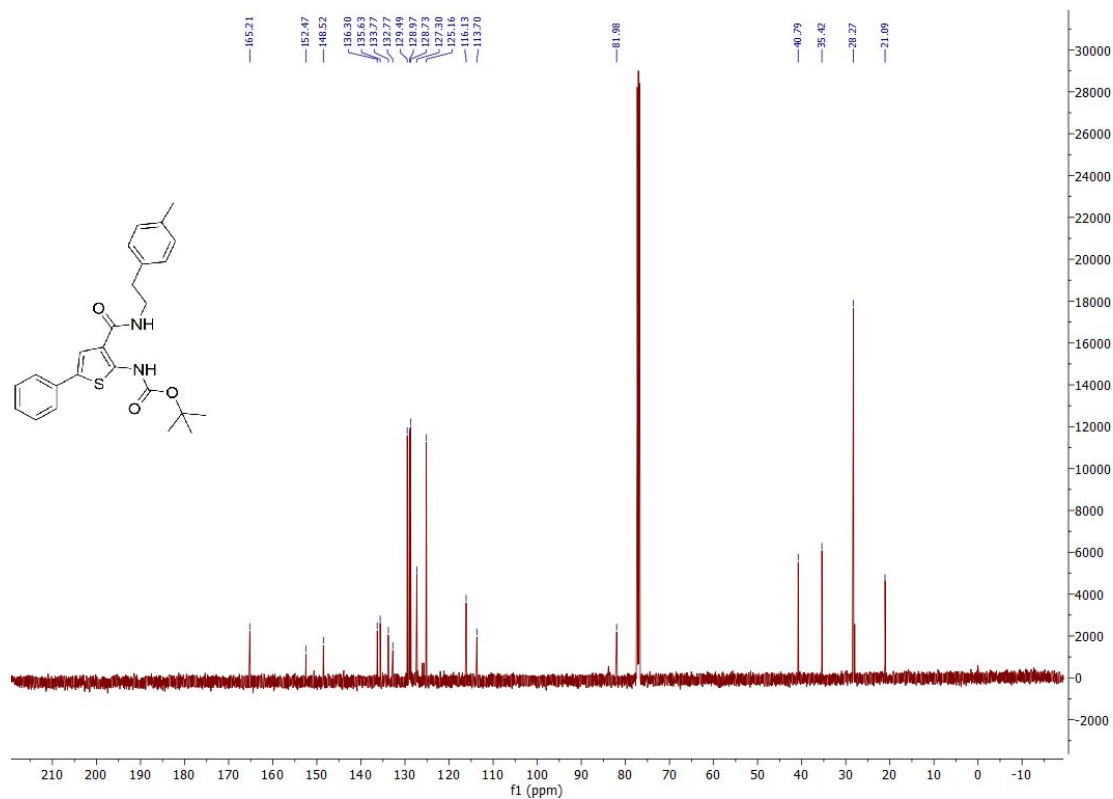

1548

1549  $^1\text{H}$  NMR spectrum of **BDA-24** (500 MHz,  $\text{CDCl}_3$ )

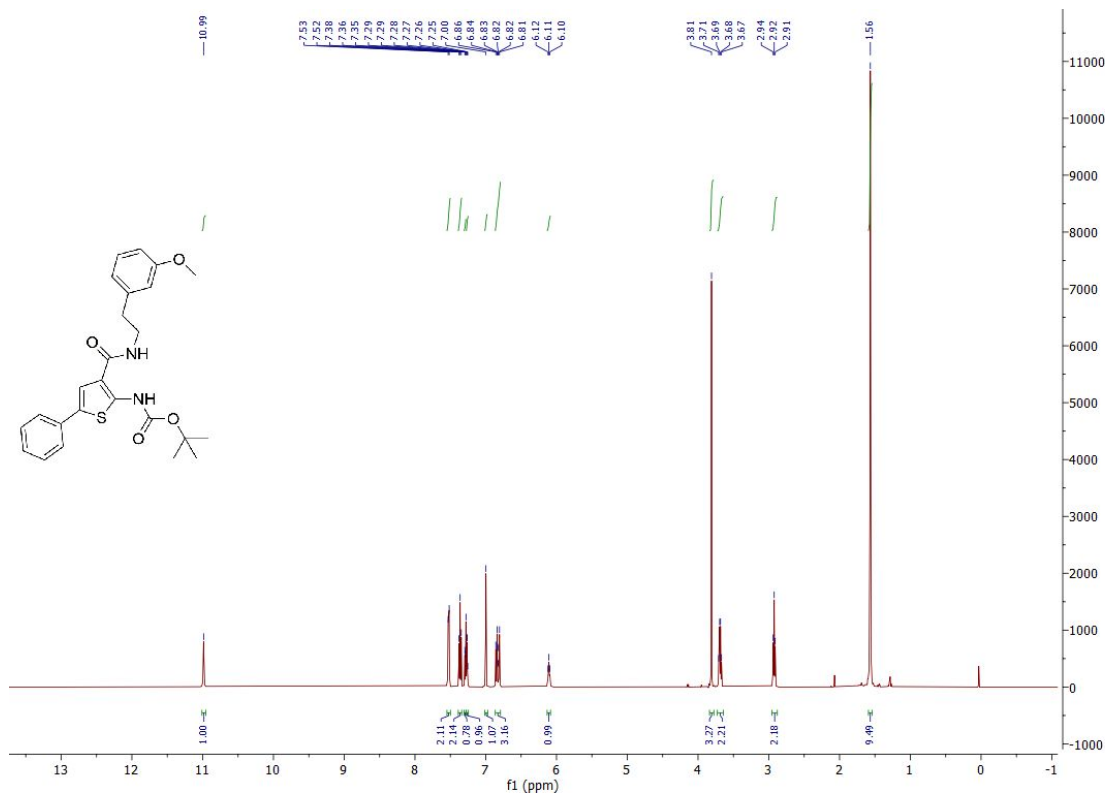

1550

1551  $^{13}\text{C}\{^1\text{H}\}$  NMR spectrum of **BDA-24** (126 MHz,  $\text{CDCl}_3$ )

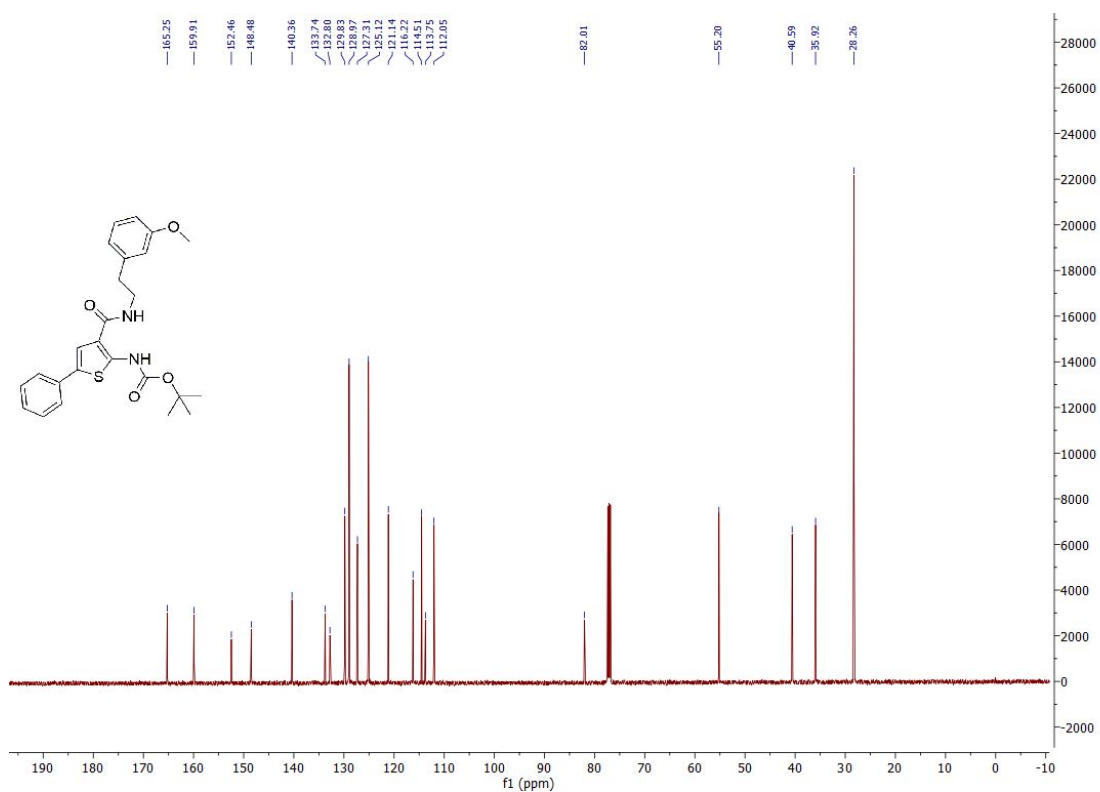

1552



1553  $^1\text{H}$  NMR spectrum of **BDA-25** (500 MHz,  $\text{CDCl}_3$ )

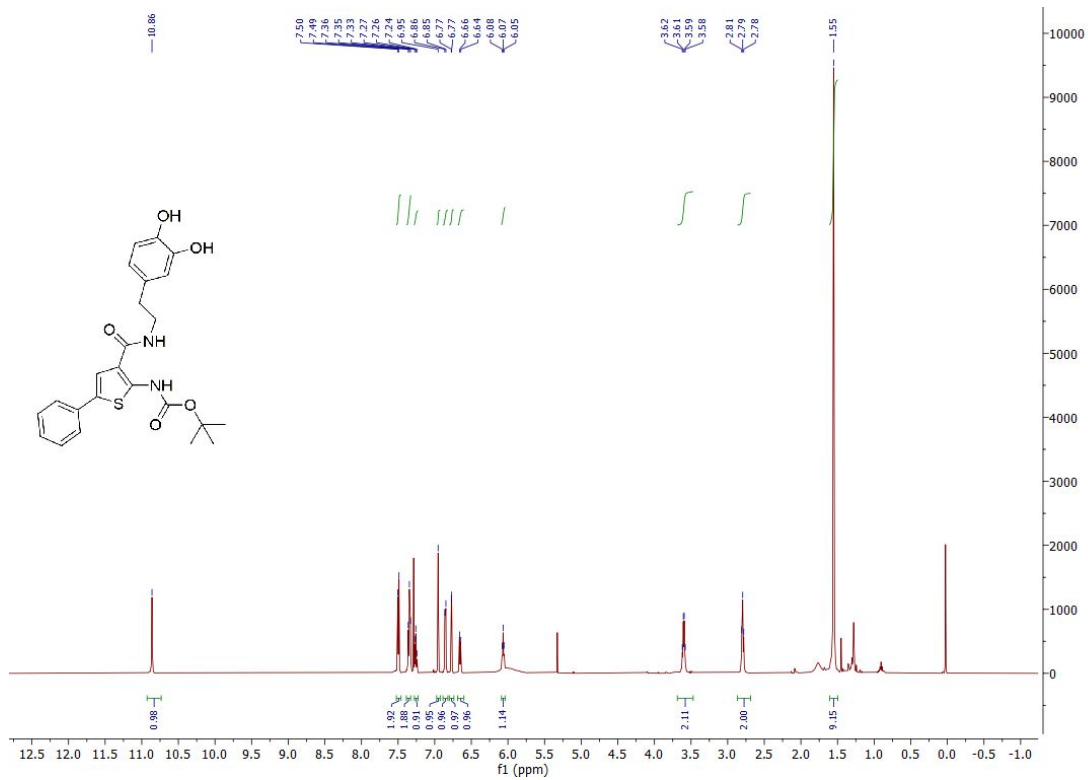

1554

1555  $^{13}\text{C}\{^1\text{H}\}$  NMR spectrum of **BDA-25** (126 MHz,  $\text{CDCl}_3$ )

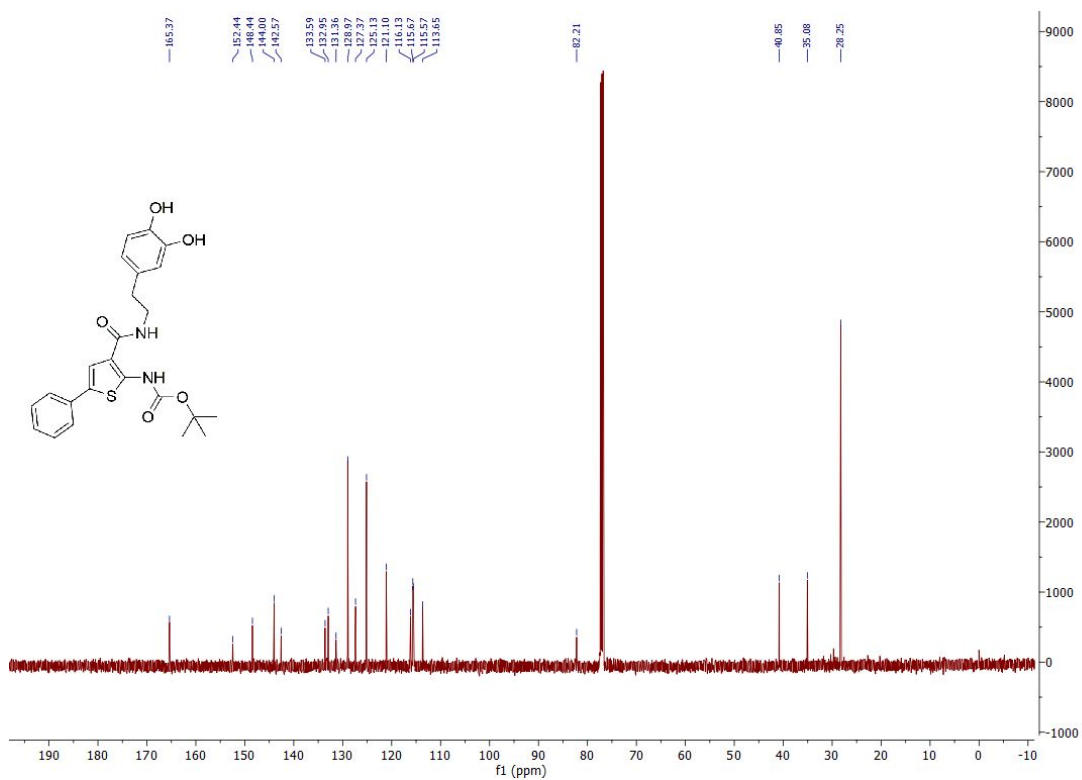

1556

1557  $^1\text{H}$  NMR spectrum of **BDA-26** (500 MHz,  $\text{CDCl}_3$ )

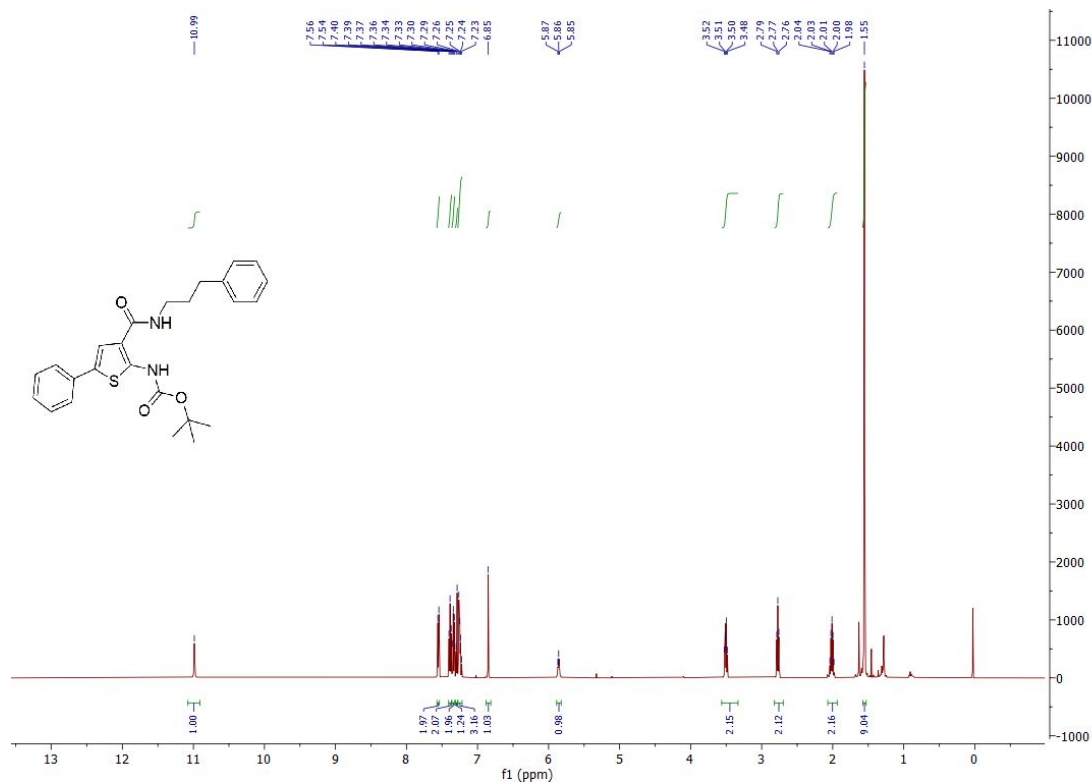

1558

1559  $^{13}\text{C}\{^1\text{H}\}$  NMR spectrum of **BDA-26** (126 MHz,  $\text{CDCl}_3$ )

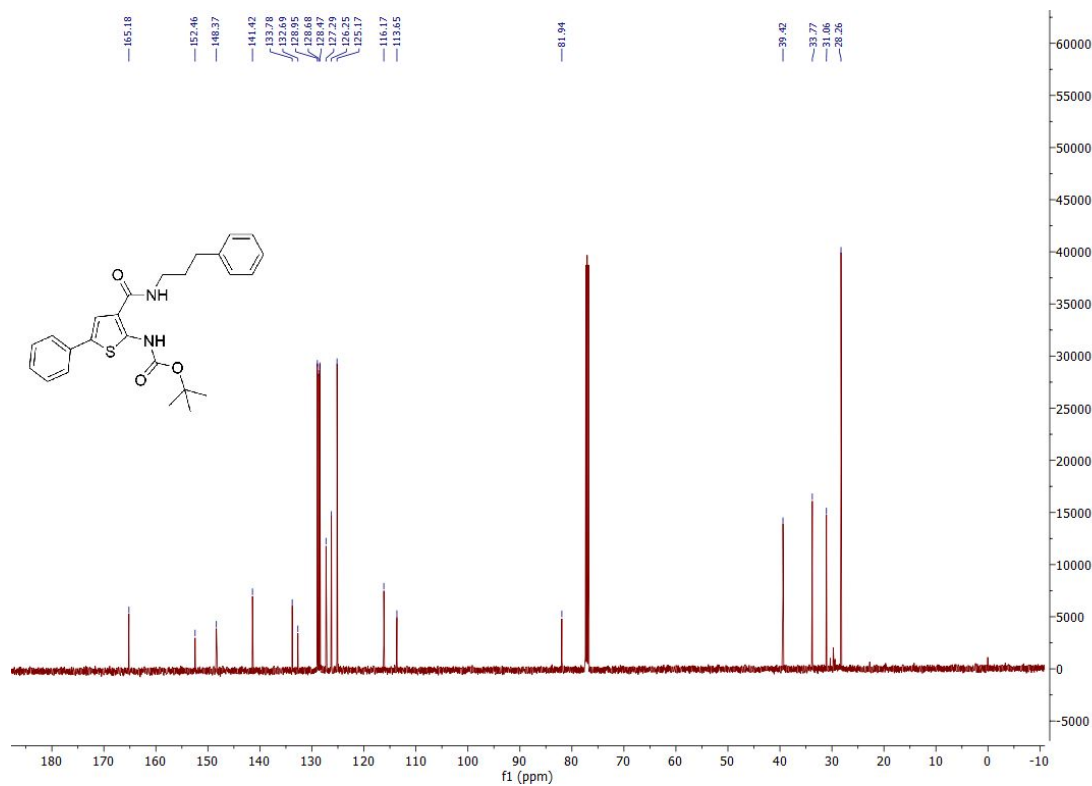

1560

1561  $^1\text{H}$  NMR spectrum of **BDA-27** (500 MHz,  $\text{CDCl}_3$ )

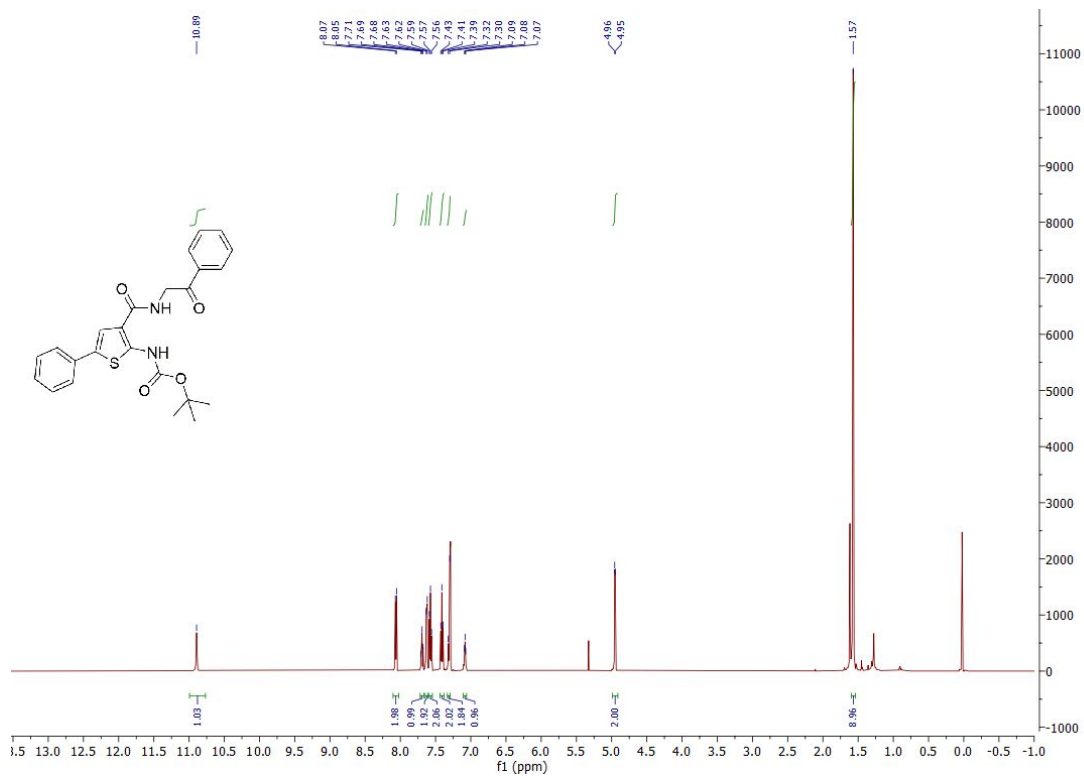

1562

1563  $^{13}\text{C}\{^1\text{H}\}$  NMR spectrum of **BDA-27** (126 MHz,  $\text{CDCl}_3$ )

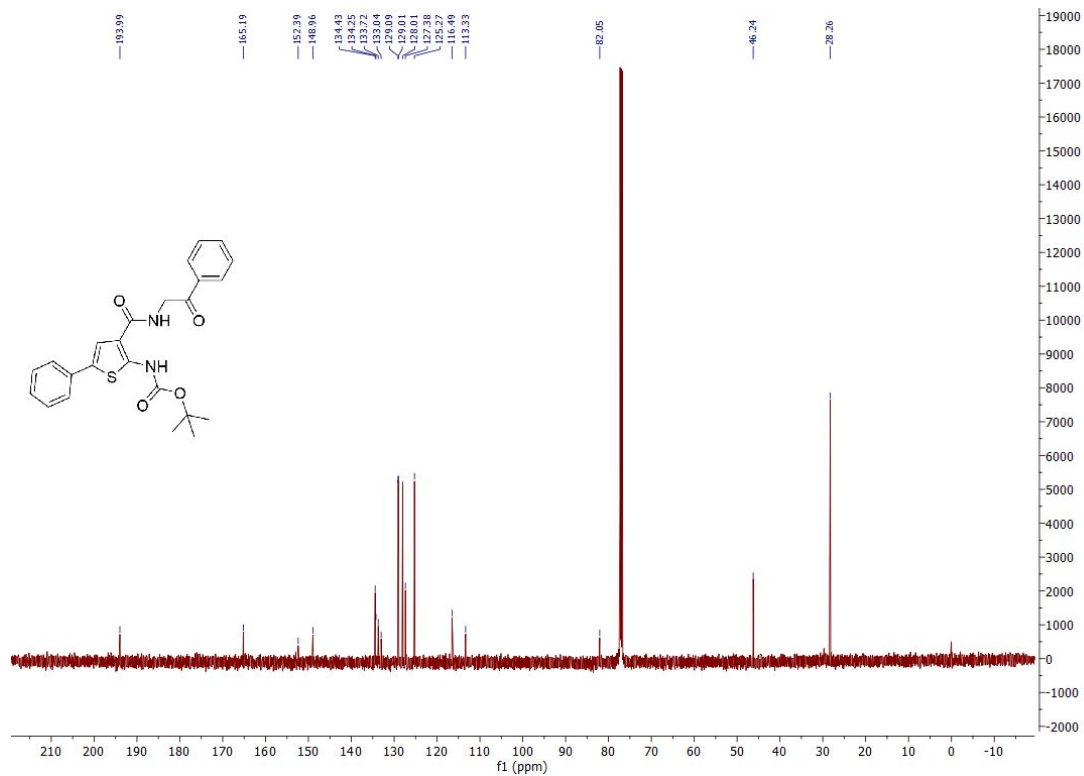

1564

1565

1566  $^1\text{H}$  NMR spectrum of **BDA-28** (500 MHz,  $\text{CDCl}_3$ )

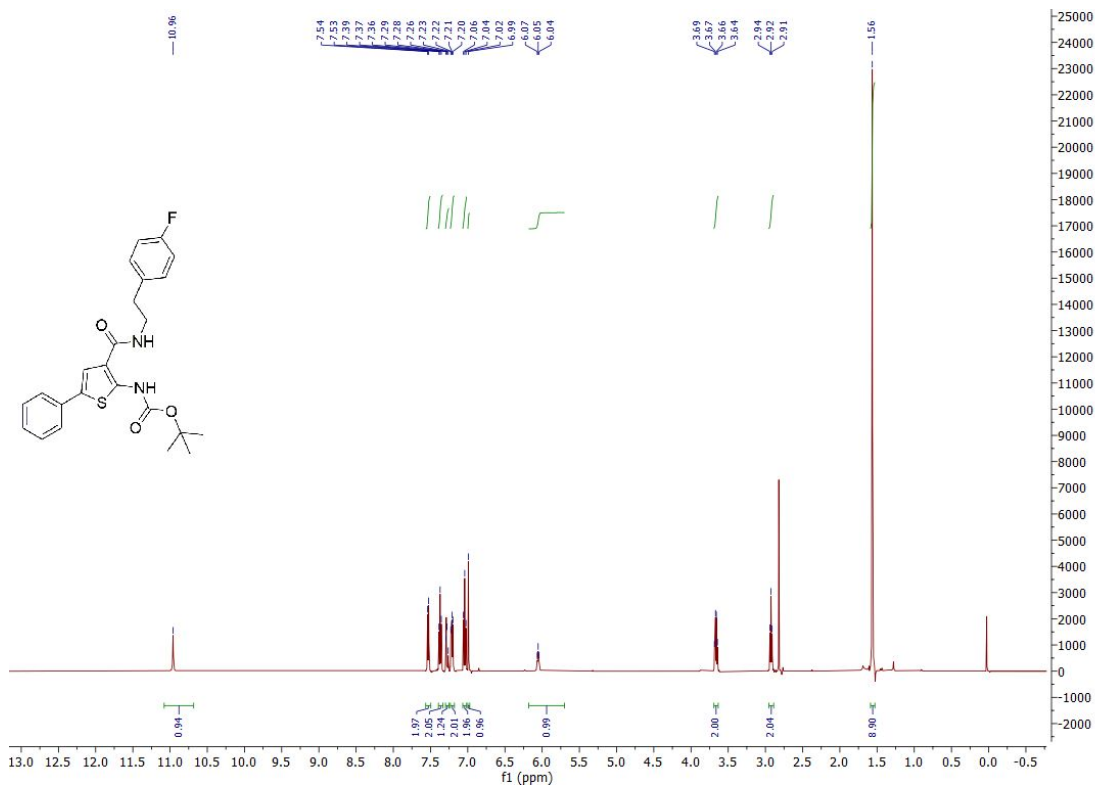

1567

1568  $^{13}\text{C}\{^1\text{H}\}$  NMR spectrum of **BDA-28** (126 MHz,  $\text{CDCl}_3$ )

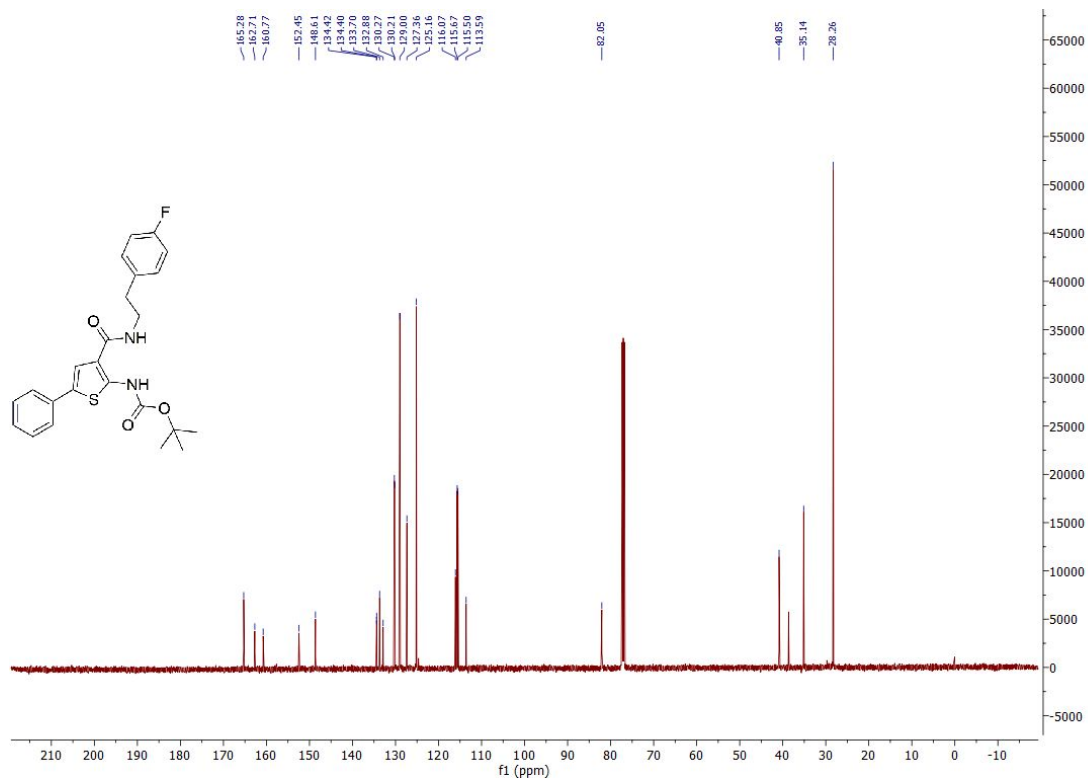

1569

1570  $^1\text{H}$  NMR spectrum of **BDA-29** (500 MHz,  $\text{CDCl}_3$ )

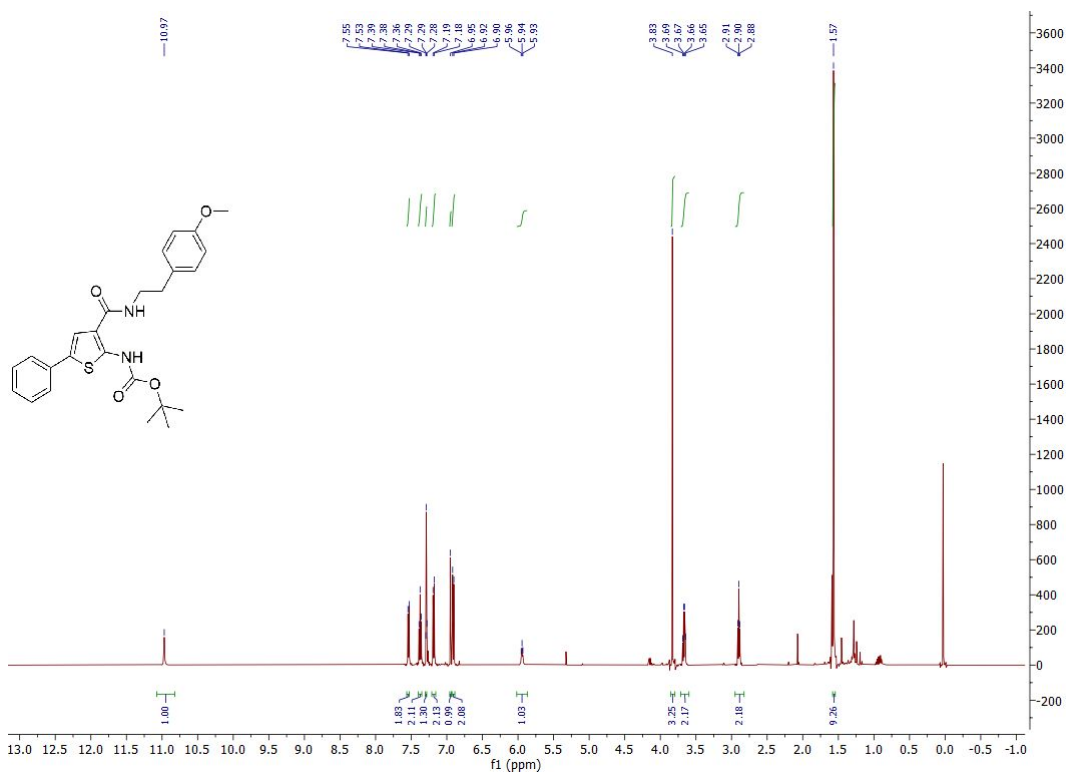

1571

1572  $^{13}\text{C}\{^1\text{H}\}$  NMR spectrum of **BDA-29** (126 MHz,  $\text{CDCl}_3$ )

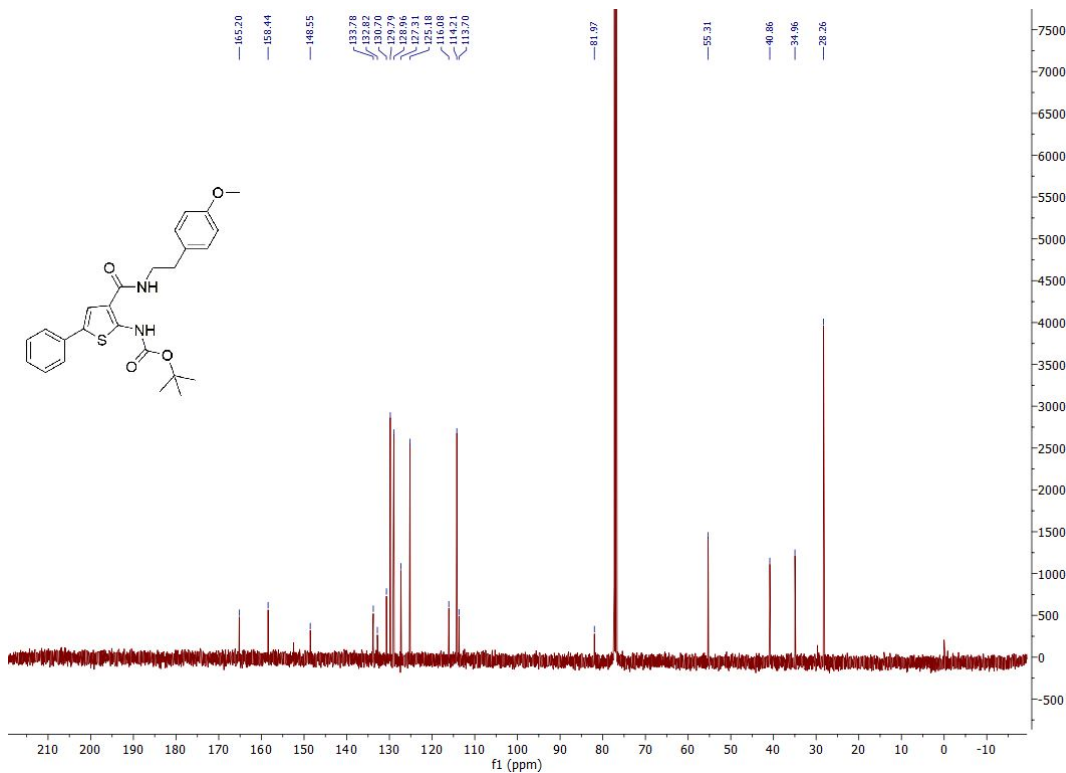

1573

1574

1575  $^1\text{H}$  NMR spectrum of **BDA-30** (500 MHz,  $\text{CDCl}_3$ )

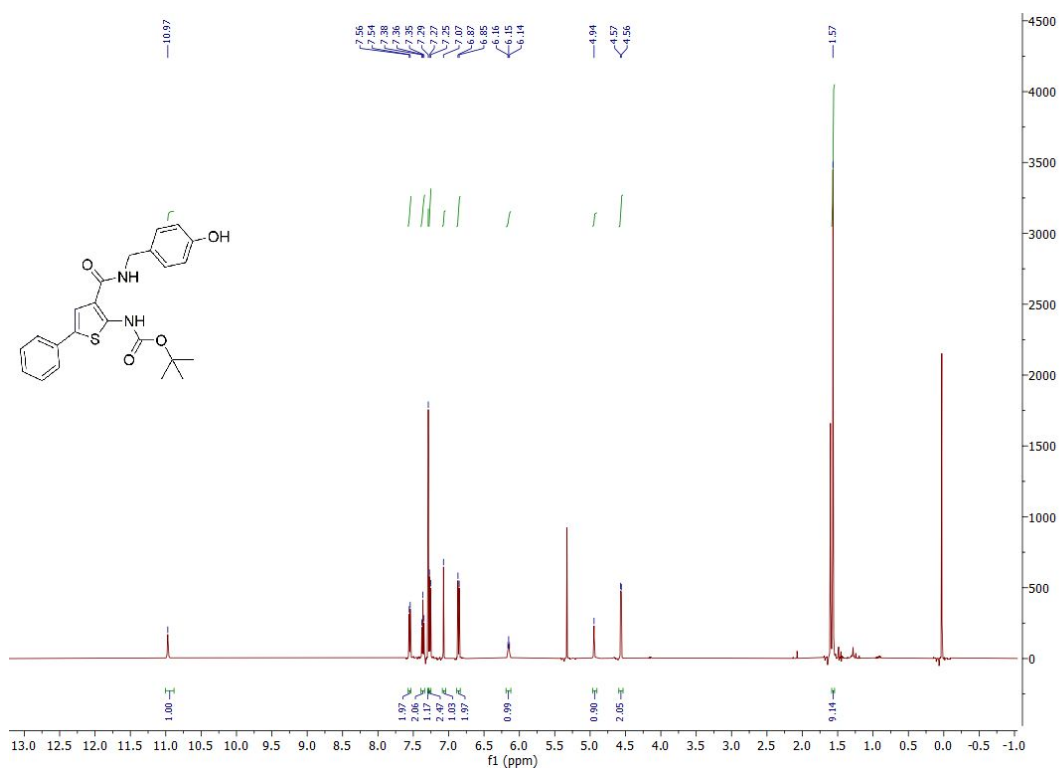

1576

1577  $^{13}\text{C}\{^1\text{H}\}$  NMR spectrum of **BDA-30** (126 MHz,  $\text{CDCl}_3$ )

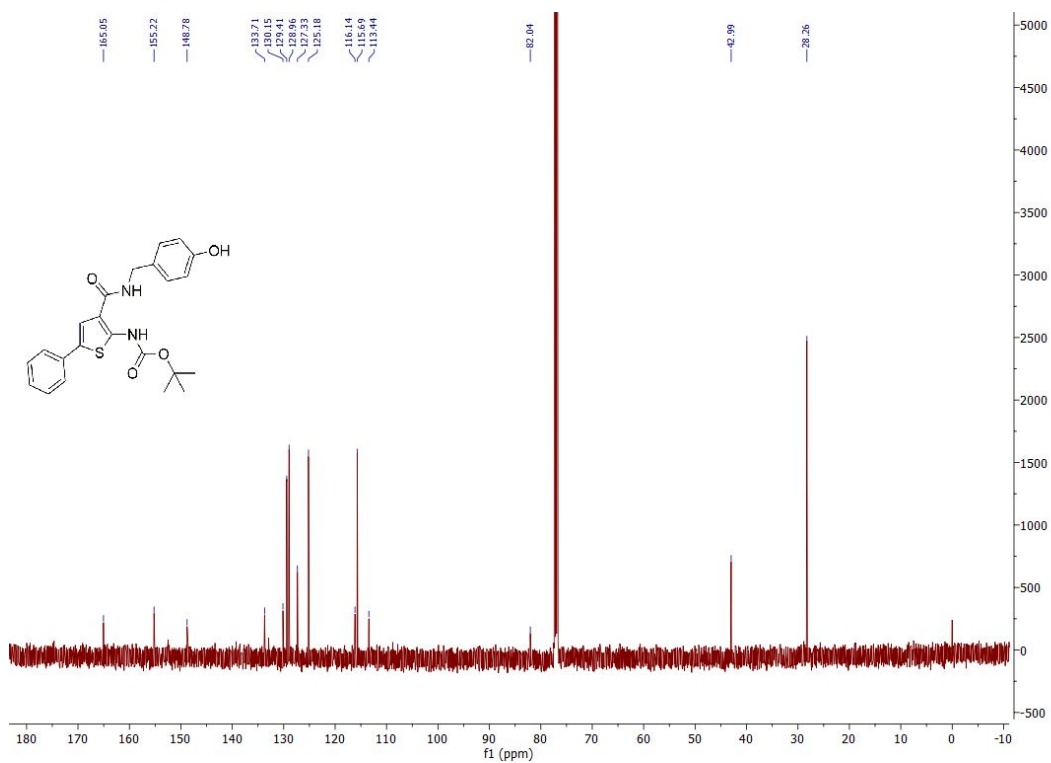

1578

1579

1580  $^1\text{H}$  NMR spectrum of **BDA-31** (500 MHz,  $\text{CDCl}_3$ )

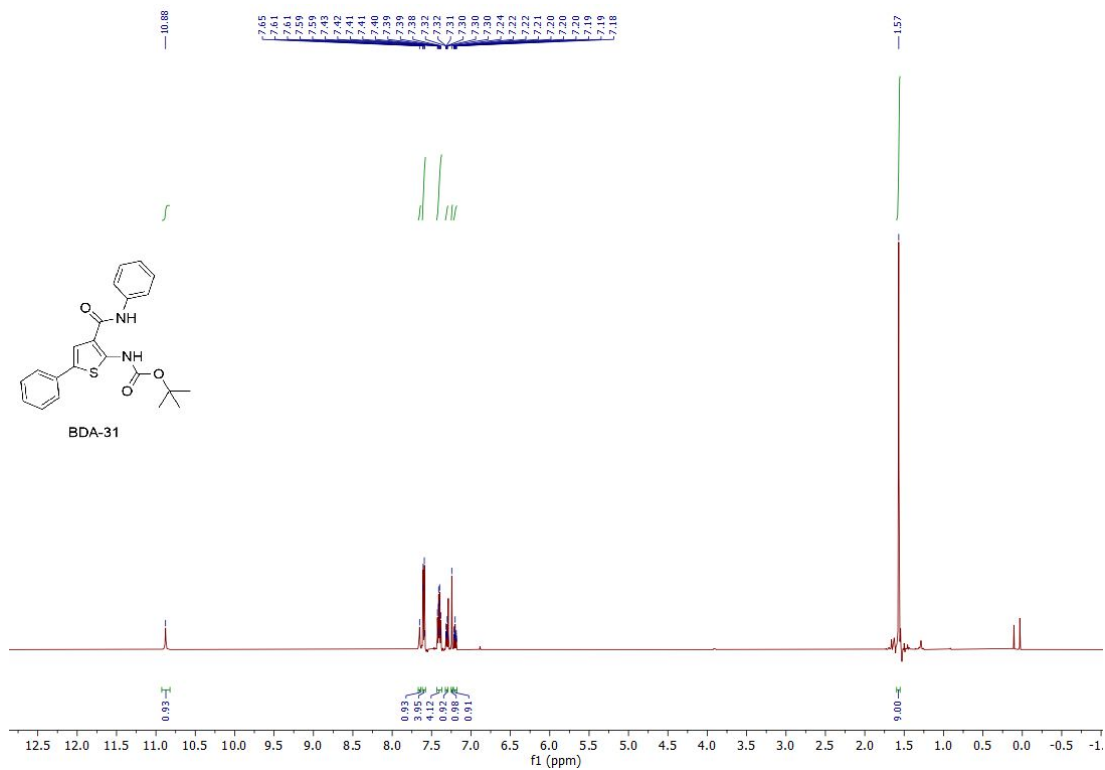

1581

1582  $^{13}\text{C}\{^1\text{H}\}$  NMR spectrum of **BDA-31** (126 MHz,  $\text{CDCl}_3$ )

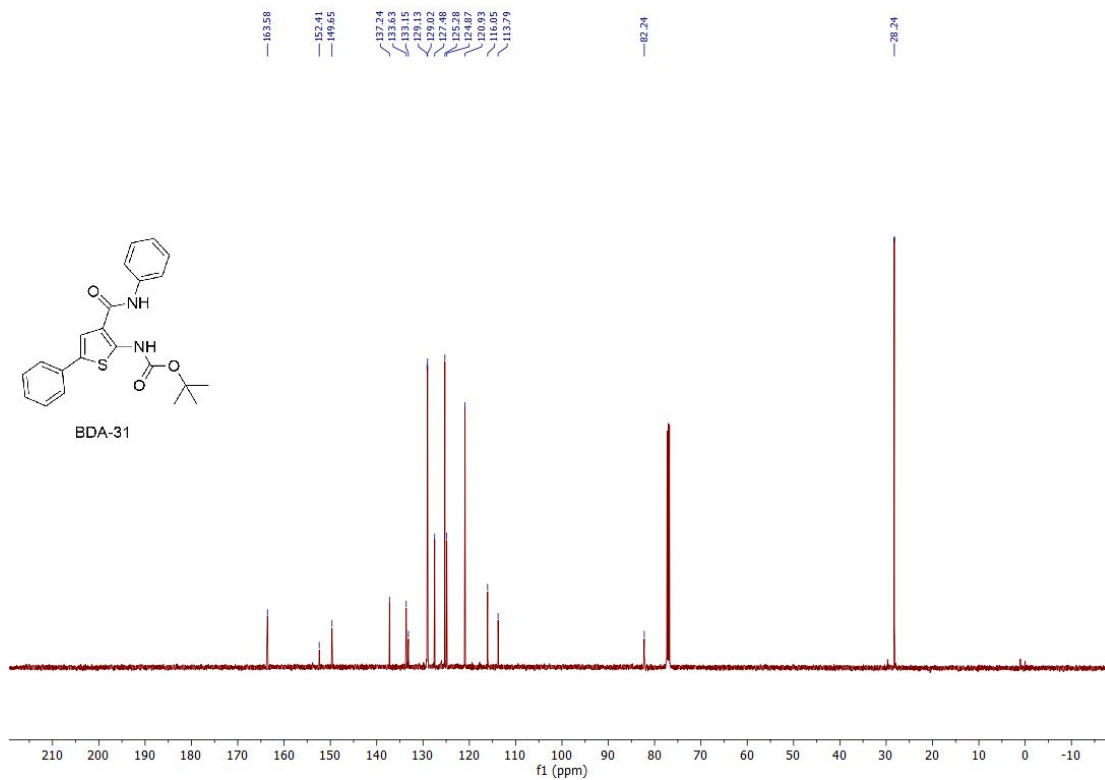

1583

1584  $^1\text{H}$  NMR spectrum of **BDA-32** (500 MHz,  $\text{CDCl}_3$ )

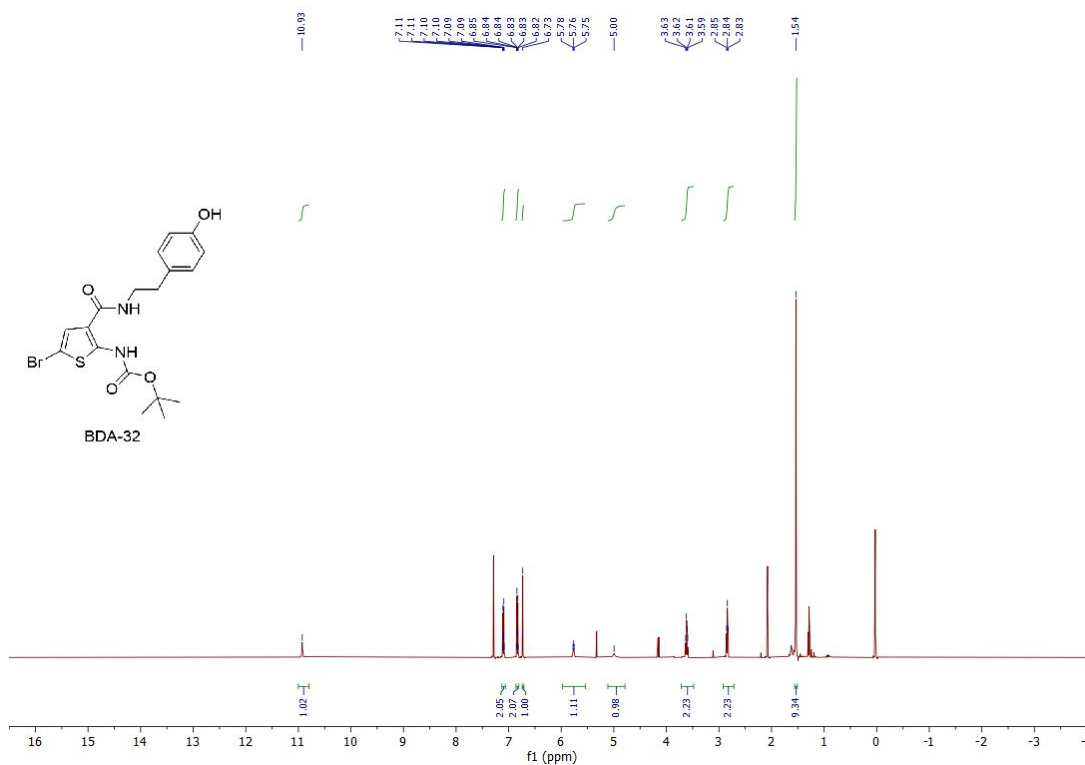

1585

1586  $^{13}\text{C}\{^1\text{H}\}$  NMR spectrum of **BDA-32** (126 MHz,  $\text{CDCl}_3$ )

1587

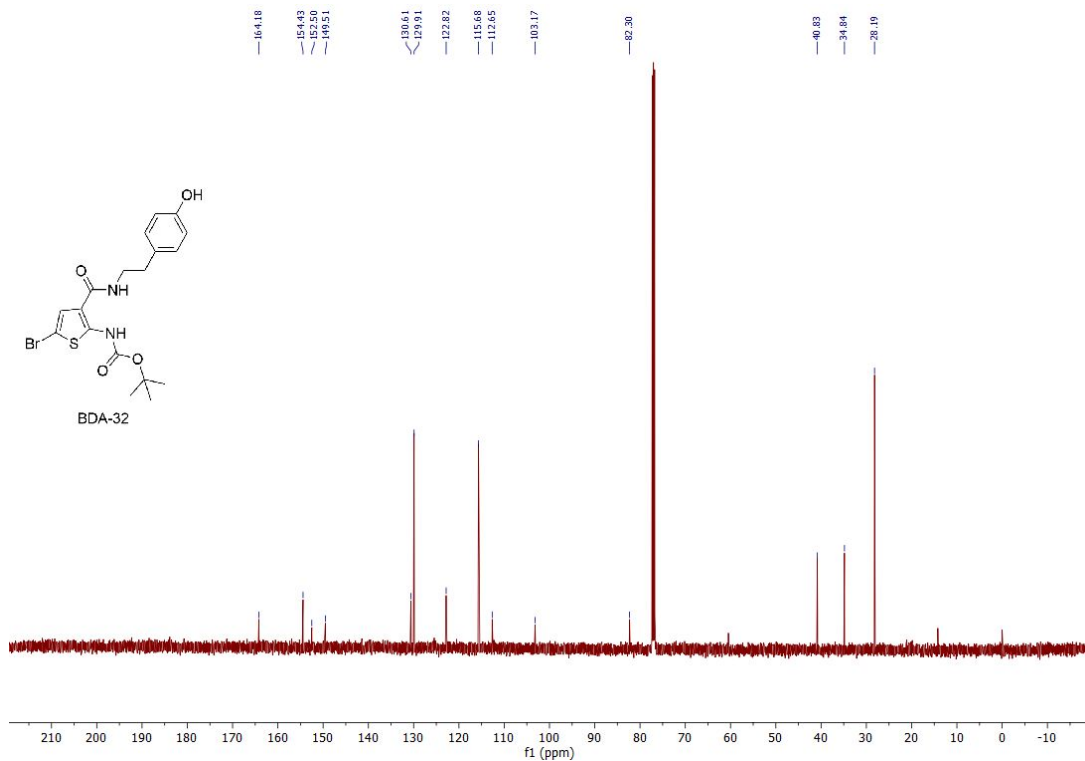

1588



1589  $^1\text{H}$  NMR spectrum of **BDA-33** (500 MHz,  $\text{CDCl}_3$ )

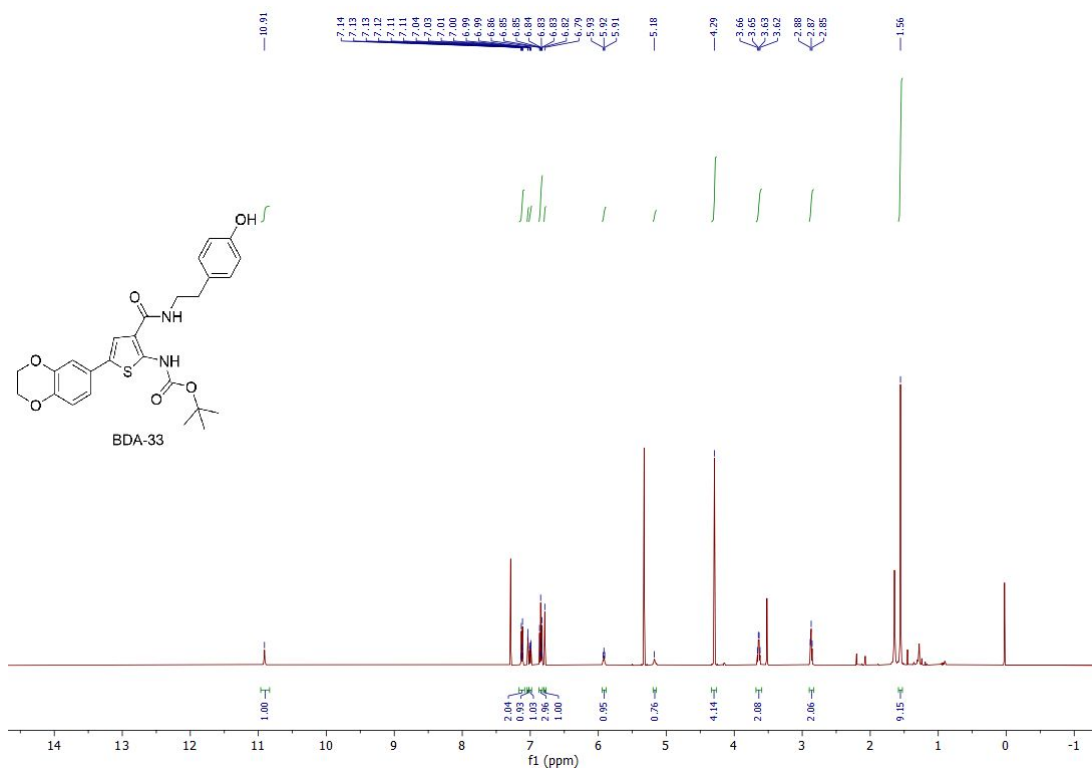

1590

1591  $^{13}\text{C}\{^1\text{H}\}$  NMR spectrum of **BDA-33** (126 MHz,  $\text{CDCl}_3$ )

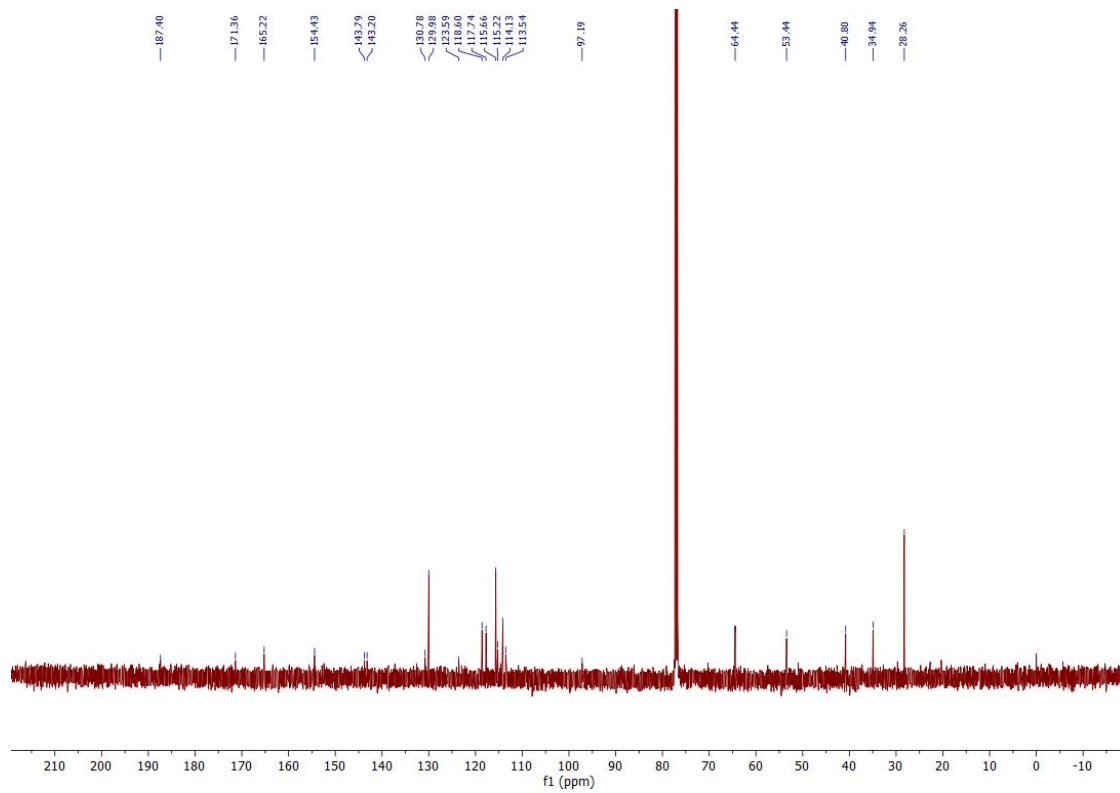

1592

1593  $^1\text{H}$  NMR spectrum of **BDA-34** (500 MHz,  $\text{CDCl}_3$ )

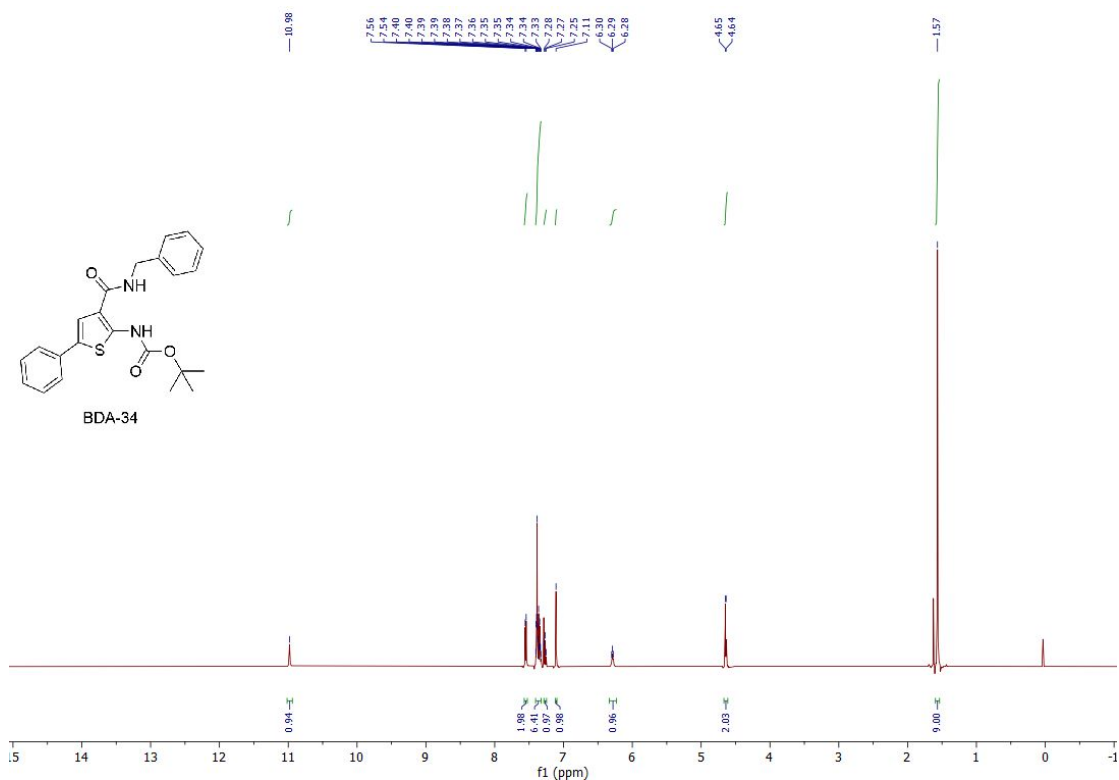

1594

1595  $^{13}\text{C}\{^1\text{H}\}$  NMR spectrum of **BDA-34** (126 MHz,  $\text{CDCl}_3$ )

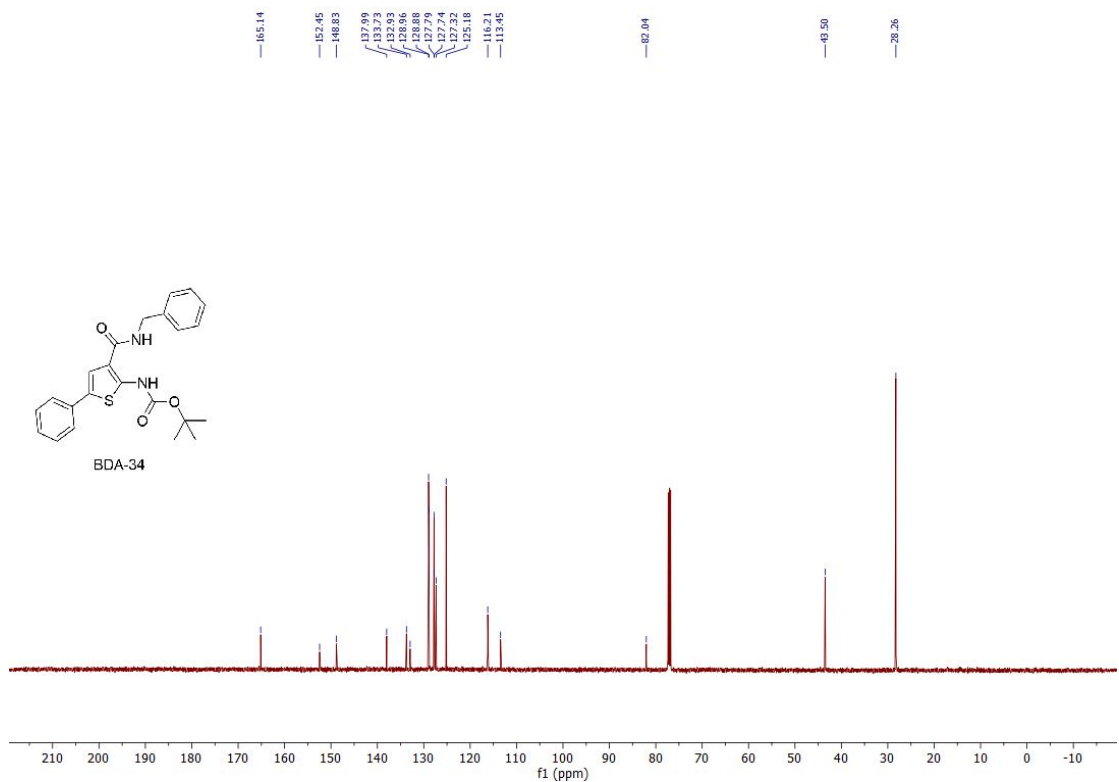

1596

1597  $^1\text{H}$  NMR spectrum of **BDA-35** (500 MHz,  $\text{DMSO-}d_6$ )

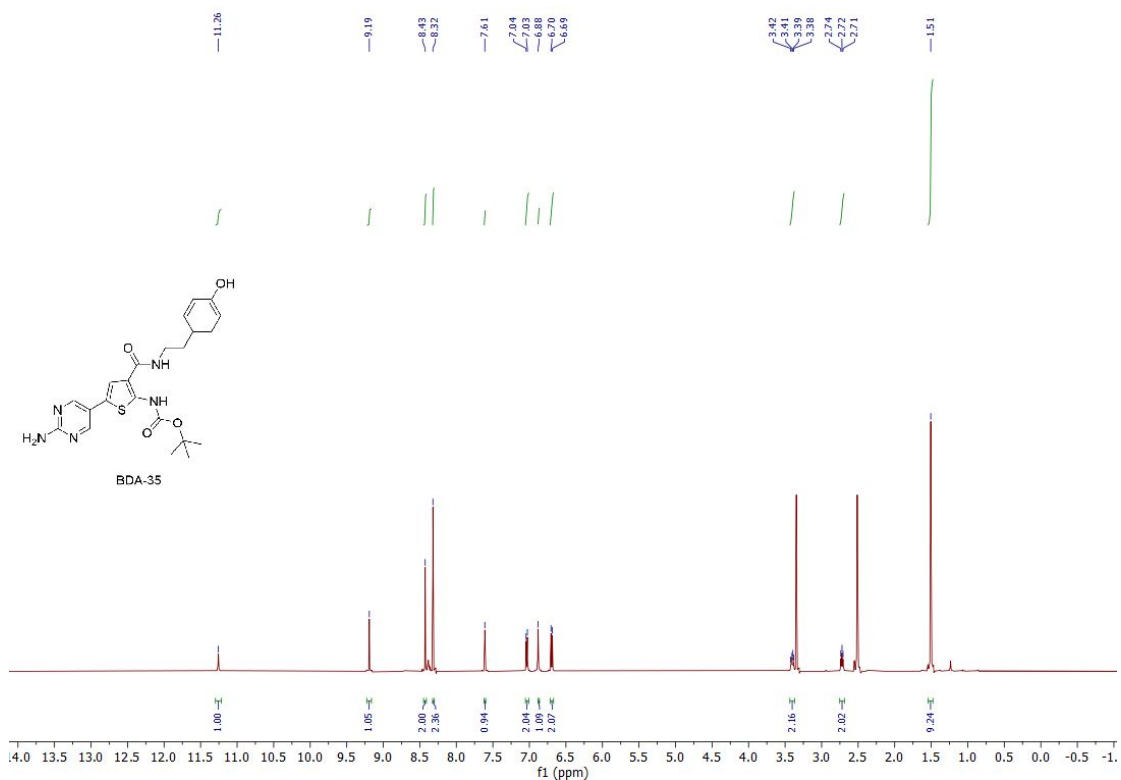

1598

1599  $^{13}\text{C}\{^1\text{H}\}$  NMR spectrum of **BDA-35** (126 MHz,  $\text{DMSO-}d_6$ )

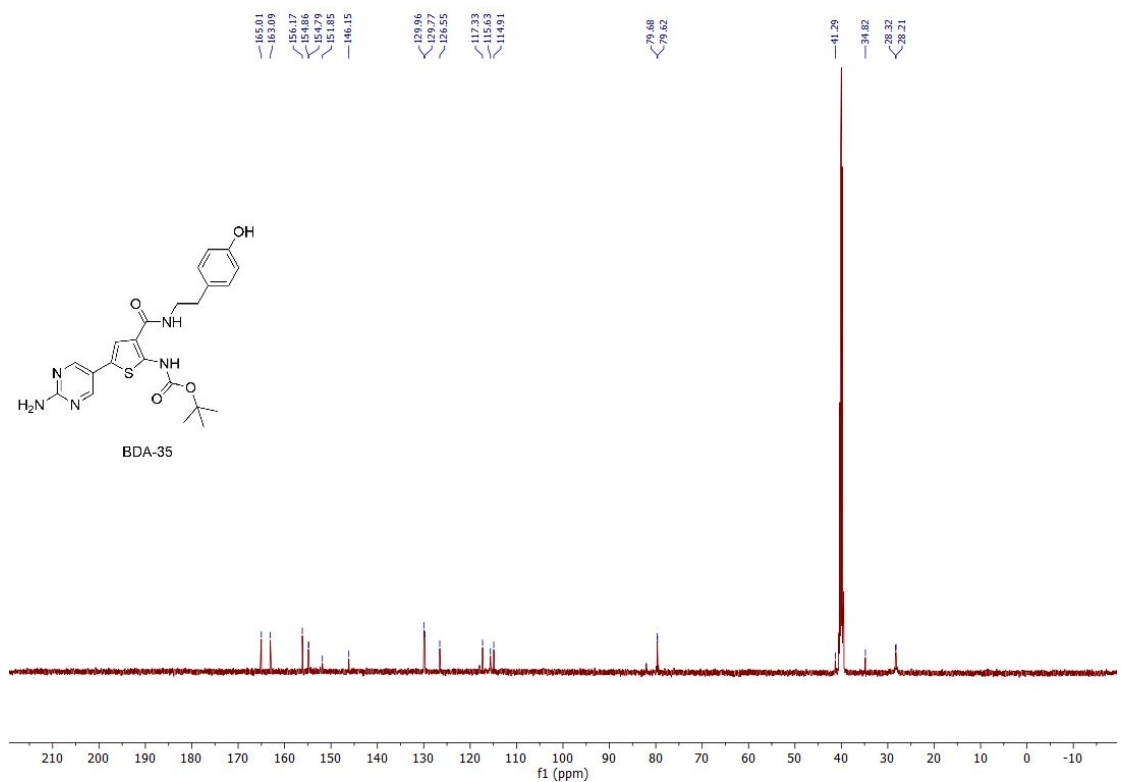

1600

1601  $^1\text{H}$  NMR spectrum of **BDA-36** (500 MHz,  $\text{CDCl}_3$ )

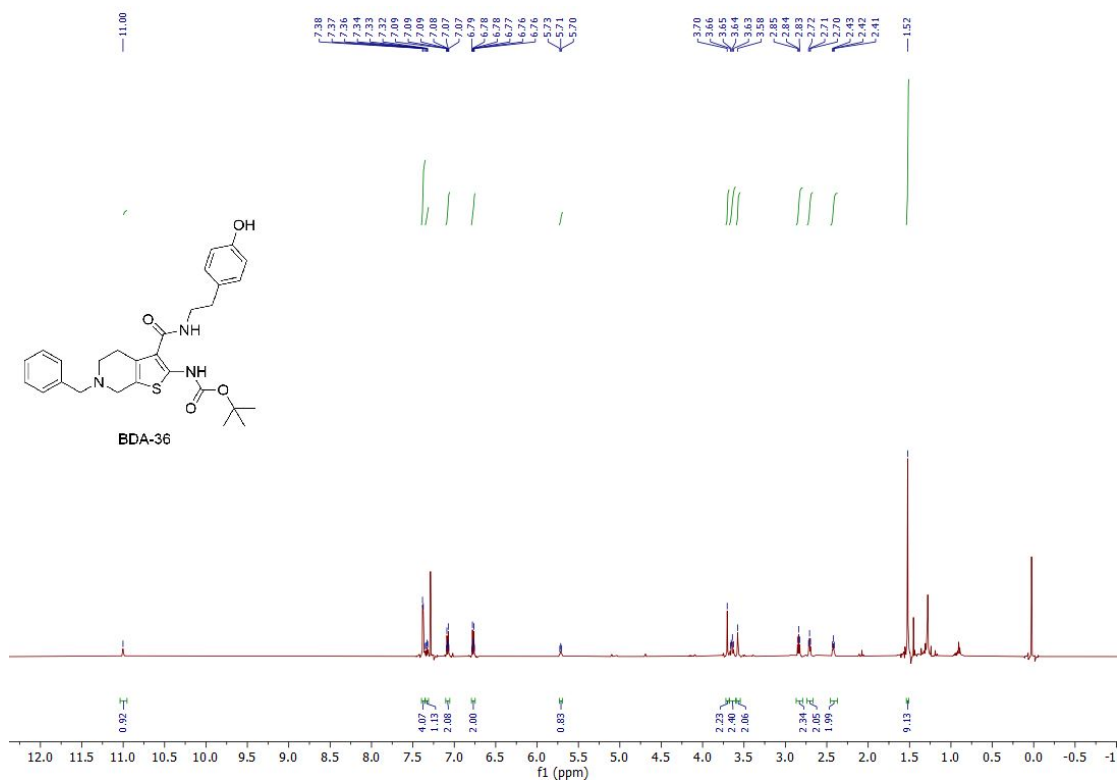

1602

1603  $^{13}\text{C}\{^1\text{H}\}$  NMR spectrum of **BDA-36** (126 MHz,  $\text{CDCl}_3$ )

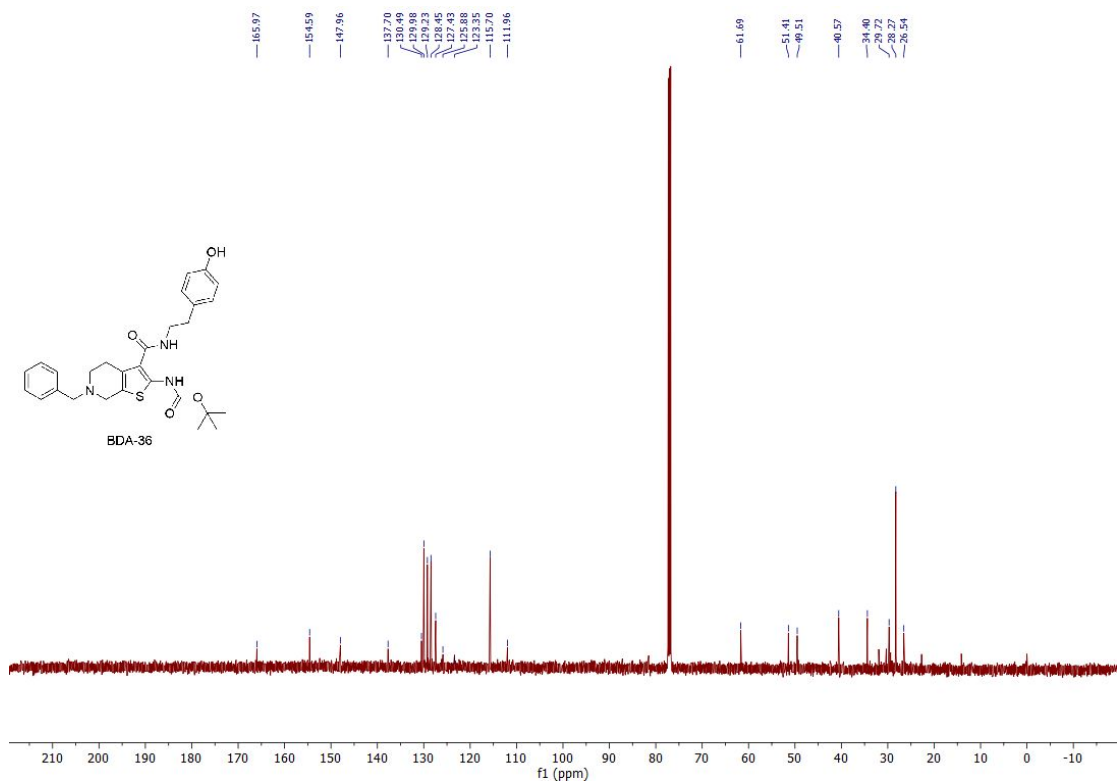

1604

1605  $^1\text{H}$  NMR spectrum of **BDA-37** (500 MHz,  $\text{CDCl}_3$ )

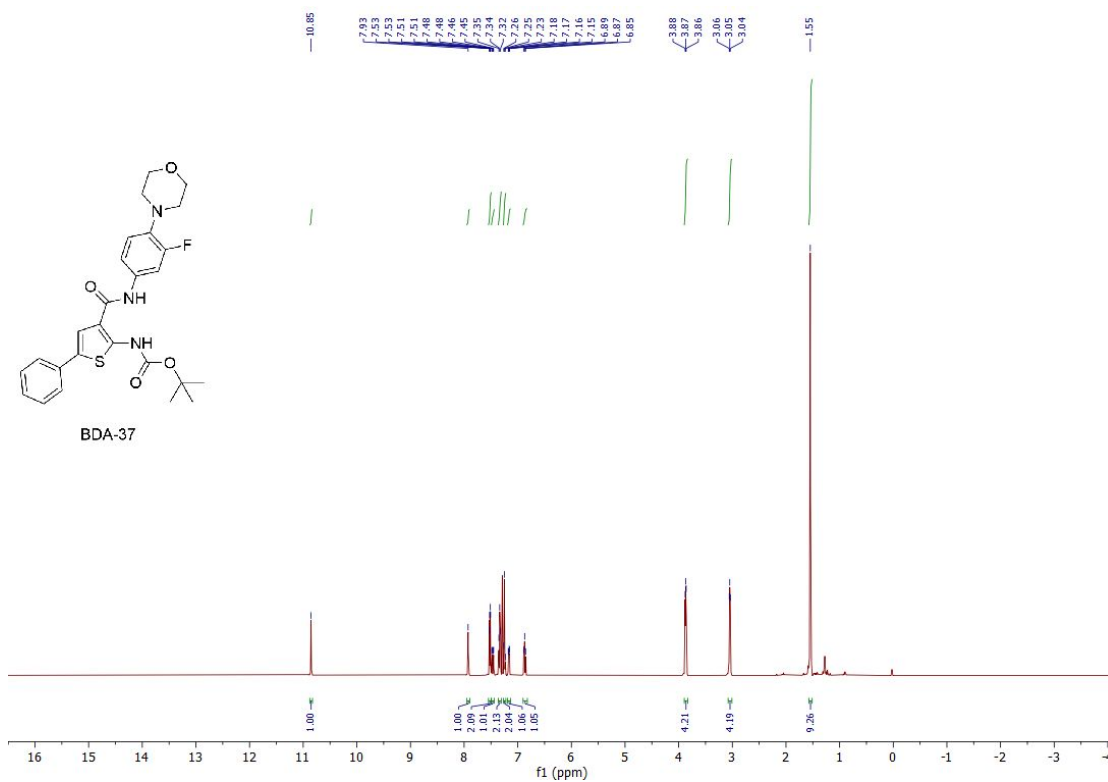

1606

1607  $^{13}\text{C}\{^1\text{H}\}$  NMR spectrum of **BDA-37** (126 MHz,  $\text{CDCl}_3$ )

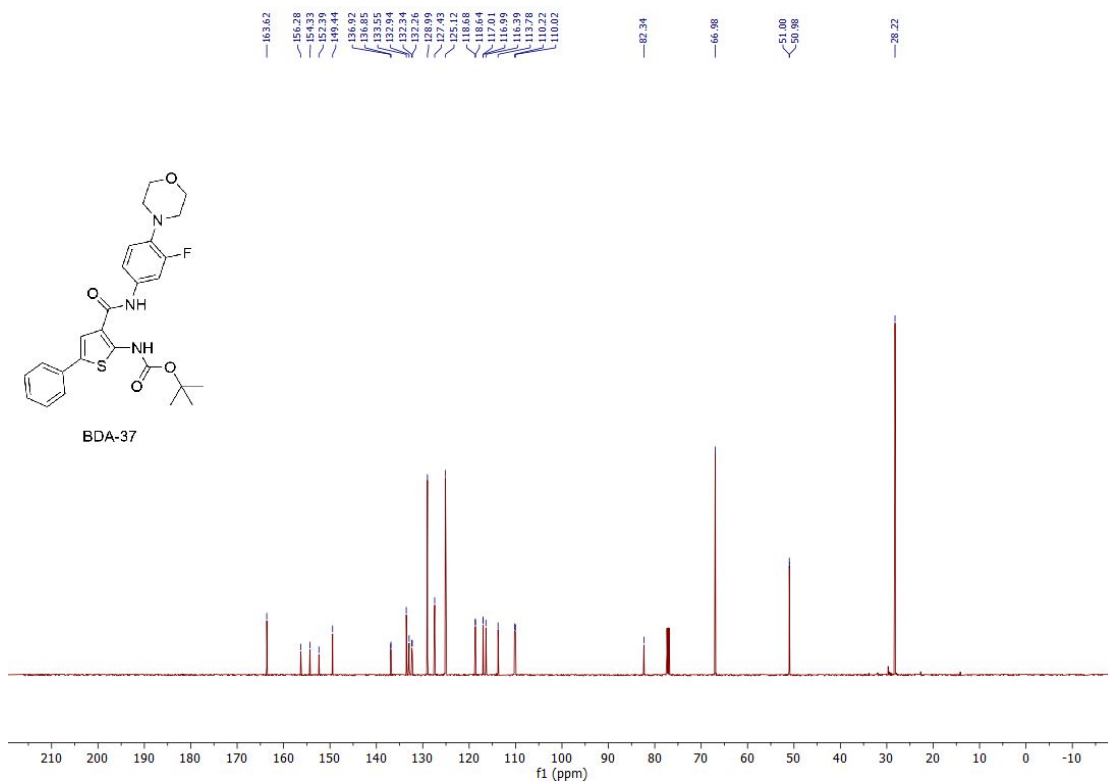

1608

1609  $^1\text{H}$  NMR spectrum of **BDA-38** (500 MHz,  $\text{CDCl}_3$ )

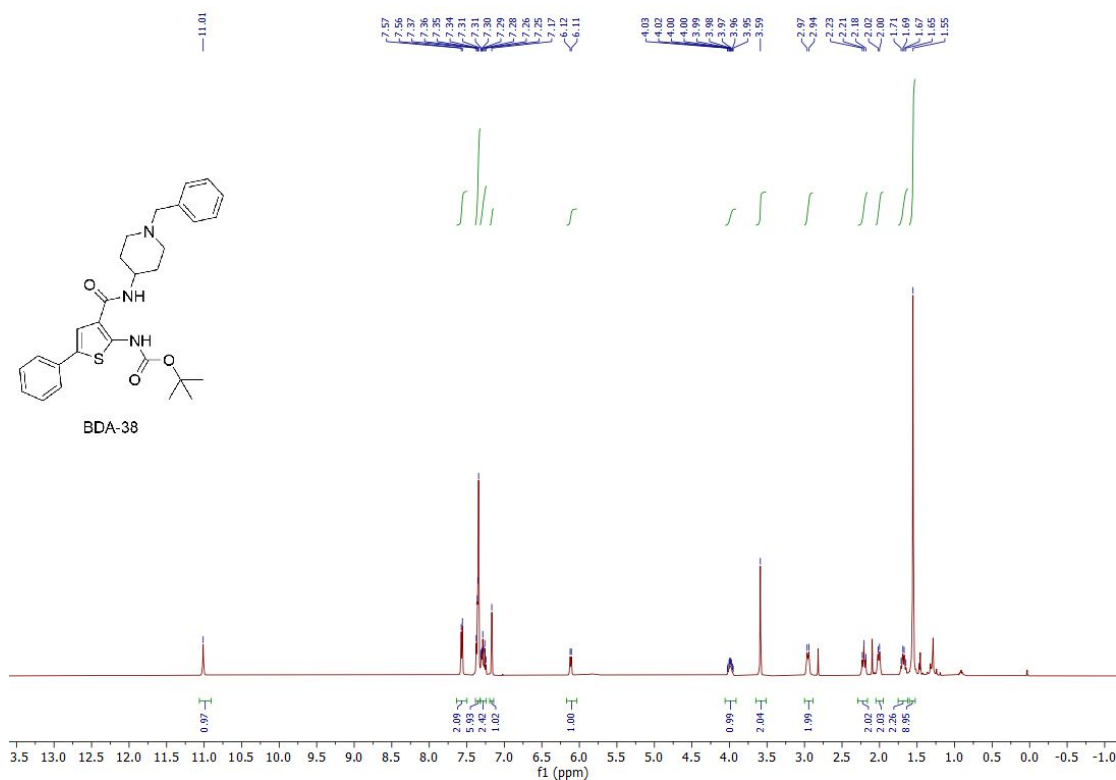

1610

1611  $^{13}\text{C}\{^1\text{H}\}$  NMR spectrum of **BDA-38** (126 MHz,  $\text{CDCl}_3$ )

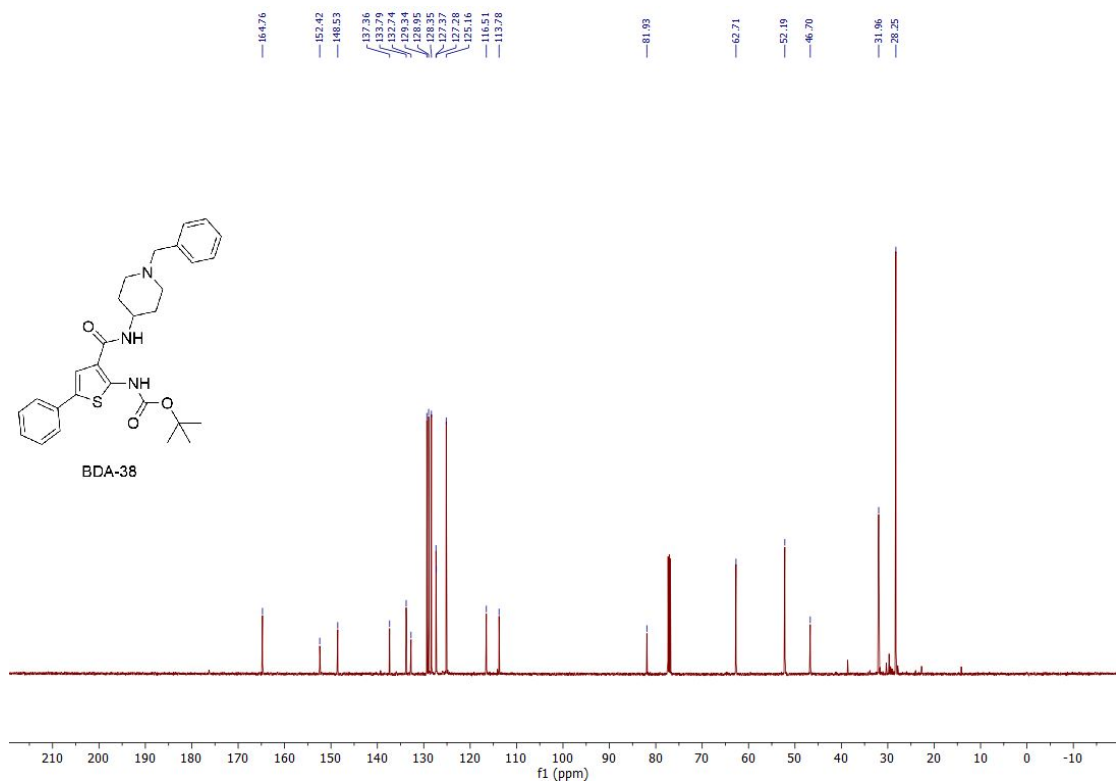

1612

1613  $^1\text{H}$  NMR spectrum of **BDA-39** (500 MHz,  $\text{CDCl}_3$ )

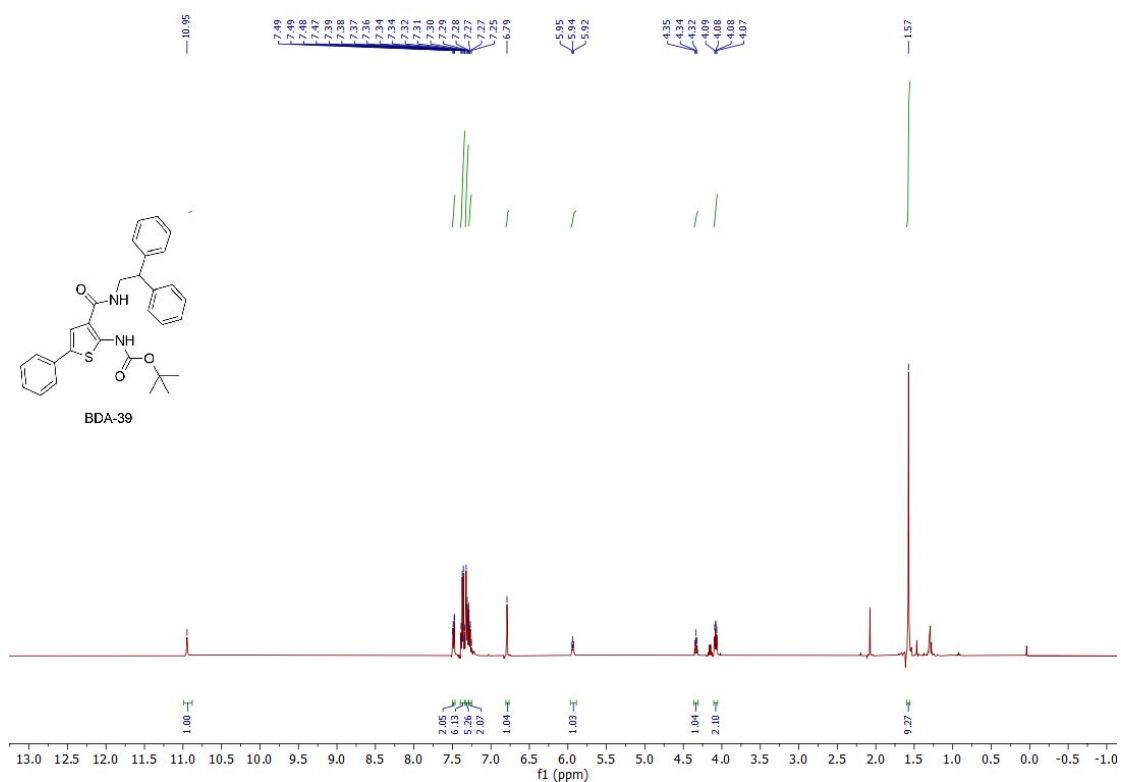

1614

1615  $^{13}\text{C}\{^1\text{H}\}$  NMR spectrum of **BDA-39** (126 MHz,  $\text{CDCl}_3$ )

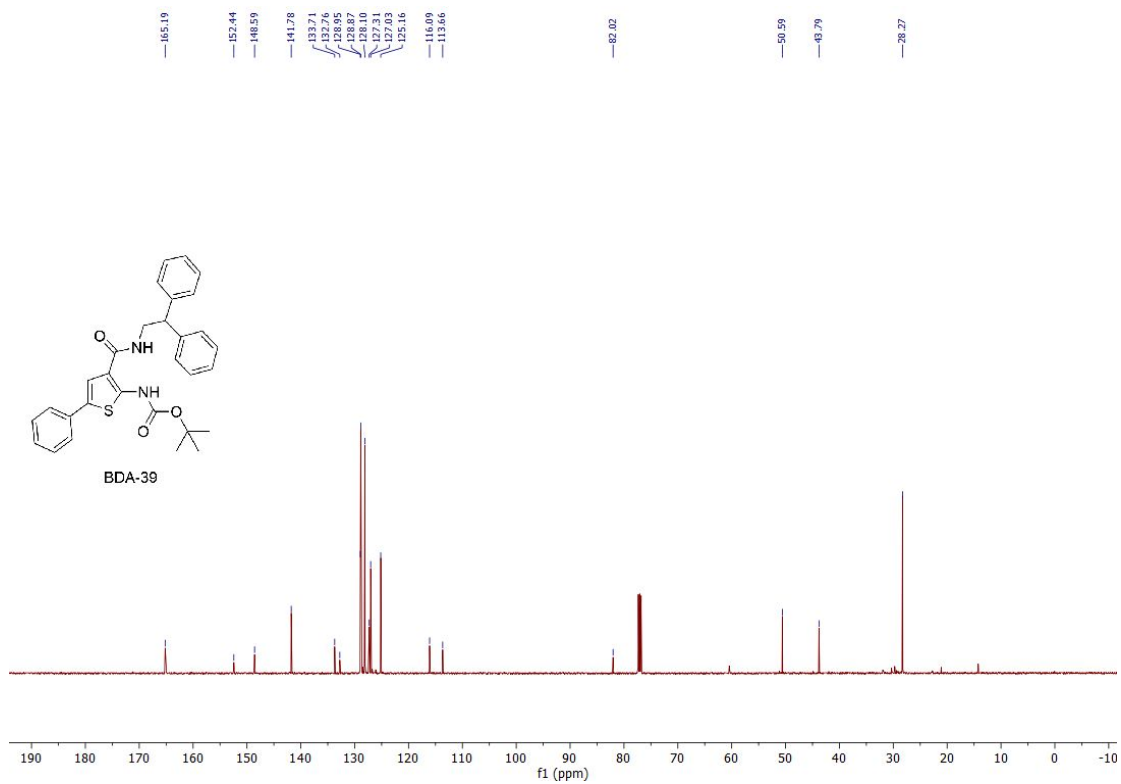

1616

1617  $^1\text{H}$  NMR spectrum of **BDA-40** (500 MHz,  $\text{CDCl}_3$ )

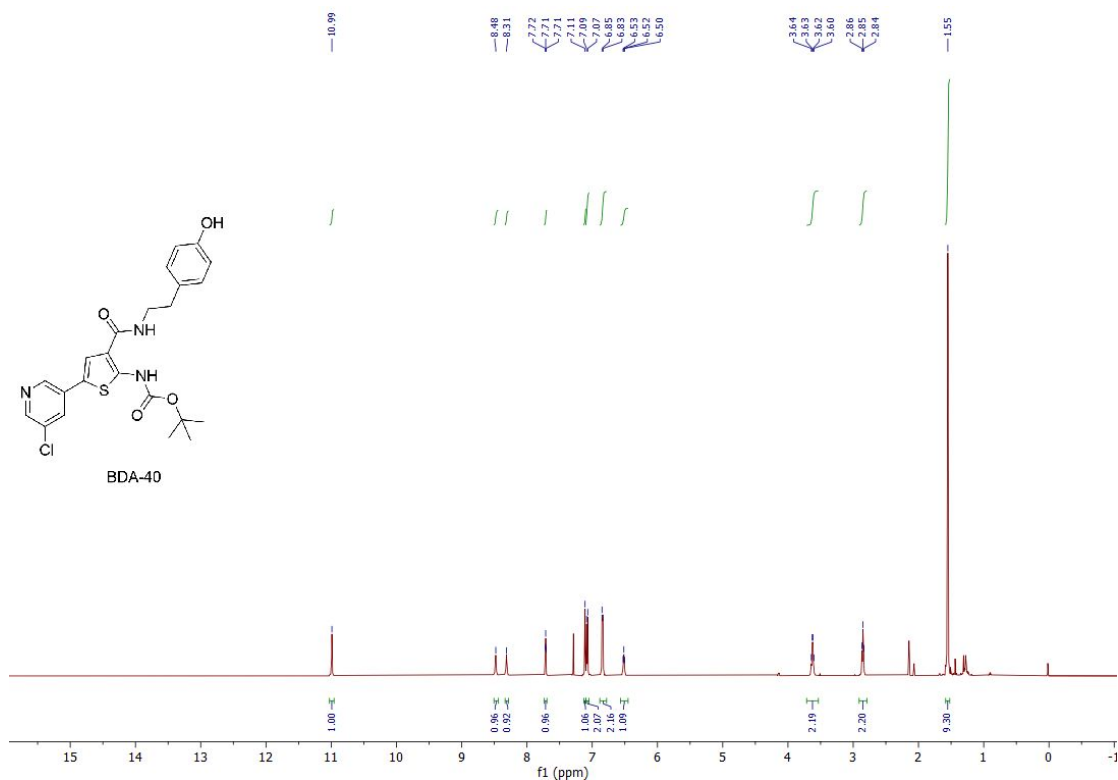

1618

1619  $^{13}\text{C}\{^1\text{H}\}$  NMR spectrum of **BDA-40** (126 MHz,  $\text{CDCl}_3$ )

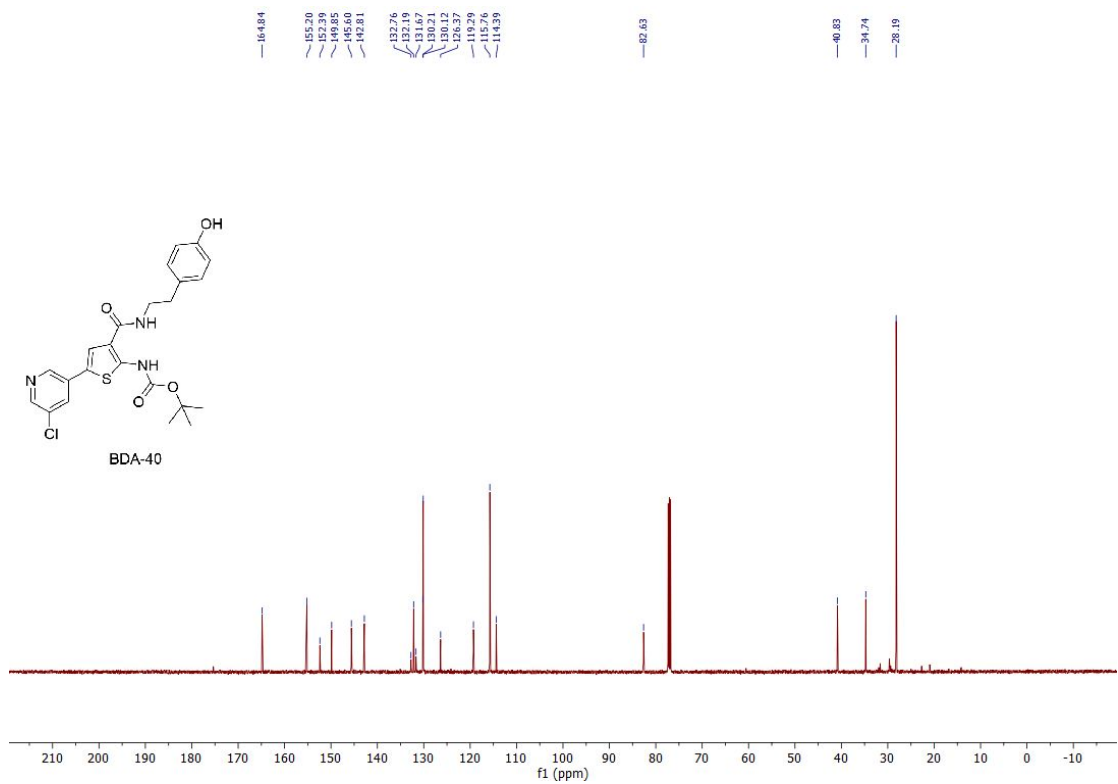

1620



1621  $^1\text{H}$  NMR spectrum of **BDA-41** (500 MHz,  $\text{DMSO-}d_6$ )

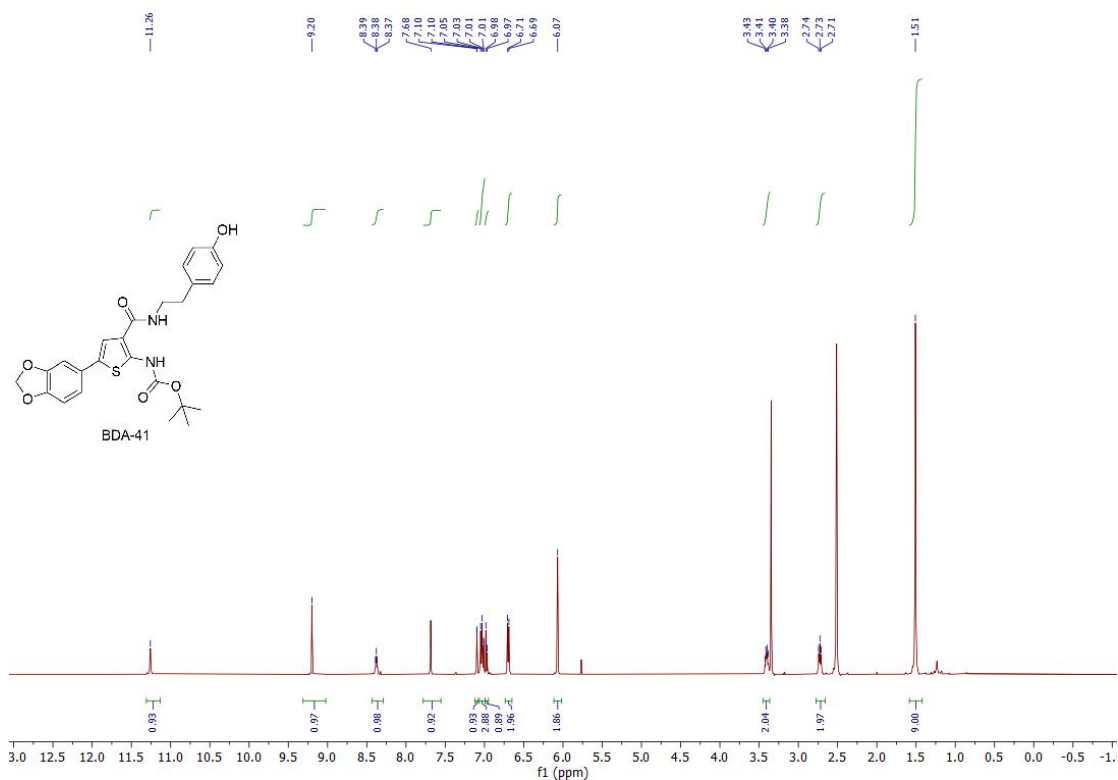

1622

1623  $^{13}\text{C}\{^1\text{H}\}$  NMR spectrum of **BDA-41** (126 MHz,  $\text{DMSO-}d_6$ )

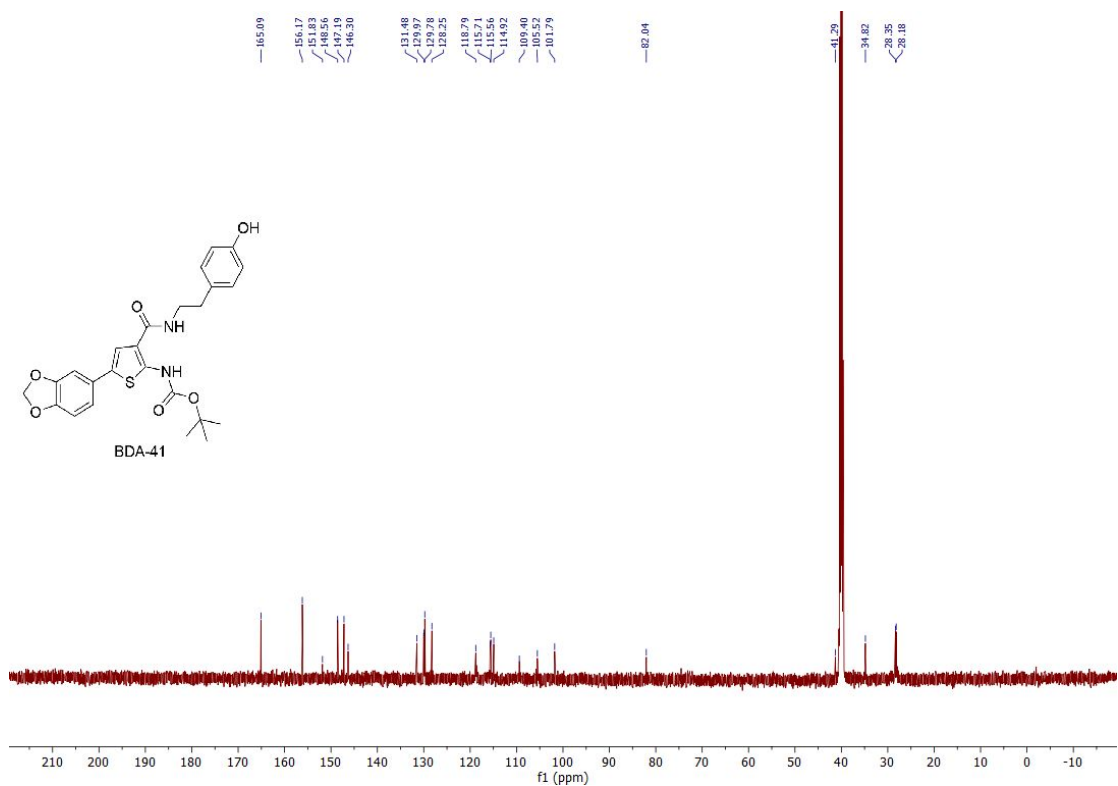

1624

1625  $^1\text{H}$  NMR spectrum of **BDA-42** (500 MHz,  $\text{CDCl}_3$ )

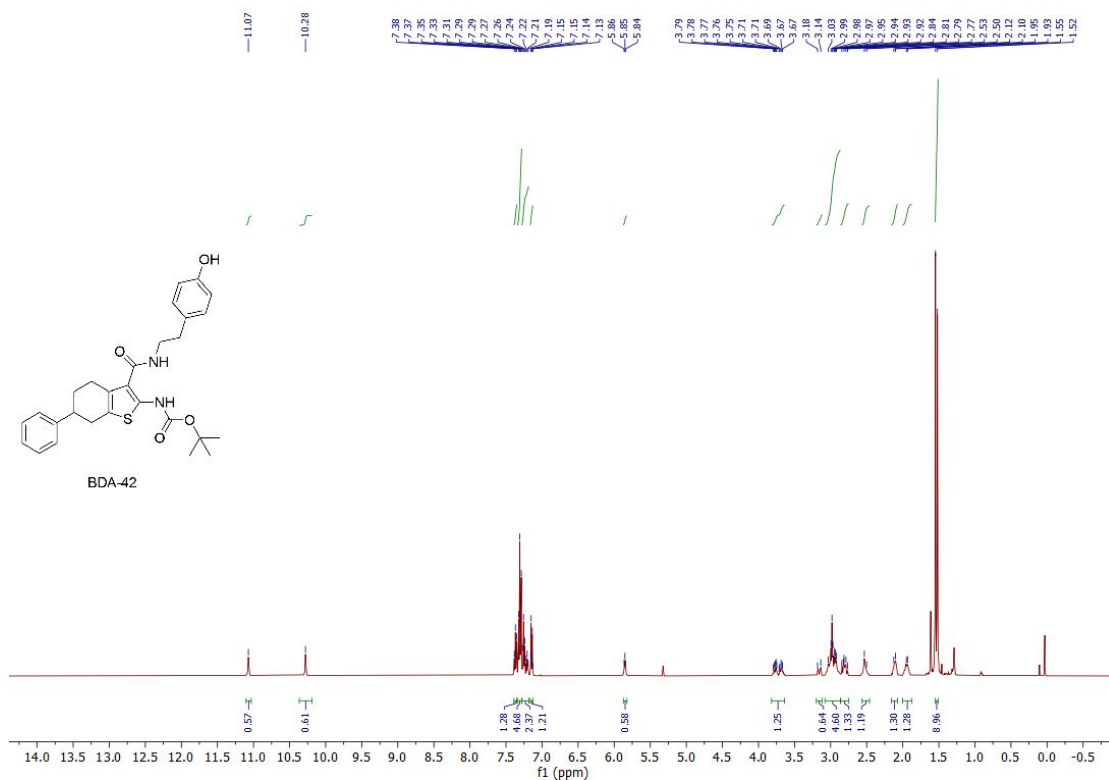

1626

1627  $^{13}\text{C}\{^1\text{H}\}$  NMR spectrum of **BDA-42** (126 MHz,  $\text{CDCl}_3$ )

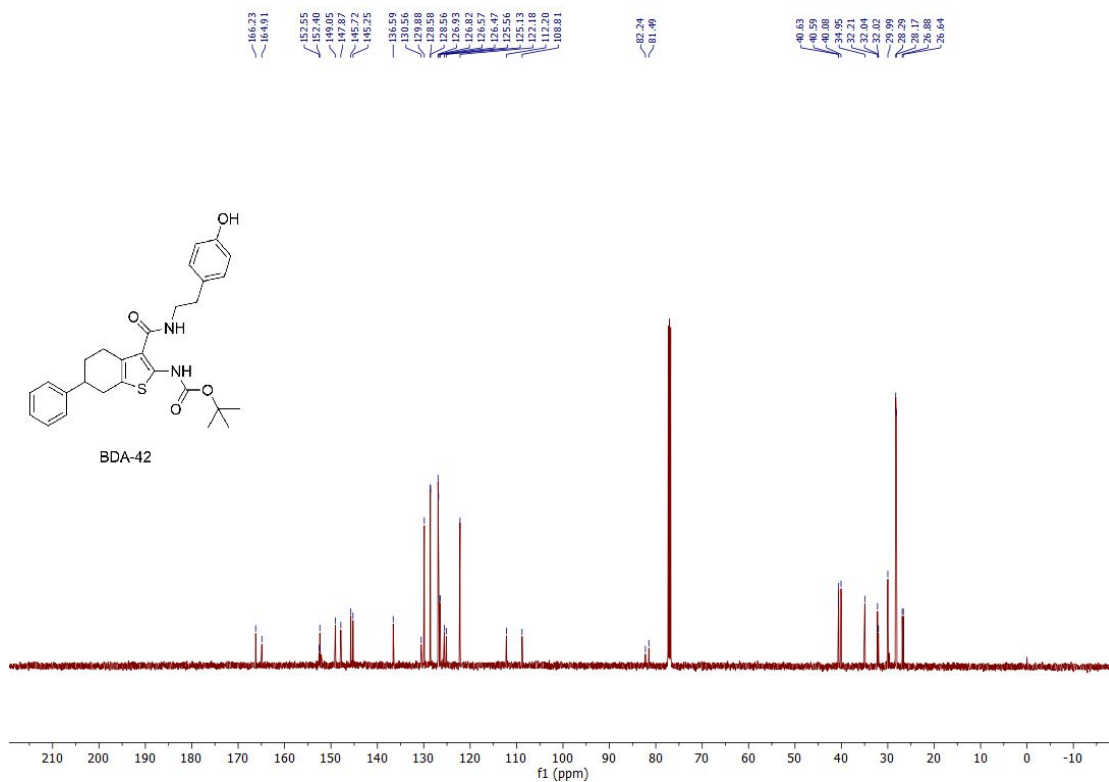

1628

1629  $^1\text{H}$  NMR spectrum of **BDA-43** (500 MHz,  $\text{CDCl}_3$ )

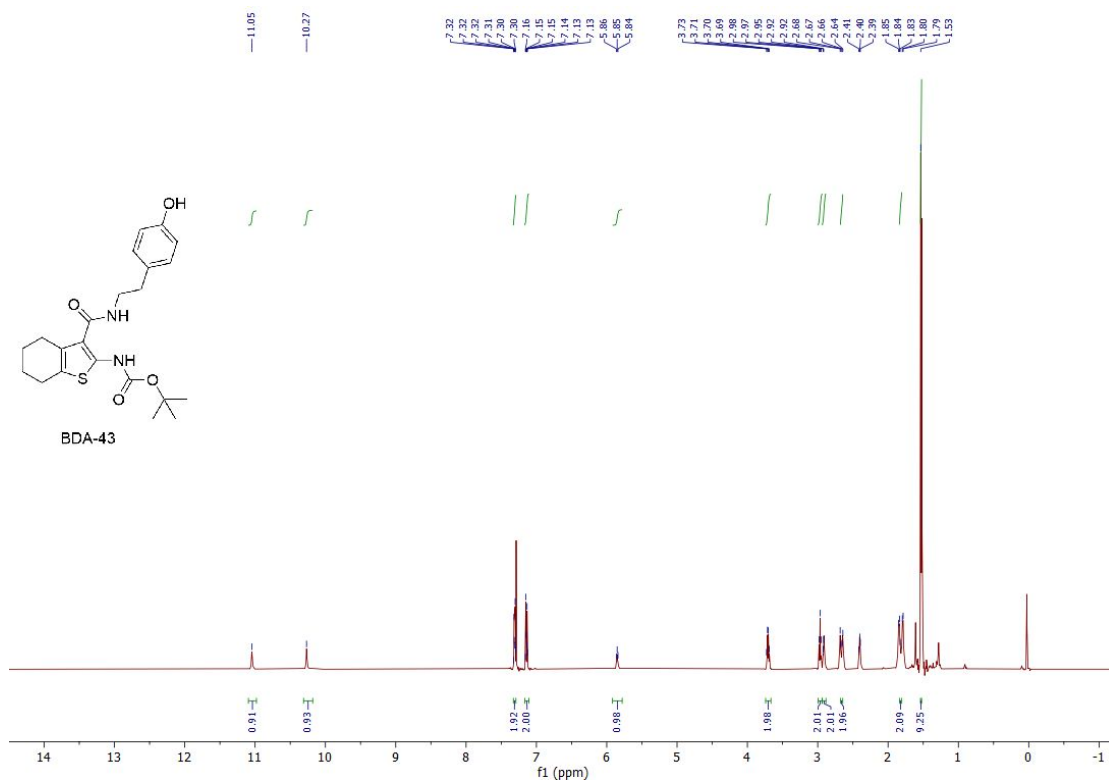

1630

1631  $^{13}\text{C}\{^1\text{H}\}$  NMR spectrum of **BDA-43** (126 MHz,  $\text{CDCl}_3$ )

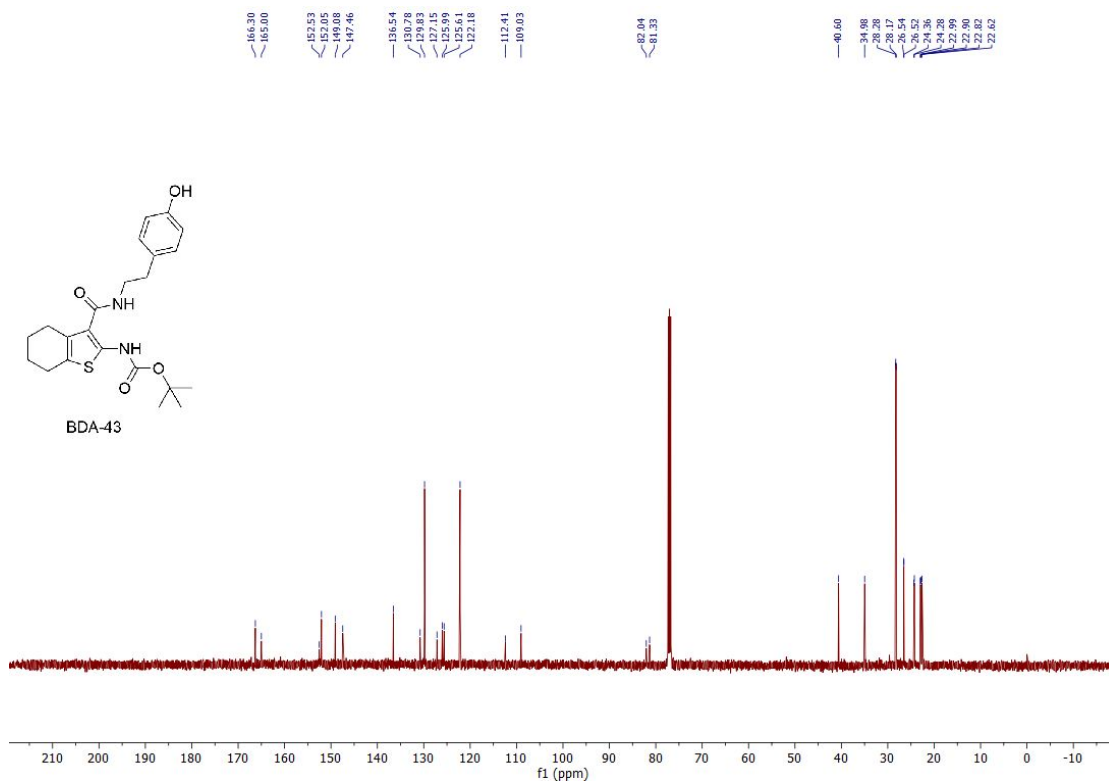

1632

1633  $^1\text{H}$  NMR spectrum of **BDA-44** (500 MHz,  $\text{DMSO-}d_6$ )

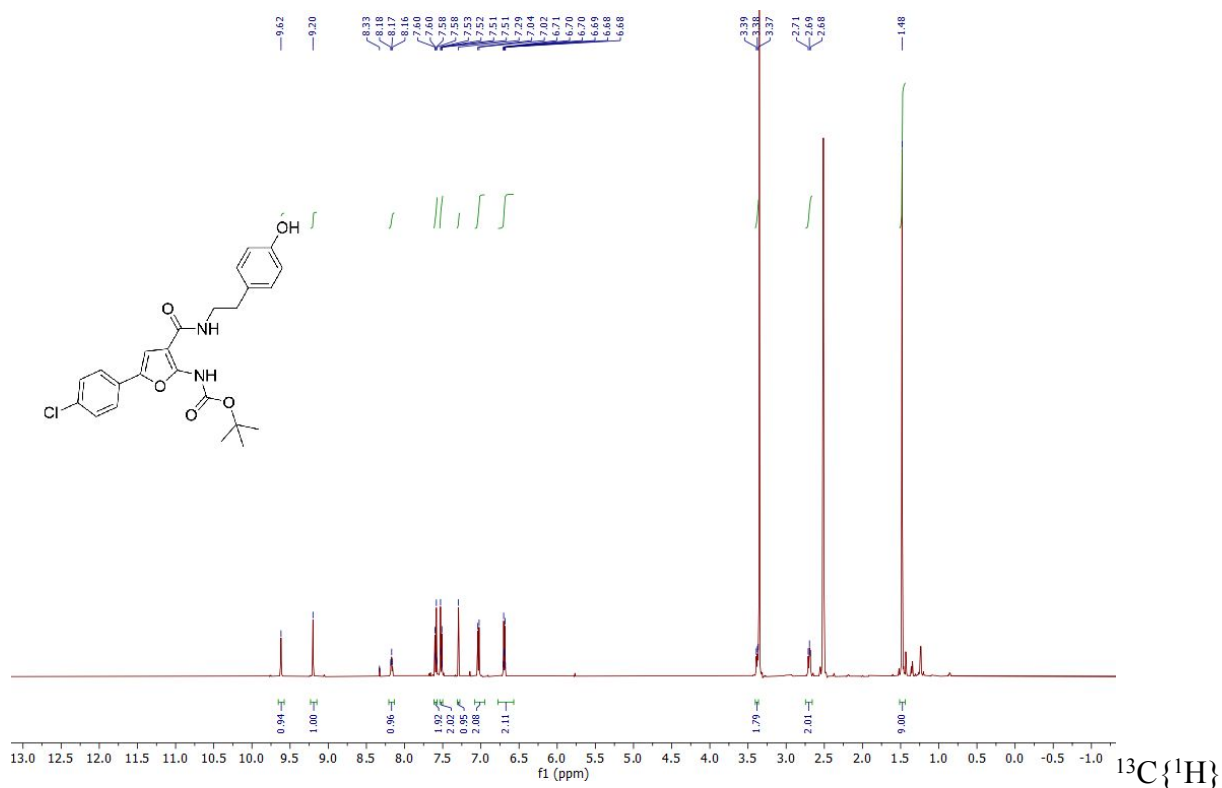

1634

1635 NMR spectrum of **BDA-44** (126 MHz,  $\text{DMSO-}d_6$ )

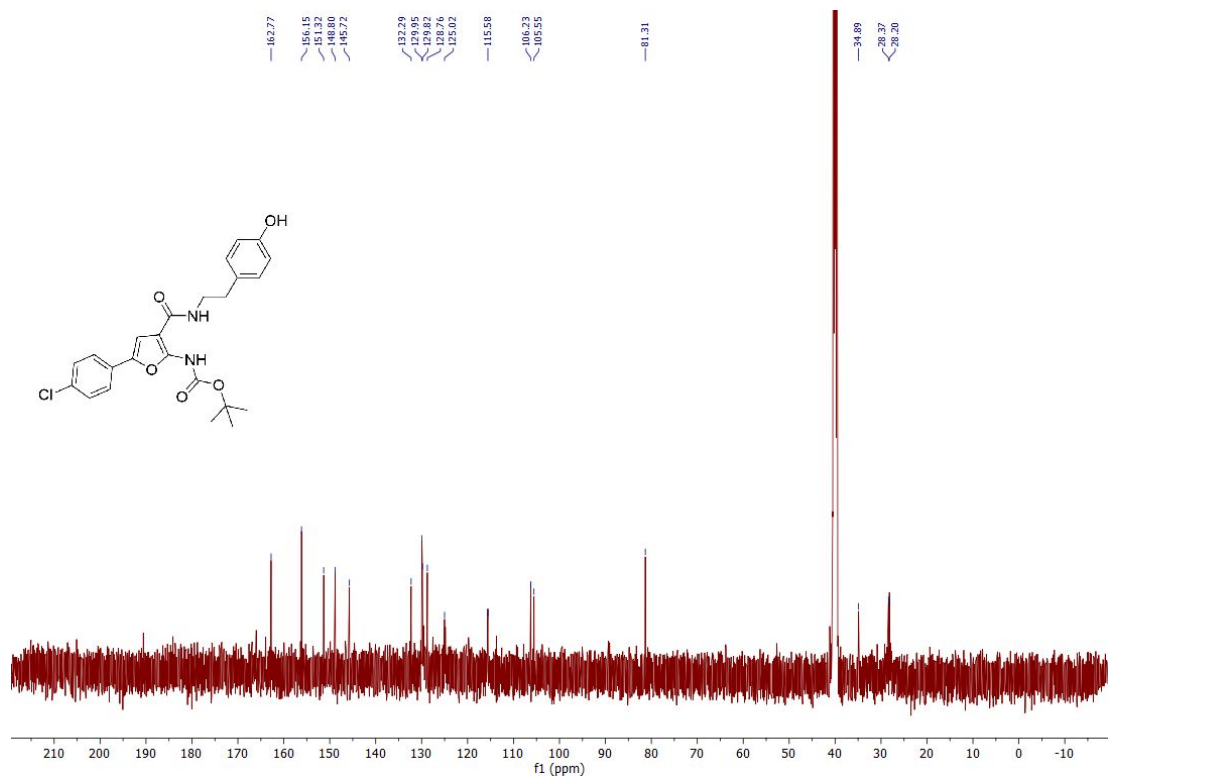

1636



1641  $^1\text{H}$  NMR spectrum of **BDA-46** (500 MHz,  $\text{CDCl}_3$ )

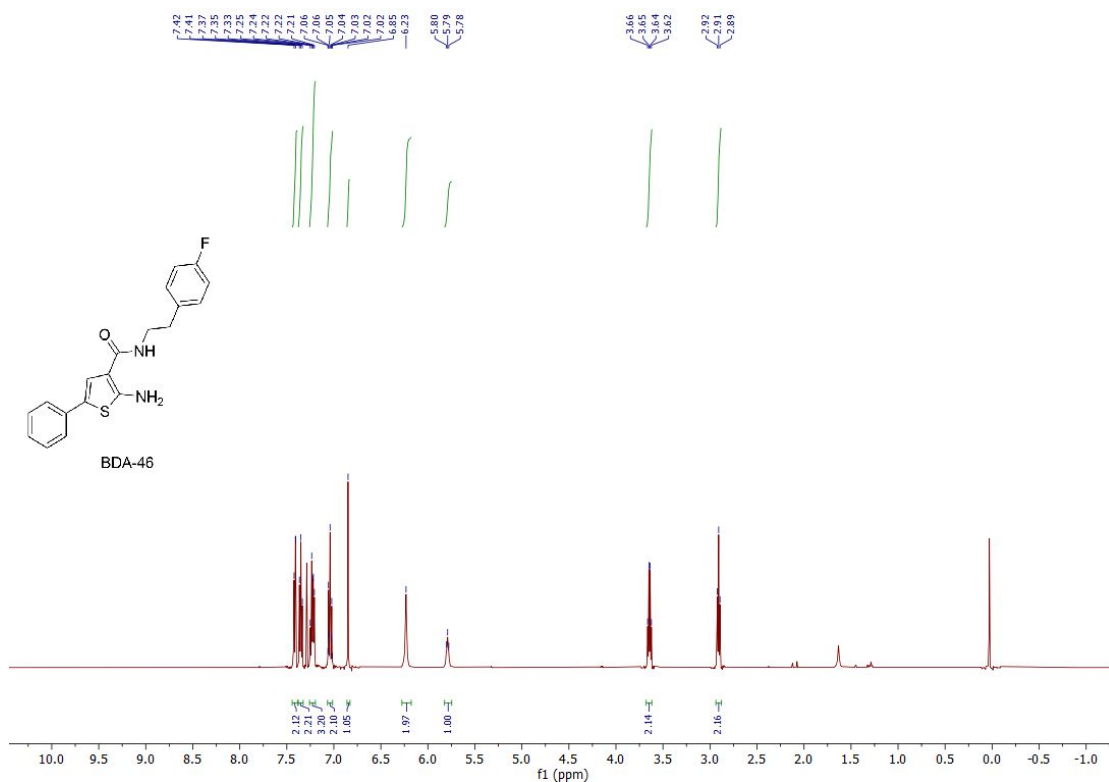

1642

1643  $^{13}\text{C}\{^1\text{H}\}$  NMR spectrum of **BDA-46** (126 MHz,  $\text{CDCl}_3$ )

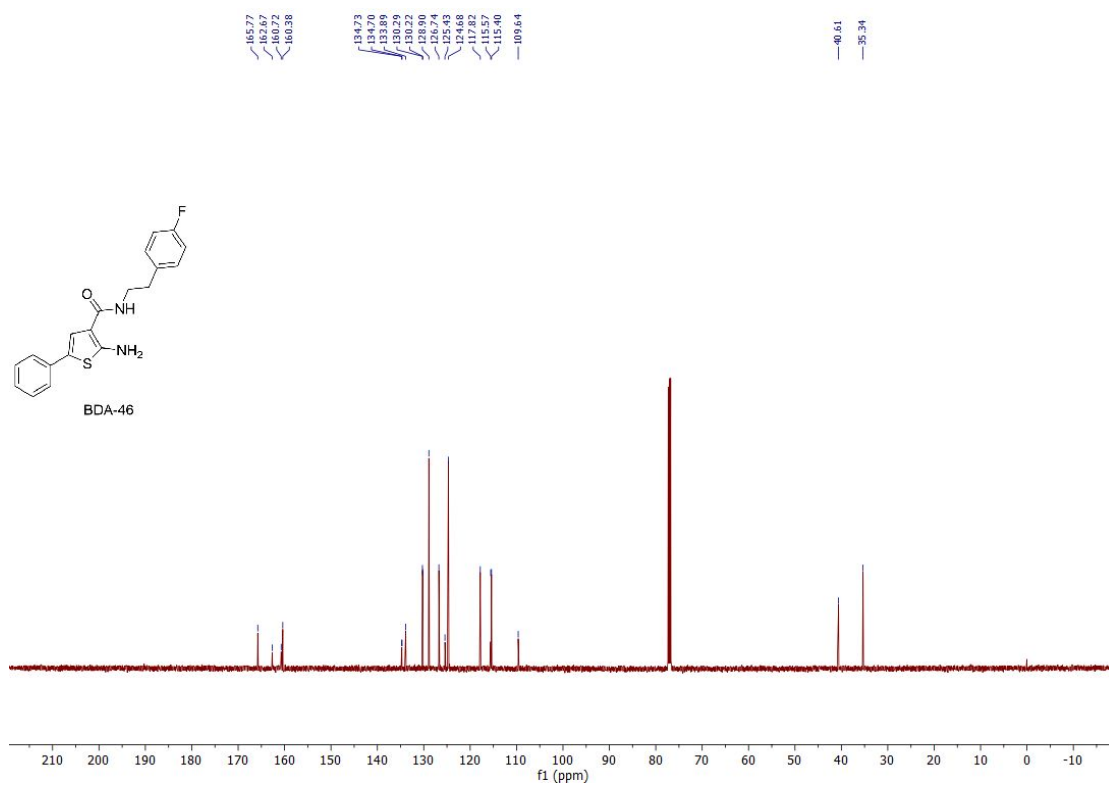

1644

1645  $^1\text{H}$  NMR spectrum of **BDA-47** (500 MHz,  $\text{DMSO-}d_6$ )

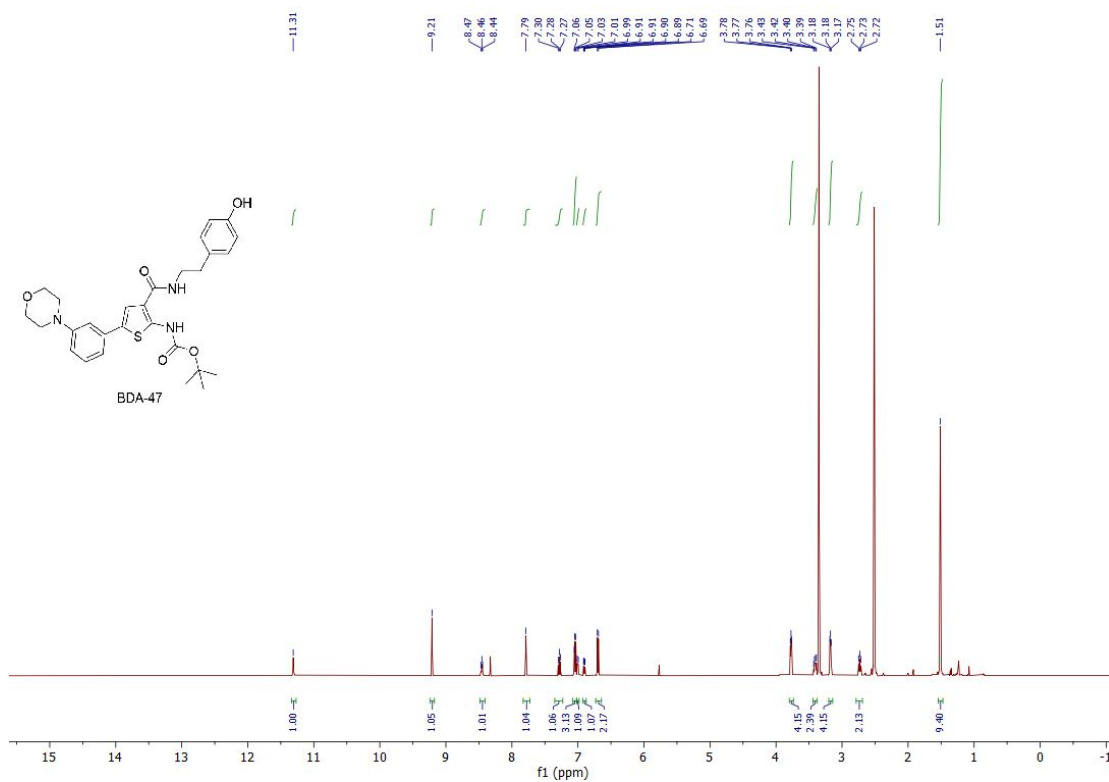

1646

1647  $^{13}\text{C}\{^1\text{H}\}$  NMR spectrum of **BDA-47** (126 MHz,  $\text{DMSO-}d_6$ )

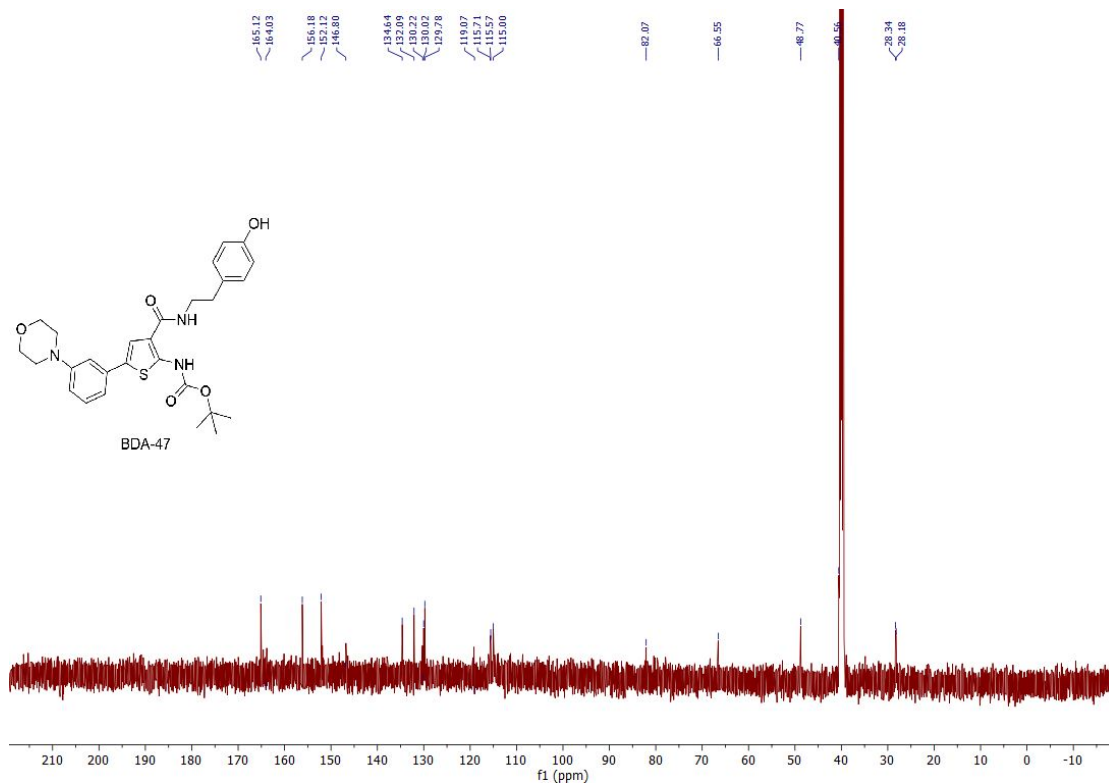

1648

1649  $^1\text{H}$  NMR spectrum of **BDA-48** (500 MHz,  $\text{CDCl}_3$ )

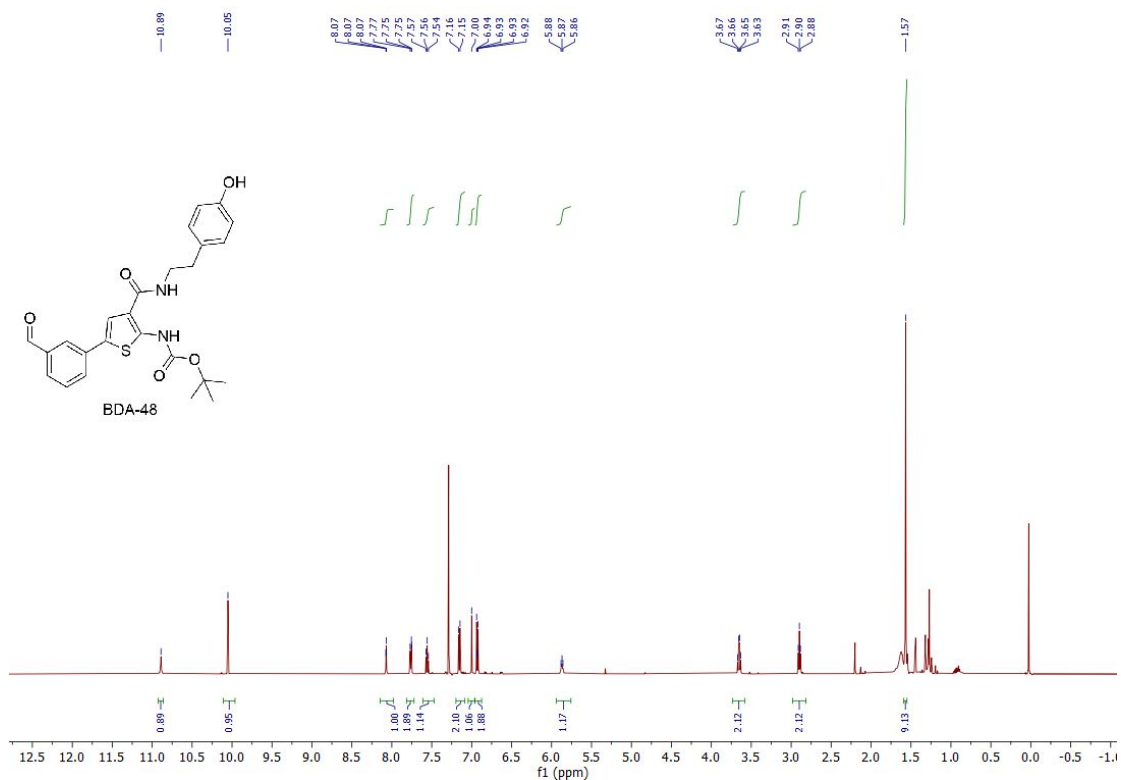

1650

1651  $^{13}\text{C}\{^1\text{H}\}$  NMR spectrum of **BDA-48** (126 MHz,  $\text{CDCl}_3$ )

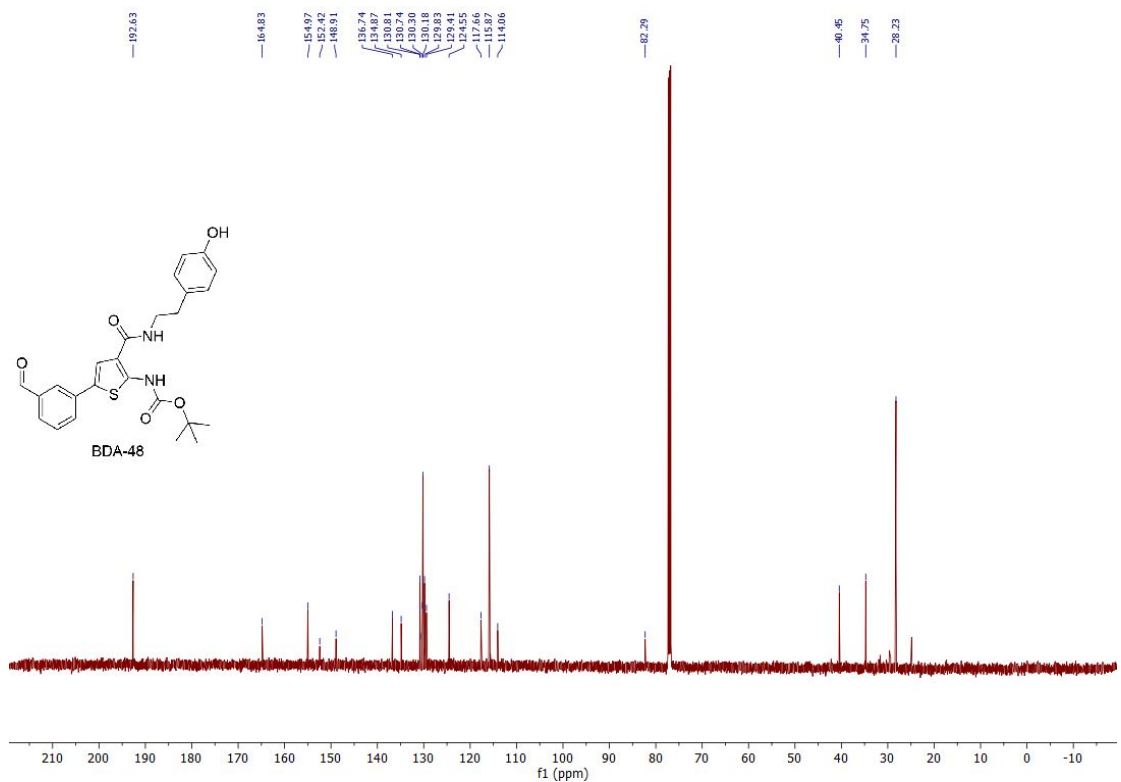

1652



1653  $^1\text{H}$  NMR spectrum of **BDA-49** (500 MHz,  $\text{CDCl}_3$ )

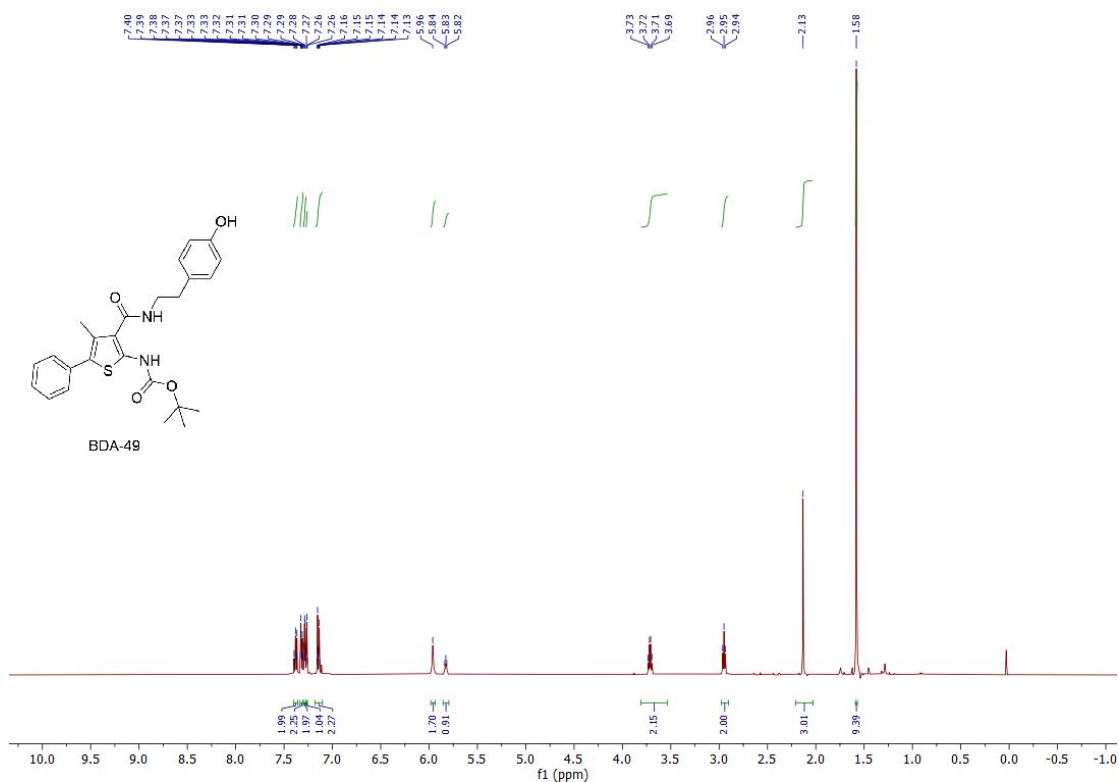

1654

1655  $^{13}\text{C}\{^1\text{H}\}$  NMR spectrum of **BDA-49** (126 MHz,  $\text{CDCl}_3$ )

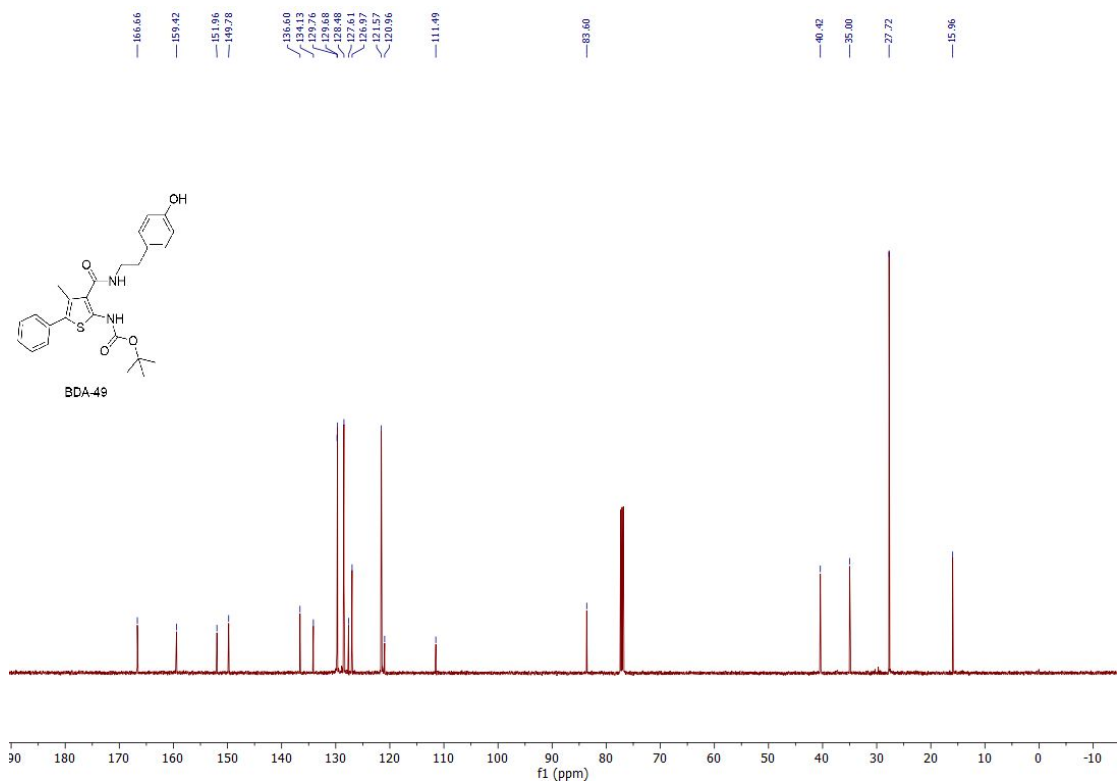

1656

1657  $^1\text{H}$  NMR spectrum of **BDA-50** (500 MHz,  $\text{DMSO-}d_6$ )

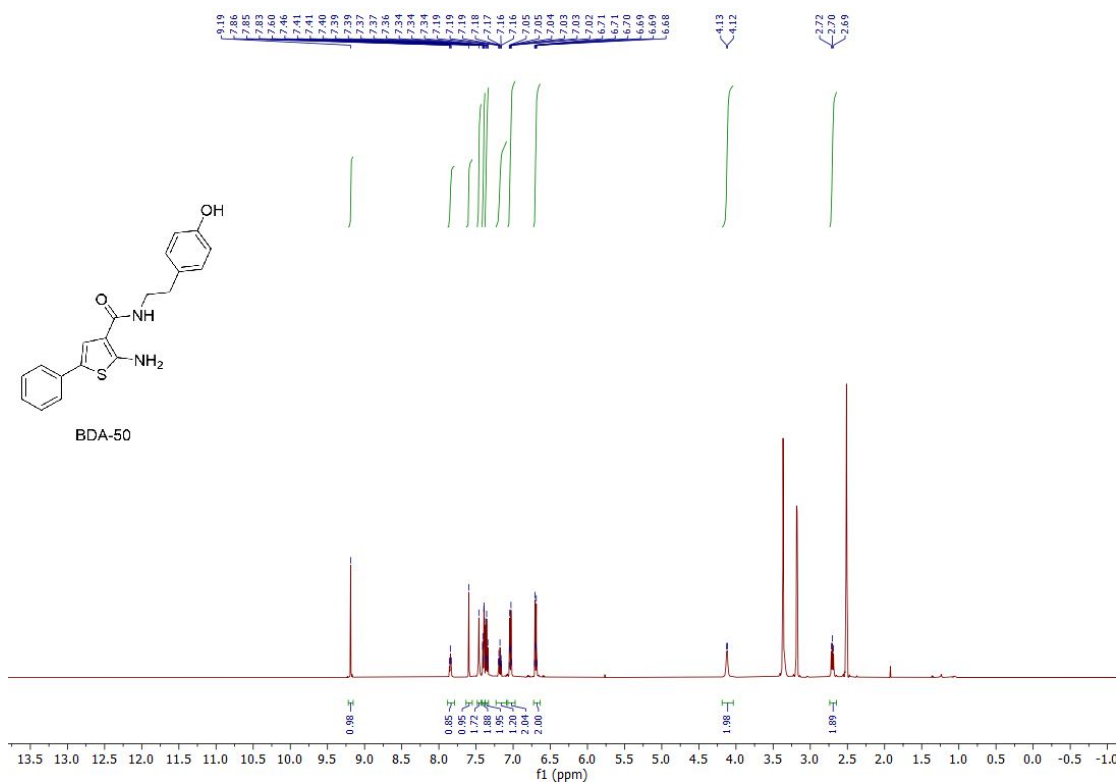

1658

1659  $^{13}\text{C}\{^1\text{H}\}$  NMR spectrum of **BDA-50** (126 MHz,  $\text{DMSO-}d_6$ )

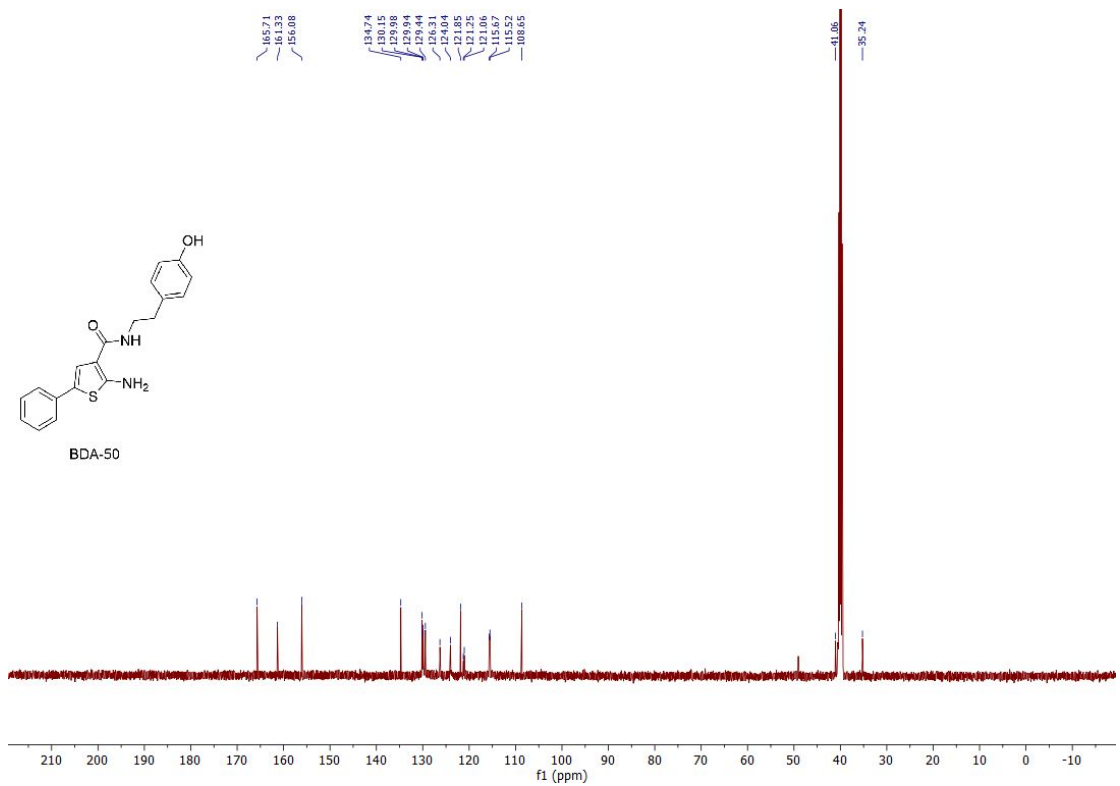

1660

1661  $^1\text{H}$  NMR spectrum of **BDA-51** (500 MHz,  $\text{DMSO-}d_6$ )

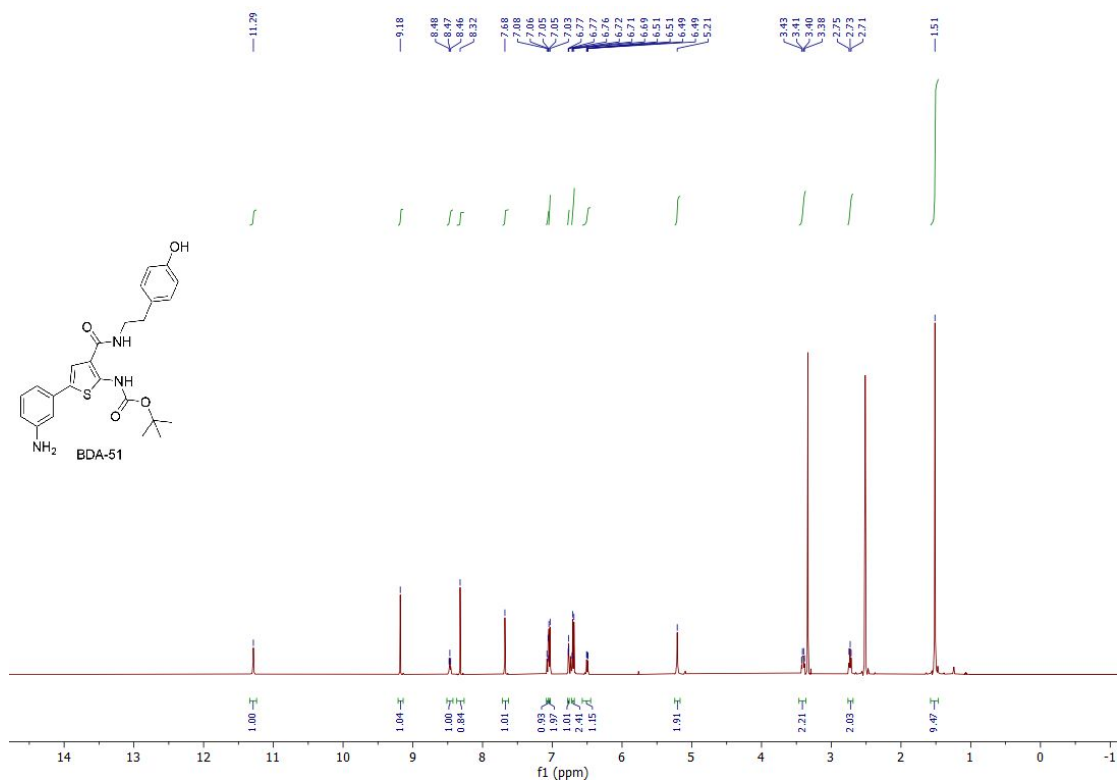

1662  $^{13}\text{C}\{^1\text{H}\}$  NMR spectrum of **BDA-51** (126 MHz,  $\text{DMSO-}d_6$ )

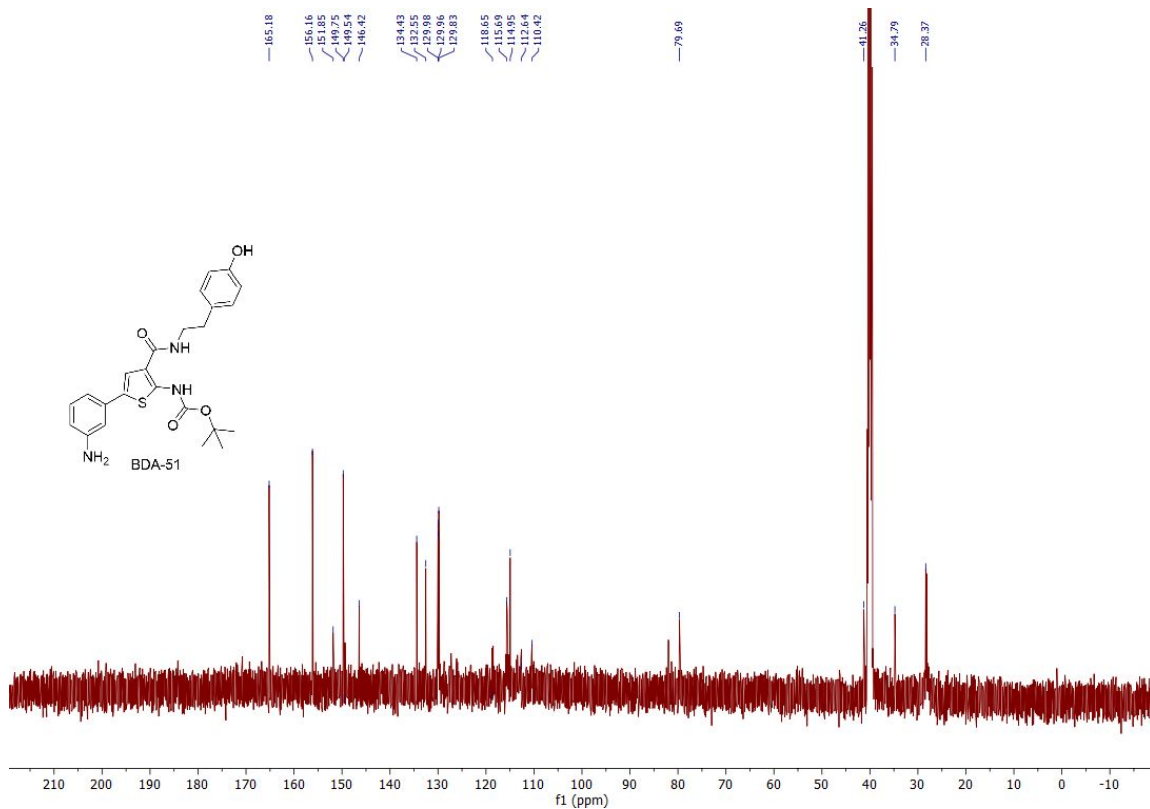

1663

1664  $^1\text{H}$  NMR spectrum of **BDA-52** (500 MHz,  $\text{CDCl}_3$ )

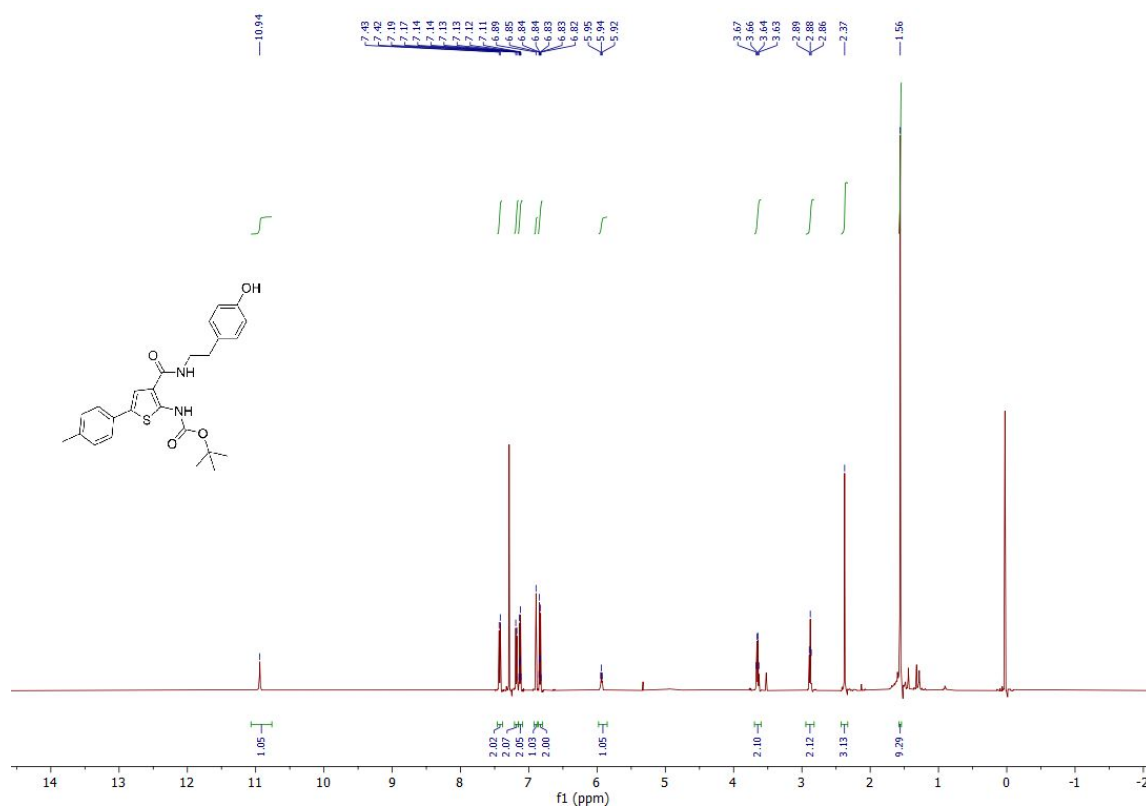

1665

1666  $^{13}\text{C}\{^1\text{H}\}$  NMR spectrum of **BDA-52** (126 MHz,  $\text{CDCl}_3$ )

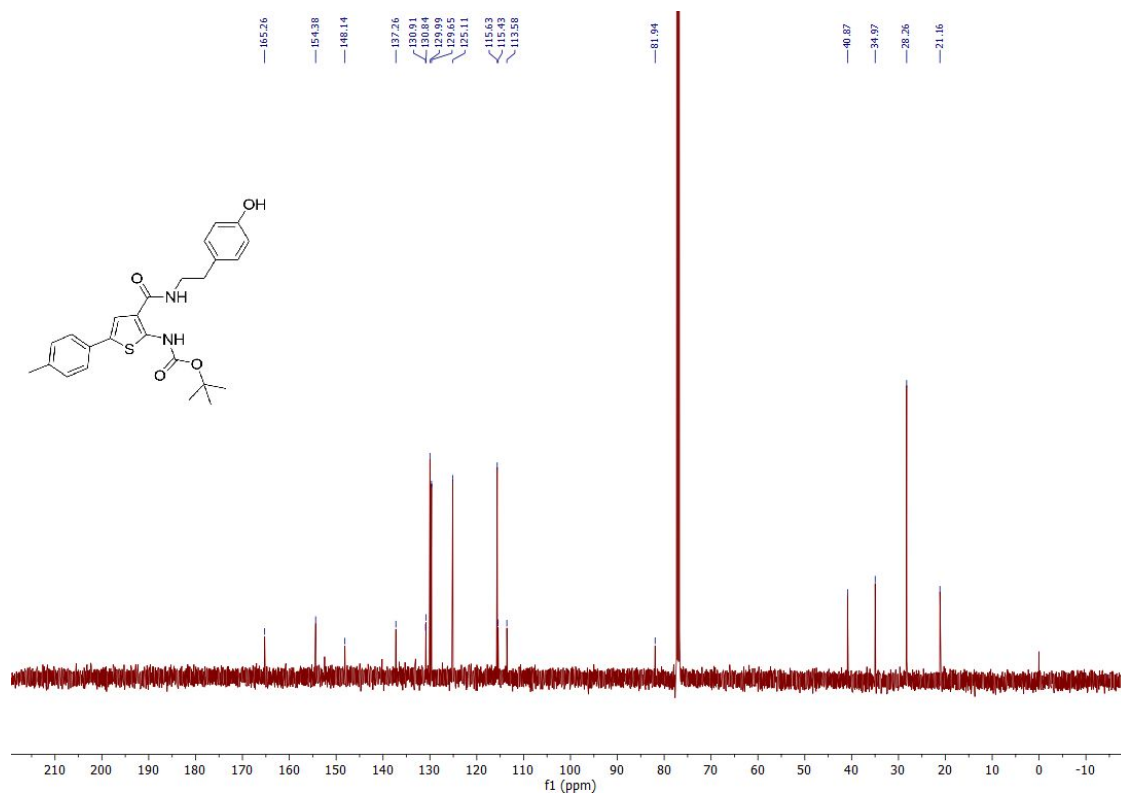

1667

1668  $^1\text{H}$  NMR spectrum of **BDA-53** (500 MHz,  $\text{DMSO-}d_6$ )

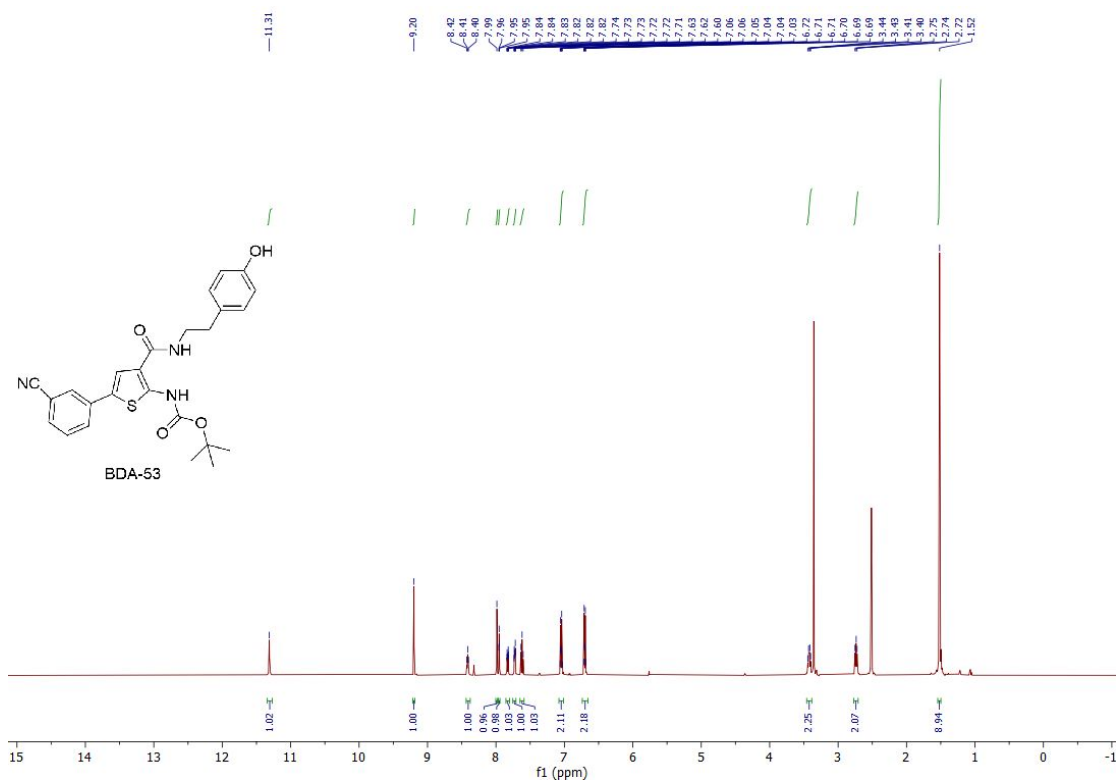

1669

1670  $^{13}\text{C}\{^1\text{H}\}$  NMR spectrum of **BDA-53** (126 MHz,  $\text{DMSO-}d_6$ )

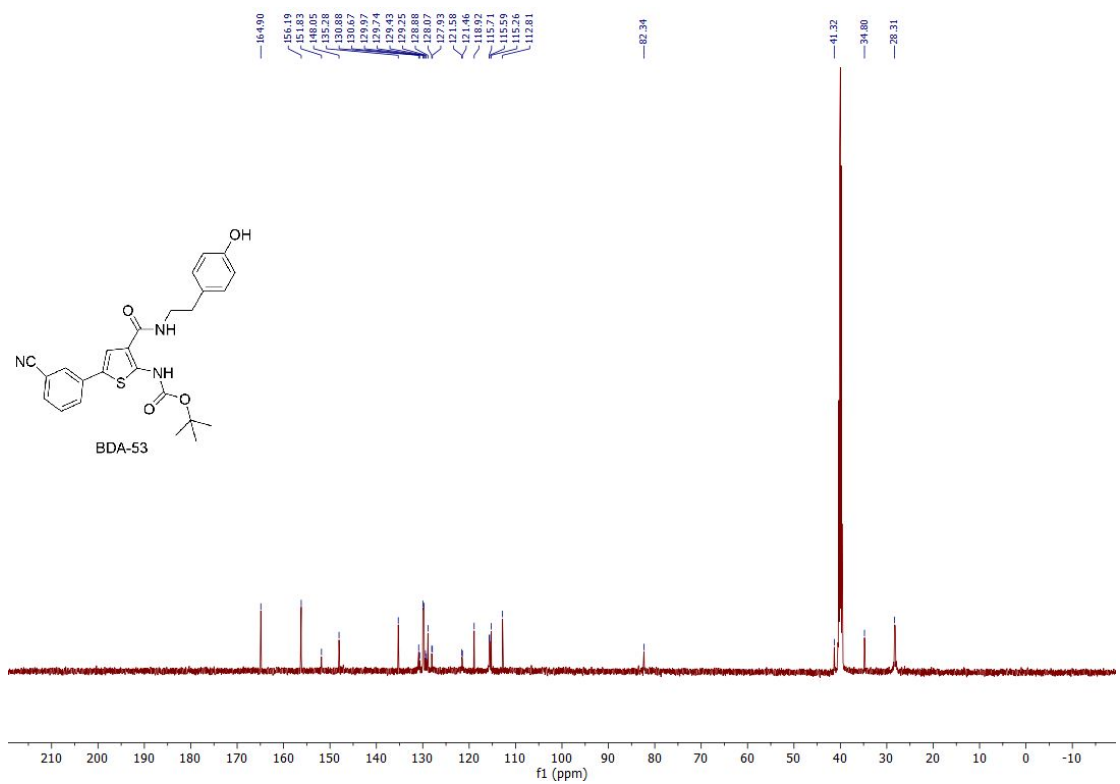

1671

1672  $^1\text{H}$  NMR spectrum of **BDA-54** (500 MHz,  $\text{CDCl}_3$ )

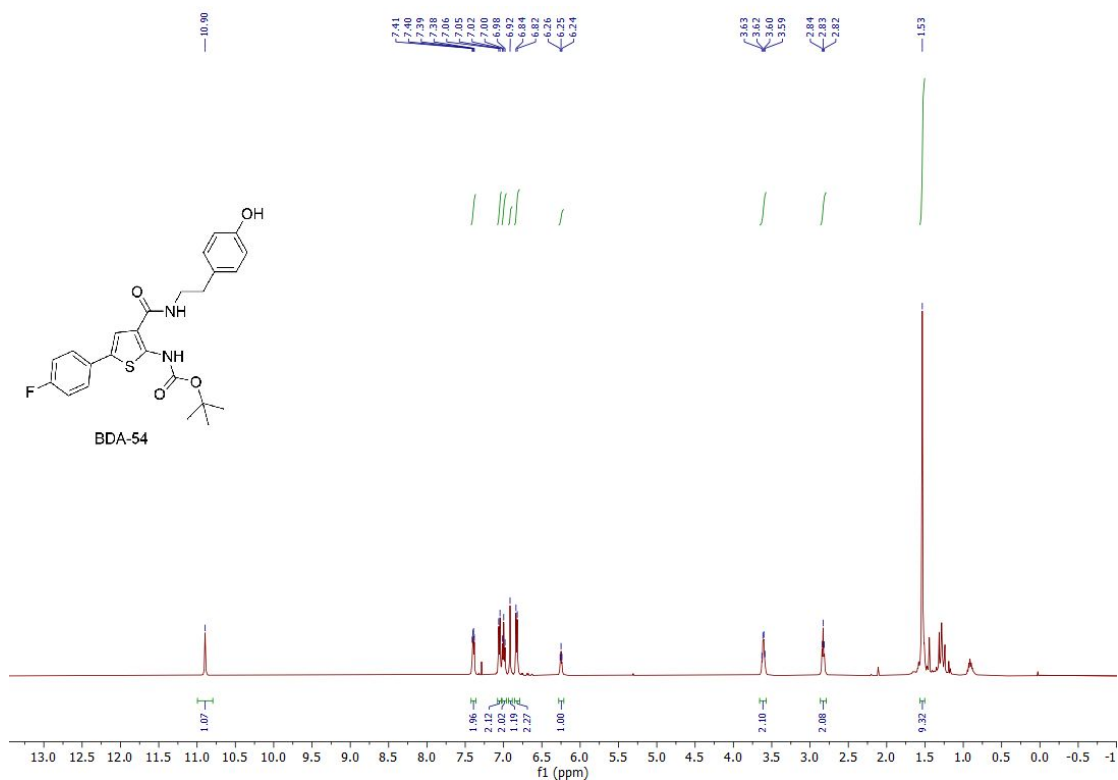

1673

1674  $^{13}\text{C}\{^1\text{H}\}$  NMR spectrum of **BDA-54** (126 MHz,  $\text{CDCl}_3$ )

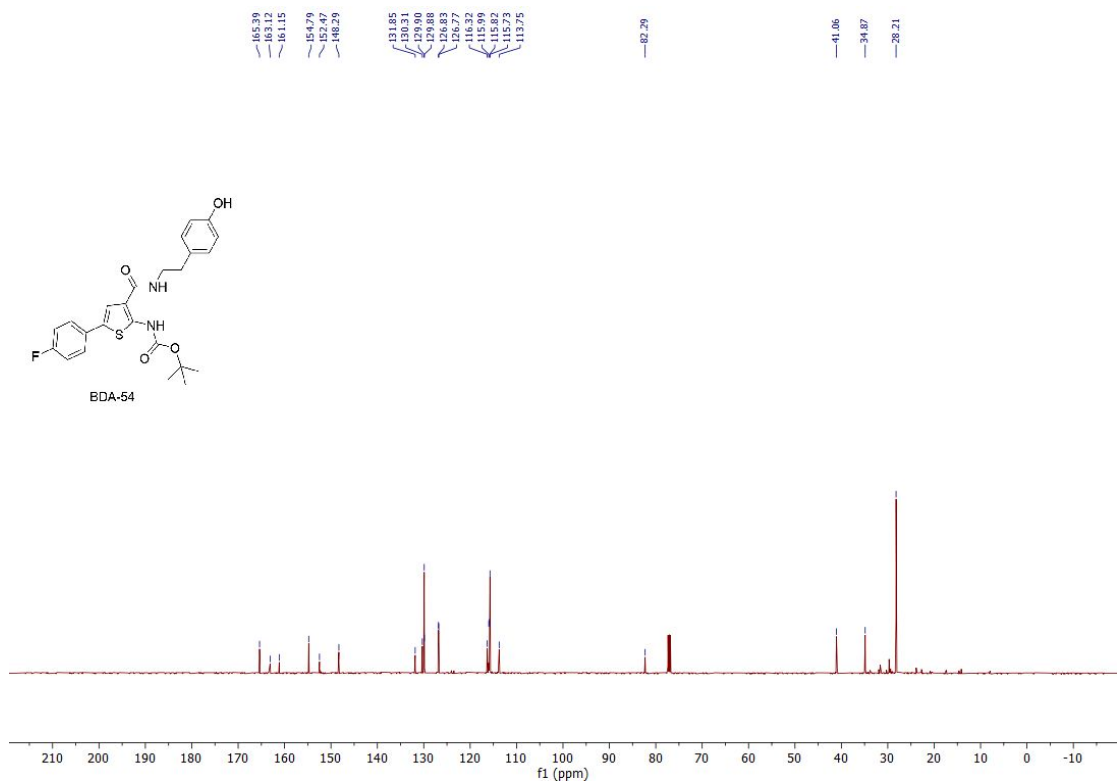

1675

1676  $^1\text{H}$  NMR spectrum of **BDA-55** (500 MHz,  $\text{DMSO-}d_6$ )

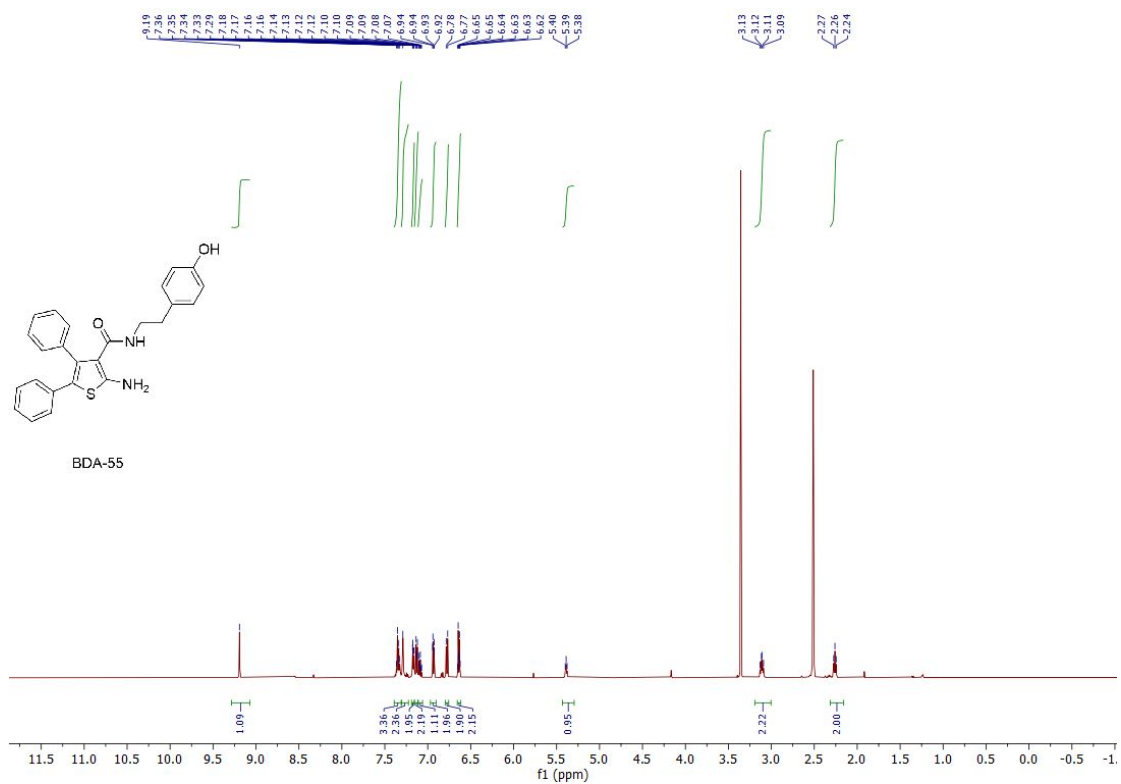

1677

1678  $^{13}\text{C}\{^1\text{H}\}$  NMR spectrum of **BDA-55** (126 MHz,  $\text{DMSO-}d_6$ )

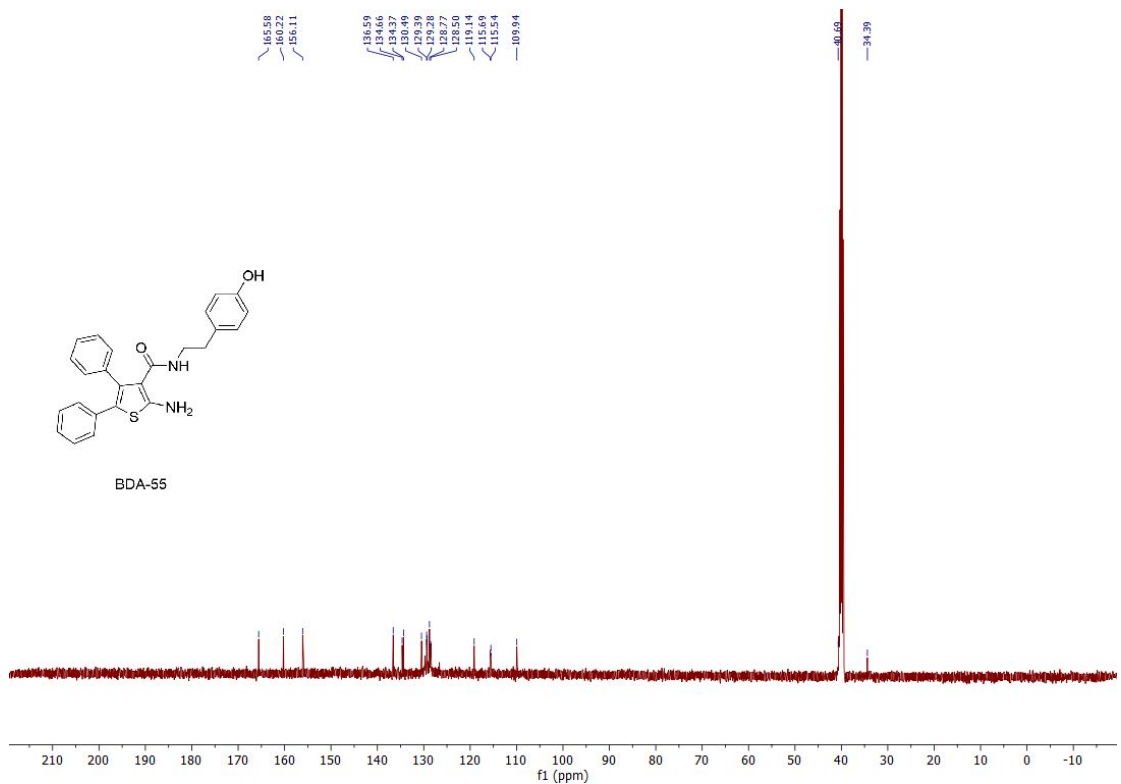

1679

1680  $^1\text{H}$  NMR spectrum of **BDA-56** (500 MHz,  $\text{CDCl}_3$ )

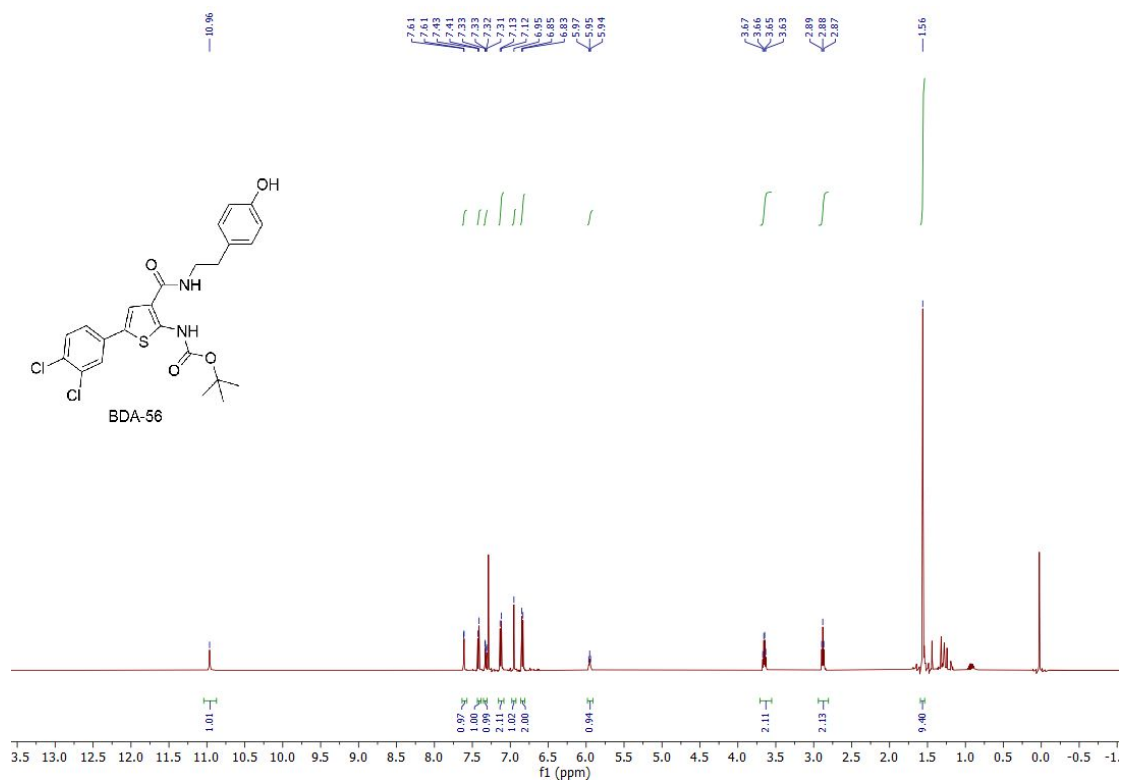

1681

1682  $^{13}\text{C}\{^1\text{H}\}$  NMR spectrum of **BDA-56** (126 MHz,  $\text{CDCl}_3$ )

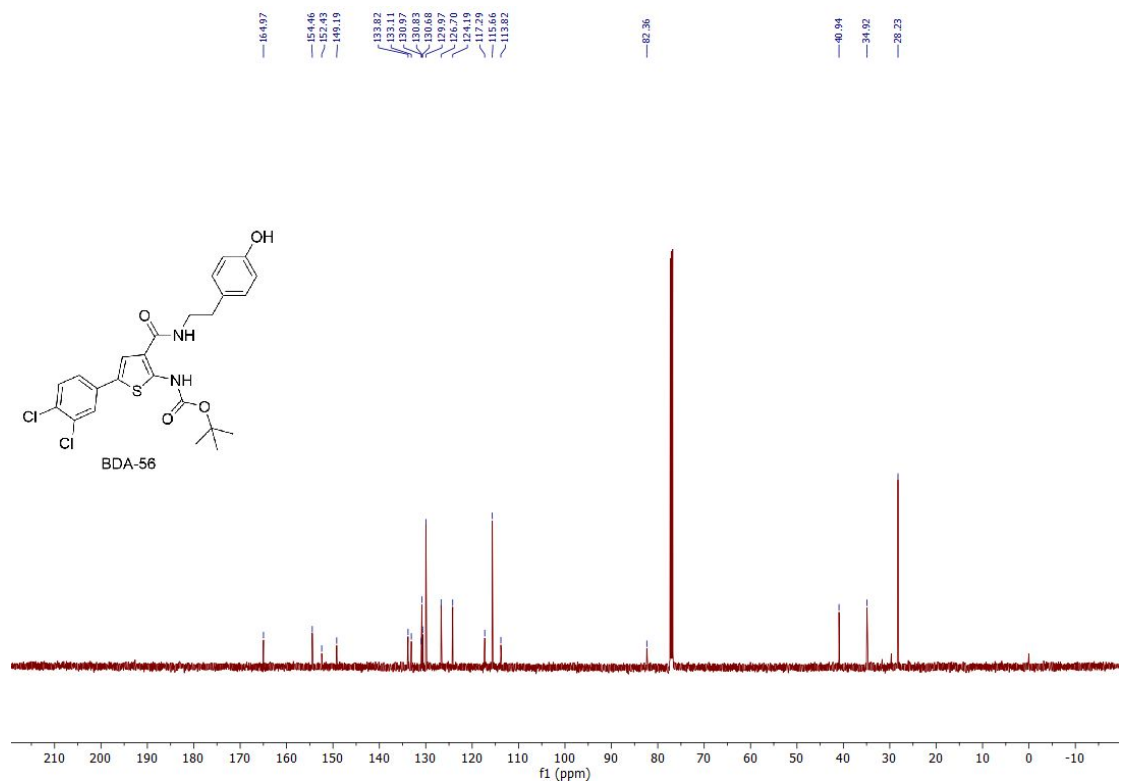

1683



1684  $^1\text{H}$  NMR spectrum of **BDA-57** (500 MHz,  $\text{CDCl}_3$ )

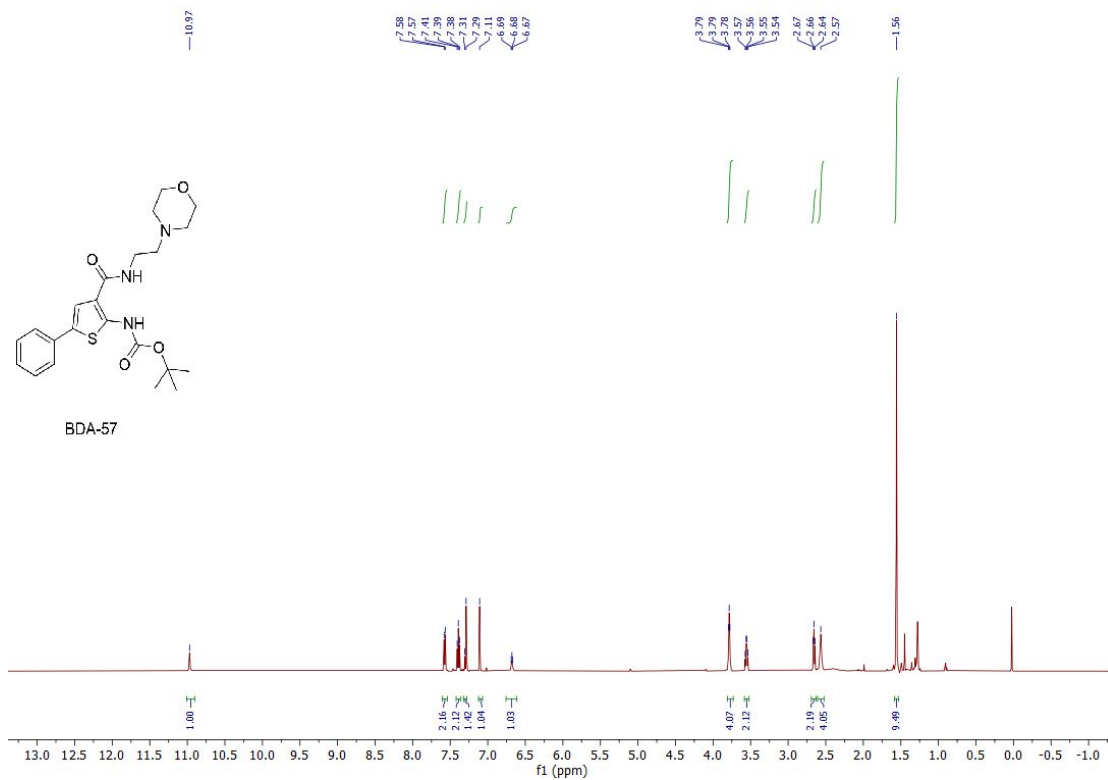

1685

1686  $^{13}\text{C}\{^1\text{H}\}$  NMR spectrum of **BDA-57** (126 MHz,  $\text{CDCl}_3$ )

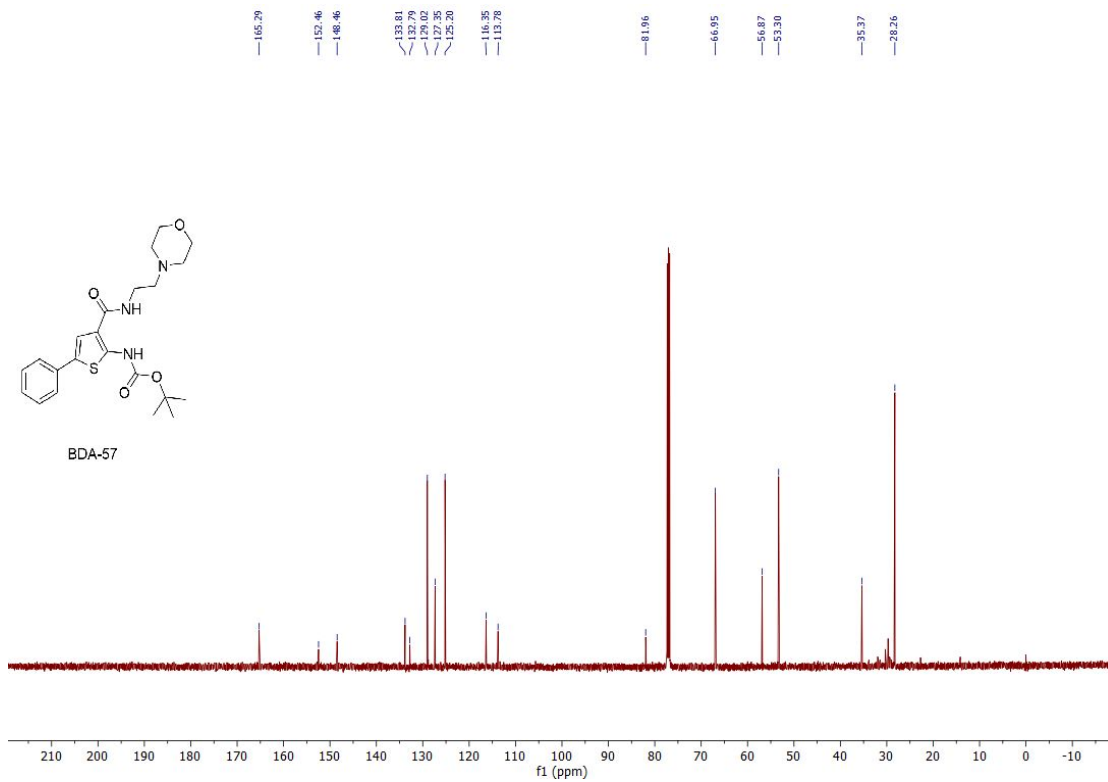

1687

1688  $^1\text{H}$  NMR spectrum of **BDA-58** (500 MHz,  $\text{CDCl}_3$ )

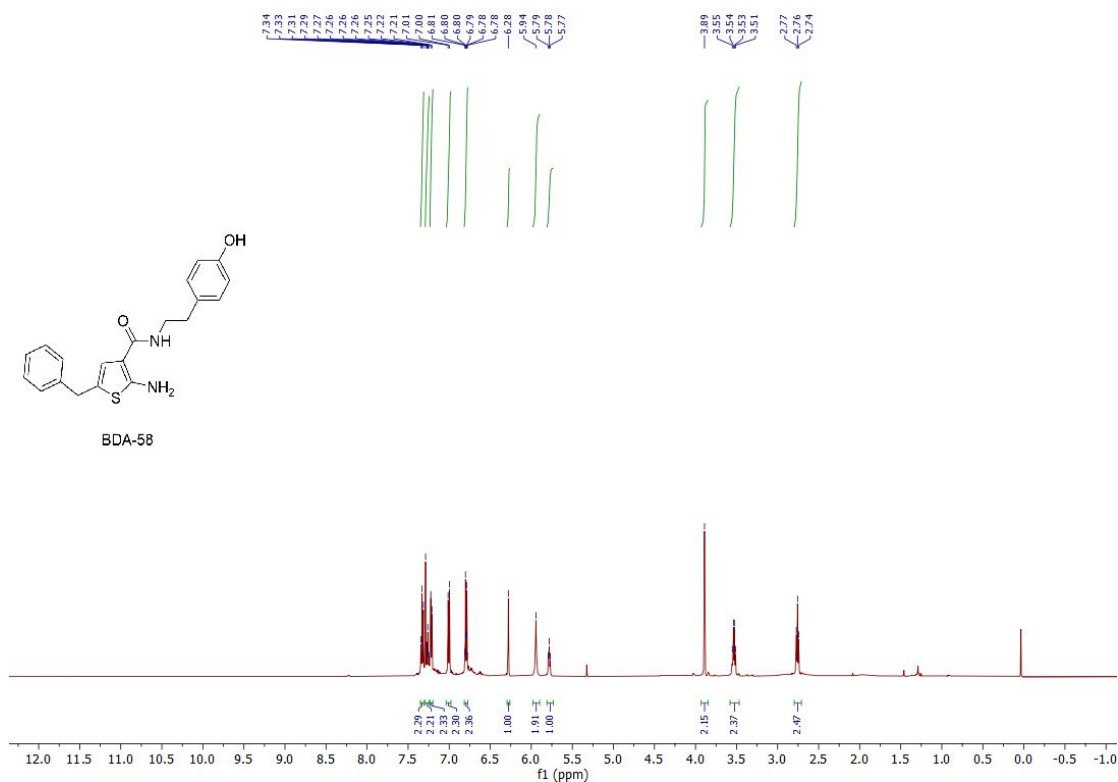

1689

1690  $^{13}\text{C}\{^1\text{H}\}$  NMR spectrum of **BDA-58** (126 MHz,  $\text{CDCl}_3$ )

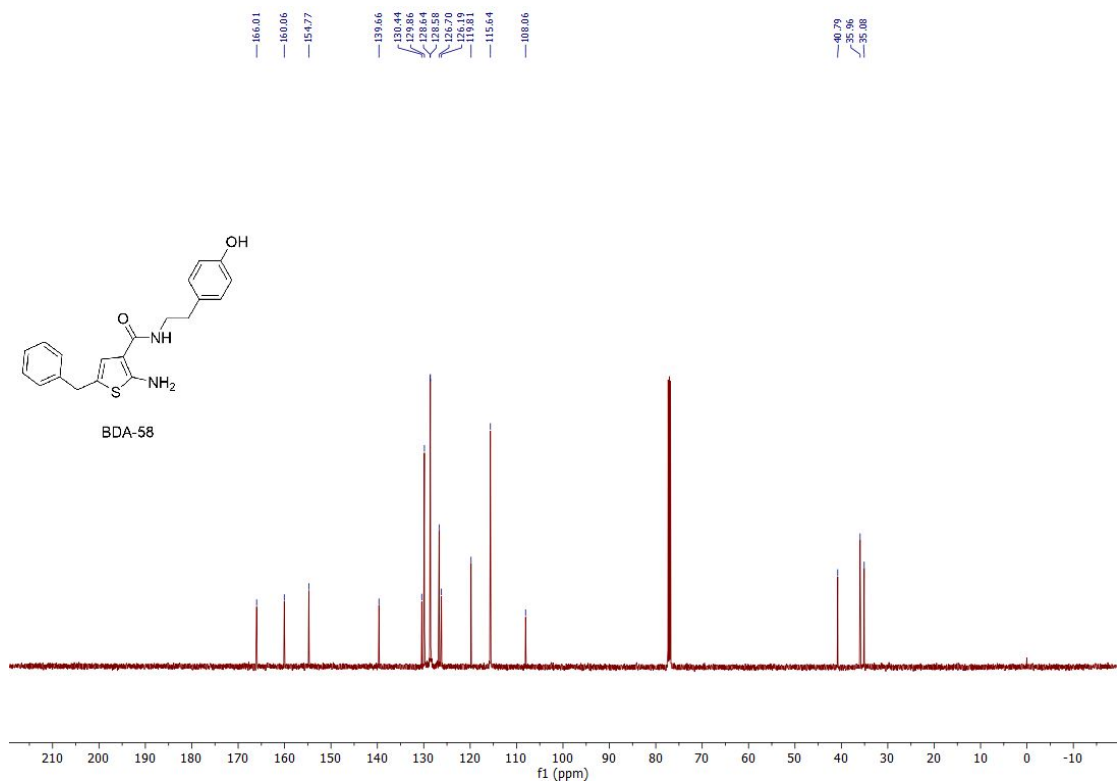

1691

1692  $^1\text{H}$  NMR spectrum of **BDA-59** (500 MHz,  $\text{CDCl}_3$ )

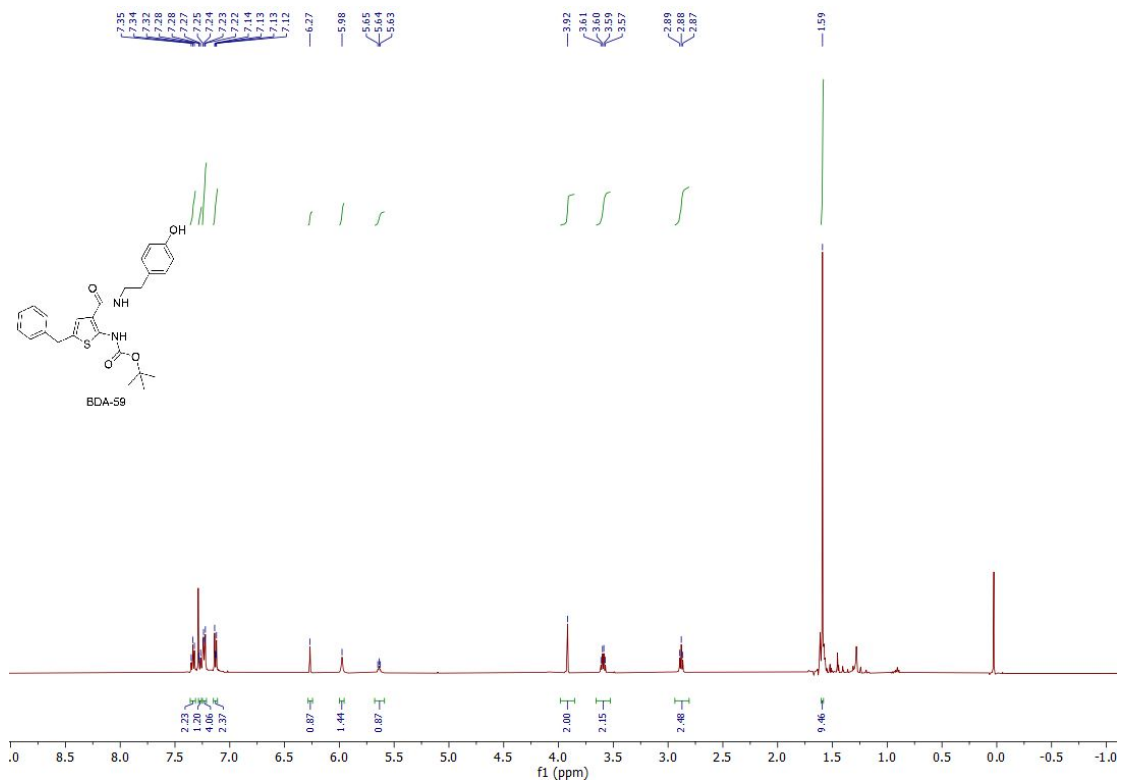

1693

1694  $^{13}\text{C}\{^1\text{H}\}$  NMR spectrum of **BDA-59** (126 MHz,  $\text{CDCl}_3$ )

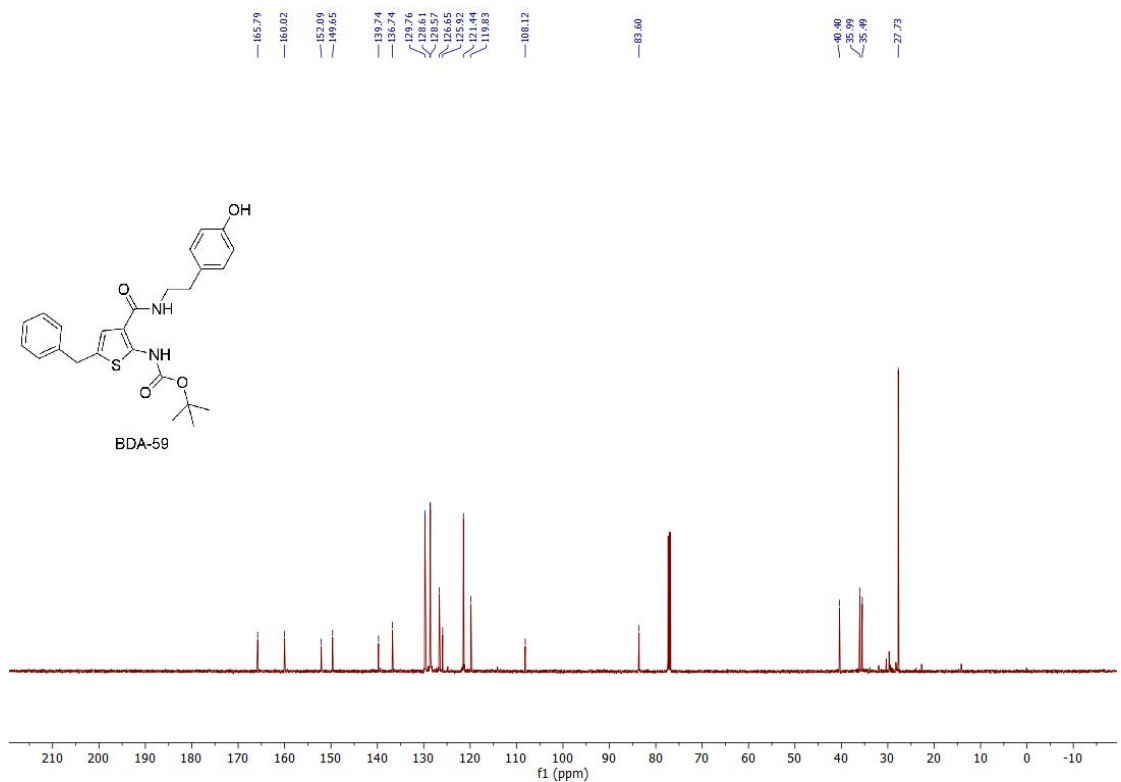

1695

1696  $^1\text{H}$  NMR spectrum of **BDA-60** (500 MHz,  $\text{CDCl}_3$ )

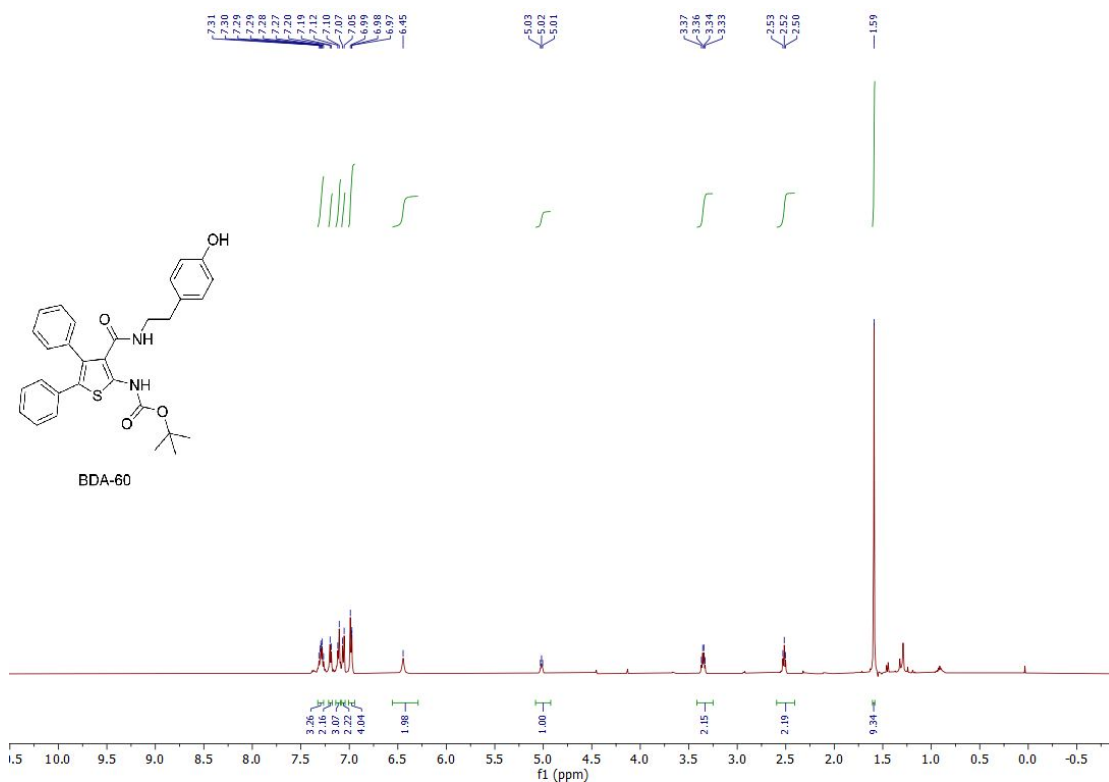

1697

1698  $^{13}\text{C}\{^1\text{H}\}$  NMR spectrum of **BDA-60** (126 MHz,  $\text{CDCl}_3$ )

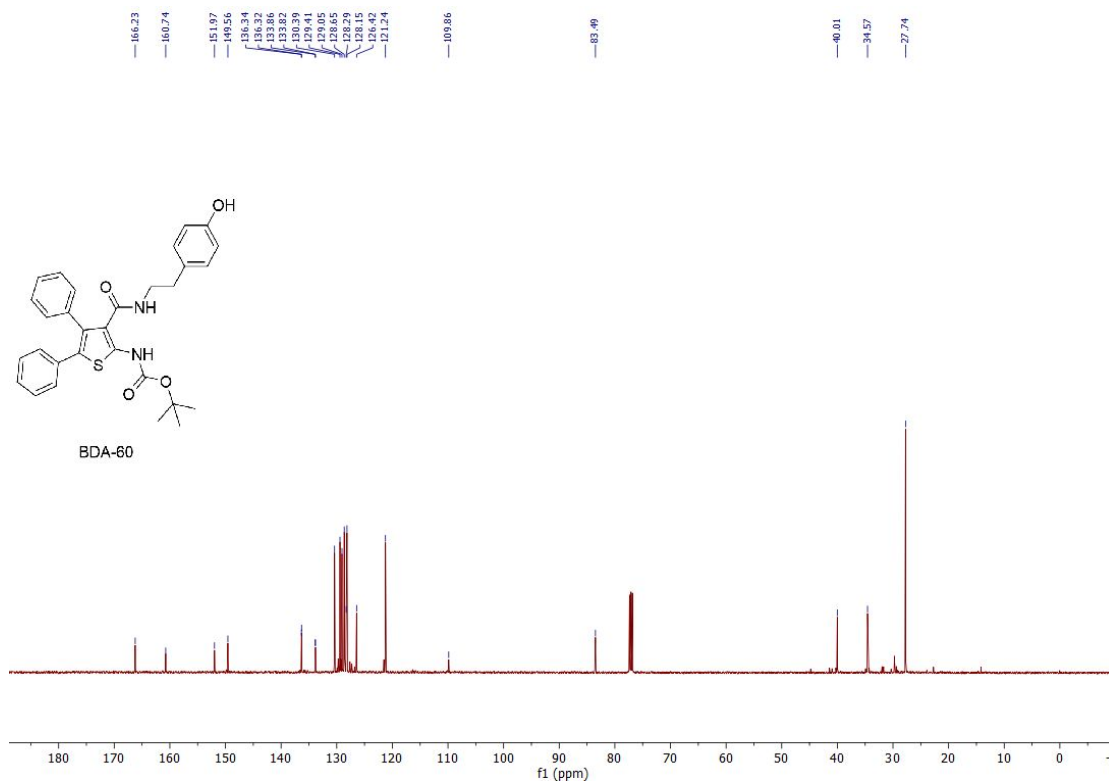

1699

1700  $^1\text{H}$  NMR spectrum of **BDA-61** (500 MHz,  $\text{DMSO-}d_6$ )

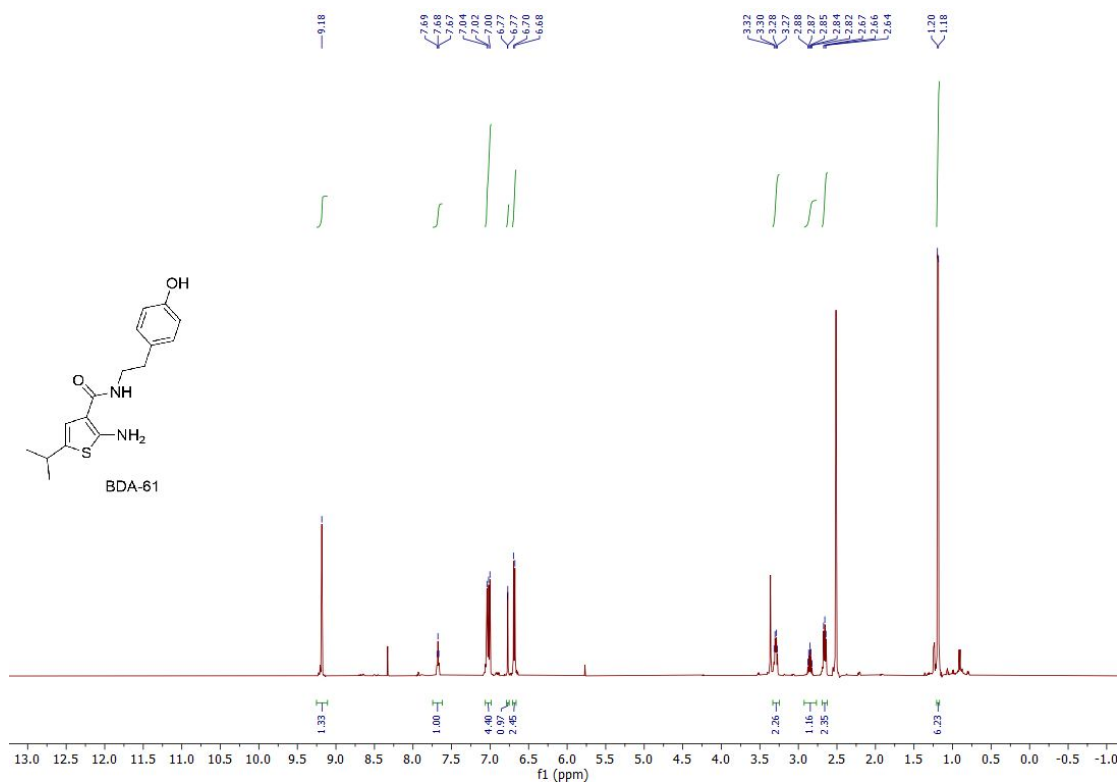

1701

1702  $^{13}\text{C}\{^1\text{H}\}$  NMR spectrum of **BDA-61** (126 MHz,  $\text{DMSO-}d_6$ )

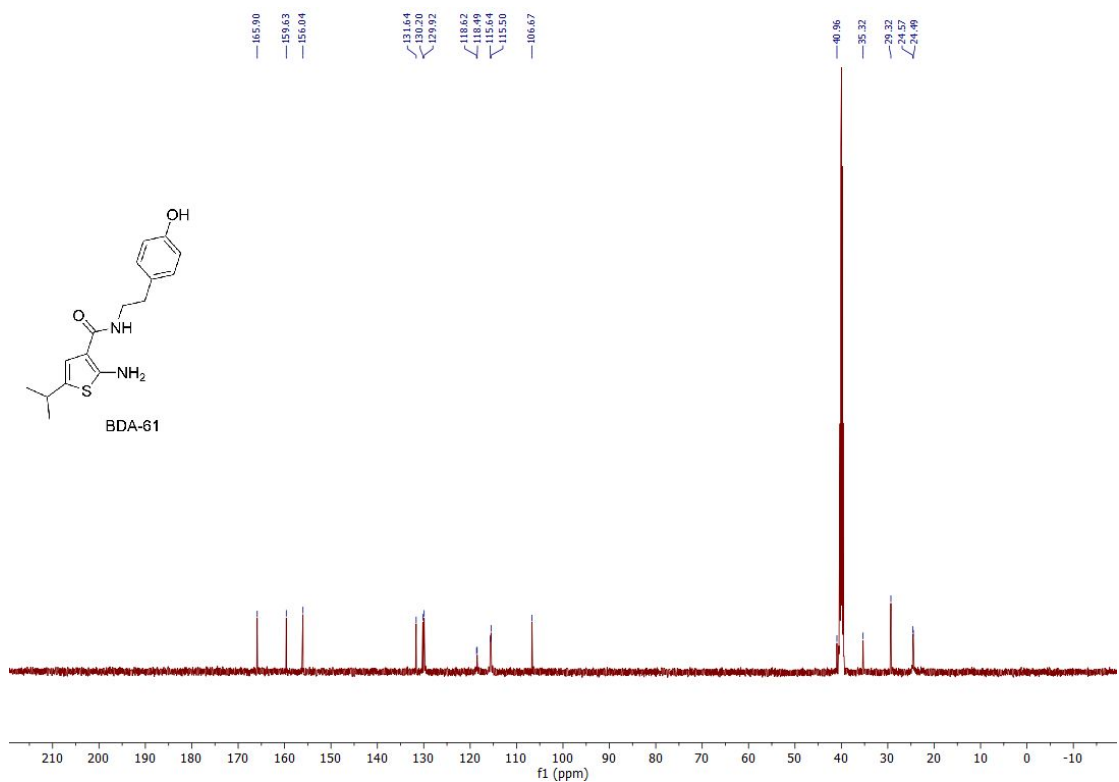

1703

1704  $^1\text{H}$  NMR spectrum of **BDA-62** (500 MHz,  $\text{CDCl}_3$ )

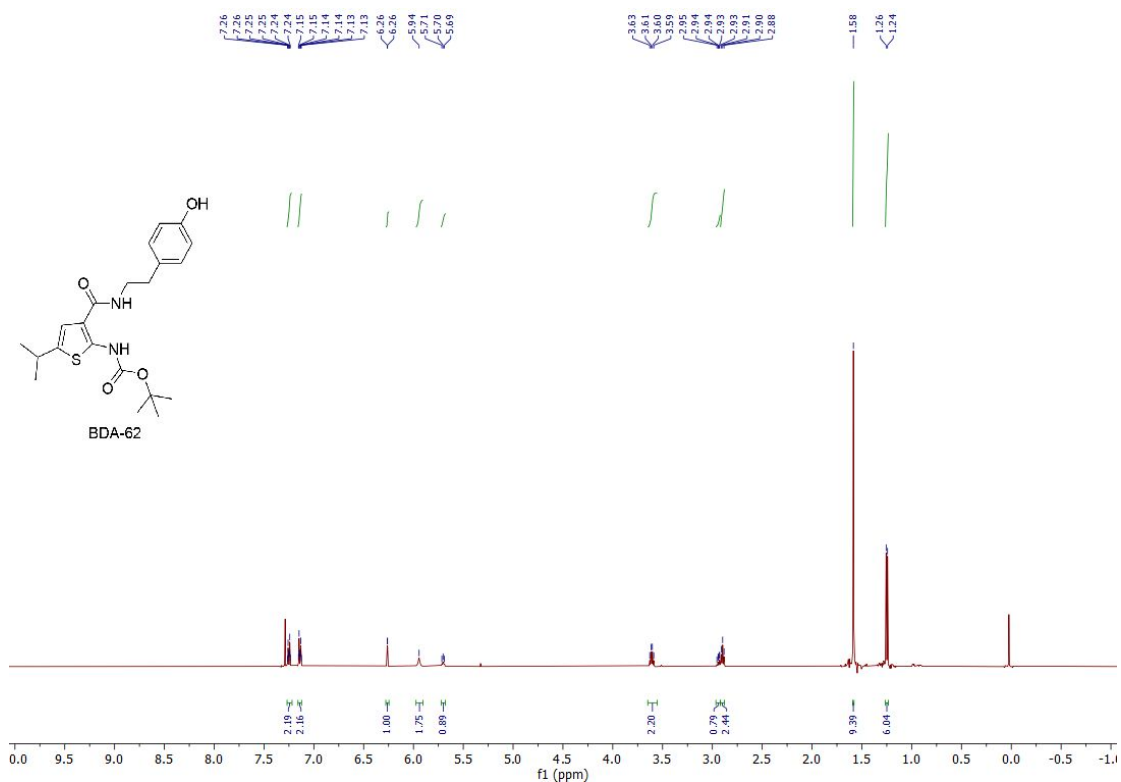

1705

1706  $^{13}\text{C}\{^1\text{H}\}$  NMR spectrum of **BDA-62** (126 MHz,  $\text{CDCl}_3$ )

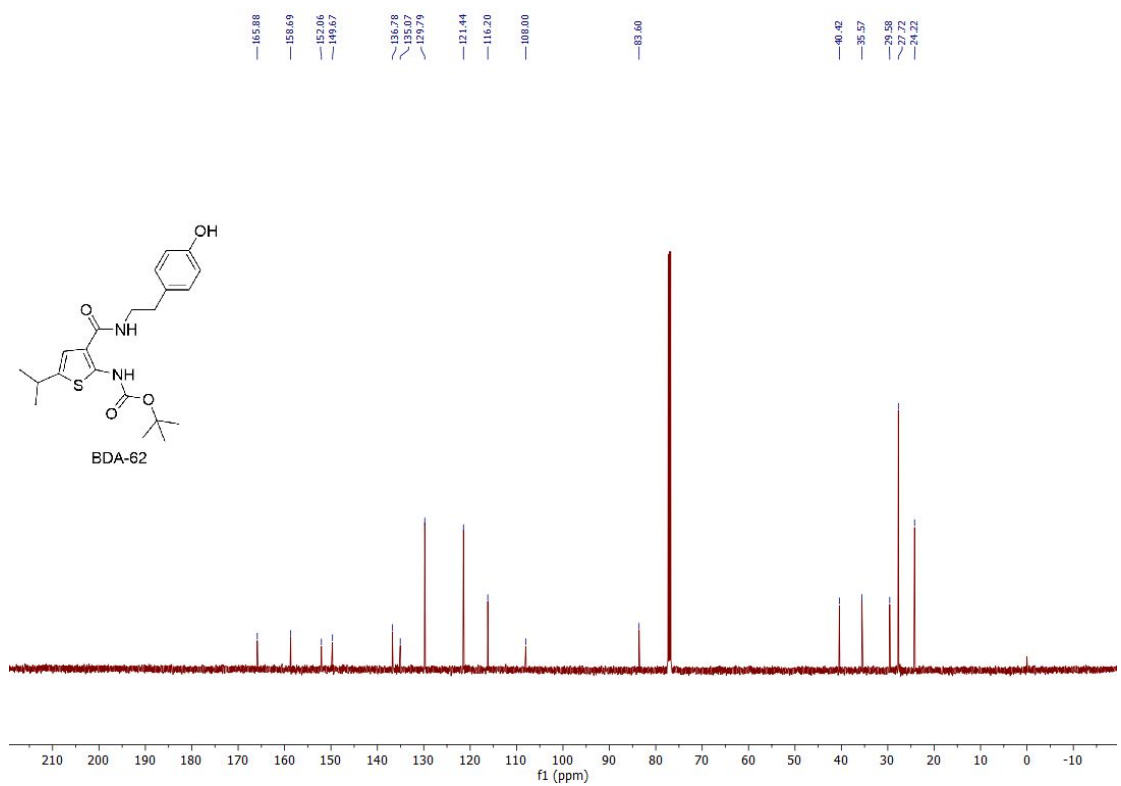

1707

1708  $^1\text{H}$  NMR spectrum of **BDA-63** (500 MHz,  $\text{DMSO-}d_6$ )

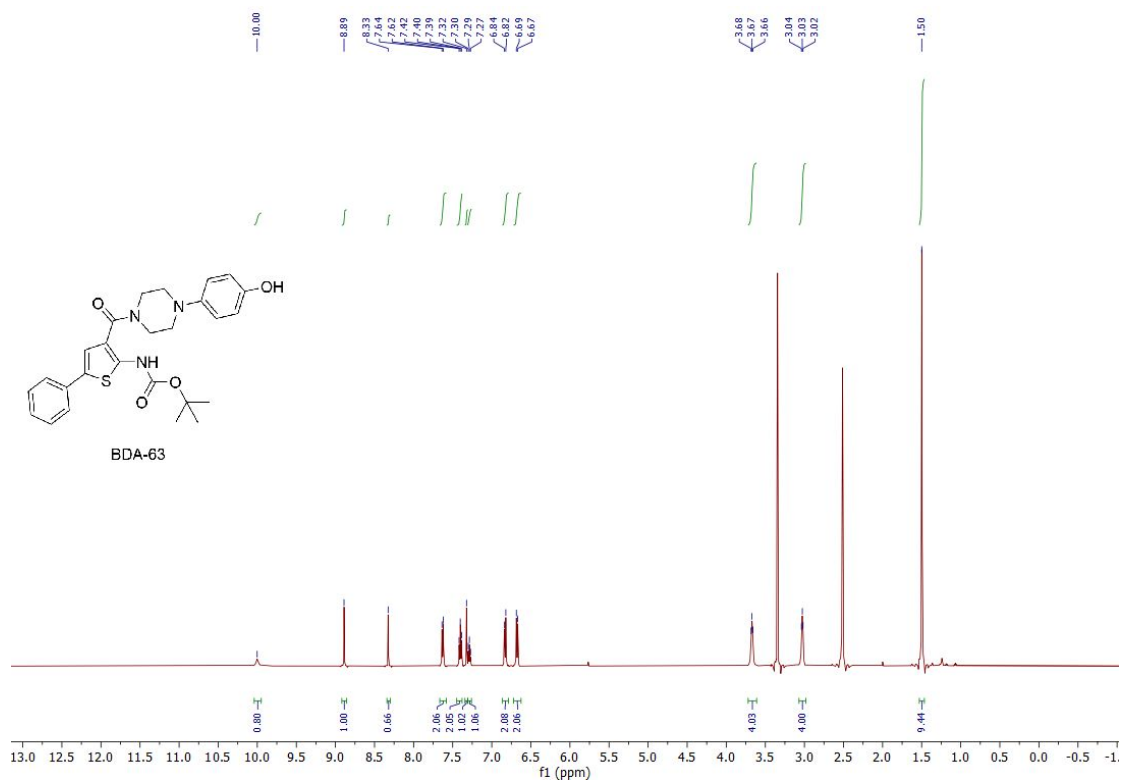

1709

1710  $^{13}\text{C}\{^1\text{H}\}$  NMR spectrum of **BDA-63** (126 MHz,  $\text{DMSO-}d_6$ )

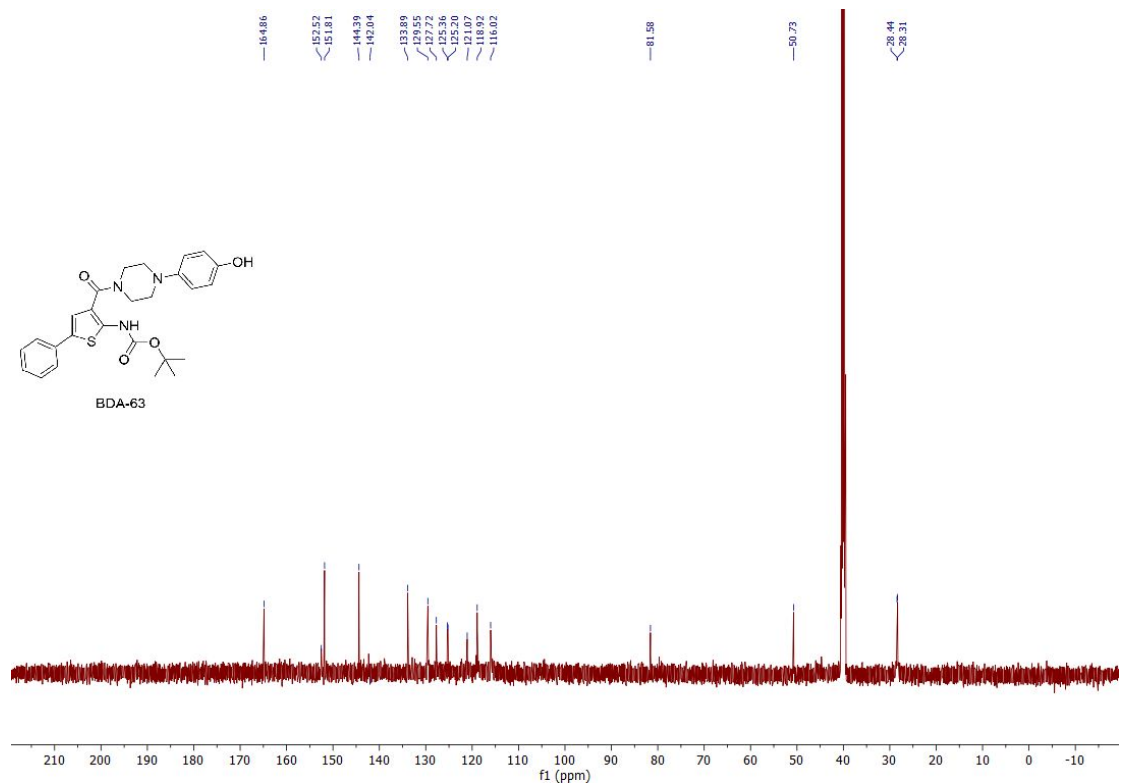

1711

1712  $^1\text{H}$  NMR spectrum of **BDA-64** (500 MHz,  $\text{CDCl}_3$ )

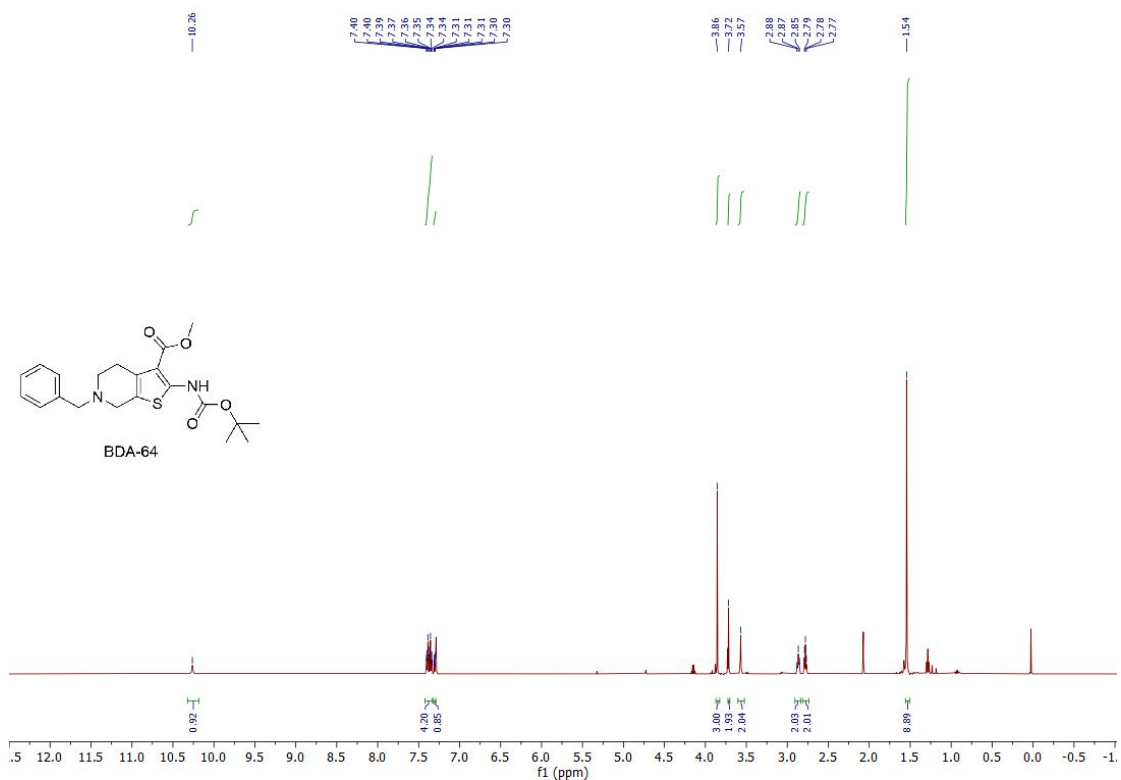

1713

1714  $^{13}\text{C}\{^1\text{H}\}$  NMR spectrum of **BDA-64** (126 MHz,  $\text{CDCl}_3$ )

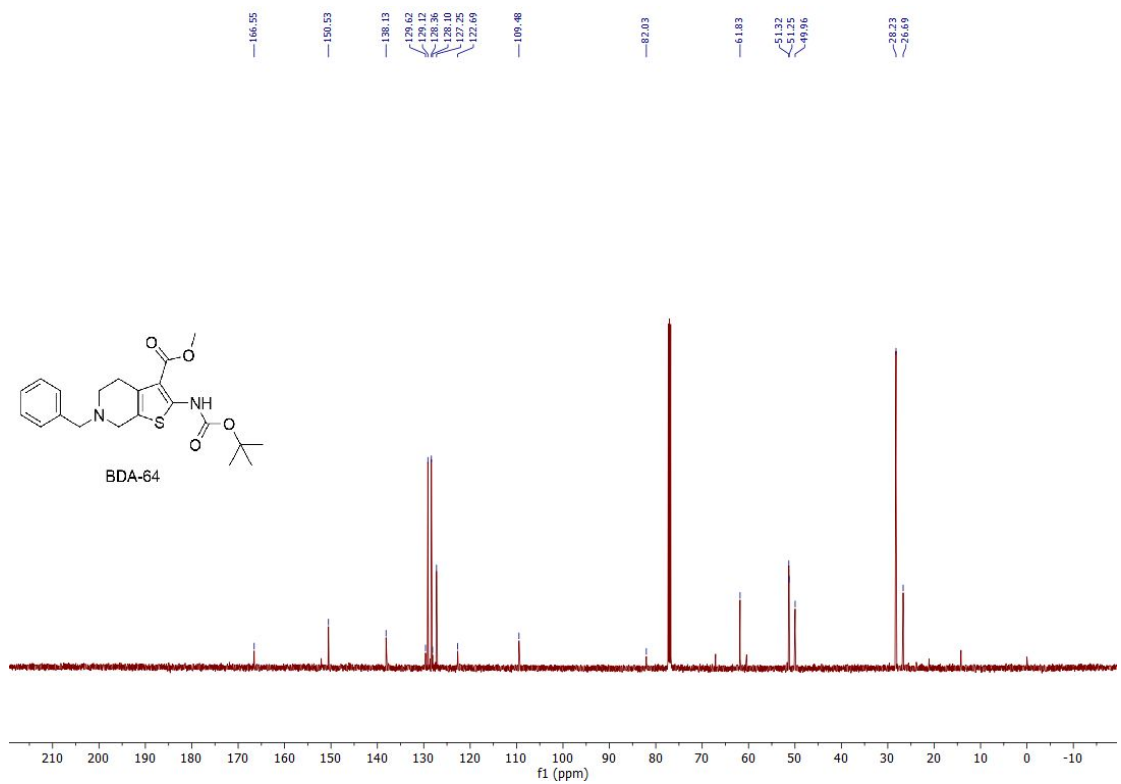

1715



1716  $^1\text{H}$  NMR spectrum of **BDA-65** (500 MHz,  $\text{CDCl}_3$ )

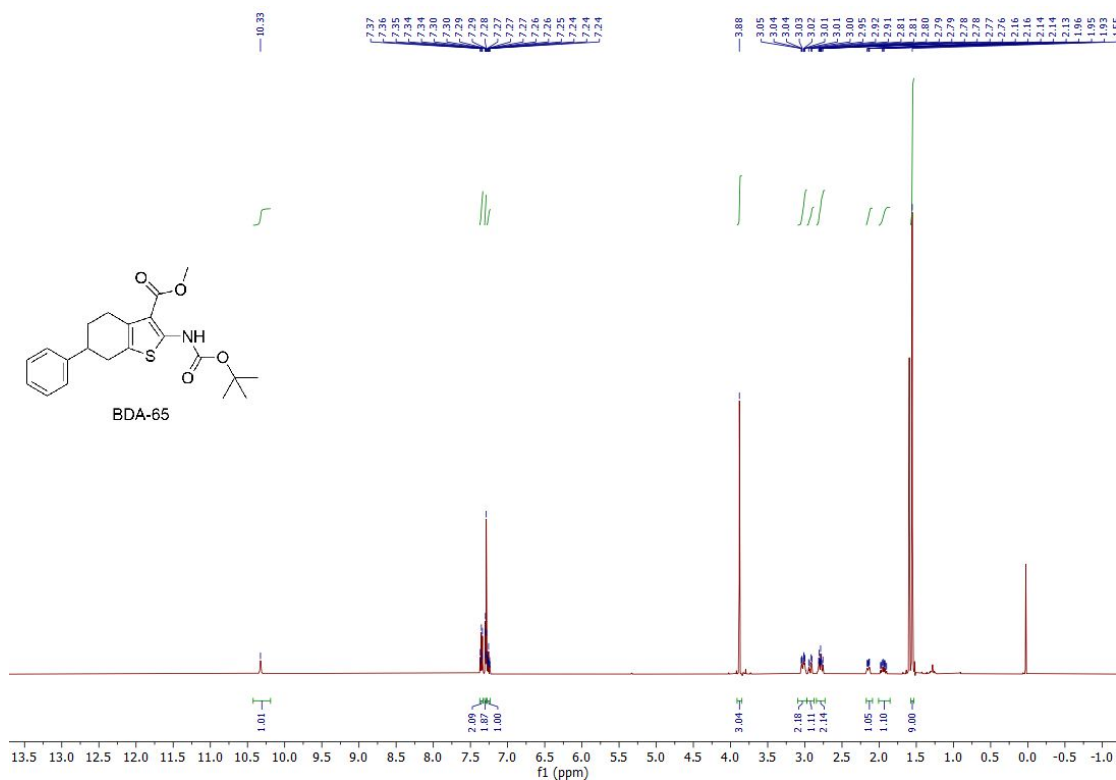

1717

1718  $^{13}\text{C}\{^1\text{H}\}$  NMR spectrum of **BDA-65** (126 MHz,  $\text{CDCl}_3$ )

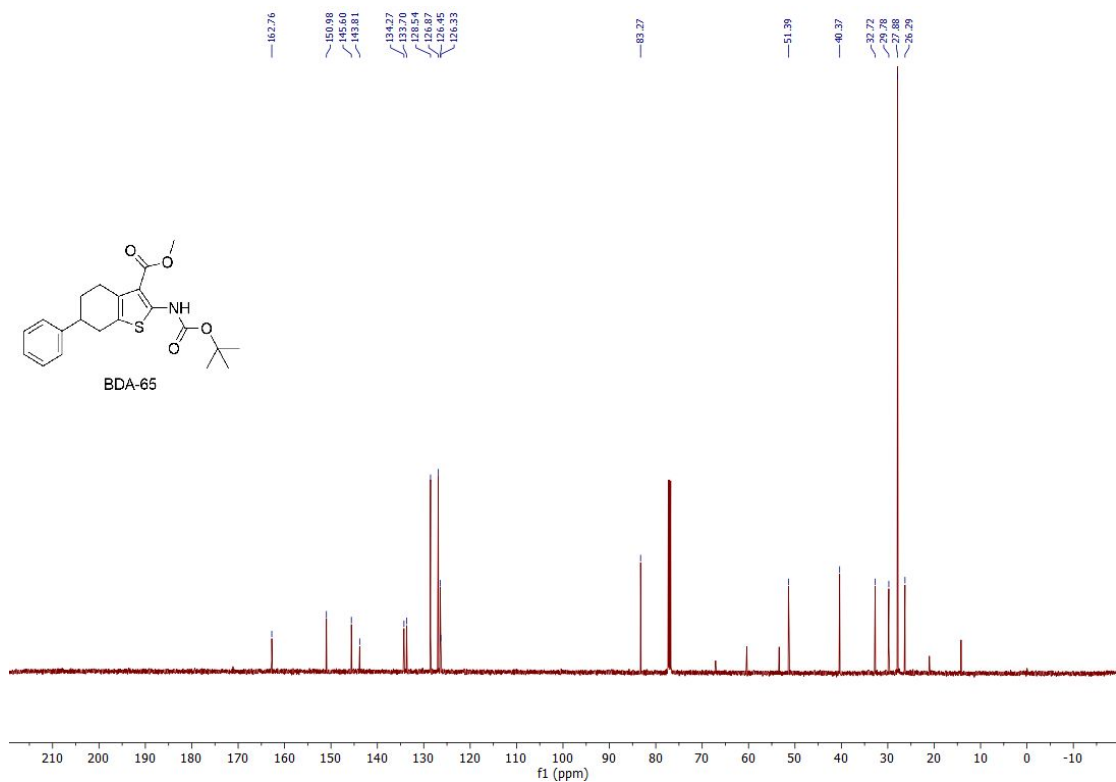

1719

1720  $^1\text{H}$  NMR spectrum of **BDA-66** (500 MHz,  $\text{CDCl}_3$ )

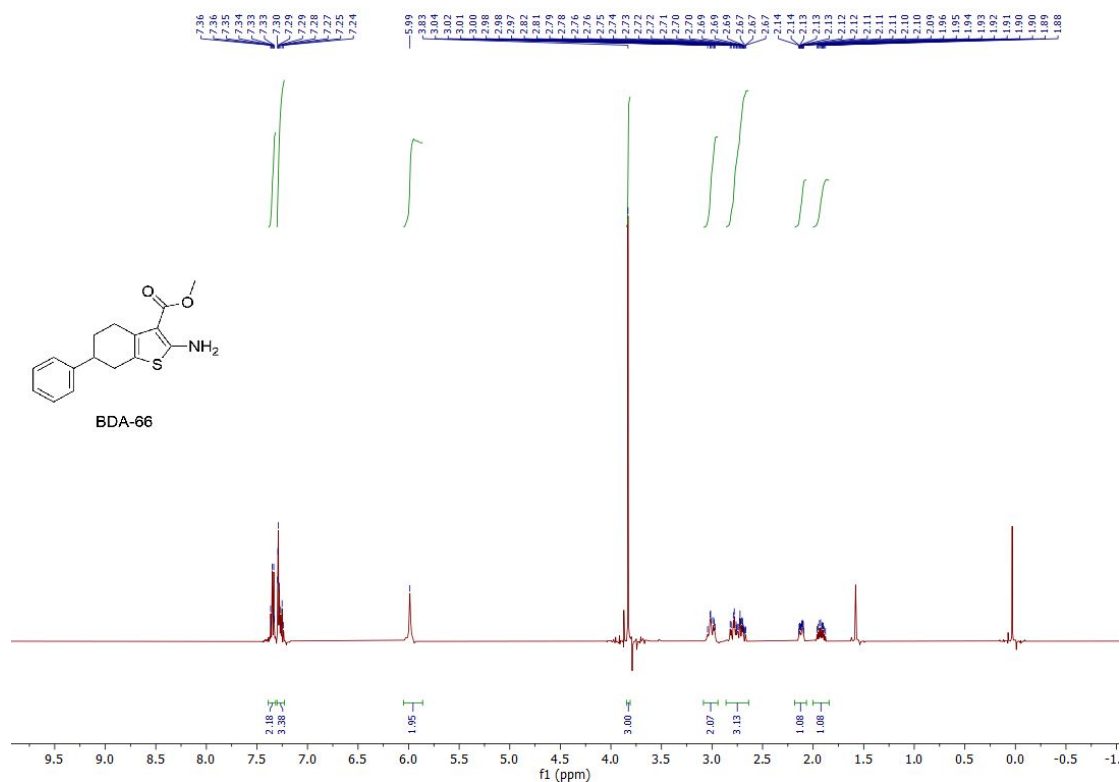

1721

1722  $^{13}\text{C}\{^1\text{H}\}$  NMR spectrum of **BDA-66** (126 MHz,  $\text{CDCl}_3$ )

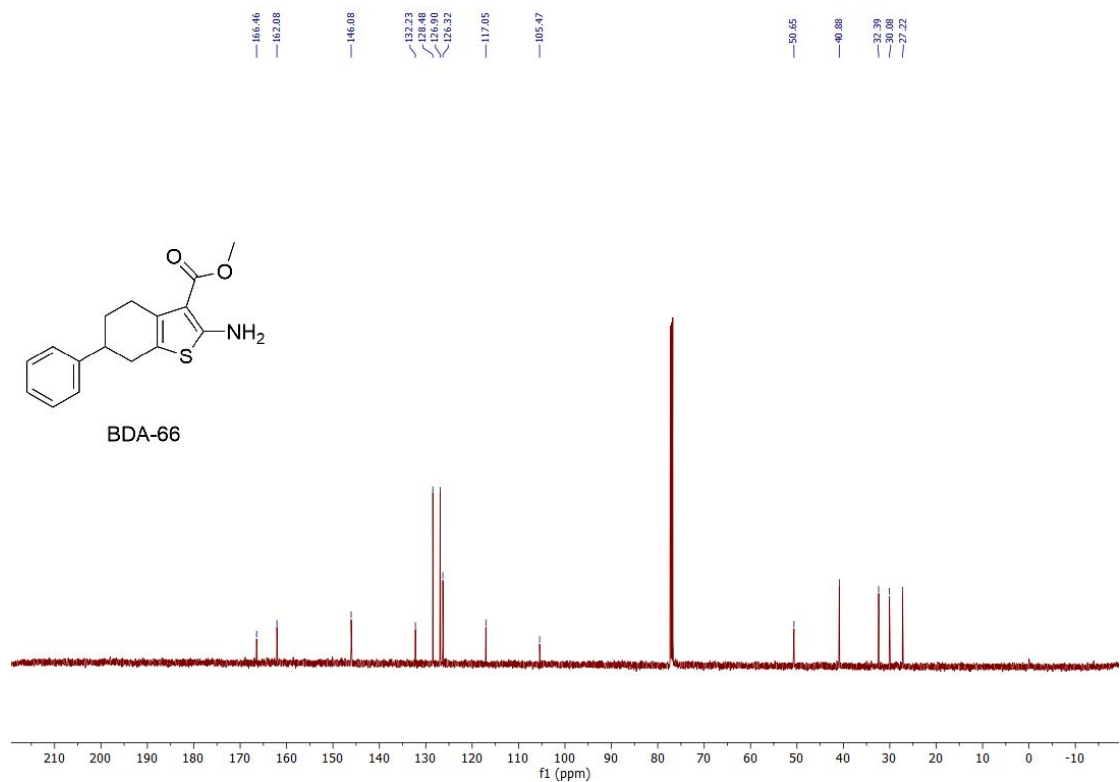

1723

1724  $^1\text{H}$  NMR spectrum of **BDA-67** (500 MHz,  $\text{CDCl}_3$ )

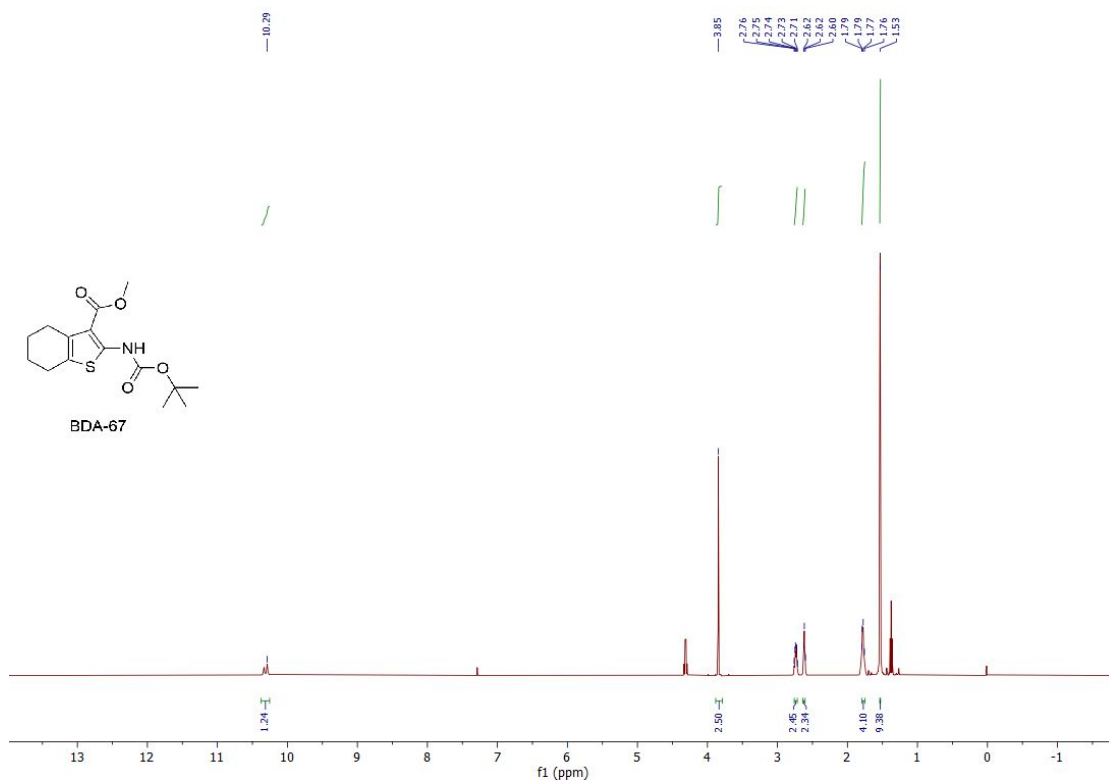

1725

1726  $^{13}\text{C}\{^1\text{H}\}$  NMR spectrum of **BDA-67** (126 MHz,  $\text{CDCl}_3$ )

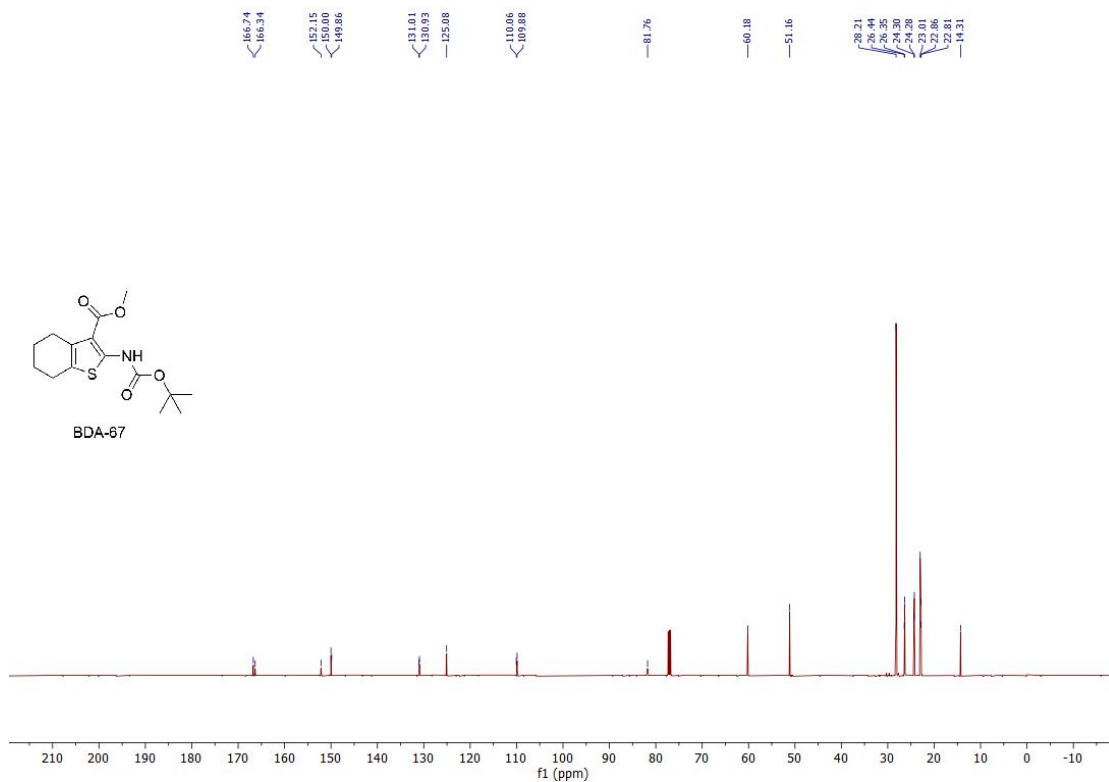

1727

1728  $^1\text{H}$  NMR spectrum of **BDA-68** (500 MHz,  $\text{CDCl}_3$ )

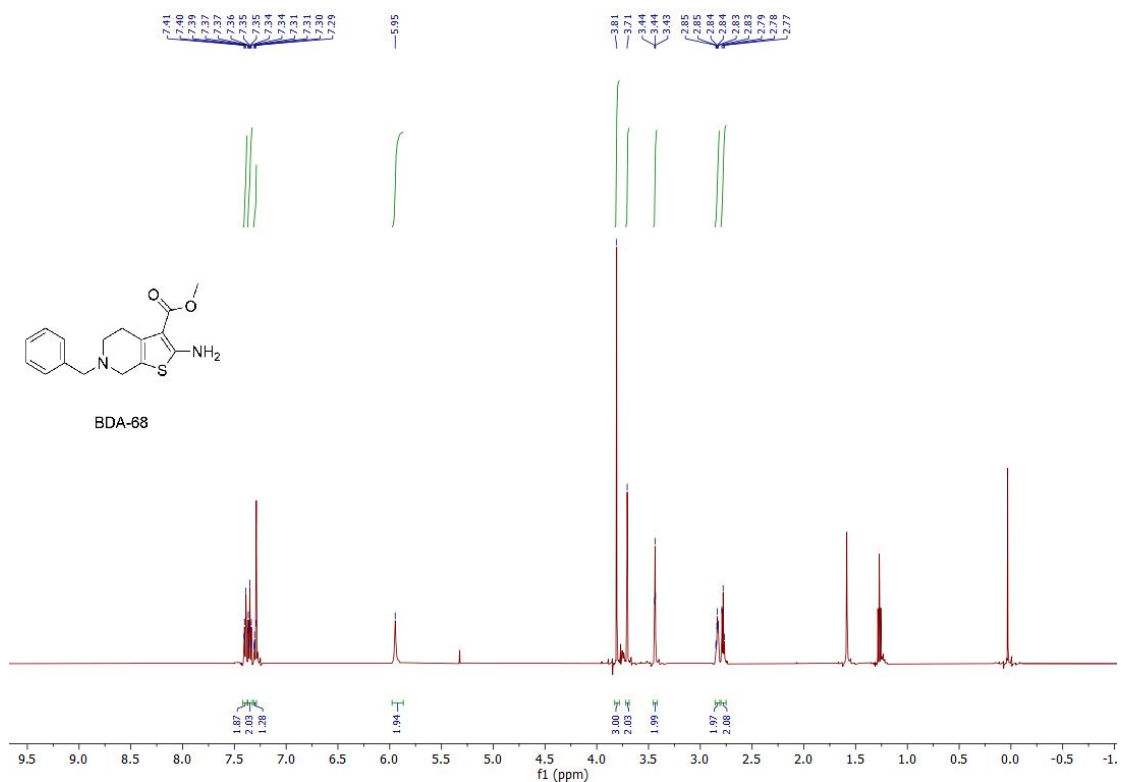

1729

1730  $^{13}\text{C}\{^1\text{H}\}$  NMR spectrum of **BDA-68** (126 MHz,  $\text{CDCl}_3$ )

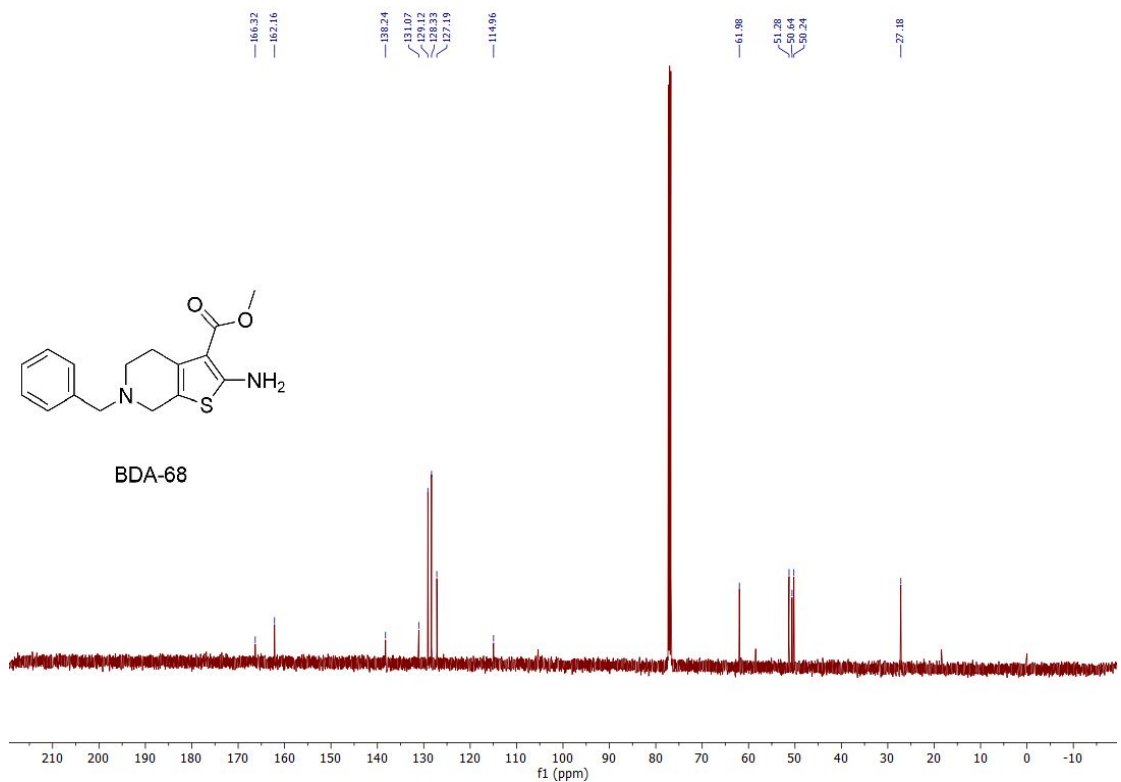

1731

1732  $^1\text{H}$  NMR spectrum of **BDA-69** (500 MHz,  $\text{CDCl}_3$ )

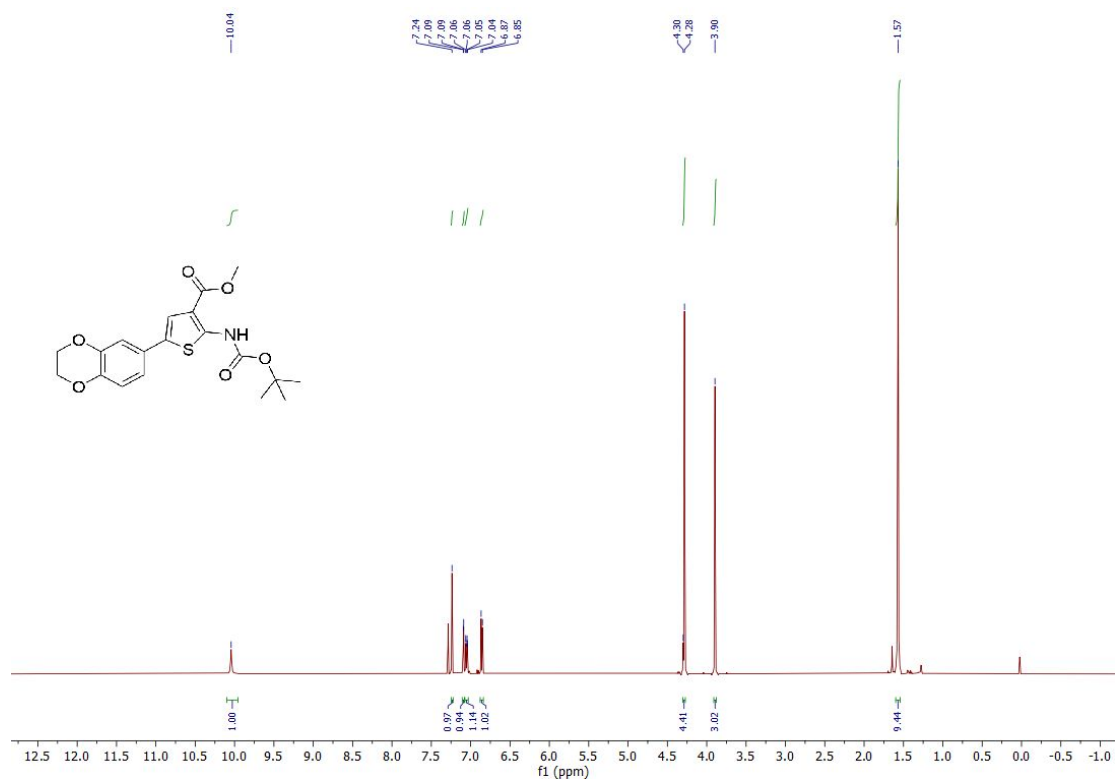

1733  $^{13}\text{C}\{^1\text{H}\}$  NMR spectrum of **BDA-69** (126 MHz,  $\text{CDCl}_3$ )

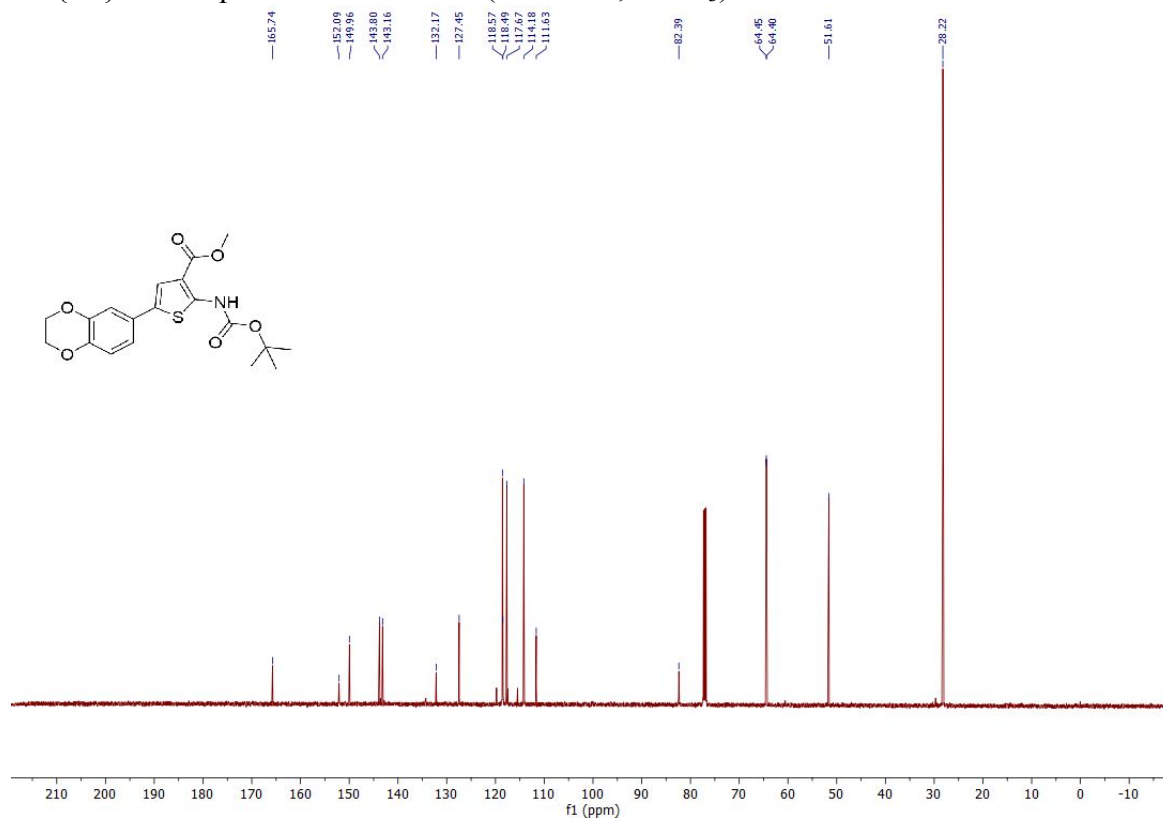

1735  $^1\text{H}$  NMR spectrum of **BDA-70** (500 MHz,  $\text{CDCl}_3$ )

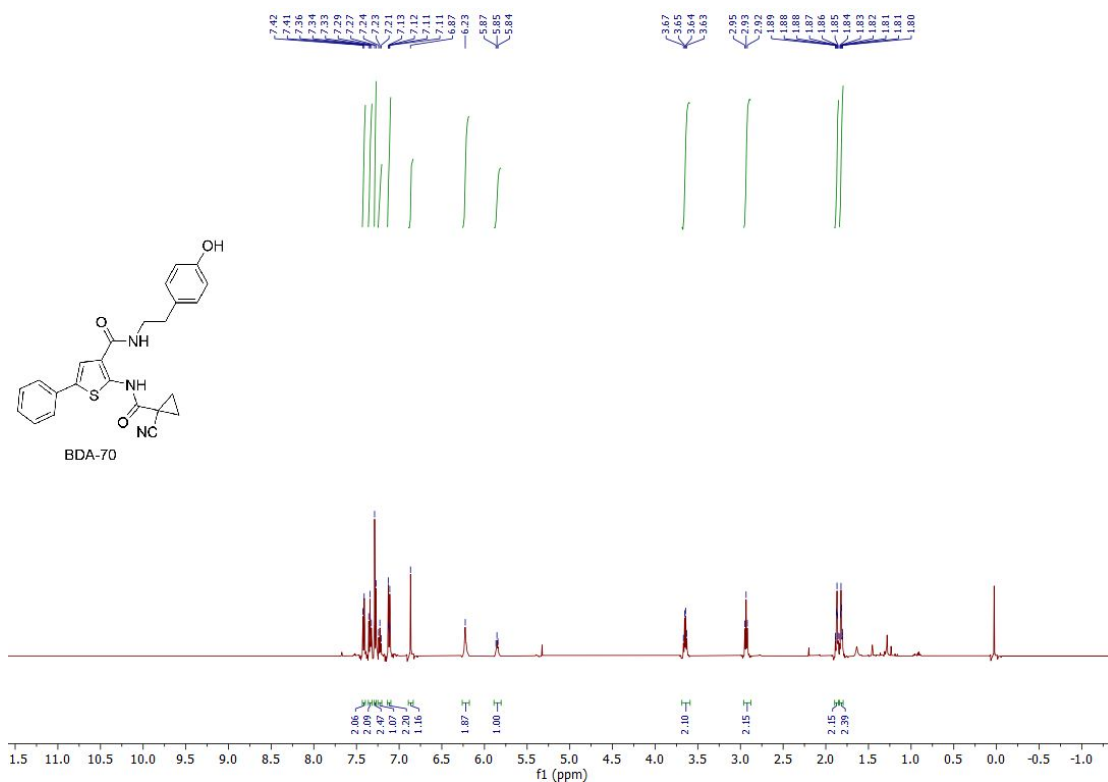

1736

1737  $^{13}\text{C}\{^1\text{H}\}$  NMR spectrum of **BDA-70** (126 MHz,  $\text{CDCl}_3$ )

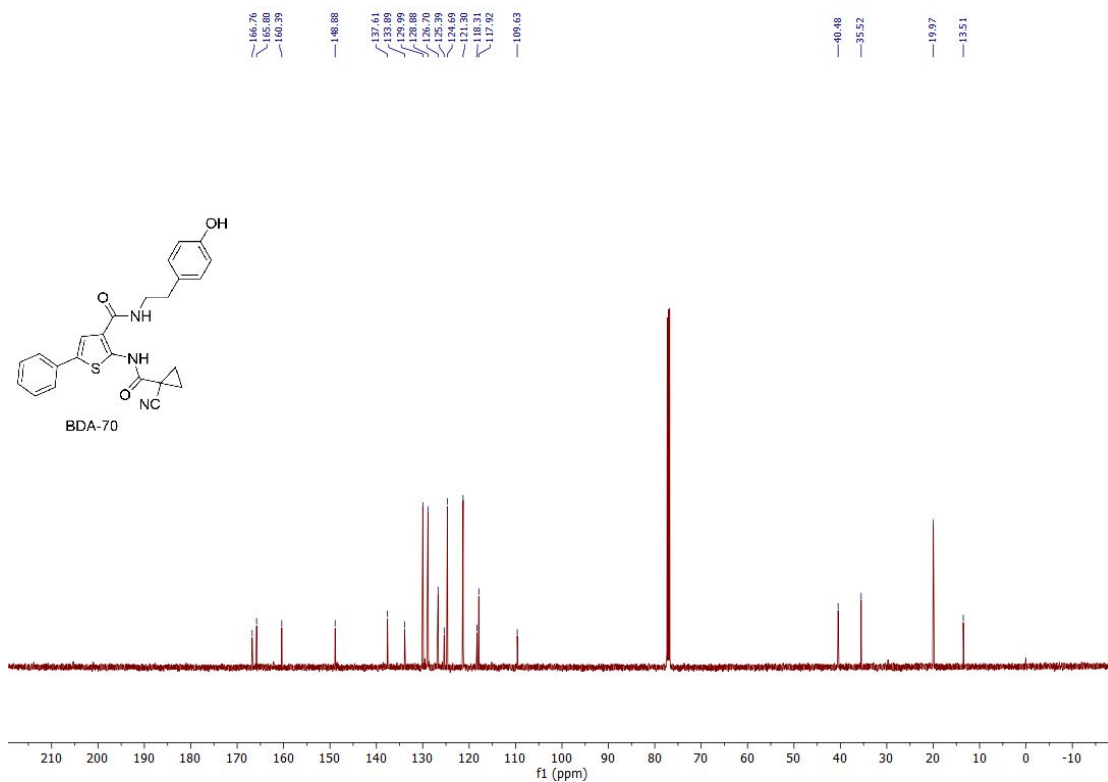

1738

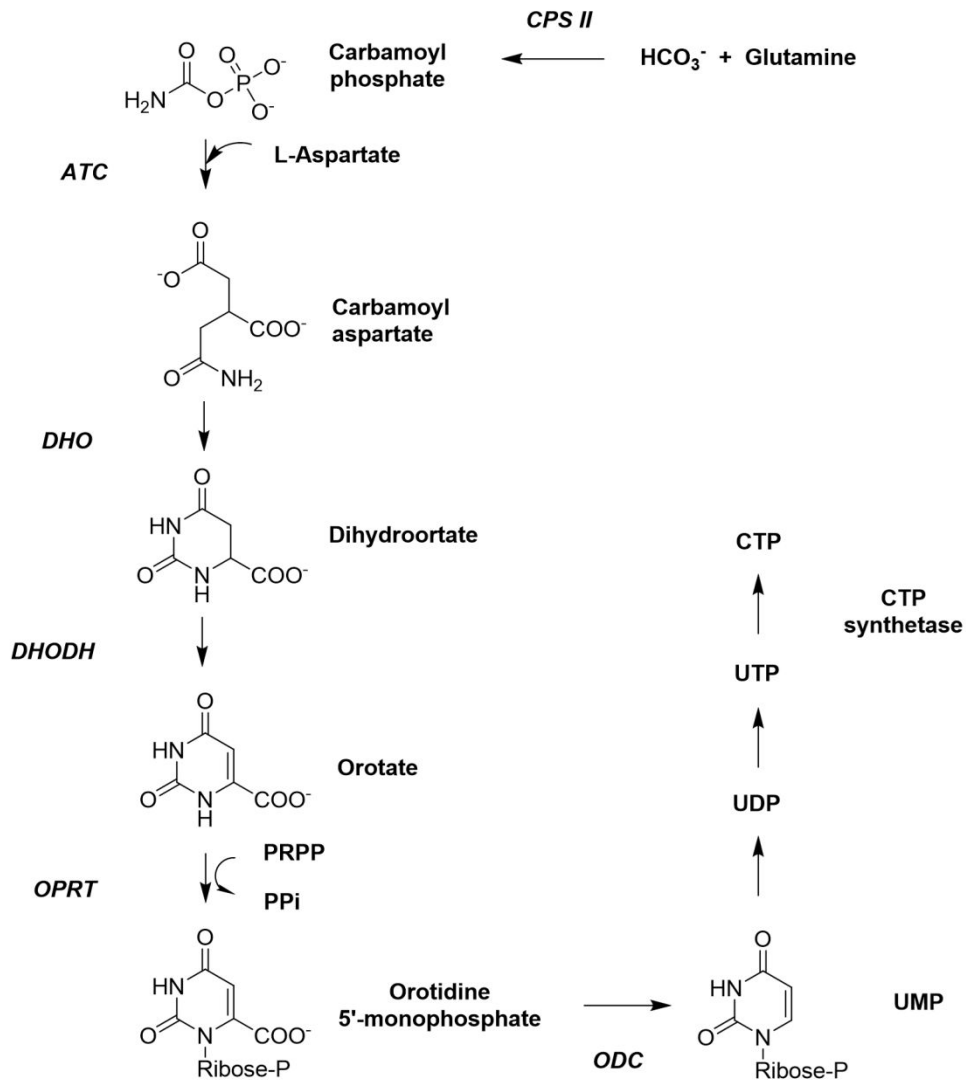

1739  
 1740 **Supporting information Figure 1.** The *de novo* pyrimidine biosynthesis pathway. Enzymes: CPS  
 1741 II, carbamoyl phosphate synthetase II; ATC, aspartate transcarbamoylase; DHO, dihydroorotase;  
 1742 DHODH, dihydroorotate dehydrogenase; OPRT, orotate phosphoribosyl transferase; ODC,  
 1743 orotidine 5'-monophosphate decarboxylase.

1744  
 1745  
 1746  
 1747  
 1748

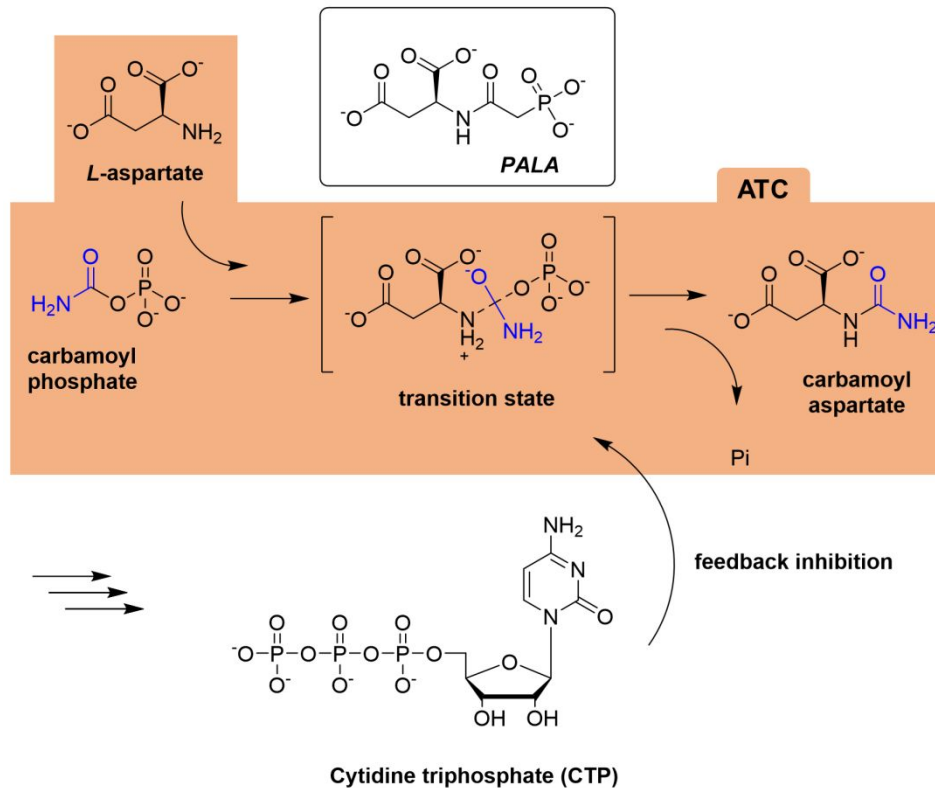

1749

1750 **Supporting information Figure 2.** The reaction catalyzed by ATC and feedback regulation  
 1751 mechanism in *de novo* pyrimidine biosynthesis pathway and structure of *PALA*. Aspartate  
 1752 Transcarbamoylase (ATC) combines L-aspartate and carbamoyl phosphate into carbamoyl  
 1753 aspartate through an enzyme stabilized transition state and inhibition feedback by CTP. The ATC  
 1754 inhibitor *PALA* closely resembles this transition state intermediate. CTP (a product of the  
 1755 pyrimidine biosynthesis pathway) provides feedback inhibition of ATC activity.

1756

1757

1758

1759

1760

1761



A

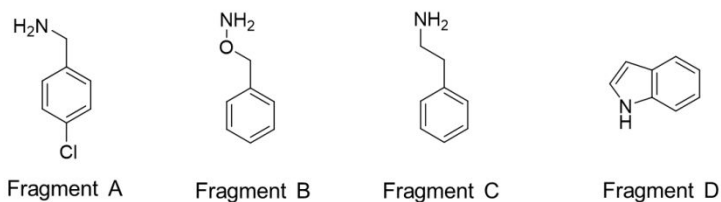

B

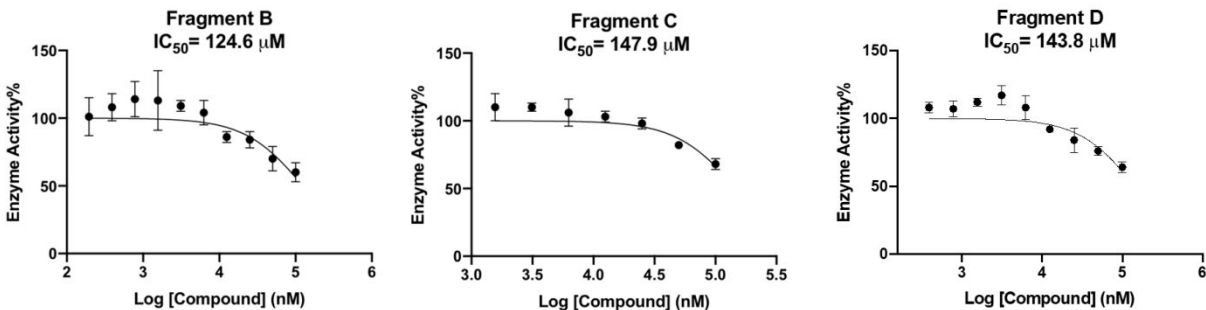

C

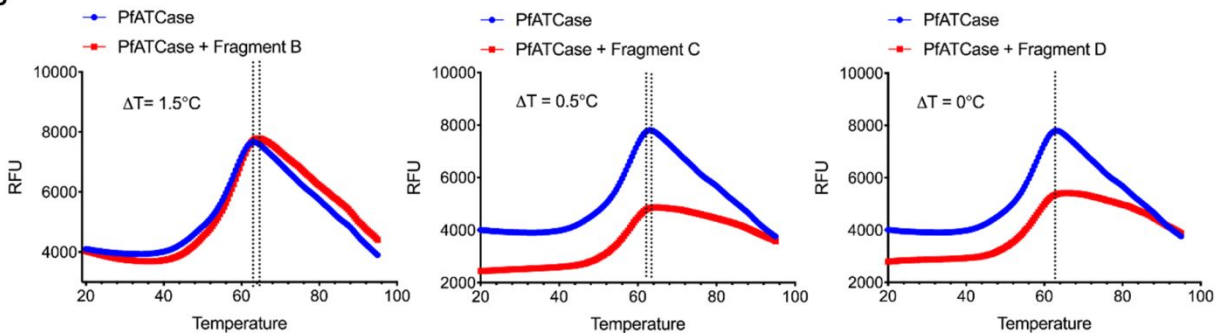

1762

1763 **Supporting information Figure 3.** Fragments bind directly to an allosteric pocket. (A) The  
1764 chemical structure of Fragment A-D. (B) *In vitro* enzyme assay to assess the *in vitro* activity of  
1765 Fragment B-D against *PfATC* (50 nM). (C) Differential scanning Fluorimetry (DSF) result  
1766 showing the thermal stabilization of *PfATC* (blue) and *PfATCase* in presence of Fragment B, C  
1767 and D (red).

1768

1769

1770

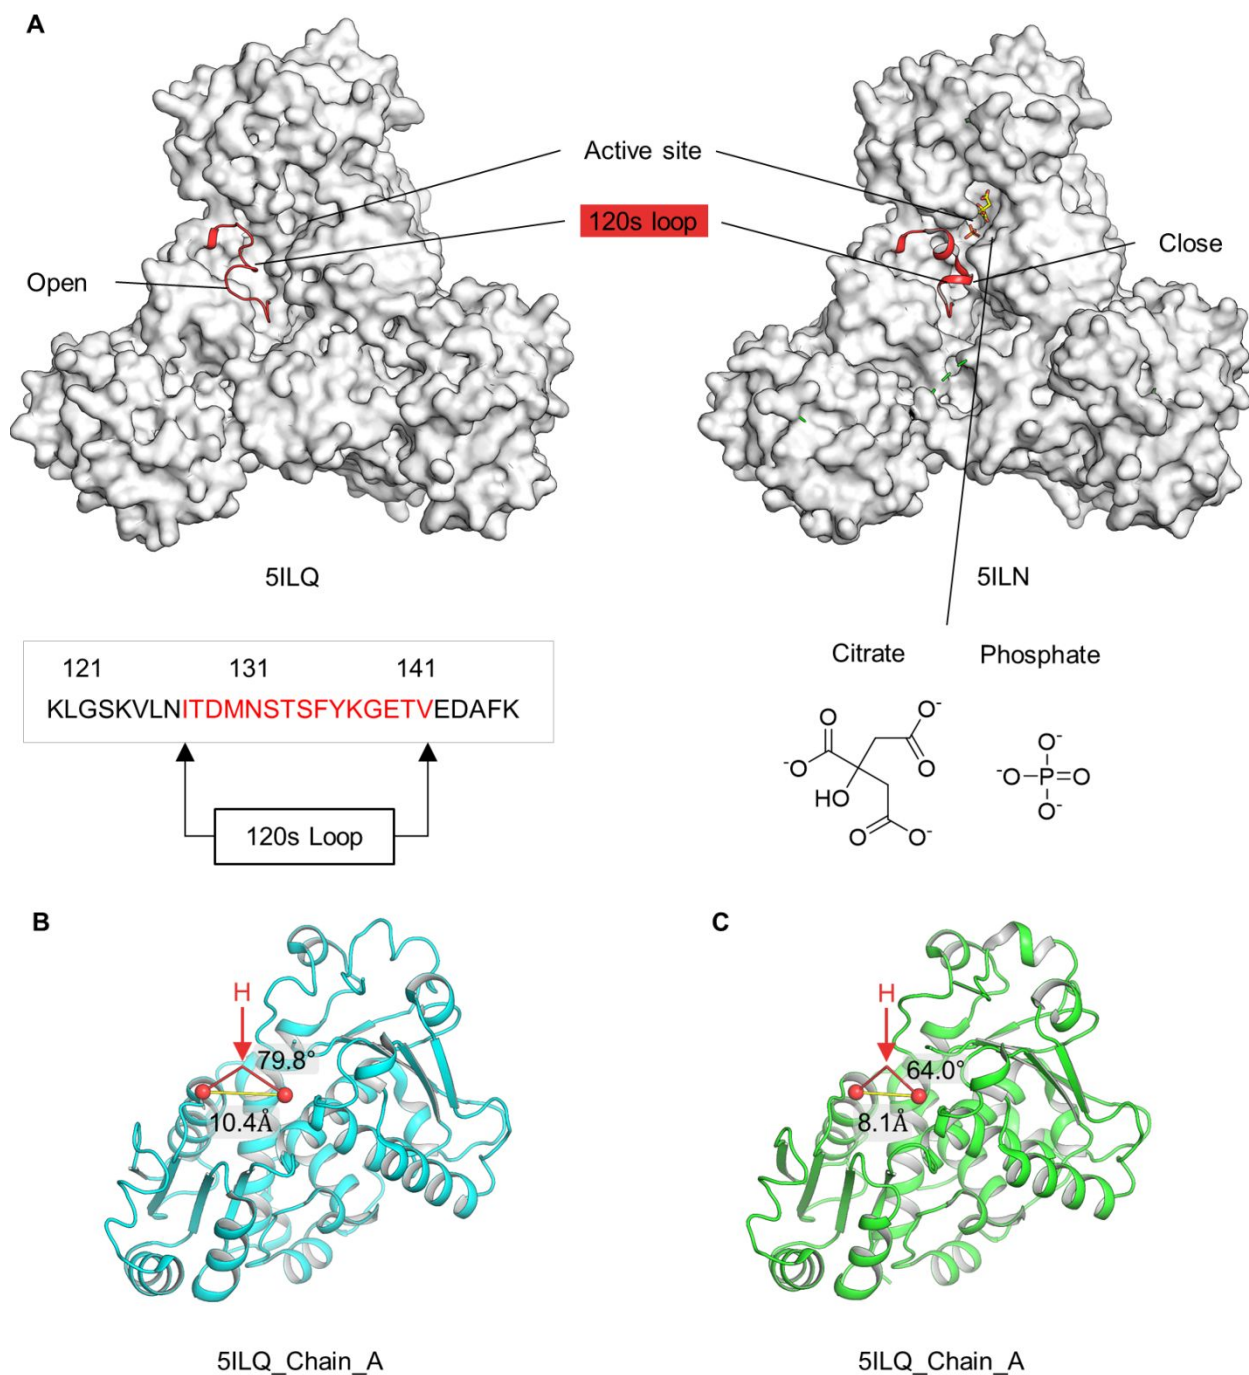

1771

1772 **Supporting information Figure 4.** Structure of T-state *PfATC* and R-state *PfATC*. (A) Apo-  
 1773 crystal structure of *PfATC* (left; PDB ID: 5ILQ) and the crystal structure of *PfATC* in complex  
 1774 with citrate (right; PDB ID: 5ILN), representing the T- and R-states, respectively. The 120s loop  
 1775 is highlighted in red, the open and close state of 120s loop are labeled. (B) Ribbon diagram  
 1776 representation of *PfATC* inactive monomer, the distance and angle between the domains are

1777 measured from the center of mass of Asp and CP domain (red dot) and a hinge point. (C) Ribbon  
1778 diagram representation of *Pf*ATC active monomer, the distance and angle between the domains are  
1779 measured from the center of mass of Asp and CP domain (red dot) and a hinge point.

1780

1781

1782

1783

1784

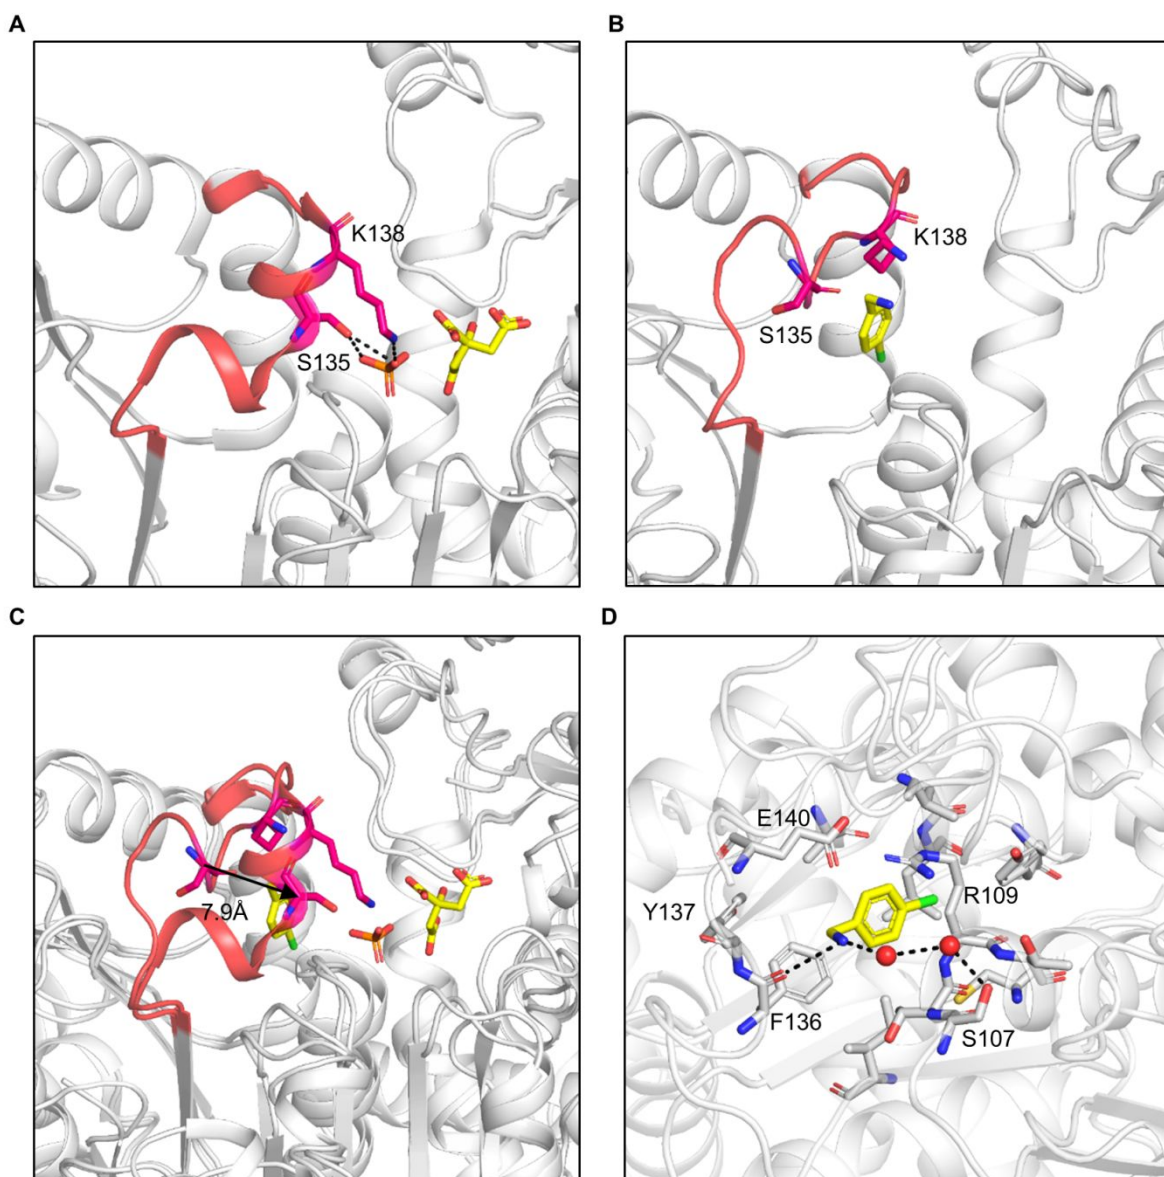

1785

1786 **Supporting information Figure 5.** Fragments target the allosteric pocket stabilize the inactive  
 1787 state of *PfATC*. (A) The crystal structure of the citrate:*PfATC* complex (PDB ID: 5ILN),  
 1788 representing the R-state (high substrate affinity, high activity) of *PfATC*, showing the important  
 1789 interactions of the 120s loop (highlighted in red) with phosphate. Citrate and phosphate are shown  
 1790 in sticks. (B) Crystal structure of the Fragment A:*PfATC* complex (PDB ID: 7ZCZ), representing  
 1791 the T-state (low substrate affinity, low activity) of *PfATC*, the residues Ser135 and Lys138 that  
 1792 form polar interactions with phosphate in the R-state *PfATC* are labeled. (C) Alignment of the  
 1793 crystal structure of Fragment A: *PfATC* complex (white; PDB ID: 7ZCZ) with the citrate:*PfATC*

1794 complex (light blue), the RMSD on  $\alpha$ -carbon is 0.226 Å, the 120s loop is highlighted in red. The  
1795 120s loop shifts by 8Å between the  $\alpha$ -carbons of Ser135 in the T-state to R-state. (D) Ribbon and  
1796 stick representation showing the key interactions between allosteric binding site of *Pf*ATC and  
1797 Fragment A.

1798

1799

1800

1801

1802

1803

1804

1805

1806

1807

1808

1809

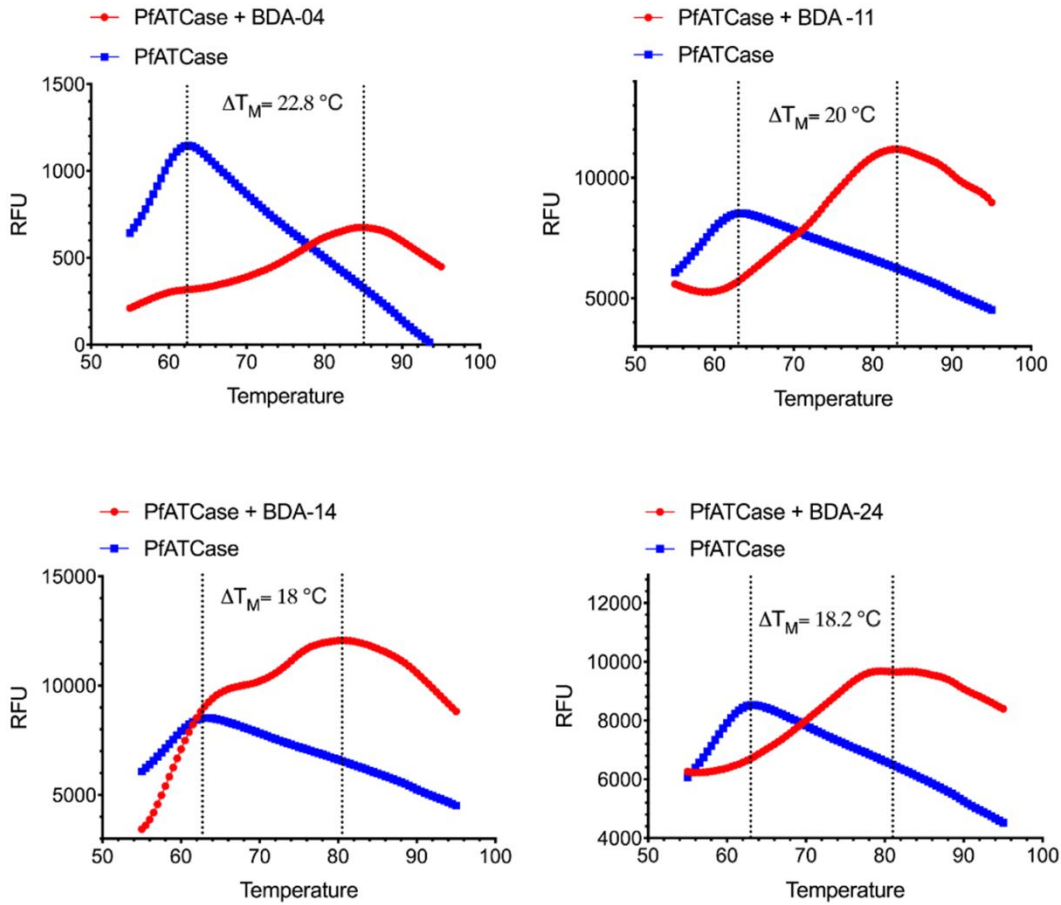

1810

1811 **Supporting information Figure 6.** Differential scanning Fluorimetry (DSF) results showing the  
 1812 thermal stabilization of *Pf*ATCase (blue) and *Pf*ATCase in presence of BDA-04, BDA-11, BDA-  
 1813 14, BDA-24. The  $T_M$  value of *Pf*ATCase increases by 22.8, 20, 18 and 18.2 degrees, respectively,  
 1814 after incubation with BDAs.

1815

1816

1817

1818

1819

1820

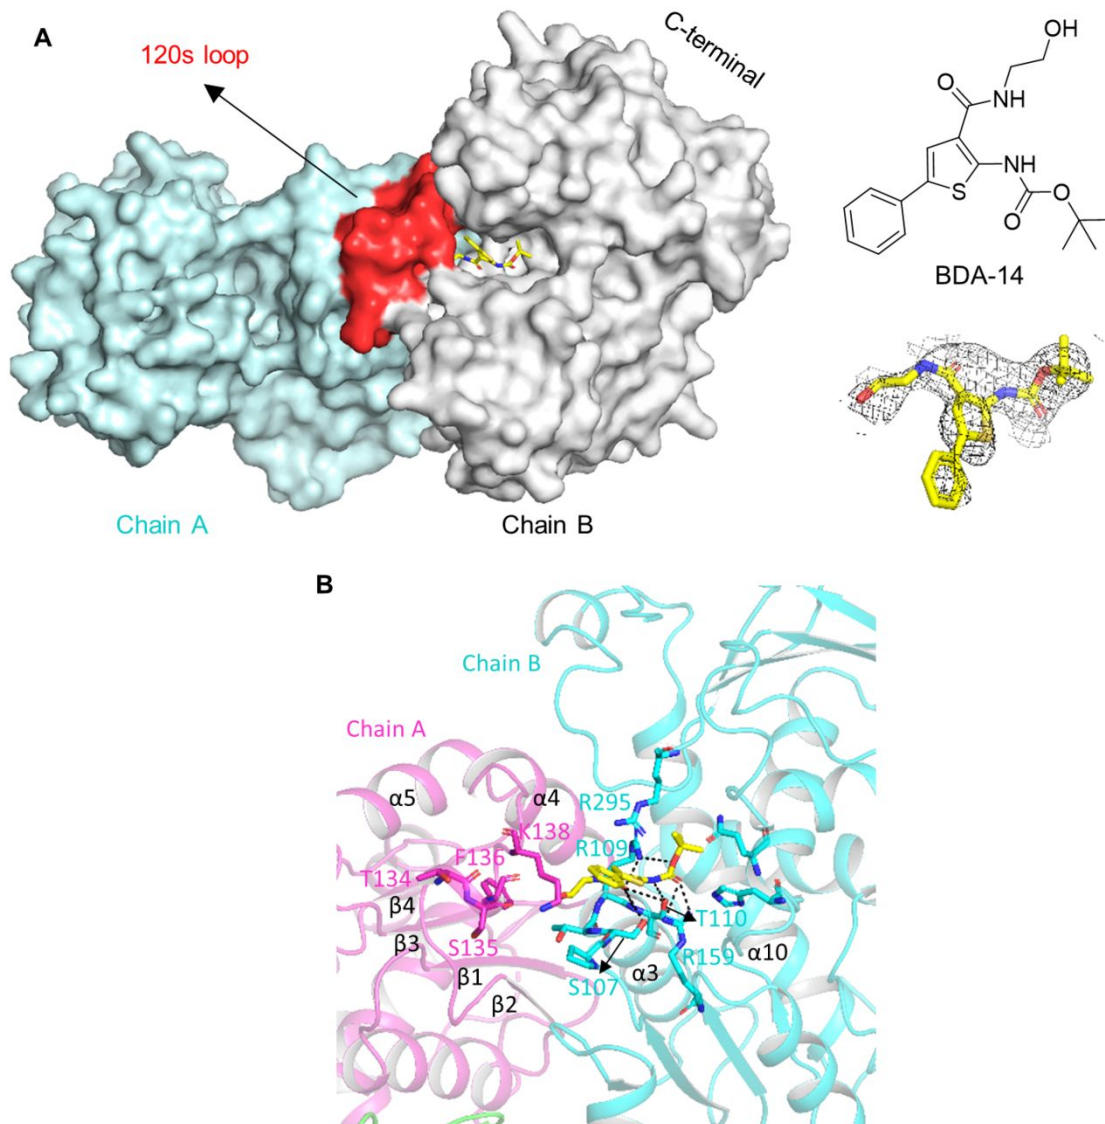

1821

1822 **Supporting information Figure 7.** BDA-14 binds at the allosteric pocket of *Pf*ATC. (A) Structure  
 1823 of *Pf*ATC in complex with BDA-14 showing the binding site of BDA-14. Two monomers of the  
 1824 trimer are shown. the 2F<sub>c</sub> - F<sub>o</sub> density map of BDA-04 is contoured at 0.7  $\sigma$ . the chemical structure  
 1825 of BDA-14 (right). (B) A stick representation showing the key interactions between the binding  
 1826 site of *Pf*ATC and BDA-14.

1827

1828

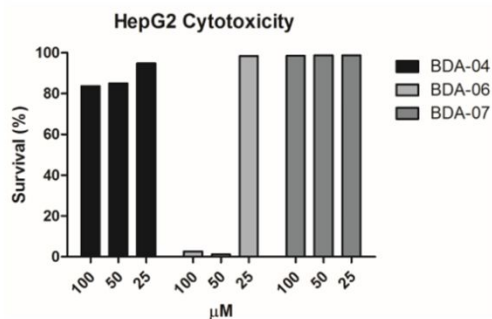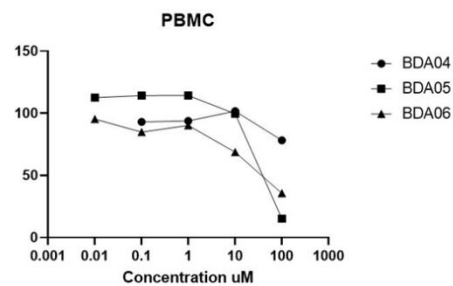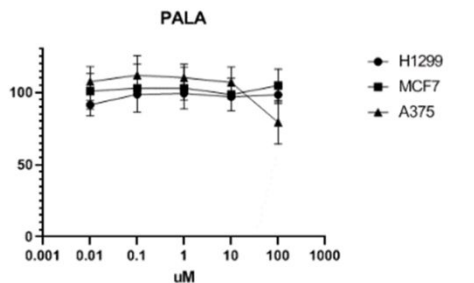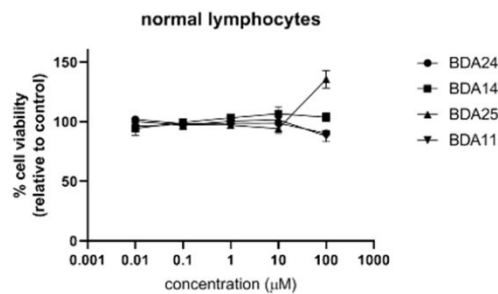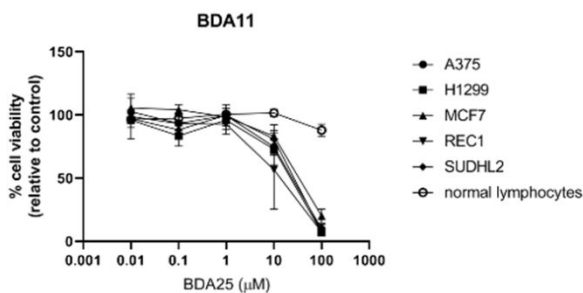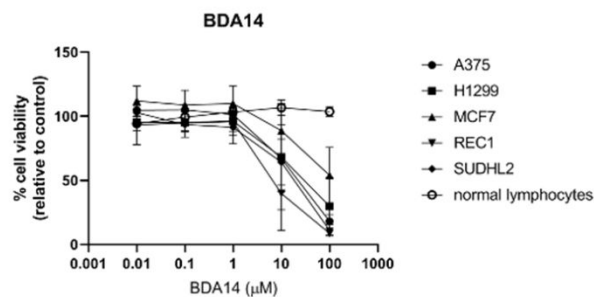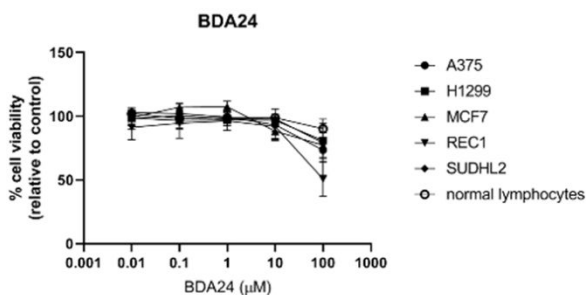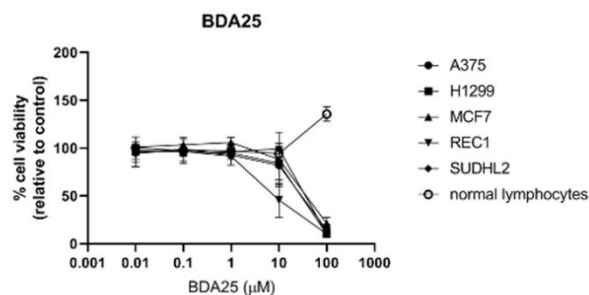

1829

1830 **Supporting information Figure 8.** Cytotoxicity study of BDAs Dose-response of BDAs vs human  
 1831 cell lines.

1832

1833

1834



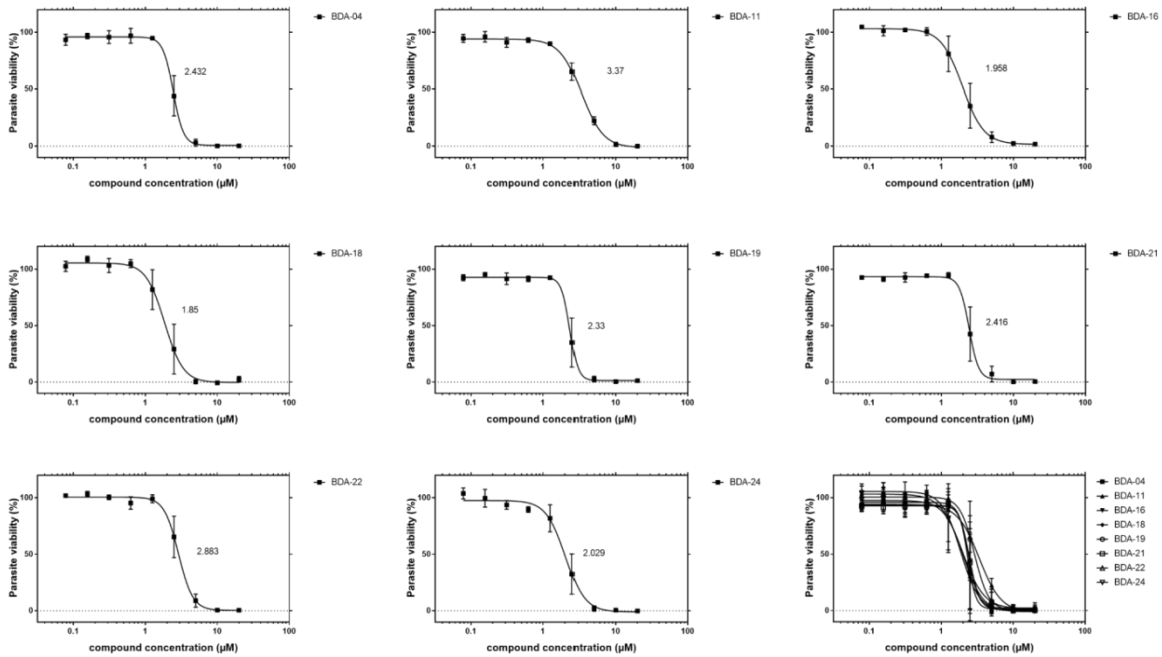

1835

1836 **Supporting information Figure 9.** Dose-response of BDAs vs *P. falciparum* 3D7(wild type) cell  
 1837 lines. EC<sub>50</sub> value of BDA-04, BDA-11, BDA-16, BDA-18, BDA-19, BDA-21, BDA-22 and BDA-  
 1838 24 is 2.43 µM, 3.37 µM, 1.96 µM, 1.85 µM, 2.33 µM, 2.42 µM, 2.89 µM and 2.03 µM respectively.

1839

1840

1841

1842

1843

1844

1845

1846

1847

1848

1849

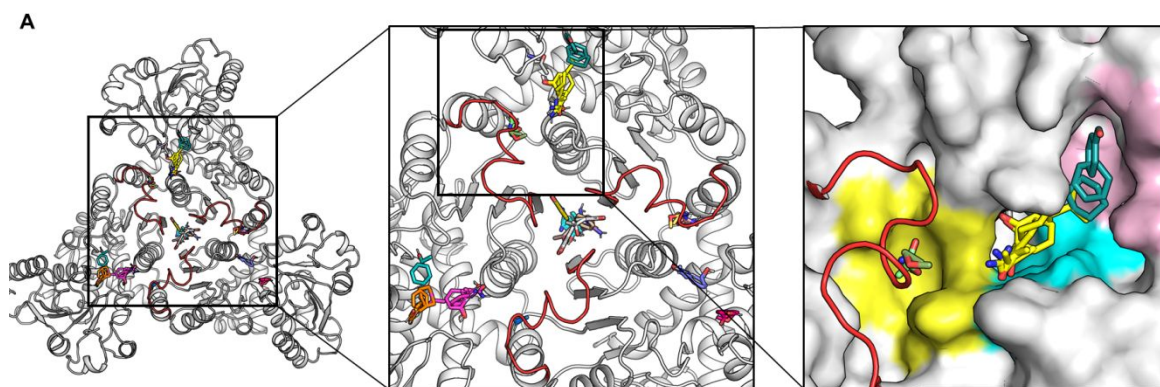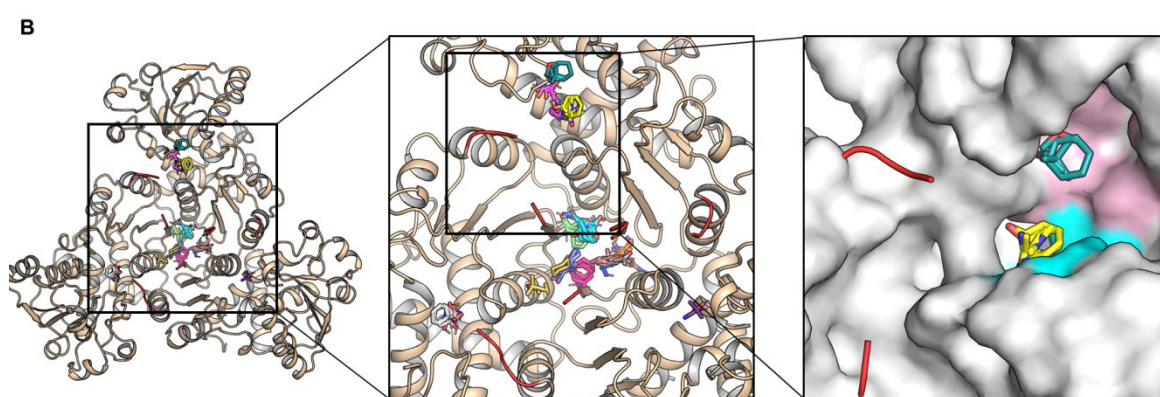

**C**

| PDB entry | Structural notes   | Allosteric site (site A) | Activity site (site B + C) | Other sites | Total probe cluster count |
|-----------|--------------------|--------------------------|----------------------------|-------------|---------------------------|
| 5ILQ      | <i>PfATC</i> , apo | 18                       | 42                         | 30          | 90                        |
| 5G1O      | <i>HsATC</i> , apo | 0                        | 27                         | 68          | 95                        |

1850

1851 **Supporting information Figure 10.** Potential off-target effect of BDA-04 supported by mapping  
 1852 the apo structure (apo-*PfATC*: 5ILQ; apo-*HsATC*: 5G1O) using FTMap. (A) Probe clusters in apo-  
 1853 *PfATC* crystal structure. Probe clusters are shown in sticks and 120s loop highlighted in red.  
 1854 Allosteric pocket (site A) and Active site (site B and site C) are colored as follows: site A, yellow;  
 1855 site B, blue; site C, pink. (B) Probe clusters in apo-*HsATC* crystal structure. Active site (site B and  
 1856 site C) are colored as follows: site B, blue; site C, pink. (C) Summary of FTMap mapping results.  
 1857 18 probe clusters binding to *PfATC* allosteric pocket while 0 probe cluster binding to *HsATC*Case  
 1858 allosteric pocket (120s loop of *HsATC* is partially missing as shown in (B)).

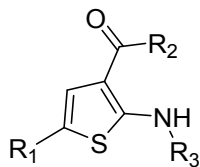

| Cpd    | Structure | PfATC<br>IC <sub>50</sub> (nM) | HsATC<br>IC <sub>50</sub> (nM) |
|--------|-----------|--------------------------------|--------------------------------|
| BDA-01 |           |                                |                                |
| BDA-02 |           |                                |                                |
| BDA-03 |           |                                |                                |
| BDA-04 |           |                                |                                |
| BDA-05 |           |                                |                                |

|                      |                                                                                     |                                                                                                                                          |                                                                                                                                           |
|----------------------|-------------------------------------------------------------------------------------|------------------------------------------------------------------------------------------------------------------------------------------|-------------------------------------------------------------------------------------------------------------------------------------------|
| <p><b>BDA-06</b></p> | 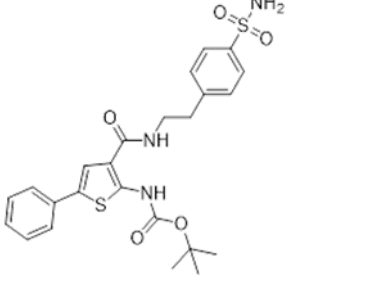   | <p><b>BDA-06</b><br/>IC<sub>50</sub> = 1873 nM</p>     | <p><b>BDA-06</b><br/>IC<sub>50</sub> = 287.0 nM</p>    |
| <p><b>BDA-07</b></p> |    | <p><b>BDA-07</b><br/>IC<sub>50</sub> = 996.5 nM</p>    | <p><b>BDA-07</b><br/>IC<sub>50</sub> = 115.9 nM</p>    |
| <p><b>BDA-08</b></p> |   | <p><b>BDA-08</b><br/>IC<sub>50</sub> = 14684 nM</p>    | <p>No</p>                                                                                                                                 |
| <p><b>BDA-09</b></p> |  | <p><b>BDA-09</b><br/>IC<sub>50</sub> = 241.1 nM</p>  | <p><b>BDA-09</b><br/>IC<sub>50</sub> = 195.6 nM</p>  |
| <p><b>BDA-10</b></p> |  | <p><b>BDA-10</b><br/>IC<sub>50</sub> = 5085 nM</p>   | <p><b>BDA-10</b><br/>IC<sub>50</sub> = 298.4 nM</p>  |
| <p><b>BDA-11</b></p> |  | <p><b>BDA-11</b><br/>IC<sub>50</sub> = 45.65 nM</p>  | <p><b>BDA-11</b><br/>IC<sub>50</sub> = 115.9 nM</p>  |

|                      |                                                                                     |                                                                                                                                          |                                                                                                                                           |
|----------------------|-------------------------------------------------------------------------------------|------------------------------------------------------------------------------------------------------------------------------------------|-------------------------------------------------------------------------------------------------------------------------------------------|
| <p><b>BDA-12</b></p> | 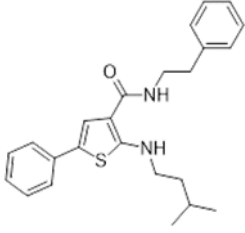   | <p><b>BDA-12</b><br/>IC<sub>50</sub> = 158.9 nM</p>    | <p><b>BDA-12</b><br/>IC<sub>50</sub> = 655.2 nM</p>    |
| <p><b>BDA-13</b></p> |    | <p><b>BDA-13</b><br/>IC<sub>50</sub> = 639.1 nM</p>    | <p><b>BDA-13</b><br/>IC<sub>50</sub> = 267.5 nM</p>    |
| <p><b>BDA-14</b></p> |    | <p><b>BDA-14</b><br/>IC<sub>50</sub> = 114.3 nM</p>    | <p><b>BDA-14</b><br/>IC<sub>50</sub> = 137.2 nM</p>    |
| <p><b>BDA-15</b></p> |   | <p><b>BDA-15</b><br/>IC<sub>50</sub> = 5223.7 uM</p>  | <p>No</p>                                                                                                                                 |
| <p><b>BDA-16</b></p> |  | <p><b>BDA-16</b><br/>IC<sub>50</sub> = 6081 nM</p>   | <p><b>BDA-16</b><br/>IC<sub>50</sub> = 869.5 nM</p>  |
| <p><b>BDA-17</b></p> |  | <p><b>BDA-17</b><br/>IC<sub>50</sub> = 1149 nM</p>   | <p><b>BDA-17</b><br/>IC<sub>50</sub> = 308.0 nM</p>  |

|                      |                                                                                     |                                                                                                                                         |                                                                                                                                          |
|----------------------|-------------------------------------------------------------------------------------|-----------------------------------------------------------------------------------------------------------------------------------------|------------------------------------------------------------------------------------------------------------------------------------------|
| <p><b>BDA-18</b></p> | 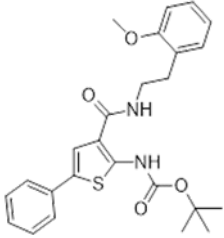   | <p><b>BDA-18</b><br/>IC<sub>50</sub>= 1328 nM</p>     | <p><b>BDA-18</b><br/>IC<sub>50</sub>= 259.0 nM</p>    |
| <p><b>BDA-19</b></p> |    | <p><b>BDA-19</b><br/>IC<sub>50</sub>=4073 nM</p>      | <p><b>BDA-19</b><br/>IC<sub>50</sub>= 678.0 nM</p>    |
| <p><b>BDA-20</b></p> |    | <p><b>BDA-20</b><br/>IC<sub>50</sub>= 6311 nM</p>     | <p><b>BDA-20</b><br/>IC<sub>50</sub>= 1997 nM</p>     |
| <p><b>BDA-21</b></p> |   | <p><b>BDA-21</b><br/>IC<sub>50</sub>= 553.7nM</p>    | <p><b>BDA-21</b><br/>IC<sub>50</sub>= 620.3 nM</p>   |
| <p><b>BDA-22</b></p> |  | <p><b>BDA-22</b><br/>IC<sub>50</sub>= 472.9 nM</p>  | <p><b>BDA-22</b><br/>IC<sub>50</sub>= 573.0 nM</p>  |
| <p><b>BDA-23</b></p> |  | <p><b>BDA-23</b><br/>IC<sub>50</sub>= 409.2 nM</p>  | <p><b>BDA-23</b><br/>IC<sub>50</sub>= 755.5 nM</p>  |

|                      |                                                                                     |                                                                                                                                         |                                                                                                                                           |
|----------------------|-------------------------------------------------------------------------------------|-----------------------------------------------------------------------------------------------------------------------------------------|-------------------------------------------------------------------------------------------------------------------------------------------|
| <p><b>BDA-24</b></p> | 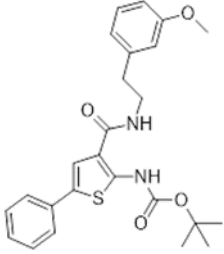   | <p><b>BDA-24</b><br/>IC<sub>50</sub> = 102.7 nM</p>   | <p><b>BDA-24</b><br/>IC<sub>50</sub> = 316.3 nM</p>    |
| <p><b>BDA-25</b></p> |    | <p><b>BDA-25</b><br/>IC<sub>50</sub> = 181.2 nM</p>   | <p><b>BDA-25</b><br/>IC<sub>50</sub> = 402.7 nM</p>    |
| <p><b>BDA-26</b></p> |    | <p><b>BDA-26</b><br/>IC<sub>50</sub> = 575.7 nM</p>   | <p><b>BDA-26</b><br/>IC<sub>50</sub> = 554.8 nM</p>    |
| <p><b>BDA-27</b></p> |  | <p><b>BDA-27</b><br/>IC<sub>50</sub> = 1230 nM</p>  | <p><b>BDA-27</b><br/>IC<sub>50</sub> = 369.3 nM</p>  |
| <p><b>BDA-28</b></p> |  | <p><b>BDA-28</b><br/>IC<sub>50</sub> = 1627 nM</p>  | <p><b>BDA-28</b><br/>IC<sub>50</sub> = 391.2 nM</p>  |

|                      |                                                                                     |                                                                                                                                          |                                                                                                                                           |
|----------------------|-------------------------------------------------------------------------------------|------------------------------------------------------------------------------------------------------------------------------------------|-------------------------------------------------------------------------------------------------------------------------------------------|
| <p><b>BDA-29</b></p> | 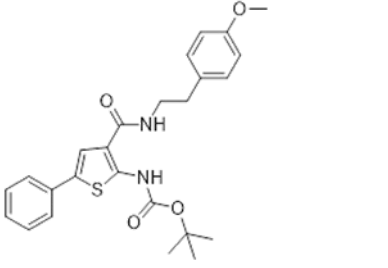   | <p><b>BDA-29</b><br/>IC<sub>50</sub> = 1616 nM</p>     | <p><b>BDA-29</b><br/>IC<sub>50</sub> = 585.1 nM</p>    |
| <p><b>BDA-30</b></p> |    | <p><b>BDA-30</b><br/>IC<sub>50</sub> = 2624 nM</p>     | <p><b>BDA-30</b><br/>IC<sub>50</sub> = 397.0 nM</p>    |
| <p><b>BDA-31</b></p> |   | <p><b>BDA-31</b><br/>IC<sub>50</sub> = 1048 nM</p>    | <p><b>BDA-31</b><br/>IC<sub>50</sub> = 332.0 nM</p>   |
| <p><b>BDA-32</b></p> |  | <p><b>BDA-32</b><br/>IC<sub>50</sub> = 2763 nM</p>   | <p><b>BDA-32</b><br/>IC<sub>50</sub> = 640.6 nM</p>  |
| <p><b>BDA-33</b></p> |  | <p><b>BDA-33</b><br/>IC<sub>50</sub> = 515.9 nM</p>  | <p><b>BDA-33</b><br/>IC<sub>50</sub> = 100.5 nM</p>  |
| <p><b>BDA-34</b></p> |  | <p><b>BDA-34</b><br/>IC<sub>50</sub> = 848.9 nM</p>  | <p><b>BDA-34</b><br/>IC<sub>50</sub> = 211.9 nM</p>  |



|                      |                                                                                     |                                                                                                                                                       |                                                                                                                                                        |
|----------------------|-------------------------------------------------------------------------------------|-------------------------------------------------------------------------------------------------------------------------------------------------------|--------------------------------------------------------------------------------------------------------------------------------------------------------|
| <p><b>BDA-35</b></p> | 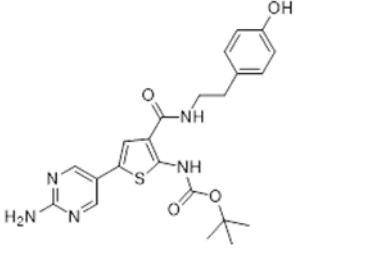   | <p><b>BDA-35</b><br/><math>IC_{50} = 2077 \text{ nM}</math></p>     | <p><b>BDA-35</b><br/><math>IC_{50} = 233.9 \text{ nM}</math></p>    |
| <p><b>BDA-36</b></p> |    | <p>No</p>                                                                                                                                             | <p><b>BDA-36</b><br/><math>IC_{50} = 3839 \text{ nM}</math></p>     |
| <p><b>BDA-37</b></p> |   | <p><b>BDA-37</b><br/><math>IC_{50} = 1080 \text{ nM}</math></p>    | <p><b>BDA-37</b><br/><math>IC_{50} = 348.7 \text{ nM}</math></p>   |
| <p><b>BDA-38</b></p> |  | <p><b>BDA-38</b><br/><math>IC_{50} = 805.2 \text{ nM}</math></p>  | <p><b>BDA-38</b><br/><math>IC_{50} = 184.8 \text{ nM}</math></p>  |
| <p><b>BDA-39</b></p> |  | <p><b>BDA-39</b><br/><math>IC_{50} = 5645 \text{ nM}</math></p>   | <p><b>BDA-39</b><br/><math>IC_{50} = 15441 \text{ nM}</math></p>  |

|                      |                                                                                     |                                                                                                                                  |                                                                                                                                   |
|----------------------|-------------------------------------------------------------------------------------|----------------------------------------------------------------------------------------------------------------------------------|-----------------------------------------------------------------------------------------------------------------------------------|
| <p><b>BDA-40</b></p> | 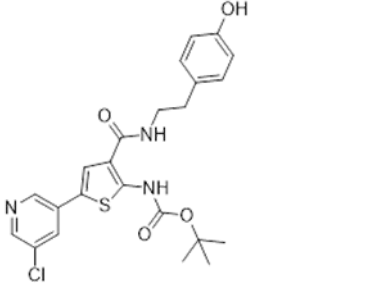   | <p>No</p>                                                                                                                        |  <p>BDA-40<br/>IC<sub>50</sub>= 11381 nM</p>   |
| <p><b>BDA-41</b></p> |    |  <p>BDA-41<br/>IC<sub>50</sub>= 673 nM</p>     |  <p>BDA-41<br/>IC<sub>50</sub>= 28.92 nM</p>   |
| <p><b>BDA-42</b></p> |   |  <p>BDA-42<br/>IC<sub>50</sub>= 12212 nM</p>  |  <p>BDA-42<br/>IC<sub>50</sub>= 2423 nM</p>   |
| <p><b>BDA-43</b></p> |  |  <p>BDA-43<br/>IC<sub>50</sub>= 18357 nM</p> |  <p>BDA-43<br/>IC<sub>50</sub>= 2087 nM</p>  |
| <p><b>BDA-44</b></p> |  |  <p>BDA-44<br/>IC<sub>50</sub>= 6112 nM</p>  |  <p>BDA-44<br/>IC<sub>50</sub>= 829.9 nM</p> |

|                      |                                                                                     |                                                                                                                                         |                                                                                                                                           |
|----------------------|-------------------------------------------------------------------------------------|-----------------------------------------------------------------------------------------------------------------------------------------|-------------------------------------------------------------------------------------------------------------------------------------------|
| <p><b>BDA-45</b></p> | 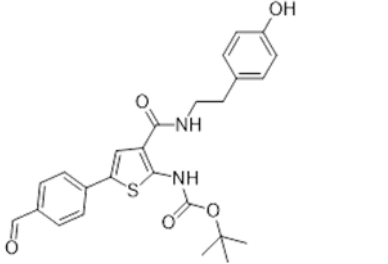   | <p><b>BDA-45</b><br/>IC<sub>50</sub> = 3769 nM</p>    | <p><b>BDA-45</b><br/>IC<sub>50</sub> = 123.9 nM</p>    |
| <p><b>BDA-46</b></p> |    | <p><b>BDA-46</b><br/>IC<sub>50</sub> = 1637 nM</p>    | <p><b>BDA-46</b><br/>IC<sub>50</sub> = 740.5 nM</p>    |
| <p><b>BDA-47</b></p> |   | <p><b>BDA-47</b><br/>IC<sub>50</sub> = 1534 nM</p>   | <p><b>BDA-47</b><br/>IC<sub>50</sub> = 238.3 nM</p>   |
| <p><b>BDA-48</b></p> |  | <p><b>BDA-48</b><br/>IC<sub>50</sub> = 1665 nM</p>  | <p><b>BDA-48</b><br/>IC<sub>50</sub> = 124.8 nM</p>  |
| <p><b>BDA-49</b></p> |  | <p><b>BDA-49</b><br/>IC<sub>50</sub> = 5943 nM</p>  | <p><b>BDA-49</b><br/>IC<sub>50</sub> = 729.1 nM</p>  |

|                      |                                                                                     |                                                                                                                                          |                                                                                                                                           |
|----------------------|-------------------------------------------------------------------------------------|------------------------------------------------------------------------------------------------------------------------------------------|-------------------------------------------------------------------------------------------------------------------------------------------|
| <p><b>BDA-50</b></p> | 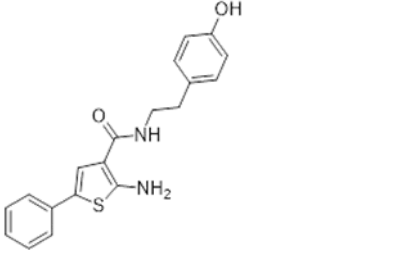   | <p><b>BDA-50</b><br/>IC<sub>50</sub> = 1139 nM</p>     | <p><b>BDA-50</b><br/>IC<sub>50</sub> = 360.1 nM</p>    |
| <p><b>BDA-51</b></p> |    | <p><b>BDA-51</b><br/>IC<sub>50</sub> = 1243 nM</p>     | <p><b>BDA-51</b><br/>IC<sub>50</sub> = 225.7 nM</p>    |
| <p><b>BDA-52</b></p> |   | <p><b>BDA-52</b><br/>IC<sub>50</sub> = 558.1 nM</p>   | <p><b>BDA-52</b><br/>IC<sub>50</sub> = 119.1 nM</p>   |
| <p><b>BDA-53</b></p> |  | <p><b>BDA-53</b><br/>IC<sub>50</sub> = 2720 nM</p>   | <p><b>BDA-53</b><br/>IC<sub>50</sub> = 382.9 nM</p>  |
| <p><b>BDA-54</b></p> |  | <p><b>BDA-54</b><br/>IC<sub>50</sub> = 844.9 nM</p>  | <p><b>BDA-54</b><br/>IC<sub>50</sub> = 157.9 nM</p>  |

|                      |                                                                                     |                                                                                                                                         |                                                                                                                                          |
|----------------------|-------------------------------------------------------------------------------------|-----------------------------------------------------------------------------------------------------------------------------------------|------------------------------------------------------------------------------------------------------------------------------------------|
| <p><b>BDA-55</b></p> | 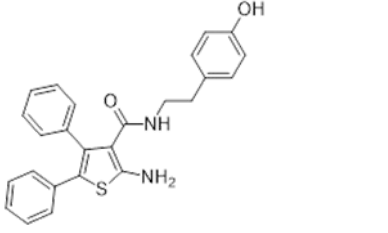   | <p>No</p>                                                                                                                               | <p>No</p>                                                                                                                                |
| <p><b>BDA-56</b></p> |    | <p><b>BDA-56</b><br/>IC<sub>50</sub> = 2221 nM</p>    | <p><b>BDA-56</b><br/>IC<sub>50</sub> = 555.9 nM</p>   |
| <p><b>BDA-57</b></p> |    | <p><b>BDA-57</b><br/>IC<sub>50</sub> = 799.7 nM</p>   | <p><b>BDA-57</b><br/>IC<sub>50</sub> = 380.8 nM</p>   |
| <p><b>BDA-58</b></p> |  | <p><b>BDA-58</b><br/>IC<sub>50</sub> = 4833 nM</p>  | <p><b>BDA-58</b><br/>IC<sub>50</sub> = 1227 nM</p>  |
| <p><b>BDA-59</b></p> |  | <p><b>BDA-59</b><br/>IC<sub>50</sub> = 3109 nM</p>  | <p><b>BDA-59</b><br/>IC<sub>50</sub> = 2588 nM</p>  |
| <p><b>BDA-60</b></p> |  | <p><b>BDA-60</b><br/>IC<sub>50</sub> = 2013 nM</p>  | <p><b>BDA-60</b><br/>IC<sub>50</sub> = 1046 nM</p>  |

|                      |                                                                                     |                                                                                                                                          |                                                                                                                                            |
|----------------------|-------------------------------------------------------------------------------------|------------------------------------------------------------------------------------------------------------------------------------------|--------------------------------------------------------------------------------------------------------------------------------------------|
| <p><b>BDA-61</b></p> | 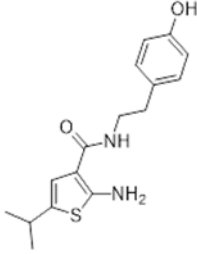   | <p><b>BDA-61</b><br/>IC<sub>50</sub> = 1977 nM</p>     | <p><b>BDA-61</b><br/>IC<sub>50</sub> = 862.4 nM</p>     |
| <p><b>BDA-62</b></p> |    | <p><b>BDA-62</b><br/>IC<sub>50</sub> = 2200 nM</p>     | <p><b>BDA-62</b><br/>IC<sub>50</sub> = 1125 nM</p>      |
| <p><b>BDA-63</b></p> |    | <p><b>BDA-63</b><br/>IC<sub>50</sub> = 1090 nM</p>     | <p><b>BDA-63</b><br/>IC<sub>50</sub> = 250.5 nM</p>     |
| <p><b>BDA-64</b></p> |  | <p><b>BDA-64</b><br/>IC<sub>50</sub> = 86943 nM</p>  | <p><b>BDA-64</b><br/>IC<sub>50</sub> = 703548 nM</p>  |
| <p><b>BDA-65</b></p> |  | <p><b>BDA-65</b><br/>IC<sub>50</sub> = 6422 nM</p>   | <p><b>BDA-65</b><br/>IC<sub>50</sub> = 5169 nM</p>    |
| <p><b>BDA-66</b></p> |  | <p><b>BDA-66</b><br/>IC<sub>50</sub> = 1292 nM</p>   | <p><b>BDA-66</b><br/>IC<sub>50</sub> = 764.1 nM</p>   |

|               |                                                                                    |                                                                                                                                  |                                                                                                                                   |
|---------------|------------------------------------------------------------------------------------|----------------------------------------------------------------------------------------------------------------------------------|-----------------------------------------------------------------------------------------------------------------------------------|
| <b>BDA-67</b> | 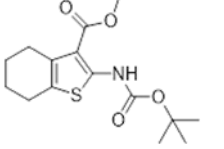  | <p>BDA-67<br/>IC<sub>50</sub> = 1358 nM</p>    | <p>BDA-67<br/>IC<sub>50</sub> = 1009 nM</p>    |
| <b>BDA-68</b> |   | <p>No</p>                                                                                                                        | <p>BDA-68<br/>IC<sub>50</sub> = 58261 nM</p>   |
| <b>BDA-69</b> |   | <p>BDA-69<br/>IC<sub>50</sub> = 1048 nM</p>    | <p>BDA-69<br/>IC<sub>50</sub> = 1029 nM</p>    |
| <b>BDA-70</b> |  | <p>BDA-70<br/>IC<sub>50</sub> = 876.4 nM</p>  | <p>BDA-70<br/>IC<sub>50</sub> = 555.7 nM</p>  |

1860

1861 **Supporting information Table 1.** Chemical structure of BDAs with IC<sub>50</sub> values against *Pf*ATC  
 1862 and *Hs*ATC.

1863

1864

1865

1866

1867

1868

1869

1870

### Potency and Selectivity of selected BDAs

| Compound code | Enzyme        | IC <sub>50</sub> values (nM) | Organism        | EC <sub>50</sub> (μM) |
|---------------|---------------|------------------------------|-----------------|-----------------------|
| <b>BDA-04</b> | <i>Pf</i> ATC | 77.2 ± 1.1                   | <i>Pf</i> (3D7) | 2.4                   |
|               | <i>Hs</i> ATC | 2839 ± 1.1                   | <i>Hs</i>       | ~1000                 |
| <b>BDA-11</b> | <i>Pf</i> ATC | 46 ± 1.2                     | <i>Pf</i> (3D7) | 3.4                   |
|               | <i>Hs</i> ATC | 116 ± 1.2                    | <i>Hs</i>       | 757.1                 |
| <b>BDA-14</b> | <i>Pf</i> ATC | 115 ± 1.2                    | <i>Pf</i> (3D7) | 42.5                  |
|               | <i>Hs</i> ATC | 137 ± 1.2                    | <i>Hs</i>       | >1000                 |
| <b>BDA-24</b> | <i>Pf</i> ATC | 103 ± 1.2                    | <i>Pf</i> (3D7) | 2.0                   |
|               | <i>Hs</i> ATC | 316 ± 1.1                    | <i>Hs</i>       | 910.9                 |

*Pf Plasmodium falciparum, Hs homo sapiens (normal lymphocytes)*

1871

1872 **Supporting information Table 2.** Shows the potency of selected compounds of the BDA series

1873 against isolated enzymes (IC<sub>50</sub>s vs malarial ATC: *Pf*ATC; human ATC: *Hs*ATC) and EC<sub>50</sub>s vs cell

1874 cultures.

1875

1876

1877

1878

1879

1880

1881

1882

1883

1884

1885

1886

1887

1888

1889

1890

1891



|                                                        |                                                                                                                                                                                                                                                                                                                                                                                   |
|--------------------------------------------------------|-----------------------------------------------------------------------------------------------------------------------------------------------------------------------------------------------------------------------------------------------------------------------------------------------------------------------------------------------------------------------------------|
| Gene                                                   | Truncated <i>Pf</i> ATCase (wild type)                                                                                                                                                                                                                                                                                                                                            |
| Source organism                                        | <i>Plasmodium falciparum</i> strain 3D7                                                                                                                                                                                                                                                                                                                                           |
| DNA source                                             | pASK-IBA3- <i>Pf</i> ATC-full plasmid                                                                                                                                                                                                                                                                                                                                             |
| Forward primer ( <i>Bsal</i> )                         | 5'-GCGCGCGGTCTCCAATGTTTTATATCAATAGCAAG-3'                                                                                                                                                                                                                                                                                                                                         |
| Reverse primer ( <i>Bsal</i> )                         | 5'-GCGCGCGGTCTCCGCGCTGCTAGTTGATGAAAAATGAG-3'                                                                                                                                                                                                                                                                                                                                      |
| Expression vector                                      | pASK-IBA3                                                                                                                                                                                                                                                                                                                                                                         |
| Expression host                                        | <i>Escherichia coli</i>                                                                                                                                                                                                                                                                                                                                                           |
| Complete amino acid sequence of the construct produced | MFYINSKYKIDLDKIMTKMKNKSVINIDDDVDEELLAILYTSKQFEKIL<br>KNNEDSKYLENKVFCVFLPSTRTRCSFDAAILKLGSKVLNITDMNS<br>TSFYKGETVEDAFKILSTYVDGIYRDPSKKNVDIAVSSSSKPIINAGNG<br>TGEHPTQSLDFYTIHNYFPFILDRNINKKLNIAFVGLKNGRTVHLSL<br>KLLSRYNVSNFVSCSLNIPKDIVNTITYNLKKNNFYSDDSIKYFDNL<br>EEGLEVDHIIYMTRIQQERFTDVDEYNQYKNAFILSNKLTENTRDTK<br>ILHPLPRVNEIKVEVDSNPKSVYFTQAENGLYVRMALLYLIFSSTSSAW<br>SHPQFEK |
| Gene                                                   | ATCase domain of CAD                                                                                                                                                                                                                                                                                                                                                              |
| Source organism                                        | Homo sapiens                                                                                                                                                                                                                                                                                                                                                                      |
| DNA source                                             | pETM-41-HsATC-full plasmid                                                                                                                                                                                                                                                                                                                                                        |
| HsATCase forward primer                                | agggcgccATGCTGCACTCATTAGTGG                                                                                                                                                                                                                                                                                                                                                       |
| HsATCase reverse primer                                | cgaattcgCTAGAAACGGCCCAGCAC                                                                                                                                                                                                                                                                                                                                                        |
| pETM-41 forward primer                                 | ccgtttctagCGAATTCGAGCTCCGTCG                                                                                                                                                                                                                                                                                                                                                      |
| pETM-41 reverse primer                                 | gcagcatGGCGCCCTGAAAATAAAG                                                                                                                                                                                                                                                                                                                                                         |
| Expression vector                                      | pETM-41                                                                                                                                                                                                                                                                                                                                                                           |
| DNA source                                             | <i>Escherichia coli</i> BL21(DE3)                                                                                                                                                                                                                                                                                                                                                 |
| Complete amino acid sequence of the construct produced | GPMSPLLHSLVQGHIHSVQQFTKDQMSHLFNVAHTLRMMVQKERS<br>LDILKGKVMASMFYEVSTRTSSSFAAAMARLGGAVLSFSEATSSVQKG<br>ESLADSVQTMSCYADVVLVLRHPQPGAVELAAKHCRRPVINAGDGVG<br>EHPTQALLDIFTIREELGTVNGMTITMVGDLKHGRTVHSLACLLTQYR<br>VSLRYVAPPSLRMPPTVRAFVASRGTKQEEFESIEEALPDTDVLYMTRI<br>QKERFGSTQEYEACFGQFILTPHIMTRAKKKMVMHPMPRVNEISVE<br>VDSDPRAAYFRQAENGMYIRMALLATVLRGFR                               |

1892 **Supporting information Table 3.** Macromolecule production information.

1893

1894

|                                              | <i>Pf</i> ATC + Fragment A/B/C/D                                                                                                                      | <i>Pf</i> ATC + Compound 1/BDA-04/BDA-14                                                                                                                    |
|----------------------------------------------|-------------------------------------------------------------------------------------------------------------------------------------------------------|-------------------------------------------------------------------------------------------------------------------------------------------------------------|
| Method                                       | Sitting drop                                                                                                                                          | Sitting drop                                                                                                                                                |
| Plate type                                   | 96 - well                                                                                                                                             | 96 - well                                                                                                                                                   |
| Temperature (K)                              | 293                                                                                                                                                   | 293                                                                                                                                                         |
| Protein concentration (mg ml <sup>-1</sup> ) | 10                                                                                                                                                    | 10                                                                                                                                                          |
| Buffer composition of protein solution       | 20 mM Tris pH 8.0, 300 mM NaCl, 10 mM Na-Malonate, 5% (v/v) glycerol, 3 mM BME                                                                        | 20 mM Tris pH 8.0, 300 mM NaCl, 10 mM Na-Malonate, 5% (v/v) glycerol, 3 mM BME, 1 mM compound 1/BDA-04/BDA-14 (Final DMSO concentration 5% (v/v))           |
| Cyrstallization condition                    | 0.1 M bis-tris propane pH 7.5, 0.2 M Na <sub>2</sub> SO <sub>4</sub> , 15% (w/v) PEG 3350 10 mM fragment A/B/C/D (Final DMSO concentration 10% (v/v)) | 0.1 M bis-tris propane pH 7.5, 0.2 M Na <sub>2</sub> SO <sub>4</sub> , 15% (w/v) PEG 3350 1 mM compound 1/BDA-04/BDA-14 (Final DMSO concentration 5% (v/v)) |
| Volume and ratio of drop                     | 2 μL (1:1)                                                                                                                                            | 2 μL (1:1)                                                                                                                                                  |
| Volume of reserrior                          | 50 μL                                                                                                                                                 | 50 μL                                                                                                                                                       |

1895 **Supporting information Table 4.** Cyrstallization conditions of *Pf*ATCase crystal grown in  
1896 presence of ligand.

1897  
1898  
1899  
1900  
1901  
1902  
1903  
1904  
1905  
1906  
1907  
1908  
1909

| Protein/Ligand                       | <i>Pf</i> ATC+<br>Fragment<br>A   | <i>Pf</i> ATC+<br>Fragment B      | <i>Pf</i> ATC+<br>Fragment C      | <i>Pf</i> ATC+<br>Fragment<br>D   | <i>Pf</i> ATC+<br>Cpd 1            | <i>Pf</i> ATC+<br>BDA-04          | <i>Pf</i> ATC+<br>BDA-14           |
|--------------------------------------|-----------------------------------|-----------------------------------|-----------------------------------|-----------------------------------|------------------------------------|-----------------------------------|------------------------------------|
| <b>PDB entry</b>                     | 7ZCZ                              | 7ZEA                              | 7ZGS                              | 7ZHI                              | 7ZST                               | 7ZP2                              | 7ZID                               |
| <b>Data collection</b>               |                                   |                                   |                                   |                                   |                                    |                                   |                                    |
| Space group                          | P 1 21 1                          | P 1 21 1                          | P 1 21 1                          | P 1 21 1                          | I 1 21 1                           | P 1                               | I 1 2 1                            |
| Cell dimensions                      |                                   |                                   |                                   |                                   |                                    |                                   |                                    |
| a, b, c (Å)                          | a=86.66Å<br>b=103.63Å<br>c=86.86Å | a=87.03<br>b=104.51Å<br>c=87.30Å  | a=86.85Å<br>b=104.37Å<br>c=87.05Å | a=86.71Å<br>b=103.82Å<br>c=87.07Å | a=119.28Å<br>b=89.73Å<br>c=137.05Å | a=87.06Å<br>b=87.36Å<br>c=104.64Å | a=119.26Å<br>b=90.02Å<br>c=136.94Å |
| α, β, γ (°)                          | α=90.00°<br>β=117.45°<br>γ=90.00° | α=90.00°<br>β=117.47°<br>γ=90.00° | α=90.00°<br>β=117.53°<br>γ=90.00° | α=90.00°<br>β=117.92°<br>γ=90.00° | α=90.00°<br>β=109.22°<br>γ=90.00°  | α=89.98°<br>β=90.04°<br>γ=117.72° | α=90.00°<br>β=108.87°<br>γ=90.00°  |
| Resolution (Å)                       | 42.42 -<br>2.45                   | 45.28 -<br>2.45                   | 45.13 -<br>2.35                   | 43.54 -<br>2.95                   | 49.50 -<br>2.50                    | 62.19 -<br>2.30                   | 45.56 -<br>2.80                    |
| R <sub>merge</sub>                   | 0.04<br>1.53                      | 0.05<br>1.54                      | 0.04<br>1.71                      | 0.09<br>1.89                      | 0.03<br>2.01                       | 0.06<br>2.45                      | 0.04<br>1.15                       |
| I/σ                                  | (2.45Å)                           | (2.45Å)                           | (2.34Å)                           | (2.95Å)                           | (2.51Å)                            | (2.29Å)                           | (2.29Å)                            |
| Completeness(%)<br>redundancy        | 99.1 (85.5)<br>3.4 (3.3)          | 99.3 (96.3)<br>3.4 (3.3)          | 98.3 (95.0)<br>3.4 (3.2)          | 98.3 (95.0)<br>3.3 (3.2)          | 99.9 (99.8)<br>2.0 (2.0)           | 96.0 (96.0)<br>1.7 (1.8)          | 97.7 (95.1)<br>1.9 (1.9)           |
| <b>Refinement</b>                    |                                   |                                   |                                   |                                   |                                    |                                   |                                    |
| Resolution(Å)                        | 2.45 Å                            | 2.45 Å                            | 2.35 Å                            | 2.95 Å                            | 2.50 Å                             | 2.30 Å                            | 2.80 Å                             |
| No. Reflections<br>(unique)          | 49863                             | 50829                             | 56531                             | 28662                             | 47372                              | 117672                            | 59389                              |
| R <sub>work</sub> /R <sub>free</sub> | 0.177/0.21<br>6                   | 0.185/0.22<br>3                   | 0.218/0.27<br>8                   | 0.192/0.23<br>5                   | 0.241/0.28<br>4                    | 0.166/0.19<br>3                   | 0.187/0.23<br>6                    |
| No. Atoms                            |                                   |                                   |                                   |                                   |                                    |                                   |                                    |
| Protein                              | 16380                             | 16261                             | 16261                             | 16380                             | 15550                              | 32760                             | 15689                              |
| Ligand                               | 18                                | 18                                | 23                                | 16                                | 35                                 | 56                                | 47                                 |
| Water                                | 163                               | 163                               | 59                                | 31                                | 44                                 | 44                                | 16                                 |
| B-factors                            |                                   |                                   |                                   |                                   |                                    |                                   |                                    |
| Protein                              | 65.84                             | 57.57                             | 65.3                              | 74.77                             | 60.91                              | 58.92                             | 81.91                              |
| Ligand                               | 65.84                             | 75.8                              | 73.12                             | 100.56                            | 76.72                              | 65.28                             | 114.0                              |
| Water                                | 52.82                             | 45.75                             | 53.09                             | 48.6                              | 43.18                              | 47.15                             | 55.75                              |
| R.m.s deviations                     |                                   |                                   |                                   |                                   |                                    |                                   |                                    |
| Bond<br>lengths(Å)                   | 0.0121                            | 0.0126                            | 0.0118                            | 0.0094                            | 0.0095                             | 0.0144                            | 0.0103                             |
| Bond angles(°)                       | 1.862                             | 1.870                             | 1.874                             | 1.731                             | 1.746                              | 2.037                             | 1.712                              |

1910 **Supporting information Table 5.** Data collection and model refinement statistics.

1911

1912

1913

1914

1915 **References**

- 1916 25. Krug, M.; Weiss, M. S.; Heinemann, U.; Mueller, U., XDSAPP: a graphical user interface for the  
1917 convenient processing of diffraction data using XDS. *Journal of Applied Crystallography* **2012**, *45* (3), 568-  
1918 572.
- 1919 26. Winn, M. D.; Ballard, C. C.; Cowtan, K. D.; Dodson, E. J.; Emsley, P.; Evans, P. R.; Keegan, R. M.;  
1920 Krissinel, E. B.; Leslie, A. G.; McCoy, A., Overview of the CCP4 suite and current developments. *Acta*  
1921 *Crystallographica Section D: Biological Crystallography* **2011**, *67* (4), 235-242.
- 1922 27. Emsley, P.; Lohkamp, B.; Scott, W. G.; Cowtan, K., Features and development of Coot. *Acta*  
1923 *Crystallographica Section D: Biological Crystallography* **2010**, *66* (4), 486-501.
- 1924 28. Murshudov, G. N.; Vagin, A. A.; Dodson, E. J., Refinement of macromolecular structures by the  
1925 maximum-likelihood method. *Acta Crystallographica Section D: Biological Crystallography* **1997**, *53* (3),  
1926 240-255.
- 1927 29. Berman, H. M.; Westbrook, J.; Feng, Z.; Gilliland, G.; Bhat, T. N.; Weissig, H.; Shindyalov, I. N.;  
1928 Bourne, P. E., The protein data bank. *Nucleic acids research* **2000**, *28* (1), 235-242.
- 1929 30. Chin, W.; Moss, D.; Collins, W. E., The continuous cultivation of Plasmodium fragile by the method  
1930 of Trager-Jensen. *The American Journal of Tropical Medicine and Hygiene* **1979**, *28* (3), 591-592.
- 1931 31. Das Gupta, R.; Krause-Ihle, T.; Bergmann, B. r.; Müller, I. B.; Khomutov, A. R.; Müller, S.; Walter,  
1932 R. D.; Lüersen, K., 3-Aminoxy-1-aminopropane and derivatives have an antiproliferative effect on  
1933 cultured Plasmodium falciparum by decreasing intracellular polyamine concentrations. *Antimicrobial*  
1934 *agents and chemotherapy* **2005**, *49* (7), 2857-2864.
- 1935 32. Smilkstein, M.; Sriwilaijaroen, N.; Kelly, J. X.; Wilairat, P.; Riscoe, M., Simple and inexpensive  
1936 fluorescence-based technique for high-throughput antimalarial drug screening. *Antimicrobial agents and*  
1937 *chemotherapy* **2004**, *48* (5), 1803-1806.
- 1938 33. Meissner, K. A.; Kronenberger, T.; Maltarollo, V. G.; Trossini, G. H. G.; Wrenger, C., Targeting the  
1939 Plasmodium falciparum plasmepsin V by ligand-based virtual screening. *Chemical Biology & Drug Design*  
1940 **2019**, *93* (3), 300-312.

1941

1942

1943

1944

1945

1946

1947

1948

1949

1950

1951
